# Supplementary material for: Distinct Types of Fibrocyte Can Differentiate from Mononuclear Cells in the Presence and Absence of Serum
Source: PLoS One. 2010 Mar 18;5(3):e9730. doi: 10.1371/journal.pone.0009730 (PMC2841180; doi:10.1371/journal.pone.0009730)
Supplement: Table S3 — Genes identified by SAM (0.1% FDR) when comparing macrophages, SC fibrocytes and SF fibrocytes. (2.06 MB XLS) [file pone.0009730.s006.xls]

## Sheet: SAM SC SF Mac 0.1
Original row	Name	ID	SF Fibrocyte 1	SF Fibrocyte 2	SF Fibrocyte 3	SF Fibrocyte 4	SF Fibrocyte 5	SF Fibrocyte 6	SF Fibrocyte 7	SF Fibrocyte 8	SF Fibrocyte 9	SC Fibrocyte 1	SC Fibrocyte 2	SC Fibrocyte 3	SC Fibrocyte 4	SC Fibrocyte 5	SC Fibrocyte 6	SC Fibrocyte 7	SC Fibrocyte 8	SC Fibrocyte 9	Macrophage 1	Macrophage 2	Macrophage 3	Macrophage 4	Macrophage 5	Macrophage 6	Macrophage 7	Macrophage 8	Macrophage 9
22673	MUC3B	H300021282	-0.949065	0.469926	-0.728985	-2.98749	-0.956418	-1.1785	-0.501654	-1.16744	0.23098	1.36608	1.63074	1.52079	1.00447	1.06972	0.131734	0.473725	-0.000291387	0.806629	-0.221567	0.833044	-0.342428	-0.372427	-0.223469	-0.111438	0.0471013	-0.417162	0.573392
9503	AAMP	H200007023	0.553965	-0.21723	-1.24249	-1.38646	-1.45841	-1.55956	-1.11695	-1.36833	-0.932011	-0.070673	0.90683	0.943937	0.404758	0.213485	0.137814	0.949079	1.51131	1.62753	2.1549	-0.0116668	0.137355	-0.0515399	-0.0712528	0.545243	0.364252	-0.860671	-0.103224
8338	opHsV0400012557	opHsV0400012557	-0.474443	0.515656	-0.918744	1.04042	0.179541	0.336464	-0.378645	-0.050341	-0.917952	0.996666	1.33463	1.24283	0.748646	2.63411	0.882151	-0.163493	0.134557	0.392051	-0.0195565	-0.672899	-2.12375	0.0434172	-1.27056	-0.828895	-0.996386	-0.773457	-0.892024
14094	CKS1B	opHsV0400005686	1.14857	-0.0406261	-0.108433	1.44562	0.611615	1.40433	1.14667	0.734585	-0.110909	0.648565	0.897675	0.483589	0.479645	1.29371	0.0217038	-0.585255	-0.375414	-0.223816	-0.297401	-3.04689	-0.846392	-0.531874	-0.476305	-0.848961	-1.32665	-0.383538	-1.11379
35218	ZNF274	H200007060	-0.231121	0.4441	1.45683	2.43712	2.70593	1.74089	0.311495	-0.341531	0.421188	-0.622881	-1.20916	-0.840884	-0.588247	-0.615659	-0.459922	-0.663401	-0.374626	-0.59868	-0.333364	-0.0753246	-0.975362	-1.14671	-0.157401	-0.307965	-0.0531829	0.0740343	0.00383554
10099	ALDH1A2	H300010760	-0.91787	-0.00861205	1.09726	-0.501893	-0.424984	-0.766071	-0.778489	-1.22831	-0.62979	1.26404	1.55553	1.46189	1.64314	1.52977	0.630556	0.44926	0.545871	0.0205902	-0.462681	1.35048	-1.2754	-1.02453	-1.33802	-1.2235	-0.219133	-0.364902	-0.384207
25141	OR2T34	H300002498	0.813157	-0.294897	1.44458	1.72595	0.691339	1.88186	0.864319	1.21337	0.704647	-0.530786	-0.714711	-0.756491	0.433544	-2.13079	-1.26046	-0.764025	-0.198785	0.440479	-1.11577	-1.68508	-0.774685	-0.0250971	0.184558	0.0325969	0.124187	-0.443199	0.140183
12882	C9orf47	H300002135	1.09251	-0.0780055	-0.961255	-2.49012	-1.17859	-1.65817	-0.773645	-0.146911	0.0882836	0.192386	1.34522	1.11634	1.27591	0.940032	1.23759	0.864197	0.683547	1.25538	-0.774412	-1.2989	-0.474355	0.317002	0.249392	0.0252068	-0.17186	-0.181558	-0.495221
15016	CYB561D2	H200013667	0.136822	-1.3793	0.733462	1.05586	0.28956	1.12038	0.071592	-0.160062	-0.0410405	-1.9407	-0.906246	-0.443486	-1.63747	-1.40417	-0.0136094	-1.09488	-0.455856	-0.748703	0.0784296	-0.731539	1.41291	0.935561	1.47468	1.41437	1.18915	0.295785	0.748515
3039	opHsV0400004569	opHsV0400004569	0.0910804	0.292455	0.534324	2.76494	2.25284	2.1582	0.176818	0.206642	0.168949	-0.1346	-0.22989	-0.383638	0.511036	-0.147752	-0.405825	-0.216525	-0.416608	-0.406302	-0.21989	-0.070436	-0.897438	-1.01083	-1.06499	-1.2257	-0.455321	-0.382094	-1.48945
9889	ADK	H200010643	1.24184	1.07472	0.653483	1.98732	1.20313	1.57254	-0.0917893	0.824943	0.543521	-1.8531	-1.86407	-1.80188	0.7923	0.365823	-0.00447467	-0.39725	-0.308298	-0.618274	0.0520125	0.142397	0.138061	-0.923798	-0.531663	-0.326449	-0.672996	-0.515047	-0.682986
15303	DDX59	opHsV0400002182	1.40165	0.541129	0.526169	2.10808	1.17619	0.86885	0.693575	0.982709	0.435035	-0.290961	-1.80343	-1.22742	0.234685	0.597753	0.454133	-1.65536	-1.34191	-1.58905	0.338613	-1.42822	-0.343822	-0.181228	0.0261846	-0.0650323	-0.367922	0.32172	-0.412138
28231	Q8N8Q5_HUMAN	opHsV0400001278	-0.51135	-1.8301	-0.392928	0.340168	0.79272	-0.37881	-0.515197	-0.666188	-1.31752	-1.05131	-1.12406	-1.5869	-0.373368	0.0989086	-0.80422	-0.597188	-0.00824217	0.812706	1.99325	-0.0107538	1.31131	1.32176	1.24685	1.37379	0.610427	0.362907	0.903326
21721	MAML3	opHsV0400001395	0.294061	-1.58155	-0.487282	-1.76683	-1.40779	-2.31047	-0.838601	0.353838	-0.564095	1.12963	0.802711	0.602557	-0.627472	0.939526	0.929727	1.31109	0.900269	1.40877	0.194958	-0.0140296	-0.575775	-0.826085	-0.138354	0.113291	0.752827	0.632024	0.77305
9781	ADAM11	opHsV0400004598	-0.678244	0.750763	-0.932751	-0.957127	-1.2332	-1.67647	-0.563164	-1.88249	-0.708411	1.54061	1.70238	2.3137	0.911487	0.337588	-0.407062	0.990113	0.115696	0.399464	0.149337	-0.305684	0.736152	0.174313	0.293744	0.0727024	0.00289668	-0.865485	-0.280872
18938	HOXB6	H300010472	-0.35821	0.183684	-0.0684564	-2.3784	-2.07028	-2.76448	-0.106369	-0.0950896	-1.34308	0.39294	0.254949	0.46243	0.187269	0.170581	0.516414	0.481027	0.433676	0.361543	0.94766	0.664697	-0.10023	0.785593	0.674735	0.254941	0.611142	0.480931	1.42038
4127	opHsV0400007614	opHsV0400007614	-1.40749	0.272844	-1.20527	-0.848051	-1.27581	-0.795573	-1.20009	-1.11859	-0.864842	1.29446	1.21902	2.12887	0.551405	2.01725	0.393895	0.246945	-0.461817	-0.195585	1.75663	-0.106599	-0.251937	0.454493	-0.0438622	0.119371	-0.211344	-0.224158	-0.244173
17802	GLB1L	H300013712	-0.679524	-1.71212	1.18149	-1.37176	-1.74408	-0.674132	0.137137	0.0662682	0.471601	0.288567	-1.1112	-0.938077	-0.560318	-0.555106	0.389938	-0.787065	-0.740817	-0.771866	0.0943046	1.11798	1.34184	1.31679	0.408955	1.01775	1.20157	1.2984	1.31349
25689	PCBP3	opHsV0400006376	-0.722208	-0.745219	0.233171	-0.992686	-1.32346	-0.719654	-1.03575	-0.454797	-0.826387	0.683899	0.337537	0.668083	1.61319	2.26523	0.313136	0.881393	0.822844	1.16492	1.80041	-1.76858	-0.686803	-1.03554	-0.167927	-0.0523033	0.00766004	-0.0953506	-0.164823
27823	Q6ZQP8_HUMAN	opHsV0400009008	-0.916622	2.44391	0.379714	0.381876	0.294014	0.606187	-0.63376	-1.07196	-0.603331	-1.56782	-0.681614	-0.784367	-0.812545	-0.896167	-1.13689	-1.12117	-0.688836	-0.607962	1.62237	0.0440156	0.554543	1.31666	0.99771	0.880559	1.15172	0.430398	0.419374
31563	SORBS3	H200004247	-0.307525	-1.34322	-0.535377	-1.24854	-1.52045	-0.98824	-0.973904	-0.67703	-1.27843	0.703147	1.19991	1.83948	1.50867	1.88195	1.27773	-0.705176	-0.666583	-0.791712	-0.375573	0.289684	0.746663	0.251168	0.364303	0.595996	0.459041	0.116254	0.177772
27227	PSTPIP2	H300013851	-2.19295	-0.976351	0.233376	-0.662024	-1.32993	-1.01724	0.46219	0.119446	0.216178	0.499869	-0.689834	-0.135081	0.133146	0.536417	-1.03995	-0.441592	-1.18639	-1.61885	0.342284	0.468139	1.28695	1.29065	0.926192	1.40565	1.20794	0.96912	1.19264
4695	opHsV0400008293	opHsV0400008293	-0.357473	0.250127	-0.334946	-2.58549	-1.62545	-2.62333	-1.34868	-0.314103	-0.176415	0.731354	0.370991	0.857066	0.940607	0.335698	0.326128	0.314647	0.320398	0.445293	0.653019	-0.702707	0.0974259	0.558223	0.45938	0.929241	0.408208	1.07165	0.999142
20150	KIAA0195	H200009966	-0.474105	-0.7533	0.000384942	-1.50007	-0.383094	-0.831326	-1.8145	-1.2578	-1.43438	-0.629732	1.20196	1.56347	0.455811	0.31661	0.758396	0.494058	1.28405	1.74629	1.59554	0.148546	-0.0641251	-0.0989831	0.0388269	0.641788	0.138489	-1.41079	0.267981
30670	SH3BP1	H300010567	-2.06687	-1.4096	1.71065	-0.715732	-0.604287	0.628852	-0.575084	-0.720831	-0.653787	-0.870061	-0.483307	-0.334459	-0.548711	-1.38921	-0.486497	0.00704075	-0.195474	-0.408119	0.634374	0.228009	1.18636	1.14534	1.62921	0.942828	1.18873	0.968595	1.19205
34146	UPF2	H300022683	-0.692746	0.19719	0.569747	1.68233	1.57317	2.54798	0.0583766	0.425713	0.491196	-1.17041	-1.0313	-1.15482	-0.863194	-0.523447	-0.0234983	-1.41173	-0.941486	-1.51434	0.871924	-0.609041	-0.716233	0.651497	0.81937	0.302293	0.372424	0.038488	0.0505548
16390	ERCC2	H200011039	-1.15826	0.142073	-0.44357	-2.45629	-2.09341	-2.58649	-0.456839	-0.255882	0.192913	0.83808	0.552452	1.00598	0.733364	1.10041	0.205833	0.0265434	-0.0200125	-0.0271688	0.509312	0.129897	0.287036	1.03297	0.905228	0.65256	0.177349	0.460588	0.545332
30588	SFRS11	H200002006	3.08689	1.05279	0.79463	0.762374	1.424	-0.203708	0.754236	0.283433	0.890545	-1.19811	-0.472805	-1.11625	-0.224751	-0.0108186	0.159826	-1.49539	-1.07505	-0.904209	0.662698	0.60968	0.0226045	-0.745085	-0.626712	-0.865673	-0.603183	-0.243714	-0.718258
13741	CDKN2D	H200003940	-2.59511	-1.28637	0.457159	-1.58363	0.373651	-1.44243	-0.730169	-0.548783	-0.276433	-0.0345878	0.449642	-0.0608995	-0.431804	0.587099	-0.495833	-0.0753486	-0.378432	-0.063433	0.637595	-0.192534	1.15315	0.204097	1.97891	0.815407	1.30422	0.991775	1.24308
2048	opHsV0400000641	opHsV0400000641	-0.586431	0.250784	-0.206861	-1.51068	-1.42358	-1.04348	-0.386527	-0.807516	-0.441816	1.47802	2.08309	2.17082	1.28376	1.70359	1.32729	-0.321462	-0.40059	-0.422036	-0.335587	-0.657405	-0.314921	-0.162455	-0.314102	-0.0557165	-0.0776923	-0.563693	-0.264811
4713	opHsV0400008323	opHsV0400008323	-0.546435	0.0625028	0.973035	1.82501	2.22465	2.62592	0.202083	0.314026	0.22881	0.375019	0.167531	-0.0270549	0.153679	0.039567	-0.171564	-0.238838	-0.271375	-0.0541873	-0.555363	-0.374317	-1.76363	-1.12704	-1.40295	-1.21732	-0.551416	-0.292995	-0.597356
13068	CAMSAP1L1	H200003298	2.06383	0.291768	0.0466588	0.700418	1.6206	1.80488	0.57441	0.419521	0.138058	-1.00821	-0.804399	-1.80708	-0.887001	-0.544861	-0.298314	-1.10057	-0.672961	-0.98929	0.164604	1.9193	0.637552	-0.457169	-0.567659	-1.13346	-0.234702	0.143158	-0.0190993
28092	Q8N1B8_HUMAN	H300007104	0.509208	-0.355444	0.490716	2.69773	1.8123	1.6882	0.302076	0.381431	0.67248	0.136762	0.0136902	0.163309	-0.542618	0.283451	0.113434	-0.0294453	-0.278143	-0.503719	-0.176707	0.195691	-0.375236	-1.4518	-1.76632	-0.207275	-1.0888	-0.998735	-1.68623
3598	opHsV0400006516	opHsV0400006516	-0.938932	0.153128	-0.273482	0.153922	0.323145	0.728345	-0.815233	-0.653549	-0.440555	1.75157	1.92812	1.80637	1.73484	-0.933928	1.3506	0.512722	-0.0458726	0.526149	0.244149	-0.959303	-1.07762	-0.400362	-1.21395	-0.883173	-0.941578	-0.826755	-0.808776
22304	MNT	opHsV0400000018	-0.289574	0.487441	-0.214511	-2.4036	-1.78434	-1.98938	-0.261096	-0.694105	-0.122257	1.65921	1.48532	1.61565	0.934524	1.35949	0.774098	0.411303	-0.105093	0.268173	0.326632	0.324153	-0.508603	-0.415777	-0.516768	-0.281119	0.0105012	0.0499962	-0.120265
27337	PTPRC	H300021687	-0.595852	0.205508	2.89715	0.954612	1.37766	1.44489	0.0273979	-0.026337	0.542764	-1.39096	-1.51194	-1.16834	-1.17226	-1.68095	-0.847025	-0.202449	-0.272888	-0.403499	-0.218636	0.771076	0.0526942	-0.0029772	-0.113948	0.0845674	0.564772	0.252471	0.432499
22845	N4BP3_HUMAN	H300004304	-0.570906	0.779761	0.0475593	-1.89168	-1.84538	-1.96123	-0.3801	-0.845551	-0.5512	0.965983	1.86061	1.31022	0.553625	0.448476	0.197883	0.872161	0.99081	1.23697	1.214	0.354262	-0.449642	-0.118441	-0.757587	-0.429711	-0.0160004	-0.665436	-0.34946
34390	VPS11	H200015499	0.259061	-0.674758	0.580532	0.485085	0.748355	0.368609	0.242365	0.233284	0.346503	-1.10026	-1.17115	-0.529542	-2.49197	-2.20874	-2.03007	0.55091	-0.173217	0.285959	0.0372315	1.04092	1.25531	0.358323	0.419202	0.720323	0.769201	0.791513	0.887015
32785	TJP2	H300017730	-0.328628	0.411487	-0.64799	-2.0743	-1.87386	-2.09054	-0.127042	-1.83989	-0.473896	1.16668	0.780801	1.48514	0.651758	0.580397	1.21238	-0.163446	-0.123962	-0.0515082	-0.203552	0.369501	0.159667	1.39733	0.205577	0.22533	0.426643	0.162931	0.763002
17224	FMNL3	H300000750	-0.849591	-0.286301	0.105611	-1.79126	-0.988857	-1.58779	0.391329	0.196667	0.0799977	-0.660842	-0.687789	-0.267171	-1.12437	-0.385315	0.723812	-0.381582	-0.733639	-0.871734	2.65052	0.51454	1.39704	0.505708	1.13956	-0.10043	0.775267	1.18687	1.04976
26798	PPP1R9A	H200015901	-0.227932	-0.078103	-1.75153	0.324897	-0.860179	0.981626	-0.176587	1.84639	0.196851	1.71763	0.732124	1.45728	1.11403	1.06992	0.577413	0.28433	0.672553	0.143063	-0.8681	-0.731341	-1.0596	-0.736173	-1.11757	-0.880401	-0.443666	-0.339215	-1.84771
30987	SLC25A32	H200014732	1.01697	0.345898	0.16065	2.20905	1.57148	2.53081	0.358147	-0.0179254	0.824416	-0.806593	-0.414389	-1.01526	-0.596531	-0.120735	-0.55125	-1.01673	-0.611747	-0.652608	-0.286873	-0.743731	-0.699692	-0.564451	-0.512683	-0.875212	-0.744138	-0.426475	1.63961
12073	C19orf6	H300018919	-0.44547	-0.160205	1.04208	-0.495295	0.34071	-0.084372	-0.368692	-0.0255508	0.082439	-1.67514	-1.57926	-1.12465	-0.929775	-1.99788	-1.49894	0.0843548	0.581984	0.297899	2.07279	-0.252902	0.791485	0.466005	1.02683	1.00156	1.18083	0.718935	0.950217
10765	ARSA	H200010273	-0.95457	-0.510903	0.681025	0.814188	-0.602405	-0.910578	0.197701	-0.00390093	0.448142	-2.2582	-0.731197	-0.50269	-1.36771	-1.5247	-1.03045	-0.969756	0.74939	0.190393	0.505633	0.998772	0.733832	0.0427875	0.757798	0.859505	1.52478	1.26325	1.59986
4643	opHsV0400008208	opHsV0400008208	0.990754	-0.479401	1.9498	-0.671063	-0.462024	-1.18912	0.943666	0.170072	0.893692	-0.805894	-0.94107	-1.00413	-0.904112	-0.813768	-0.904987	-0.375897	-0.573131	-2.428	0.175109	0.790791	1.02755	0.3774	1.44271	0.890343	0.54623	0.818411	0.536075
14447	COMMD4	H300006211	0.509653	-1.33121	-0.828149	-1.25718	-2.19746	-1.32742	-0.698464	-0.847372	-1.14353	-0.504493	0.862081	0.292351	1.09745	-0.158358	0.087257	0.889682	0.249254	1.88517	1.54692	0.979519	0.826502	0.374683	0.0135709	1.19709	-0.274655	-0.400317	0.15743
14274	CN109_HUMAN	H200017199	0.631788	0.604115	2.51424	1.36465	0.909435	0.955766	0.034368	-0.144948	0.677334	-1.49991	-1.57139	-1.50739	-0.815373	-0.867819	-0.703009	-0.432611	-0.407651	-0.406901	-0.66274	2.15566	-0.0258622	-0.0318344	0.0646215	-0.25026	0.0691474	-0.460017	-0.193404
32269	TADA3L	H200007296	-0.54526	-0.828218	0.263508	-1.93743	-1.51273	-2.37879	0.26781	-0.31831	-0.178115	0.862631	1.48493	0.221192	1.46448	1.22857	1.32895	1.00509	-0.384071	1.26196	-0.00615472	-0.372671	0.615939	-0.941054	-0.467367	0.334714	-0.286402	-0.233427	0.0502204
6561	opHsV0400010600	opHsV0400010600	0.842491	-0.524397	1.66457	0.816236	0.835141	-0.587386	0.565728	1.24171	0.0912418	-1.66802	-1.13508	-1.57182	-1.3048	-0.466145	-1.15649	-1.02103	-0.477901	-0.313093	0.609927	-1.35998	0.352242	0.973666	1.4008	1.297	-0.141997	0.547053	0.490351
2215	opHsV0400001479	opHsV0400001479	1.27894	0.560205	-0.534109	2.69558	2.44755	2.22906	0.314596	-0.0612418	0.191835	-0.582825	-0.372308	-0.790712	-0.592719	-0.694587	-0.66342	-0.313968	-0.266045	-0.490578	-0.259086	-0.303073	-0.836622	-0.61722	-0.577926	-0.787835	-0.354694	-0.0846173	-0.53418
22302	MNDA	H200013910	-0.589917	-0.356787	2.26461	1.38005	1.56985	1.21629	0.411789	0.308191	0.470781	-1.44007	-1.21435	-0.97624	-1.76364	-2.03864	-1.01415	-0.0783306	0.0106321	-0.211813	-0.017632	0.384834	0.284161	-0.183563	0.168789	-0.142335	0.667773	0.270411	0.619302
20809	LASP1	H300012504	-1.57045	-0.593079	0.604833	-1.11391	-1.31383	-0.869133	-0.342096	-0.805659	-0.0567604	-1.21099	-0.326184	0.00488944	-1.02677	-1.9031	-0.273573	0.335994	0.709239	0.811196	0.416205	0.862497	0.112722	1.12633	1.05182	1.36738	1.53639	0.958237	1.50781
11238	BCAR1	opHsV0400002952	0.300302	-0.306005	-0.532126	-2.98932	-1.57674	-2.53296	-0.725491	-0.352429	-0.152737	-0.640816	0.27992	0.419691	0.171544	0.268922	0.12464	0.568467	0.646518	0.726557	0.777809	1.28336	0.742232	0.626648	0.662821	0.596434	0.744753	0.279557	0.588444
6249	opHsV0400010200	opHsV0400010200	0.296977	0.440632	-1.06113	-0.632737	-1.58073	-1.62221	-1.05388	-0.328083	-0.296766	0.64038	1.66794	1.94099	1.64637	0.726583	1.65683	0.426698	-0.261461	0.549704	0.611196	-1.03772	-1.18929	0.51284	-0.191643	-0.154846	-0.797297	-0.351535	-0.557821
18834	HMGN1	opHsV0400010311	1.25019	0.327487	-0.146025	0.564786	0.806575	0.864078	-0.000534811	0.207731	0.0308033	0.0169587	0.659016	0.545295	0.703104	0.767256	0.663676	0.547106	0.88171	0.408106	-3.91828	-0.898949	-0.647241	-0.737245	-0.406157	-0.788145	-0.632871	-0.243905	-0.824531
12768	C7orf31	H200012363	0.186736	0.465763	2.17404	2.22444	0.911337	1.75856	-0.352847	-0.346705	0.218129	-0.555058	-1.04094	-0.843345	-0.389893	-0.0183487	-0.64202	-1.60317	-1.47878	-1.86328	0.279595	0.172871	0.692616	-0.14241	-0.190814	-0.0880948	0.0674552	-0.132291	0.536456
29388	RDH11	H200008381	0.676264	0.196221	0.754714	2.32415	2.06583	1.96845	0.18045	0.335188	0.409451	-0.628223	-0.385847	-1.02325	-1.3266	-1.3134	-0.999116	-0.19802	-0.255824	-0.0402928	-0.11639	1.21969	-1.50238	-0.788804	-0.412212	-0.393009	-0.282145	-0.283962	-0.180939
6907	opHsV0400010987	opHsV0400010987	0.224681	-0.215439	0.931332	2.06216	2.11981	2.4175	0.328095	1.08809	0.171776	0.308153	-0.548305	-0.651636	-1.15116	-0.935264	-0.0967686	-0.396923	-0.14302	-1.02355	0.0654621	-1.20407	0.0586545	-1.59433	-0.414495	-0.576968	-0.37788	0.0248458	-0.470745
3444	opHsV0400005731	opHsV0400005731	-1.75364	-0.823835	-1.8685	-1.54049	-0.0799044	-0.734645	0.00895051	0.0386329	-0.00597116	1.17408	1.30265	1.85307	1.74388	1.63681	1.56515	-0.0395225	-0.0811238	-0.461834	-0.547107	0.14333	-0.11407	-0.258356	-0.490724	-0.194495	-0.065142	0.0861371	-0.493343
11819	C14orf131	H300019662	0.161928	-2.88325	-0.894633	-0.000855502	-0.422898	-0.175817	-1.75015	-1.21233	-1.89285	0.0377519	1.11768	1.01579	-0.492929	0.892952	0.336867	0.437296	0.0984288	0.198956	0.320257	1.3002	-0.082782	0.629408	0.567072	0.750338	0.772138	0.0881662	1.08327
26204	PIK3CD	H300021190	0.763407	0.789979	0.199151	1.79094	1.14386	1.30796	-0.0396238	-0.256948	-0.0478406	-1.36398	-1.13836	-1.20227	-1.78497	-1.7932	-1.5475	0.0121759	-0.286238	0.0691597	1.95422	-0.609073	0.381098	0.478301	0.0958209	0.0429266	0.359412	0.473944	0.207647
27126	PSD	H300008018	-1.01102	0.88214	-0.68753	-0.651192	-0.72436	-0.188783	-0.798944	-0.64073	-0.32784	1.35176	1.99067	1.84315	2.21031	1.76473	0.932269	-0.301155	-0.432473	-0.241998	-0.13484	-0.607783	-0.549015	-0.570425	-0.622433	-0.430457	-0.764589	-0.953631	-0.335825
27062	PRR17	opHsV0400005194	-0.271434	1.16747	1.0438	-0.472287	-0.508127	0.365106	-0.530757	-0.332319	-2.27962	1.15304	0.873123	1.35839	1.47166	1.0926	0.825491	1.16269	-0.106806	0.827006	0.344083	-0.495836	-1.26407	-0.442275	-0.961477	-0.768708	-0.948178	-1.25648	-1.04609
5398	opHsV0400009240	opHsV0400009240	0.161503	0.986907	-0.0184226	-1.64863	-1.03712	-0.26693	-0.528268	-0.111586	-0.807822	1.44586	0.837209	0.169518	0.738246	0.677007	2.12325	1.09077	0.790747	1.14468	-0.474691	0.811468	-0.769545	-1.87659	-1.02948	-1.32704	-0.318078	-0.89281	0.129845
33308	TP53AP1	opHsV0400005508	0.440607	-0.296961	-1.08448	-2.27286	-1.87741	-2.00089	-0.425982	-1.01577	-0.357844	1.71954	1.49418	1.28606	0.146935	1.16371	0.537482	-0.157966	0.0995553	-0.0473555	0.784612	0.615602	0.359113	-0.213038	-0.0477362	0.28042	0.366284	-0.222223	0.726408
12151	C1orf167	H300021474	-1.43378	1.16633	0.211438	-2.20407	-1.75494	-1.67348	-1.18955	-1.17358	-0.282328	1.00734	1.02662	0.910591	0.863381	0.80191	0.657556	0.996249	0.604638	0.528518	1.04559	0.402161	-0.636246	-0.448225	-0.31818	-0.321401	0.380792	0.327233	0.505428
16960	FBXO30	H200010710	0.719055	-0.862248	1.5724	0.768878	1.48668	-0.240619	1.1208	0.145285	0.373191	-0.957349	-1.43421	-1.1884	-1.15916	-0.838361	0.108478	-1.00736	-1.42533	-1.20851	-0.418943	1.86054	-0.0664314	0.381032	1.55291	0.795428	0.312648	-0.0621419	-0.328254
17061	FES	opHsV0400001699	-1.50975	0.249212	-0.527263	-0.954998	-0.377185	-0.103253	-1.02005	-1.1532	-0.555244	0.1047	0.372726	0.677243	-0.0419533	-1.69179	0.092647	-0.757404	-0.849431	-0.927681	0.951168	-0.856663	0.780084	0.682373	1.387	1.57381	1.1183	1.85491	1.4817
24690	NT5C3	H300019035	2.23879	0.984011	1.02249	1.21381	0.555776	-0.0936837	0.832041	0.96975	0.737817	-0.548204	-0.564326	-0.224277	0.599467	1.8771	0.555611	-1.28814	-0.602014	-1.06178	-0.833112	-0.181786	-0.269277	-1.33547	-1.25216	-0.973057	-0.935595	-0.779758	-0.644036
18375	GUSB	opHsV0400003943	0.111577	0.522218	1.24111	-0.666041	-0.507645	-0.16546	0.495697	0.271461	0.24238	-2.1366	-2.08431	-0.606692	-1.45785	-1.79453	-1.40922	0.217857	0.181974	0.522738	0.777296	1.23663	0.744924	0.399181	0.646532	0.705409	0.923213	0.456456	1.1317
17153	FIBCD1	H300011589	0.228085	-1.45484	-2.54593	-0.524077	-0.65585	-0.132509	0.0129656	0.76553	-0.403902	0.67653	1.29557	0.4719	1.18917	1.54264	1.15372	1.19658	0.762195	0.841923	-1.8318	-0.291457	-1.29063	0.362439	-0.46443	-0.13454	-0.249677	-0.303961	-0.215638
27670	Q5VYG3_HUMAN	opHsV0400007073	0.240836	0.625216	0.610487	2.13206	1.94592	1.79476	-0.678059	-0.0434194	-0.459533	0.502975	0.787172	0.744754	0.497919	-0.179451	-0.487385	0.378752	0.43375	0.0691446	-0.77517	-0.669421	-0.718864	-0.91312	-0.390112	-0.856897	-1.73387	-1.04639	-1.81205
2034	opHsV0400000553	opHsV0400000553	-0.274757	0.160639	0.231693	-1.10945	-1.90647	-1.64657	-0.510213	-0.709285	-0.274791	-0.180859	-0.365076	-0.707572	-0.53212	-1.0998	0.2414	0.39065	-0.352888	-0.308026	2.98779	0.343675	0.82119	0.799793	-0.158342	0.762883	1.23766	1.00332	1.15552
1415	H300010711	H300010711	0.707261	0.282954	0.546568	2.17161	1.93309	2.07792	0.24747	0.402488	0.441622	-1.39986	-0.0448129	-1.45799	0.664484	0.015394	0.466398	-0.225989	-0.0350758	-0.304387	-0.490352	0.395399	-1.51458	-0.827822	-1.21236	-1.06371	-0.579705	-0.520322	-0.675675
20345	KIAA1840	H200009390	0.96861	0.248341	0.826695	2.16329	2.19184	1.37066	0.428586	0.34733	0.58819	-1.44229	-0.7072	-1.44693	0.555906	0.304284	0.779913	-1.05557	-0.737622	-0.875992	-0.857756	-0.314434	-1.0622	-0.698536	-0.932727	-0.876481	-0.032472	0.318494	-0.051935
31811	SRMS	H300004474	-0.256986	0.483751	0.11908	-2.09104	-1.91595	-2.24178	0.16548	0.430291	0.0810902	1.21479	1.45449	1.39188	0.644364	0.945494	0.845382	0.617296	1.0183	0.969304	0.0987764	-0.136945	-0.742442	-0.255622	-0.851927	-0.512557	-0.214667	-0.715111	-0.544742
10650	ARHGEF10	opHsV0400000299	0.576907	-0.570306	-2.09842	0.959455	-0.329975	-0.505913	-0.265247	0.00648158	-0.211095	0.540757	1.77728	1.11055	2.27298	0.295861	1.15389	0.90716	0.136125	0.648475	0.0501762	-0.00820015	-0.818233	-0.476334	-0.638233	-0.465241	-1.43682	-1.24408	-1.36799
9311	opHsV04NC000001	opHsV04NC000001	0.358457	-0.620006	0.176582	0.107933	1.01862	0.0954262	0.291505	-0.177373	0.231434	1.6056	1.08379	0.959841	1.40027	1.55302	1.535	-0.0179914	-0.114027	-0.940446	-0.157046	-0.23802	-0.574442	-0.502342	-1.56283	-0.78615	-2.21436	-0.988405	-1.52403
20553	KLRA1	H200007417	0.361745	-0.635134	-1.04037	0.519231	0.701992	1.51178	0.122838	0.43094	0.894698	0.844088	0.827537	0.708964	0.640688	1.35071	0.939711	-0.102465	0.392672	0.475762	-2.29039	0.420684	-2.14494	-0.599849	-1.59878	-0.968133	-0.510735	-0.660561	-0.592687
32740	TICAM1	H200003914	-0.55081	0.957332	0.42874	0.705725	0.447575	-1.13356	-0.150786	-0.931448	0.782881	-0.744078	-0.500691	-1.05417	0.156089	-1.81248	-0.0541001	-0.996315	-1.33874	-1.83034	1.6769	0.494919	1.86969	-0.0598228	1.24068	0.668239	0.627576	0.870421	0.230567
26946	PRKAR1B	H300004439	0.295346	0.671431	-1.54099	-0.786487	0.549122	0.822198	-0.43419	-0.379222	-2.13673	0.440491	0.954807	0.959488	0.783965	0.494502	0.337885	1.99228	0.889808	2.10784	-0.526741	-0.466756	-0.444293	-0.82032	-1.02313	-0.651711	-0.815622	-0.832816	-0.440152
33778	TTTY14	opHsV0400002292	-0.422781	1.53123	-2.01009	-1.5899	-1.5992	-0.964489	-0.358206	-0.939512	-0.11563	1.43713	1.32018	1.18086	0.951765	0.925903	0.843526	0.933823	0.574589	0.654227	0.173333	0.614576	-0.975968	-0.189228	-1.01387	-0.799655	0.0430729	-0.0690696	-0.136602
25244	OR52L1	H300008616	-0.357905	0.783763	-0.494693	-1.3871	-1.1033	-1.75905	-0.80592	-0.768602	-1.98959	1.25391	0.484793	0.750481	0.819123	2.46457	1.33915	0.23722	0.257166	0.336018	-0.220655	-1.0907	-0.372436	0.449489	-0.19095	0.83045	0.264197	0.0284933	0.242068
17518	GADD45GIP1	H300000396	-1.10462	0.578964	-1.89097	-1.91206	-0.661226	-0.839887	-0.365717	0.0580079	-0.184655	0.540429	1.57793	2.35879	1.86062	0.886719	0.273038	0.583292	0.212701	0.580012	-0.190498	0.21335	-1.22135	0.426282	-0.363643	-0.196721	-0.2969	-0.274702	-0.647201
27672	Q5VZ27_HUMAN	H300009559	0.346266	0.101907	0.978191	2.85784	2.22922	1.99647	-0.0763524	-0.0431837	-0.0388455	0.0821448	-0.187533	-0.518588	-0.0748049	0.222552	0.0232416	-0.217833	-0.241441	-0.0536867	-0.5128	-0.138762	-0.905458	-1.56367	-1.021	-1.06375	-0.710742	-0.743889	-0.725484
738	H300001856	H300001856	-0.0882753	1.30779	-2.22796	-0.378643	-0.261125	0.112777	-0.456065	-0.495923	-0.120585	0.317768	0.947451	1.35674	0.787964	1.87966	0.744723	0.839592	0.976501	1.0378	0.284934	0.612039	-1.50671	-0.667251	-1.31048	-1.10049	-0.897308	-0.829156	-0.865763
470	H200017429	H200017429	0.155126	-0.196988	0.916192	-0.508611	-0.0663647	0.0534905	0.70853	0.131197	0.558599	-0.867228	-1.24204	-0.983357	-0.712745	-1.11226	-2.91213	0.0620012	-0.391961	-0.482622	2.22074	-0.764877	1.02596	0.859475	1.03189	0.943368	0.62252	0.378091	0.574012
10838	ASH2L	H200001319	0.832171	-0.0695266	0.45784	1.76153	1.44284	3.20408	-0.0787859	0.596198	0.796027	0.146165	-1.47768	-1.30393	-0.32873	-0.373329	-0.692528	-0.828805	-0.895463	-0.344342	-0.939396	-1.11068	0.113824	-0.405758	-0.0939608	-0.292042	0.0331202	-0.0137247	-0.135123
29116	RAC2	H200009978	-0.703302	0.238098	2.58758	0.523552	0.682737	1.02359	0.147005	-0.345356	0.264391	-1.80633	-1.75234	-1.0351	-1.17016	-1.99151	-1.1032	-0.108658	0.0716261	-0.240897	0.691049	0.686343	0.630814	0.308862	0.341572	0.535511	0.688502	0.254242	0.581372
33222	TNK2	H300016373	-1.38285	0.362351	-0.0488134	-1.28552	-1.09958	-1.30247	-0.428993	-0.48357	-0.209357	0.89593	1.49044	2.04063	2.05381	1.95708	0.861244	-0.00695038	-0.500433	0.207172	0.623577	-0.112851	-0.907165	-0.0549438	-0.529105	-0.514581	-0.462194	-0.564958	-0.597895
18590	HERC5	H200003668	1.36931	0.211053	2.05197	-0.859684	0.413843	0.102678	0.947302	0.707847	0.823705	-1.3608	-2.01895	-1.78901	-1.21766	-1.18642	-0.873315	-0.427125	0.0704102	-0.220376	0.0264067	0.725272	1.20431	-0.00669704	0.501494	0.272668	0.565481	0.767809	-0.801525
12527	C3orf17	H200006497	0.978047	0.187002	0.337523	1.58916	2.312	2.08322	0.650683	0.375177	0.622474	-0.811493	-0.40175	-1.24885	0.187243	-0.0768634	-0.0857174	-0.970457	-0.860242	-0.539885	0.0691179	-0.601313	-0.989629	1.49254	-0.715613	-0.952596	-0.95853	-0.728581	-0.942672
59	AF191028_90	AF191028_90	0.579202	0.763325	0.50173	0.43619	0.714835	0.454203	-0.158542	0.494541	0.485335	-1.67042	-1.91623	-1.70597	-1.92148	-1.98409	-1.58882	0.543258	0.578545	0.532032	0.581731	0.548625	0.24703	1.02468	0.559944	0.486597	0.40916	0.557386	0.447209
31496	SNW1	H200006602	1.06937	0.119592	0.198053	2.08092	2.45001	1.97442	0.363906	0.405443	0.45523	-0.642821	-1.30663	-1.5401	0.297158	-0.467666	0.210267	-0.180149	-0.0133578	-0.35774	-0.45206	-0.655034	-1.23162	-1.07756	-0.749023	-0.8503	-0.145209	0.494617	-0.449716
29846	RPL29	H300003989	0.813416	0.328161	-2.23579	-0.501341	-0.501311	-0.126449	-1.14471	-1.82964	-1.19871	0.294121	1.55856	1.77866	0.930317	1.11297	0.28558	1.2409	0.744824	0.906872	0.379196	-0.166189	0.140527	-0.163335	-0.278774	-0.33684	-0.295123	-1.51356	-0.222332
5937	opHsV0400009857	opHsV0400009857	-0.919281	0.141123	-1.05269	-0.627647	-1.4973	-1.52082	-0.265461	-2.22457	-0.161182	1.40165	0.77705	2.28752	-0.499484	1.13338	0.238744	1.01974	0.480935	0.845709	-0.181152	-0.373126	-0.554567	0.982024	-0.345691	-0.483284	0.685705	0.098262	0.614422
30349	SDCCAG8	H300022258	-1.42667	1.25272	-0.53149	-0.914069	-1.13316	-0.456583	-0.860359	-1.44737	-0.271549	0.919532	1.80028	1.4126	0.188066	0.786019	0.378515	1.3095	0.981956	1.24468	0.872396	0.414609	-1.21584	-0.638204	-1.20343	-1.20851	-0.076764	-0.189557	0.0126784
17212	FLT4	H200005910	0.0744421	-0.328007	-0.149354	-0.603388	-2.35773	-1.20818	-0.235295	-0.834529	-0.872246	1.13628	1.43811	1.70842	1.42155	1.11338	0.677598	-0.661697	0.675131	1.30224	-0.463752	-0.705775	-1.28752	0.222587	0.0356572	-0.431777	1.03107	0.135093	-0.83232
21259	LOC651271	H300006348	1.00643	0.626729	-0.265414	1.83294	1.7019	1.70386	0.23027	0.532087	0.623923	-0.793177	-0.583964	-0.558437	0.486053	-0.219265	0.65548	0.167605	0.359637	0.332259	-0.596676	0.761562	-2.08976	-1.3051	-1.46451	-1.52833	-0.613597	-0.569733	-0.432774
7796	opHsV0400011979	opHsV0400011979	-0.11835	1.35395	-2.25959	-0.182718	-0.877518	-1.63349	-0.141182	-0.186354	0.418535	1.5243	1.5937	1.36577	0.662063	0.0879753	0.364472	1.08367	1.20374	1.19524	-0.400475	-0.892635	-0.311187	-0.578979	-0.298523	-0.396501	-0.768514	-1.15511	-0.652303
22209	MLF2	H200006610	-0.21672	0.605449	-0.41192	1.46924	1.69888	1.48664	0.203203	-0.704447	0.179055	-1.79517	-1.1111	-1.01122	-0.795361	-2.23721	-1.6154	-0.321696	0.305595	-0.556775	0.816657	0.670741	0.299435	-0.10362	0.605158	0.383549	0.82997	0.834486	0.492583
8151	opHsV0400012359	opHsV0400012359	-1.08913	-0.508876	-0.694791	-2.2163	-0.958198	-1.23894	-0.184898	-0.514193	0.272415	1.68007	1.70128	1.78077	1.34274	0.456017	1.22128	0.270541	0.34514	-0.276944	-1.15554	-0.08503	-0.317508	-0.0940257	-0.727079	-0.76858	0.601429	0.391443	0.766892
26881	PRAP1	H200002520	-0.668856	-0.185311	0.553651	0.930322	0.624559	1.91495	0.465924	0.0188954	1.07853	-2.07149	-0.670755	-0.852365	-0.26052	-1.05772	-2.7875	-0.00518022	-0.511371	-0.925163	0.162683	1.13226	0.261592	0.685047	-0.159386	0.845935	0.464756	0.66138	0.355126
14485	CORO1C	H200002647	-0.073071	-0.0194234	0.641277	2.33109	2.46082	1.25871	0.474691	0.596409	0.846205	-1.10926	-1.47352	-1.33436	-0.808125	-0.760508	-0.361831	-0.58422	-0.300899	-0.408603	0.169227	1.39427	-0.866308	-0.548413	-0.886314	-0.502321	-0.0232983	-0.0565416	-0.0556967
16709	FAM24A	opHsV0400007072	-0.4464	-2.56414	-0.887857	-0.376303	-1.30386	-0.938217	-0.665841	-0.946011	0.049768	1.15304	1.52794	1.32168	-0.369105	1.75148	0.0433615	1.60528	0.963349	-0.247779	0.513155	-0.242673	0.0748289	-1.16138	0.242406	-0.174271	0.453149	0.425757	0.198636
222	H200004504	H200004504	2.0066	0.780358	-0.256372	1.4757	1.15523	2.08286	0.117485	-0.10337	0.72445	-0.364403	-0.459858	-0.44415	-0.935767	-1.83043	-1.19472	-1.78209	-1.17509	0.332415	0.41036	0.661234	0.770927	-0.551358	-0.112303	-0.499954	-0.16213	-0.189557	-0.456074
19945	KARS	H200000738	0.0456873	0.305738	0.320498	2.95322	2.10639	2.16872	0.441134	0.262037	0.533099	0.468266	-0.465469	-0.856152	-0.406112	-0.779822	-0.684691	-0.710663	-0.451685	-0.339191	-0.597432	-0.615591	-1.39474	-0.540692	-0.697179	-0.752326	-0.162778	0.141956	-0.292223
14459	COPB2	opHsV0400002563	1.43826	0.01214	-0.11591	2.73768	2.18433	1.92047	0.421664	0.256573	0.0411851	-0.231123	-0.319347	-0.868367	0.36412	-0.401075	-0.395556	-0.194982	0.1157	-0.682059	-0.761704	0.0872653	-0.516001	-0.489943	-0.523507	-0.734498	-1.13347	-0.786886	-1.42496
20795	LARP4	H300022346	1.09625	0.284168	0.805167	2.20676	2.13794	1.66657	0.747327	-0.154127	-0.0709239	-1.39396	-1.36388	-1.63476	-0.434271	-0.0254473	-0.045019	-0.658967	-0.574894	-0.619956	-0.636068	-0.635002	0.125364	1.27126	-0.199433	-0.704106	-0.393694	-0.380633	-0.415661
28714	Q9H378_HUMAN	H300003152	1.24613	-0.291801	0.574433	2.22429	1.90185	1.91258	0.772644	0.558444	0.231097	-0.647584	-0.96638	-2.08049	0.126124	-0.156142	0.241325	-0.228218	0.0132473	-0.389474	-1.63242	0.255957	-0.320229	-0.212589	-0.65017	-0.583249	-0.70336	-0.519601	-0.676421
6766	opHsV0400010829	opHsV0400010829	2.72056	1.68571	-0.696376	1.52585	0.708586	1.43765	0.525706	0.583116	0.330285	-0.835873	-0.090515	-1.14242	0.76583	0.119273	0.224588	-0.570378	-0.0881302	-0.699542	-0.0661633	-0.476258	-1.12913	-1.44453	-0.619215	-0.465269	-0.724305	-0.473496	-1.10554
22360	MPG	H200006692	-0.966172	0.332786	-0.185254	-1.76681	-1.90652	-1.31668	-1.05101	-1.69204	-0.130165	0.651595	1.55366	1.50298	0.122056	-0.0459914	0.414742	0.905043	0.588734	1.14096	1.53346	-1.22118	-0.0783242	0.673497	-0.00138021	0.545731	0.170589	0.25059	-0.0248805
17446	FYTTD1	H200008268	1.05556	0.496978	-0.024417	1.04938	1.89097	2.49321	0.729436	0.526355	0.757117	-0.731312	-1.03692	-1.67829	-0.0177586	-1.12851	-0.204647	-0.569683	-0.0719621	-0.578078	-0.44278	1.608	-1.09679	-0.556517	0.0490975	-0.620897	-0.56381	-0.483999	-0.849745
34545	WDR41	H200002578	0.569534	-0.306204	0.31226	1.14791	1.03947	1.07166	0.664886	0.323747	0.47956	-1.36819	-1.34611	-2.17248	-0.964463	-1.76198	-1.16884	-0.147911	0.167282	-0.343273	-0.53158	-1.15038	0.955301	1.55549	1.05232	0.801459	0.288239	0.604934	0.227368
33382	TRABD	H200004214	-1.14004	-0.336771	0.290953	-1.68088	-1.92513	-2.55512	0.154906	-0.019134	0.105683	1.21802	0.980887	1.11553	1.15233	1.40517	1.16455	0.364751	0.588657	0.552048	-0.740788	0.29356	-1.12224	0.0329729	-0.356796	-0.269057	0.279436	0.205203	0.241303
16223	ELP3	H300016850	-0.850852	-0.20873	0.659261	1.70267	2.24263	1.97626	0.121098	0.657694	0.479906	-0.951362	-1.51498	-1.2566	-0.779009	-0.437516	-0.135867	-1.19268	-1.2751	-1.16547	0.201918	-0.276678	0.672974	-0.583403	-0.018453	-0.0226219	0.740861	0.399366	0.814683
14692	CRYAA	H200014251	0.496847	0.751599	-1.17045	-2.67336	-2.05747	-1.64083	-0.325549	-1.67988	-0.695035	0.60905	0.880847	0.670805	0.25466	0.243832	0.617925	0.778314	1.08844	0.801756	0.477108	0.0929037	-0.347809	0.551796	0.375162	0.415188	0.726704	0.312387	0.445065
26723	PPIE	H200004226	0.299403	0.388205	0.554824	1.04845	1.12689	0.688528	0.413737	0.348787	0.579675	-1.78662	-1.47942	-1.12105	-2.14547	-2.01256	-1.86966	0.490659	0.23512	0.600375	-0.105366	-0.160894	0.600381	0.946099	0.21683	0.506885	0.675065	0.374198	0.586939
33366	TPRXL	H300008950	-1.13221	-1.26938	-0.566906	-1.69905	-1.14753	-1.3577	-0.216096	0.229217	-0.331362	1.27787	1.57694	0.955488	1.40066	0.629605	0.713171	0.631558	0.320617	0.787653	1.1773	-2.13955	-0.309817	0.811065	0.498126	0.301043	-0.380441	-0.285785	-0.474487
29895	RPP38	H200010679	0.51172	-0.364985	0.897382	1.54655	1.35333	1.667	-0.374004	0.906303	0.537403	-1.65717	-2.10827	-1.81713	-1.47191	-0.778808	-1.24968	-0.188139	0.549557	-0.0317424	-0.13068	-0.444679	0.447591	0.197501	0.262406	0.173902	0.527475	0.44918	0.589893
14749	CSHL1	H300014950	0.840604	0.434911	1.89364	-0.147762	-0.749927	-0.0845477	0.165058	-0.527616	0.0929395	0.20104	1.70855	0.894565	1.35187	0.203559	0.281699	0.944568	-0.0974985	1.3008	0.303153	-2.30389	-0.540551	-0.836998	-1.46954	-0.862757	-0.89105	-1.10368	-1.00113
26716	PPIA_HUMAN	opHsV0400002281	-0.0806784	0.156604	1.1218	1.90557	2.1815	2.43159	0.0765471	0.0617232	-0.0434597	0.0733118	0.347395	-0.334405	0.417844	-0.0658255	-0.00293704	-0.122709	-0.0884165	-0.00378679	-0.411984	-0.00361227	-0.950369	-1.65798	-1.53096	-1.48644	-0.915897	-0.824602	-0.249817
30369	SEC11C	H200005653	-0.334564	1.18656	1.15578	1.65996	1.26792	1.16558	0.319372	0.295987	0.538347	-1.52789	-1.12144	-0.86093	-1.32257	-2.0493	-1.883	0.0844723	0.262759	-0.0380092	1.17399	-0.721486	0.76007	0.262424	0.253854	0.234041	-0.247145	0.0422964	-0.55709
19688	IPO13	opHsV0400006267	-0.636416	-0.103326	0.599626	1.39913	1.50327	1.51649	0.466392	0.799694	0.635344	-1.63534	-1.54158	-0.943025	-1.59613	-2.33273	-1.3197	-0.0134764	0.0405278	0.408051	-0.0840078	0.632707	0.424545	-0.266286	0.260383	0.291896	0.660689	0.337712	0.495556
29090	RAB8B	H300014504	0.393297	1.23797	0.742463	1.41818	0.982598	2.23563	0.59977	0.457831	1.05566	-0.851211	-0.874608	-1.37596	-0.190101	-1.03184	-0.30875	0.279534	0.621117	-0.214931	-0.322206	1.37855	-1.47266	-1.03228	-1.09256	-1.43598	-0.251645	-0.414268	-0.53358
35673	ZNF764	H200013003	-1.09856	0.566584	-0.913465	-1.4951	-1.70804	0.0237899	-0.14661	-1.26521	0.185514	0.920463	1.53484	0.812603	1.86209	1.30351	0.627398	0.391213	1.61545	-0.0485297	0.396746	-0.762851	-1.89573	0.158434	-0.0219754	-0.30322	-0.194675	-0.306895	-0.237781
15369	DERA	H200003391	-0.571445	0.150282	0.685217	2.18956	2.18246	2.17675	0.139565	0.44731	0.502755	-0.995139	-1.91864	-1.7761	-0.748051	-0.593363	-0.405391	-0.511744	-0.56148	-0.438548	-0.0612267	0.800979	-0.213939	-0.032797	-0.164458	-0.0375375	-0.0624119	-0.111473	-0.0711409
27155	PSL1_HUMAN	H300022810	-1.33747	0.264357	-0.768524	-0.425353	-0.51329	-0.568575	-0.493043	-0.468222	-0.329215	1.21287	1.99236	2.13732	1.76241	2.22359	0.61413	-0.0828877	-0.330366	-0.378065	0.320607	-1.19325	-0.352155	-0.667725	-0.440256	-0.426371	-0.613624	-0.470956	-0.668297
29780	RP2	H200004729	1.28228	-0.0489885	1.72599	1.68159	1.99356	1.46436	0.174546	0.541708	0.335167	-0.800868	0.443989	0.461406	-1.03446	0.017163	-0.872057	-0.8905	-1.05404	-0.993179	-2.00156	0.524481	-0.0772801	-0.274429	-0.700748	-0.0466564	-0.283064	-0.947084	-0.621324
16714	FAM26B	H200015763	-0.0159117	-0.758262	-1.79987	0.438347	0.753706	1.29308	-0.959818	-1.36967	-0.67366	-0.527347	-1.29935	-0.0924452	-0.370035	-1.33925	-0.692275	-0.390374	-0.398138	-0.804405	0.564187	0.908801	1.83095	1.11608	1.5058	1.16133	1.01133	0.0254527	0.881754
3327	opHsV0400005392	opHsV0400005392	-1.40015	-0.476377	0.111345	-2.10713	-1.51883	-2.08497	-0.336297	-0.613496	-0.724717	0.948328	-0.367266	0.661494	0.495136	0.624819	1.13512	0.818407	0.00620758	0.387029	-0.918888	-0.264774	0.7421	1.85176	0.525481	1.26658	0.452336	0.699583	0.0871648
30169	SAMD4A	H300019191	-0.196271	-0.415831	-0.248007	-2.37928	-2.47987	-2.02077	-0.245814	-0.357338	-0.269428	-0.203694	0.321782	0.42906	-0.489806	-0.262821	-0.501503	0.959085	0.534706	0.837588	1.54985	0.497135	0.678879	0.250432	0.310726	0.796883	1.08309	0.770278	1.05094
8927	opHsV0400013212	opHsV0400013212	0.126215	0.781576	-0.756847	-2.96226	-0.120489	-0.858789	-0.87097	-1.18858	-1.68618	1.06694	0.916575	1.34094	0.697878	0.334142	0.737568	0.76306	1.60452	0.80477	0.370392	0.458465	-0.574744	-0.573319	-0.283984	-0.213454	0.356509	-0.480664	0.210721
31111	SLC35E2	opHsV0400000122	-0.296184	0.200203	-0.308831	-2.71563	-2.1986	-2.61629	-0.372837	-0.606157	-0.238401	0.762031	0.862125	1.26223	0.491994	0.579766	0.186903	0.0214976	0.255347	0.261567	0.89698	0.451445	0.3744	0.504956	0.505048	0.637106	0.264944	0.336794	0.497586
31062	SLC2A8	H200001919	-1.37103	-0.268253	-0.550437	-1.7314	-2.10006	-2.41261	-1.41041	0.0985541	0.609712	0.76364	1.10189	0.864492	0.222938	0.556323	-0.0992989	0.520641	0.0433846	1.08668	0.609585	1.53652	-0.159479	0.116226	0.275923	0.677874	0.628763	0.195819	0.194019
764	H300002197	H300002197	0.336689	0.523556	1.02534	2.12148	1.77617	1.80508	0.206104	0.487564	0.591833	-0.933871	-1.6293	-1.07272	-0.658874	-0.606736	-0.570443	-0.399827	-0.397237	-0.113623	-1.80768	1.46961	-0.593727	-0.762332	-0.582618	-0.354617	0.108696	-0.130234	0.161712
18193	GRAMD2	H200011930	-0.883924	0.260369	-0.562342	-2.55321	-2.05058	-2.15181	-0.177833	-0.0769627	0.103813	1.12696	1.00509	1.48377	0.914136	1.70806	0.744414	0.20645	0.219732	0.343073	0.603464	0.0262811	-0.0884142	0.0193168	-0.0711765	-0.193099	0.124664	-0.0545225	-0.0257245
35130	ZNF18	H300020576	-0.79638	-0.938226	0.157909	1.04714	0.294229	1.01315	0.837513	0.204723	0.638706	-0.470198	-1.29822	-1.47254	-1.81864	-1.9735	-0.957918	0.26324	-0.807745	-0.330831	-0.615308	1.17732	1.05322	-0.169349	0.963621	0.710105	0.996079	0.901038	1.39085
13737	CDKN2AIP	H200004185	-0.149702	0.0103259	1.6375	2.735	2.092	2.03538	0.198727	0.00765493	0.219074	-0.291558	-0.565855	-0.822039	-0.320691	-1.0221	-0.556499	-0.984242	-0.967471	-1.09047	0.0357516	0.469497	-0.290667	-0.550033	-0.534285	-0.714658	-0.0670899	-0.123108	-0.390444
10546	APOLD1	H200008790	1.03808	0.332944	-0.439644	2.58805	2.50691	1.39154	0.822729	0.291028	0.277818	-0.539966	-1.19368	-1.82313	0.133346	-0.851412	-0.279328	-0.759427	-0.685176	-0.563398	0.252876	-0.0746097	-0.654308	-0.383269	-0.184928	-0.301142	-0.736686	0.311225	-0.476438
9595	ABHD7	H300009194	1.27613	0.979707	0.439613	0.717362	0.880867	0.453149	1.71612	0.972237	1.17511	-0.0214545	-0.382253	-2.20501	0.827387	-0.15317	0.313999	-0.13556	0.374853	-0.229946	0.579203	-0.800316	-0.574816	-1.82864	-1.73747	-1.50632	-0.228864	-0.567172	-0.334739
30449	SENP6	H200003745	2.12065	0.607606	-0.45549	2.00157	0.589775	1.4404	0.93452	0.334954	0.906129	-1.50606	-0.265068	-1.49086	-0.0277673	-0.429992	0.0903357	-1.28725	-0.679601	-1.6322	0.0625631	-1.54759	0.479446	-0.231815	0.0192817	-0.470906	-0.0727391	0.492487	0.0176181
26771	PPP1R13B	H200001170	-0.0925838	0.327028	0.0035407	0.0203252	1.1126	0.941131	0.245372	0.777958	-0.277212	0.747079	0.766818	0.591784	0.544914	-0.0118196	0.275607	0.965823	1.40201	0.662069	0.14521	1.17813	-1.85807	-0.990423	-2.06128	-1.75241	-0.894477	-1.47296	-1.29616
27132	PSEN1	H300019634	-0.955335	-0.403733	0.984165	2.33075	1.80178	2.05608	0.2616	0.557515	0.503633	-0.818999	-1.46876	-1.35413	-1.17271	-1.41616	-0.516729	-0.532561	-0.613803	-0.641321	-0.439436	0.444798	0.134055	-0.0262494	0.120927	0.0276727	0.516382	0.0352806	0.585291
17119	FGFR1OP	H300011961	0.0246815	0.329349	-0.292341	-1.89959	-1.44625	-2.18447	-0.860362	-1.01024	-0.984023	0.446724	0.878432	1.26173	0.902609	1.44356	0.599612	0.607662	0.403933	0.920774	2.01849	-0.73067	-0.820024	0.243408	-0.134607	0.131025	0.035074	0.15716	-0.0416403
23245	NKTR	H200015751	1.4432	0.521118	0.423365	1.7571	1.19729	1.92146	-0.0267746	-0.041872	0.699064	-2.03487	-1.44283	-2.33686	-0.527334	0.345653	-0.625058	-1.01841	0.204347	-0.530426	-0.335249	-0.0364864	-0.269537	-0.30119	-0.0917004	-0.0699484	0.189198	0.735638	0.251106
18637	HIATL1	H300020390	-0.21786	0.0986344	1.13523	2.25539	1.3927	2.56275	0.44787	0.208462	0.560002	-0.656411	-0.758376	-1.2325	-0.792269	-1.71103	-0.708648	-0.532254	-0.646284	-0.253367	-1.03852	1.06494	-0.45636	-0.599254	-0.103437	-0.497425	0.145366	0.0248963	0.307769
2774	opHsV0400003615	opHsV0400003615	-1.46169	-0.653549	0.451994	-1.57577	-2.10901	-0.946206	-0.769092	-0.868517	-0.353241	0.687207	1.22448	1.91863	1.33718	2.05572	0.741076	-0.20394	0.0283476	-0.268661	0.7451	-0.8604	-0.0601748	0.282273	0.168177	0.432348	-0.0571103	0.037299	0.0775253
14828	CTDSPL2	opHsV0400006313	1.56157	-0.543523	0.104496	1.72825	0.746656	2.16912	0.0206385	0.892888	-0.305564	0.507306	-0.0157477	-0.424975	0.678738	1.06359	1.02178	0.0439872	-0.13221	-0.235565	-0.550797	-2.19082	-1.17759	-0.831729	-0.500046	-1.16148	-1.11682	-0.567591	-0.78456
13715	CDK5	H300020971	0.170251	0.230261	1.2617	2.6546	1.61419	1.70997	0.430691	0.706069	0.350126	-0.0819818	-1.72175	-0.447156	0.179941	-0.244702	-0.387718	-0.270264	-0.815422	-0.132039	-1.97335	0.602808	-0.978869	-0.64227	-0.464914	-0.657091	-0.300802	-0.61235	-0.179917
27197	PSMD2	opHsV04TC000022	0.622331	0.20909	1.53593	1.354	1.15034	1.07519	0.863865	1.06417	0.907209	-0.0984905	-1.79005	-1.30789	-1.39512	-1.6024	-1.4735	0.596866	0.16528	0.264655	-0.489657	0.398616	0.0565848	-1.2421	-1.03199	-0.847432	0.401285	0.140488	0.472727
29610	RIOK3	H200015047	-0.173779	0.766547	0.539017	2.43909	1.88727	2.02058	0.28135	0.574332	0.74486	0.011398	-0.88547	-1.52831	-0.0567405	-1.69812	-0.671079	-0.135401	-0.19506	-0.420687	-0.144467	0.976125	-0.395139	-0.75805	-0.865183	-0.679698	-0.631833	-0.38263	-0.618918
5181	opHsV0400008932	opHsV0400008932	1.64139	-0.4044	1.25308	1.12366	2.85004	1.40669	0.223328	0.786245	0.168521	-0.951556	-0.710542	-1.38236	-0.315059	0.252799	0.182313	-1.14703	-0.912668	-0.768364	-0.255018	-0.742974	-0.54767	-0.212243	-0.751044	-1.27551	0.0535327	0.264115	0.170728
31703	SPHK1	H200005643	-0.645111	-0.417269	0.0210883	-1.61005	-1.35722	-1.41161	-0.760839	-0.623523	-0.657871	1.1927	1.56886	1.56739	1.94194	1.54946	1.85074	-0.709084	-0.268318	-0.362911	-0.113882	0.225834	-0.144397	-0.184048	-0.14459	0.318281	0.130729	-0.811651	-0.144635
24664	NSG2_HUMAN	H200005717	0.568938	0.905805	0.281577	0.390536	0.48829	0.228427	1.06279	0.683597	0.67825	-1.91665	-1.92419	-1.81383	-1.74178	-1.71175	-1.6641	0.700044	0.359776	0.591638	0.603887	0.167111	0.471626	0.550429	0.443652	0.412885	0.244797	0.221663	0.716583
16425	ERVK6	opHsV0400005068	1.28329	-0.286166	-0.212571	0.0630544	0.340162	0.4023	0.393026	-0.101133	1.52841	-1.42779	-1.43451	-1.54119	-1.16776	-0.544588	-0.721317	-1.04417	-0.649841	-0.53613	-1.76169	1.01972	0.777768	0.442832	1.29584	0.490019	1.56796	0.962537	0.861924
26033	PGAM1	opHsV0400008746	1.02934	0.284922	-0.788596	0.667837	0.659805	0.718771	-0.338127	-0.697184	0.0688816	0.304202	0.677089	0.576186	0.310737	0.411334	-0.333207	1.36862	1.9275	1.7646	-0.648068	0.298602	-1.43054	-0.787933	-0.815013	-0.778387	-0.959947	-2.38178	-1.10965
17513	GAD2	H200007949	-1.98511	1.00905	-1.55516	-1.32372	-1.51713	-1.28263	-0.27041	-0.503319	-0.275205	1.06962	0.623733	1.28363	0.0663535	1.40057	1.14376	0.491684	1.13492	0.929664	0.596378	-1.42097	0.408194	-0.37945	-0.636494	-0.0729076	0.716563	0.208316	0.140077
34752	XRCC4	H200013731	1.07796	0.755344	1.62044	1.95564	1.67663	1.6977	0.315816	-0.314833	0.205025	-0.666952	-1.06615	-0.830773	-0.0653725	0.152811	0.0359765	-1.98317	-0.783195	-0.812347	0.419877	0.486432	-0.381957	-0.91306	-1.27469	-0.895917	-0.119335	0.353659	-0.645556
4581	opHsV0400008128	opHsV0400008128	0.927323	0.287645	1.11159	-0.296108	0.785274	1.15117	0.682082	-0.460679	2.04881	-0.93088	-1.49572	-0.877641	-0.347275	-1.0713	-1.59719	-1.05724	0.193402	-1.74504	0.29446	0.8912	0.386092	1.2669	-0.454256	-0.86975	-0.272538	1.1125	0.337169
27562	Q5H9U9_HUMAN	H300005208	1.20926	-0.133914	1.84065	1.27553	1.28536	0.737844	0.370327	0.203699	0.645485	-1.30296	-1.98425	-2.80535	0.126952	-0.539139	-0.163188	-0.417367	-0.547435	-0.719599	-0.698031	0.40176	0.959147	-0.353122	0.0656858	-0.0101322	0.327531	-0.0493606	0.27462
35549	ZNF610	opHsV0400001203	-0.0891	-1.67568	-0.909628	-0.368181	0.126935	0.49069	-0.516301	0.541878	0.461844	1.26221	0.4388	0.703932	0.68309	0.379663	0.816027	1.74012	1.98109	0.718408	-2.14318	0.536105	-0.721946	-1.06405	-0.966411	0.332519	-1.09909	-0.822478	-0.837272
15066	CYP27B1	H200014851	0.570983	0.559524	1.84589	0.700442	0.82465	1.27055	1.35712	0.617519	1.27426	-0.354007	-0.615079	-0.42444	-0.180379	0.44501	0.0242705	-0.660348	-0.643338	-0.715018	0.317016	1.81421	-1.07535	-1.25995	-1.53504	-1.37999	-0.83445	-1.14979	-0.794277
23529	NP_001010845.1	H300000050	-0.296055	0.0338319	-1.42969	0.33287	0.0403166	-0.312924	-1.16243	-0.661525	-0.469912	2.55657	0.937724	1.17658	0.746492	2.45289	0.329892	0.716913	0.313139	-0.0977473	0.12005	-0.382506	-1.04546	0.210014	-0.621608	-0.430839	-0.412305	-1.38222	-1.26206
32749	TIGD5	H200005747	-0.537426	-1.88545	-0.465766	-0.0648026	-0.964613	-1.50528	-0.115392	-0.418202	-0.0635577	1.32261	1.67438	1.96269	1.20708	2.3528	1.07963	-0.0823744	-0.075424	-0.449316	0.118147	-0.923853	-0.421142	-0.0303183	-0.13476	-0.315859	-0.383568	-0.25213	-0.628107
16133	EIF3S12	H200017816	-0.949648	0.587628	0.594251	2.47688	2.29453	1.88743	0.531933	0.600033	0.747053	-0.793878	-1.37495	-1.45927	-0.211169	-0.907621	-0.520349	-0.424836	-0.555027	-0.43903	-0.0418886	-0.357946	-0.670885	-0.590015	-0.539242	-0.609453	0.246115	0.234674	0.244684
29900	RPRML	opHsV0400001237	-0.621156	1.08694	-1.01573	-2.01948	-1.83105	-2.52414	-0.315511	-0.54344	-0.305675	1.02455	0.683413	1.41377	1.51541	1.07675	0.416827	0.578905	0.356588	0.707369	0.83365	-0.00892456	-0.274235	-0.11611	-0.362769	-0.0298047	0.215466	-0.109137	0.167528
19301	IFI16	H300020876	0.413932	0.0804066	-0.0978278	2.43832	2.20204	1.64568	-0.0120883	0.228482	0.0964931	-1.20151	-1.26198	-0.526419	-1.62794	-1.58257	-1.71184	-0.35848	-0.198929	-0.15549	0.191708	0.646547	0.168519	0.0525306	0.0474831	-0.130644	0.223687	0.285252	0.144621
20138	KIAA0090	H300016514	0.78583	-0.395069	0.759823	1.92134	1.92472	2.10334	0.535588	0.940472	0.583176	-0.507435	-0.864307	-0.350543	-0.0851817	0.350586	0.145052	-1.66795	-1.2018	-0.671648	-1.02137	1.07289	-0.373758	-0.922004	-1.03585	-0.555316	-0.30726	-0.693171	-0.470169
2346	opHsV0400001953	opHsV0400001953	0.12559	0.252516	1.18591	2.154	1.58525	2.96455	0.148653	0.232901	0.240321	-0.205244	-0.216028	-0.9958	0.251087	-0.926749	-0.266741	-0.378605	-0.0221083	0.245271	-0.249721	0.0313083	-0.779033	-1.40053	-1.06867	-1.11423	-0.432914	-0.807697	-0.553294
27616	Q5T2Z8_HUMAN	H300004861	-0.890066	0.194913	-0.512152	-2.40119	-1.70302	-2.7374	-0.174987	-0.584585	-0.273767	1.28046	0.590027	0.987735	-0.036255	0.349638	0.587617	0.959018	0.417572	0.471052	1.05834	-0.492089	0.184788	0.525786	0.695885	0.686754	-0.404122	0.51957	0.700485
23161	NFIC	H300016546	-1.36785	-0.541795	-2.398	-0.990771	-0.127445	-0.468398	0.0312492	-0.289251	-0.986573	0.650075	0.00190208	0.545939	-1.26108	-0.0711576	-1.17297	0.176475	-0.301395	0.0236945	1.49748	-0.810537	1.45795	0.814837	1.13775	1.21856	1.22294	0.918609	1.08978
16507	EXOC3L	H300022689	-0.339417	0.307393	-1.39438	-2.33659	-1.86223	-0.625694	0.592987	-2.06543	-1.36231	0.908815	0.697462	1.08417	0.724442	0.578244	0.213915	0.638068	0.0914599	0.650403	0.369007	0.48518	0.438686	0.806207	0.802076	0.58172	0.728534	-1.00509	0.292374
22495	MRPS27	H200012396	1.52012	-0.0501771	-0.215798	2.78431	2.302	1.38768	0.360362	0.936963	0.133495	-0.541008	-1.3852	-1.47547	-0.352294	-0.0744086	-0.258047	-0.46371	-0.447982	0.122393	-0.567489	-1.03863	-0.594068	-0.540599	-0.234585	-0.441736	-0.378206	-0.0654059	-0.422491
4918	opHsV0400008556	opHsV0400008556	0.420438	-0.680515	1.06239	0.195698	1.28918	1.00482	-0.056447	0.200007	-0.0262229	-1.9081	-1.86821	-1.4648	-1.90253	-1.60363	-0.803743	0.0639059	0.141634	0.272762	1.47523	0.114168	0.74998	0.875171	0.651195	1.00767	0.01347	0.444683	0.331773
35530	ZNF593	H200011173	-0.74975	0.697065	-2.33087	-1.24098	-0.781755	-2.14841	-0.562585	-0.532593	-0.165968	0.825598	1.93091	1.77826	1.00831	1.61094	0.468417	0.135373	0.305169	-0.0083602	0.63659	-0.0463619	-0.207186	-0.27078	-0.263498	-0.102283	0.0623238	-0.0456679	-0.00191226
14628	CRELD2	opHsV0400001581	-0.474091	0.716195	-1.24902	-1.18339	-1.37989	-1.13573	-0.412535	-0.721251	-0.561905	1.15855	1.94846	1.8755	0.422859	1.4363	0.618578	0.345815	0.45642	0.619604	1.41148	0.536877	-0.533892	0.0352842	-1.17196	-0.293882	-0.857862	-0.970985	-0.635521
29680	RNF13	H200001327	0.195115	0.597114	1.95658	1.42278	1.13295	0.935958	0.119282	-0.0796072	0.314015	-1.35508	-1.45114	-1.55452	-0.193474	-1.51606	-0.597145	-0.604112	-0.636209	-0.904344	-0.327808	2.30124	-0.548005	-0.144488	-0.00457865	0.124062	0.0385607	1.01831	-0.239388
24957	OGG1	H300010946	-0.640973	0.424387	-0.728246	-2.63628	-2.58093	-2.0921	-0.104217	-0.819596	0.0234491	0.676958	0.392665	0.441953	0.805337	0.465435	0.685662	0.451656	-0.0533447	0.293263	1.00867	0.641279	0.378465	0.622038	-0.0910316	0.827961	0.493434	0.200139	0.913974
11250	BCCIP	H300016843	0.282381	0.283505	1.12414	1.46619	1.43776	1.72064	0.310965	1.07329	0.877169	-0.858826	-1.60448	-0.921697	-0.102136	0.0414794	-0.0937138	-1.34049	-1.18669	-1.02629	-1.76899	-1.60156	0.0785721	0.881179	0.297259	0.368701	0.287683	0.265752	-0.291796
3253	opHsV0400005153	opHsV0400005153	-0.392386	-0.992188	-0.527317	-2.10986	-2.08764	-2.11133	-0.455013	-0.478243	-0.0135802	1.79319	0.735703	0.503537	-0.414958	-0.282287	0.846398	0.0531979	0.141121	1.14576	0.640236	-0.203847	0.023092	0.400949	-0.107404	0.776792	0.973853	1.28949	0.852731
8624	opHsV0400012887	opHsV0400012887	-0.762312	-0.0929006	0.608945	-0.647697	0.136639	0.800871	-0.0166772	0.947008	-0.852497	2.24953	1.65432	1.39062	0.63682	1.01378	1.56933	-0.00430279	-0.205294	-0.426592	-1.51128	-0.549683	-0.802048	-1.23078	-1.33864	-1.03739	-0.741695	-0.470731	-0.317333
12024	C18orf55	H200001528	-0.530368	0.859193	1.32343	-0.951704	-0.627429	-1.01354	-0.0557395	-0.109234	0.666728	-0.698496	-1.89447	-1.40832	0.512168	-0.29198	0.178375	-1.28692	-1.11154	-1.71069	1.19929	0.71539	0.781645	1.09572	1.11467	1.38327	0.754892	0.760536	0.345134
16162	EIF4G2	H200014211	0.581403	0.109568	0.621978	2.13173	2.0758	2.18872	0.283263	0.576749	0.419237	-1.39686	-1.08339	-1.96991	-0.155616	-0.385321	-0.200288	-0.315111	-0.138152	-0.420878	0.0984366	1.01299	-0.498296	-0.522308	-0.370797	-0.431675	-0.679247	-0.790963	-0.74105
14238	CLTB	H300021431	0.739728	0.911745	-0.386672	-1.02794	-0.809265	-0.64227	0.0644968	0.151359	0.0871633	-0.686559	-1.24552	-0.970188	-3.13737	-0.65367	-0.672323	0.0323037	0.256379	-0.369619	1.02198	1.2533	1.41228	0.550102	0.648528	1.05989	0.939879	0.729323	0.742923
33853	TXNDC4	H300019683	0.912383	0.495835	0.441619	2.43356	2.1665	1.80892	0.208288	0.396429	0.303376	-0.774258	-0.819472	-1.34557	-0.0624112	-0.840591	-0.466022	-0.263808	-0.0784361	-0.158142	-0.664631	-0.333389	-1.50279	-0.629898	-0.913662	-0.606589	-0.559426	-0.395235	1.24742
3044	opHsV0400004584	opHsV0400004584	1.09965	0.209221	1.19257	0.185102	-0.269866	0.327287	0.895621	-0.171749	-0.675224	-1.49523	-0.986348	-1.16525	-1.93538	-1.9897	-1.62497	-0.578937	0.674195	0.140293	1.34681	0.0924097	1.37565	1.0926	0.211651	0.710984	0.272356	0.516583	0.549665
22842	MZF1	H300004613	-0.816091	-1.09437	-0.798401	-0.7359	-1.69681	-0.829083	-0.902445	-1.1595	-1.11385	-0.239404	0.779163	1.1159	0.780272	0.521748	2.15602	-0.354785	0.0385719	0.359164	0.192603	1.05207	1.72897	0.00161247	1.42658	0.899205	0.123161	-1.08793	-0.346472
15617	DNAJB12	H300013593	-0.675388	0.924894	0.376582	-0.487473	-0.778881	0.0940755	-0.562884	1.18957	-1.02884	-0.434305	-1.21433	-0.300586	-1.15537	-1.17092	-1.69396	-0.41882	-0.210106	-0.827391	2.3896	1.71863	0.696935	0.695231	0.684856	0.980942	1.04545	-0.418514	0.580999
32863	TMC8	H300021151	-1.18768	0.318566	-0.0773753	-0.376433	-2.4124	-1.90741	-1.80839	-1.21129	-0.428127	0.428102	0.535199	1.43682	0.679073	1.20622	0.506734	0.41643	0.039418	0.350414	-1.2071	0.651242	0.845272	-0.154205	0.570995	0.695111	0.495476	0.726778	0.868554
29341	RBMX2	opHsV0400000247	0.120401	-0.292953	1.58464	-0.0300987	-0.510606	-0.628374	0.437486	0.0185847	0.779528	-1.4401	-1.40801	-1.21665	-0.759835	-1.19929	-0.700842	-0.545842	-0.577926	-0.729751	-1.44226	0.927254	1.65934	0.0725356	0.901263	1.19804	1.32041	1.20178	1.26129
16382	ERBB2IP	H200001598	1.82735	0.928857	-0.68217	1.94805	1.48226	1.44528	0.469875	0.560654	0.590604	-1.23589	-0.994481	-1.87582	0.0983044	-0.284043	0.0385355	-0.941064	-0.842556	-1.07758	0.0340998	1.18445	-0.311612	-0.83118	-0.791854	-0.788839	0.0485894	0.142566	-0.14239
24186	NP_689587.1	H300000552	-0.287176	0.545557	0.0574638	1.83732	1.93152	1.01792	0.330438	0.247715	0.372494	-0.28565	-1.26808	-1.04655	-0.332243	0.210686	-0.764684	-1.91881	-1.86217	-1.72721	0.477737	0.755567	0.281078	0.58443	1.32277	0.329496	-0.264475	-0.597376	0.0522334
2550	opHsV0400002754	opHsV0400002754	-1.5045	0.902399	-0.21246	-0.856437	-2.21441	-2.52522	-0.196057	-1.25239	-0.569703	0.789474	1.14192	1.18617	0.880786	0.760033	-0.12068	0.771038	1.2547	0.684072	-0.167808	0.311066	0.236905	0.760057	0.684025	0.147135	-0.475695	-0.080141	-0.334287
30591	SFRS14	H300021217	0.540371	0.211255	-0.467826	-2.36135	-1.61425	-2.34364	-0.0337844	-0.679221	0.21171	0.499973	1.66422	0.595688	0.653107	0.936083	1.08229	0.927411	1.2801	1.20205	0.0242256	-0.618238	-0.183142	0.150213	-0.647063	-0.385715	-0.198514	0.180293	-0.626249
22950	NCAPG	H200014576	0.508341	0.584309	0.285609	0.0894472	0.159102	-0.520102	0.978226	1.17253	0.856509	0.115682	0.47227	0.409592	-0.348988	-0.203348	-0.452774	1.55689	1.87743	1.61657	-0.577154	-2.14313	-1.04417	-0.27874	-0.415491	-0.395783	-1.54504	-1.34767	-1.4101
16381	ERBB2	H300020181	-0.27962	1.18093	-0.244209	-0.840158	-1.69684	-0.804318	-2.60524	-0.519676	-0.448861	1.35359	1.92744	1.57562	0.771613	1.06625	1.03052	0.431069	0.472936	0.308524	-0.757457	-0.857069	-0.225465	0.1392	-0.275112	-0.0554535	-0.288359	-0.0336707	-0.326189
22267	MMP12	H200000442	-0.212781	-1.13585	0.804342	1.04426	1.01615	1.00624	0.18696	-0.132482	-0.0563309	0.823449	0.870708	0.679229	0.42731	0.218505	0.283211	1.10776	0.964405	1.00407	-2.52728	1.02115	-1.19522	-1.19089	-1.25634	-1.1593	-0.766506	-0.939386	-0.885384
12034	C19orf2	H300020184	0.842998	0.39747	-0.545783	2.51565	2.33237	2.45677	0.337424	0.534315	0.25169	-0.736697	-0.812676	-0.902601	-0.149316	-0.485484	-0.422831	-0.213062	-0.202454	0.199483	-0.374172	-0.876579	-0.481539	-1.14864	-0.778609	-0.739128	-0.218899	-0.285518	-0.494174
6558	opHsV0400010597	opHsV0400010597	-1.21168	-2.03663	-1.2386	-1.06489	-1.12172	-0.37431	-0.819692	-0.458513	-0.808182	-0.462453	1.32265	0.601225	0.414759	1.94345	1.92648	-0.786722	-0.0443512	0.391873	0.317946	-0.238822	0.36908	1.19299	1.42123	0.437309	0.293963	0.0759571	-0.0423398
31241	SLC7A10	H200005343	-0.529785	0.143177	1.83247	0.116294	0.56925	0.0583623	0.773772	0.759758	1.21696	-1.59405	-1.58716	-1.41662	-2.29673	-1.60838	-1.257	0.556598	0.163794	-0.125463	0.332708	0.422509	0.912574	0.710778	0.0854047	0.582466	0.236429	0.405583	0.536296
8168	opHsV0400012376	opHsV0400012376	1.38358	-0.588775	1.81861	0.427269	0.399377	-0.638629	0.110188	-0.66695	1.0234	-1.2255	-1.35051	-1.05629	-1.01747	-1.61459	-0.323427	-0.848201	-0.641172	-0.981028	-1.11826	0.420382	1.01649	0.518181	0.762345	0.931351	1.37526	0.780971	1.10339
33266	TNS4	H200009623	-0.428266	0.208649	-0.0315815	-2.64086	-2.45929	-2.38697	-0.429395	-0.899611	-0.0771304	0.111859	0.755273	0.927705	0.719528	1.01647	0.551896	0.447208	0.255367	0.42943	0.463426	0.162666	0.0539166	0.208123	0.381668	0.430045	0.673981	0.880807	0.675075
15962	EBPL	H300019048	0.858112	-0.216272	-2.09047	-1.36877	-0.852563	-0.100757	-0.97143	-0.64642	-0.218589	0.531411	1.35818	0.98276	0.455638	1.07124	-0.0428236	1.66299	1.52893	1.54426	-2.0419	-0.443765	-0.00396211	0.1053	-0.483464	0.0662834	0.0520183	-0.377845	-0.358083
2916	opHsV0400004095	opHsV0400004095	-0.543311	0.52186	1.04456	-0.59657	-0.398532	-0.209673	-0.212739	0.418572	0.603502	0.482682	0.439795	0.731152	1.02853	-0.415587	0.841251	1.5541	1.59562	1.35584	-0.476208	0.600124	-2.44921	-1.3123	-1.42025	-1.48869	-0.547074	-0.590658	-0.556805
1186	H300007632	H300007632	0.0911325	0.119839	0.311118	2.5993	2.485	2.61399	0.191419	0.38527	0.30332	-0.222311	-0.569652	-0.315806	-0.603728	-0.203662	-0.168954	-0.794413	-0.305832	-0.353995	-0.582458	-0.765948	-0.813105	-0.661603	-0.797647	-0.585703	-0.239066	-0.113093	-1.00341
21984	MDFI	H300001204	-0.509917	0.229962	0.116207	-2.16914	-2.33166	-2.38534	-0.405254	-0.556994	-0.142472	0.935119	1.27385	1.59327	0.73442	1.09052	0.95468	0.446331	0.284197	0.406804	0.782213	0.225776	-0.266981	-0.042025	-0.0507479	-0.433279	0.0720315	0.450787	-0.302351
23167	NFKBIA	H200006833	0.323816	0.288097	1.85377	1.40363	1.38239	1.51505	0.151463	0.0819121	0.5434	-1.83579	-1.28744	-1.94041	-0.124627	-1.09273	-0.56159	-0.655691	-0.354674	-0.443516	0.4161	1.3744	0.364034	-0.938633	-1.07812	-0.418251	0.367898	0.463638	0.20187
34909	ZC3H8	H200005663	-0.658111	0.449242	1.06002	1.8659	1.20536	1.74208	0.355167	0.92438	0.523989	-1.37667	-1.44353	-1.42978	-1.26854	-0.917176	-2.29349	0.238528	0.0613028	0.0776555	-0.671497	-0.366394	0.174617	0.355342	0.0995825	0.204149	0.495065	0.329345	0.26347
23475	NP_001005354.1	H300000281	1.69372	0.725294	1.2359	2.12975	1.63384	1.0067	0.432172	-0.585681	0.447035	-1.22364	-0.484447	-0.459776	0.260298	-0.620389	-0.243557	0.411051	0.166152	0.312957	-0.0684999	0.626981	-1.02064	-1.22098	-1.31995	-1.65325	-0.276596	-1.15695	-0.7475
32874	TMCO4	H300006113	-0.486871	-1.10636	0.763903	-1.5973	-0.363361	-1.48523	0.62035	0.532167	0.142671	-0.000511212	0.0794615	-0.182516	-0.981563	-1.19339	-1.31218	-0.442428	-0.720959	-1.27207	1.0385	1.16277	2.34196	0.324068	0.817399	0.328875	1.25207	0.781087	0.959438
35545	ZNF607	H200019554	0.130149	-0.5296	-1.21211	-0.158611	-0.281728	-0.194189	-1.90017	-2.38397	-1.69109	0.714913	1.71678	0.924551	0.817388	-0.0788009	-0.152419	1.16319	1.2328	1.30324	0.0961122	-0.547616	0.768656	0.416693	0.440232	0.192877	0.210088	-1.00329	0.00594674
16215	ELOF1	H200019176	0.276804	-0.327025	-0.492926	-2.08614	-3.15487	-1.20403	-0.538219	-1.3663	-0.220549	0.30661	-0.338371	1.14467	0.155917	-0.0447442	0.0250297	0.685679	0.485994	1.20084	0.894865	0.938284	0.612767	0.366556	0.483403	0.303209	0.691701	0.281541	0.919289
20574	KNTC2	H200005304	1.97569	0.195127	0.0165047	0.641833	-0.287849	-1.09101	0.365967	0.911908	0.884425	0.425255	0.850634	0.381376	-0.215074	0.0215065	-0.38234	1.29466	1.1181	2.00564	-0.740821	-1.91394	-1.03787	-0.713988	-0.991178	-0.569096	-1.14637	-1.08968	-0.909413
24411	NP_955377.2	opHsV0400005695	0.239984	-0.155554	1.01933	-1.47161	-1.09192	-1.33421	-0.384653	-1.05028	-1.79192	1.8527	0.582713	0.963019	1.99745	1.38486	1.21103	0.426949	0.147661	0.442305	0.105109	0.261112	-0.205747	-0.762795	-1.14017	-0.853064	-0.0207193	-0.236333	-0.135244
23261	NLGN3	opHsV0400005082	-0.339605	-1.7467	0.394538	-0.341638	-1.03666	-1.32498	-0.599997	-0.622314	-1.18333	-0.85498	-0.506567	-0.628376	0.0756158	0.475693	0.508419	-0.493219	-0.682376	0.168283	-1.06119	0.239819	1.64673	1.80149	0.853899	1.63446	1.01443	1.3231	1.28545
35785	ZYG11B	H200014218	0.739907	1.30759	0.750083	1.07869	2.00458	1.57838	0.133676	0.464853	0.130527	-0.632201	0.104751	-0.974889	-0.836953	-0.335507	-0.48362	-1.55968	-1.41168	-1.55567	1.32436	0.570408	0.029066	-1.14674	0.806531	-1.32785	-0.22864	-0.244941	-0.28503
25635	PARP4	H200006367	-0.557277	0.0164299	1.22851	2.22636	2.31581	1.96187	0.142643	0.331717	0.437868	-1.19761	-0.62612	-1.41216	-0.284892	-1.33462	-0.462568	-0.809047	-0.620073	-1.03701	-0.344055	0.808302	-0.839718	-0.305191	0.150238	0.179139	0.0282555	0.163587	-0.16039
22528	MSC	H300021620	1.4667	-0.0762582	-0.728402	1.02404	-0.363459	-0.202787	-0.189824	-1.20181	0.483138	-0.568252	-0.528125	0.163311	-0.469927	-0.648612	-1.15851	-1.38517	-2.03942	-1.4182	1.11604	1.10708	0.841728	0.132376	0.384909	0.621591	0.410838	2.14644	1.08057
34214	USP20	H300019467	-0.414652	-0.186946	-0.793584	-2.17658	-0.717519	-0.180986	-0.618601	-1.25724	-1.01789	1.19468	1.25286	2.44804	0.469008	0.144226	-0.638558	1.10921	0.618258	1.82987	-0.258812	-0.0720309	-1.19051	0.0817317	0.359501	0.668829	-0.311331	-0.331234	-0.00975049
30666	SH3BGRL	opHsV0400000212	0.271888	0.387709	1.65394	2.10125	2.18576	1.78207	0.0273802	-0.0383788	0.665344	-1.15262	-1.54268	-1.31783	-0.692959	-0.916727	-0.164561	-0.0948119	-0.0284158	-0.00173004	-0.360829	0.617237	-0.877884	-0.832786	-0.846642	-0.816417	0.165676	-0.193937	0.0209387
24169	NP_659495.1	H300007400	0.457112	0.40151	0.927199	1.91726	1.068	1.41896	0.422241	0.169631	0.568852	-1.10993	-1.34264	-1.18869	-1.14915	-1.91953	-0.754121	-0.286621	-0.241567	-0.444247	-0.182337	0.425886	0.389188	-0.193377	0.333855	-2.12923	0.873874	0.850579	0.717308
25786	PCOLCE	H200014927	-0.552381	0.932855	-2.35041	-0.148119	-0.667924	-0.74213	-0.852367	-0.468123	-0.565507	1.12439	1.72778	1.5353	1.54098	2.0417	1.07491	0.134347	-0.315891	0.263212	-0.50988	0.48465	-0.53464	-0.779034	-0.54706	-0.440786	-0.427696	-0.463147	-0.495017
32956	TMEM153	H200013708	0.338692	-0.407079	0.488238	-1.75166	-0.667559	-0.205798	0.338377	0.662708	0.597321	-1.603	-1.0575	-0.197996	-0.518688	-1.60032	-1.42155	-0.157826	-0.0112807	-1.06081	0.677061	0.416565	1.71527	1.36511	1.61496	1.1554	0.86721	0.941275	-0.517123
31223	SLC6A18	H300013321	-1.56799	-0.953081	-0.268128	-2.07275	-2.19879	-0.550613	-0.127533	-0.872039	-0.481726	1.70089	1.61968	1.58205	1.07786	0.00608443	0.689328	0.0532681	-0.383948	-0.703918	0.389704	0.902598	0.268482	0.216449	0.238001	0.659709	0.129327	0.243523	0.403563
18313	GSTP1	H200015364	-0.262451	0.223681	-1.58923	-0.243214	-0.268606	-0.338666	-1.77708	-2.58534	-1.36274	0.509014	1.26167	1.90225	1.01949	0.64421	0.0921185	0.696755	0.859759	0.685651	0.57129	1.14903	0.490319	-0.266021	0.0813793	-0.169833	-0.0813756	-0.54357	-0.698487
22468	MRPL51	H200005187	-0.0923682	-0.00835305	0.112274	2.98491	1.86249	1.73353	0.663666	0.849887	0.519923	-0.508808	-0.963092	-0.400614	-0.378397	-0.938801	-1.00032	-1.01162	-1.17533	-0.659348	-0.39654	0.540888	-1.11174	-0.576471	-0.508267	-0.541647	0.236572	0.50649	0.261095
1278	H300008838	H300008838	1.01454	0.470169	1.57219	1.16253	1.38235	0.995786	2.17054	0.155302	-0.504688	-1.07806	-1.03463	-1.05133	-0.284429	-0.23579	-0.460239	-1.15556	-0.858768	-1.22424	0.85348	1.36717	0.510595	-0.314431	-0.284402	-0.436009	-0.878478	-0.75622	-1.09738
3069	opHsV0400004660	opHsV0400004660	0.46155	-0.312939	0.826645	2.61761	1.99108	2.35475	0.106792	0.568086	-0.266548	-1.01745	-1.12014	-1.19781	-1.00235	-1.21534	-0.861448	-0.547584	-0.155551	-0.369273	-0.213011	-0.649176	0.413709	-0.0303767	-0.0126988	0.0494912	-0.425372	0.0667754	-0.0594346
18092	GPR160	H200010772	1.78952	0.0199193	1.57206	1.29746	1.14221	1.37879	0.66985	0.30587	0.532806	-0.613405	-0.363475	-0.824925	-0.3891	-0.914313	-0.860392	0.823787	0.773427	0.53833	-0.960428	-2.54111	-0.152838	0.121272	-0.643014	-0.365344	-1.14616	-0.33067	-0.860119
15257	DDX11	H300017951	-0.159124	0.520598	-0.644551	-0.819319	-0.907745	-2.53624	-0.594379	-0.843871	-0.677952	0.283483	1.12911	0.776792	0.86092	0.524476	0.572474	1.41986	1.41974	1.81819	0.278011	-0.913104	-0.171096	0.67603	0.377365	-0.125109	-0.266842	-1.88577	-0.111943
8982	opHsV0400013267	opHsV0400013267	-1.44929	1.16821	-0.176633	-1.27693	-0.898463	-0.692511	-0.719394	-0.811485	-1.05427	2.13217	1.41772	1.40107	1.17208	1.84356	0.726114	0.21227	0.083512	0.0540715	-1.15159	0.0226387	-1.01449	-0.150619	-0.613016	-0.755894	0.20234	0.210702	0.118127
4445	opHsV0400007983	opHsV0400007983	-0.559136	-0.435804	-2.00941	0.809103	-1.01685	-1.76624	-1.18346	0.445034	-1.60065	1.67759	0.922837	0.837185	0.483034	-0.17277	0.655899	1.20643	1.09115	1.76402	0.0735305	-0.380677	-0.170863	-0.851936	-0.295675	0.0593451	0.72539	-0.380599	0.0735305
12372	C20orf24	H300016310	0.427933	0.452868	1.63596	0.275903	0.644943	0.24938	0.148218	0.306181	0.424268	-2.31001	-1.77135	-1.10659	-1.22331	-1.85387	-0.729272	-0.402272	0.163311	0.0491487	-0.781939	1.59323	1.3143	-0.252403	0.409013	0.547665	0.842151	0.185392	0.761139
5129	opHsV0400008846	opHsV0400008846	-0.346093	0.534406	-0.162593	0.906017	0.680589	0.626398	0.766215	0.802143	0.277041	1.41423	-0.356835	0.351069	0.581846	0.396252	0.181191	1.1471	0.364032	1.00315	-3.12343	-0.0463539	-1.07042	-1.18158	-1.61679	-1.48729	-0.383418	0.0212411	-0.278122
35447	ZNF518	H300021510	1.21852	-0.835558	0.926984	0.352227	0.444023	-0.188779	0.825995	-0.8157	-1.07337	-1.00964	-1.77945	-1.34699	-1.31998	-1.03853	-0.66955	-0.504618	0.131456	-0.809232	-0.723407	0.898182	1.49262	1.04887	0.972522	1.23893	0.772683	0.364961	1.42684
22853	NAALADL1	opHsV0400003384	0.12462	0.567407	0.913765	0.307787	-0.826538	-0.187637	0.639604	-0.401881	0.849778	-1.72206	-0.984052	-1.3564	-1.89151	-1.80755	-1.71101	-0.0428357	1.03831	-0.281986	0.505107	0.321395	0.897738	1.03552	0.996932	1.25977	0.348338	0.911921	0.495484
23595	NP_001013734.1	opHsV0400008933	-0.469254	0.025783	0.180323	-2.70272	-2.51504	-2.30641	-0.226738	-0.598743	-0.344791	0.205767	0.291627	0.40834	0.395792	0.395809	0.685596	0.179123	0.095829	0.0616005	0.140531	0.672649	0.375418	1.03276	0.824132	1.21228	0.587105	0.727121	0.666104
30707	SHANK2	opHsV0400008205	-0.523545	-0.0724922	-2.07021	-0.823503	-1.74838	-1.29728	-0.80836	-1.01811	-0.13369	0.767846	2.07283	0.860476	-0.189847	0.242427	1.61521	0.276768	0.773393	0.853154	1.41971	-0.0169188	0.857628	-0.790195	-0.788168	-0.298103	0.179336	-0.0166129	0.676639
7808	opHsV0400011991	opHsV0400011991	-0.793732	-1.07779	0.648629	-1.5479	-1.72098	-3.28914	-0.687455	0.0809544	-0.798205	0.201987	0.643121	0.265433	0.14869	0.210521	0.851298	0.959227	0.435099	0.91525	0.434799	0.33913	1.11046	0.131755	0.18905	0.217755	0.641719	0.934961	0.555357
17255	FNTA	H200020470	1.80778	0.857553	0.699924	1.24242	2.95135	-1.03921	0.919701	0.857919	0.726293	-1.21933	-0.717488	-1.23053	0.052098	-0.956182	-0.641361	-0.398624	-0.330995	-0.558929	0.239433	-0.468571	-0.828578	-0.579876	-0.76255	-0.820892	-0.124868	0.0742325	0.249285
27066	PRR6	H300005242	-2.48464	0.302317	-0.336171	-1.16109	-0.381346	0.95573	-0.550133	-0.0120224	-0.673563	0.592938	1.10833	0.634146	1.87933	1.2662	0.890453	0.629163	0.947034	1.23417	-0.251408	-1.83145	-0.510134	-0.528434	0.3439	-0.0259075	-0.754916	-0.277606	-1.00489
26488	PML	H200010368	0.189831	-0.499555	1.34922	1.78177	1.12925	2.46048	-0.357505	0.133068	-0.465154	-1.33601	-1.43271	-1.20754	-0.840507	-1.75639	-1.35201	-0.48721	-0.246212	-0.426646	0.244127	0.206811	0.589304	0.238039	0.468308	0.815842	0.145864	0.381916	0.273617
21273	LOC653264	opHsV0400000814	-1.40334	0.475936	-0.384796	0.075164	0.0133523	-0.513158	-0.187399	0.0198514	-0.282171	1.10061	2.3928	1.70565	1.64689	1.8205	0.788496	-0.0517684	-0.386979	-0.195216	0.144191	-0.134267	-1.14887	-0.954026	-1.18413	-1.05557	-0.620505	-0.799898	-0.881339
2247	opHsV0400001587	opHsV0400001587	1.47528	0.839646	1.04798	1.47013	1.06366	1.86448	0.358525	0.824344	0.189559	0.00289001	-0.445583	-1.63687	-0.161584	0.408968	-0.0643761	-1.40304	-0.906121	-1.22013	0.828937	-2.03925	-0.0708688	-0.0113053	-0.0543207	-0.300372	-0.799433	-0.0494985	-1.21165
1324	H300009362	H300009362	-1.2106	-0.0724936	-0.38183	-0.368751	-0.175629	-0.190453	-0.758154	-0.531938	-0.505918	1.14241	2.11758	2.25825	1.49646	2.28715	0.747872	-0.346221	-0.195508	-0.331746	-0.0320727	-0.81448	-1.18991	-0.175731	-0.926125	-0.274252	-0.560788	-0.419911	-0.587218
29605	RIN3	H200008400	2.716	-0.449223	1.10975	-0.474812	-0.49389	-0.00341242	0.202305	-0.298841	0.461287	-1.72848	-1.16624	-1.08889	-1.51288	-1.57999	-0.828062	-0.401977	-0.271038	-0.394275	0.265532	0.671056	0.32201	0.438594	0.703099	0.945276	1.0807	0.761167	1.01524
1653	H300014291	H300014291	0.0745982	-1.24789	0.47268	0.882097	0.981402	2.14526	0.480575	0.5723	0.0419489	-0.509558	-0.753454	-0.928654	-1.25758	-1.75827	-0.894782	-0.53538	-0.233899	-2.31408	-0.0526542	-0.371406	1.04358	0.872448	0.792785	0.845706	0.202906	0.835001	0.614324
35324	ZNF398	H300002183	1.6562	0.602743	1.29244	1.54599	0.840826	-0.3287	1.31391	0.673672	0.39472	-1.03878	-0.526751	-1.01096	-0.0343526	-1.14332	0.927806	-1.59922	-2.44063	-1.05679	0.417069	0.0920259	0.783376	-0.0825051	-0.698522	-0.444968	0.00986205	-0.117316	-0.02783
27762	Q6PK57_HUMAN	opHsV0400003091	-0.495597	0.800984	0.0803843	-0.83109	-2.57412	-1.92168	-0.291487	-0.207071	-0.594173	1.36595	0.848851	0.574087	1.03965	0.626215	0.306424	1.85748	1.21128	1.18869	0.157309	-0.922813	-1.18543	-0.476882	-0.32784	0.0179046	-0.40066	0.15855	-0.00491382
31661	SPATA20	H200011226	-0.455286	1.04399	0.0920013	-1.54471	-1.52438	-0.6811	-0.234408	-0.843854	0.0320545	-2.49713	-1.11031	0.121523	-0.728876	-0.369011	0.40539	-0.226834	-0.148502	-0.504093	1.78922	0.958641	0.823714	0.934808	0.909782	1.08249	1.05732	0.884726	0.732835
12975	CACNA1C	H300016764	-0.0936388	0.660287	-1.71227	-0.775947	-1.1912	-1.30805	-0.425293	-0.159994	-0.296085	1.30865	1.8575	1.19066	1.30183	1.53658	0.904923	0.506985	0.334952	0.210163	0.697337	0.941649	-0.793356	-0.61676	-1.17318	-1.29359	-0.25064	-1.07213	-0.289394
3287	opHsV0400005265	opHsV0400005265	-0.0754192	0.0274864	0.659233	2.38819	1.96316	1.8843	0.237567	0.00146305	0.0185804	-0.898803	-1.31812	-1.5397	-1.30291	-0.860413	-0.907621	-0.702391	-0.770001	-0.302087	0.660054	-0.908543	0.13945	0.759246	0.681567	0.760383	-0.300192	-0.0933072	-0.201177
26234	PIP5K2C	H200013452	0.0874051	0.000904407	1.07407	1.951	1.9693	1.47915	0.254481	0.960086	0.80455	-0.805274	-1.12044	-1.43205	-0.861308	-0.411178	-0.644149	-0.678234	-0.892876	-0.296715	-0.184936	2.09574	-0.535287	-0.659644	-1.01068	-0.290261	-0.115788	-0.658226	-0.0796377
27162	PSMA4	H200016300	0.466921	0.203639	0.271972	3.10616	1.81422	2.46692	0.258255	0.239672	0.362636	-0.746256	-0.481316	-0.390144	0.369971	-0.685874	-0.360827	-0.866676	-0.90587	-0.632425	-0.390453	-0.784371	-0.380643	-0.895167	-0.654933	-0.579026	-0.283794	-0.119112	-0.403477
11950	C17orf27	opHsV0400004149	-1.10207	-0.101488	-0.0595521	-1.53682	-1.45162	-2.09407	-0.543587	-0.215741	-0.579887	1.0808	1.67336	1.55141	1.43891	1.76186	1.2245	-0.147107	-0.297216	-0.0773713	0.900563	-0.143434	-0.30918	-0.847422	-0.398511	-0.357888	0.133756	0.249395	0.248418
10586	ARF1	H200005963	-0.342654	0.261264	-0.268495	-2.23998	-1.91055	-2.1975	-0.172807	-0.764179	0.303369	0.283291	0.252978	0.586417	0.961465	1.25589	0.597988	1.38576	1.52795	1.61508	0.0737647	-0.516691	-0.811263	-0.0698889	-0.40457	0.248231	0.314441	-0.170068	0.200764
35189	ZNF230	H300007867	-0.378739	-0.328519	0.644039	2.72246	1.55137	0.94627	0.679512	1.38954	0.199109	-0.923171	-1.1839	-1.71321	-0.961784	-0.0060701	-0.905438	-1.24081	-0.564927	-0.906016	1.23398	0.0204429	0.249858	-0.621645	-0.36971	-0.332267	0.402503	0.437608	-0.040487
13227	CCBL2	H300021960	0.858596	0.255602	0.693539	1.55098	1.37451	1.83387	0.869144	0.811834	0.794528	-0.64546	-0.720021	-0.348401	-0.27211	-0.557983	-0.205077	-1.07947	-0.957214	-1.17248	-0.442072	2.11863	-1.1367	-1.2163	-1.16092	-1.08685	-0.0214412	-0.267118	0.12838
33233	TNNI2	H200007059	0.268339	-0.0509977	0.102924	-2.86447	-1.87173	-1.72349	-0.687966	-1.81919	-0.540631	-0.276514	0.95704	1.00639	0.255933	0.504984	-0.137238	0.995868	1.13897	0.445865	0.229125	0.306091	0.820194	0.628117	0.413178	0.606788	0.384321	0.36448	0.543633
22973	NCOA4	H300016335	-1.38606	-0.50801	0.203826	1.18111	1.29789	1.07167	1.39791	1.11925	0.647606	0.436292	-0.996741	-0.855389	-1.36614	-1.21724	-1.09629	-1.09779	-1.15078	-1.83632	-0.0327908	-0.471355	0.785108	0.570078	0.642614	0.329452	0.942339	0.599392	0.790347
10863	ASTE1	H200017424	-0.956505	0.215541	1.17321	0.23295	0.208688	0.212021	0.00282465	0.1915	-0.179778	-1.30387	-1.38212	-1.72467	-1.63754	-1.21999	-0.923993	-0.318128	-0.162968	0.217797	2.36854	-0.935949	1.16793	0.867965	0.890813	0.837331	0.725387	0.805169	0.627836
20349	KIAA1875	H200010911	0.750606	-0.0470411	2.28361	-0.192146	-1.17237	-1.0851	0.394902	0.364219	0.429143	-1.30927	-0.72448	-1.24702	-1.11148	-1.29483	-0.565516	-0.173947	-0.25707	-2.00058	0.944402	0.632312	1.22713	1.03649	0.801432	0.537681	0.303064	0.894743	0.581123
10517	APOB	H300011103	0.348662	0.281472	-1.01615	0.268456	-0.637515	-0.209892	-0.900612	-0.196287	-0.599749	1.15328	1.60183	1.30607	1.44685	1.79757	0.944374	0.400964	-0.15778	0.460287	1.28829	-0.273329	-1.45115	-0.23677	-0.826572	-0.846742	-1.39318	-0.873534	-1.67884
17123	FGFR1OP2	H300010715	1.15304	0.106852	0.542761	1.91229	0.545811	1.25906	0.396667	0.22556	-0.629929	-0.722241	-0.526209	-1.37156	-0.662703	-1.2675	-0.465699	-1.3798	-1.08607	-1.64854	2.27212	-0.104824	1.03626	0.7351	0.480176	0.0937619	-0.611438	-0.00898788	-0.273952
21937	MCCC2	H200007735	0.539001	-0.213228	1.74152	1.26856	2.17208	0.600594	0.96627	1.3681	0.679759	-0.339569	0.519333	-1.59941	-0.706232	0.294032	-0.411528	-0.420541	-0.344233	-0.552092	-0.403386	-2.65803	-0.3898	-0.14154	-0.398365	-0.163556	-0.201339	-0.492745	-0.713663
20298	KIAA1539	H300019787	-0.295499	-1.4658	1.61227	0.842215	-0.486429	0.579154	0.427592	0.883836	0.439472	-1.46571	-1.60763	-0.532943	-1.53277	-2.19945	-0.905483	0.0302199	-0.472739	-0.236646	0.259259	0.197872	0.952008	0.386826	0.916473	1.07678	0.917588	0.776066	0.903459
17130	FGFR4	H300011796	-1.21385	0.464116	-2.32009	0.766537	0.268982	-0.0864551	-0.338415	-0.497278	-0.293295	1.3359	1.43435	1.38801	0.777028	0.767211	0.546591	0.942425	0.242504	1.64089	0.412373	0.0858194	-1.02483	-0.749041	-1.16001	-1.59461	-0.323405	-0.578362	-0.89311
34201	USP14	H200006242	1.53443	0.199895	0.661777	2.198	1.77801	2.44838	-0.116371	0.23491	0.0717882	-0.818216	-0.758439	-1.58132	0.278963	-0.737869	-0.396959	-0.582562	-0.507067	-0.991835	-0.285318	0.409349	0.151851	-0.427972	-0.0872186	-0.179991	-0.784724	-0.394383	-1.3171
11182	BAK1	opHsV0400005670	-1.16886	0.000167866	-0.232496	1.23768	0.654693	0.679039	-0.658491	0.350414	-0.824295	0.881447	1.15607	2.50123	0.669489	0.882925	0.228213	0.552375	0.458188	0.615119	-0.234842	-0.392878	-2.02481	-0.246995	-1.5911	-0.560804	-1.21965	-1.18012	-0.531704
32499	TCF7L2	H300020410	0.325098	-0.845007	-1.19201	1.63776	1.66536	0.904728	-0.291465	0.136749	-0.293612	-0.528471	-1.63006	-1.04939	-1.12706	-0.161145	-0.77976	-1.1803	-1.25731	-1.07462	0.904571	0.833828	0.970543	0.930928	1.28314	1.46191	0.342026	0.0379971	-0.0244447
11653	C10orf85	H300009239	0.257296	-0.534346	-0.980042	-2.13961	-1.39022	-1.17976	-0.534511	-1.02885	-0.816585	1.26898	0.122315	0.170446	-0.618894	1.70674	0.492574	-0.367799	-0.596178	-1.3503	0.219941	1.1149	0.893382	0.921352	1.25218	1.15813	0.915441	0.385166	0.658235
34779	YG02_HUMAN	H300005607	-0.319342	0.689201	0.110068	-1.92839	-2.18242	-1.01544	-0.922996	-1.49815	-1.17827	0.132215	0.737508	0.682166	0.728029	0.476383	0.531025	1.64335	1.08388	1.63652	0.916107	0.590612	-0.199972	0.178616	-0.477261	-0.286081	0.321607	-0.938743	0.489784
11145	B4GALT5	H200011525	1.06705	1.24896	2.57882	2.01573	1.61069	0.633716	-0.0941795	-0.512419	0.272982	-0.954863	-0.230899	-1.22366	-0.275374	-1.85034	-0.652926	-0.478407	-0.21144	-0.788194	0.0961274	0.536921	-0.683384	-0.482252	-0.445685	-0.852491	-0.0531434	-0.114422	-0.156909
3505	opHsV0400006036	opHsV0400006036	0.501555	0.586299	0.638548	0.477862	-0.0203327	0.237954	0.466676	0.855865	0.552948	-1.33758	-2.08843	-2.30526	-0.0518192	-2.86001	-0.295487	0.255159	-0.772103	0.263933	0.917426	0.664964	0.313447	0.418783	0.393255	0.328022	0.668481	0.683388	0.506449
31382	SMG5	H200000965	0.0501409	-0.0213051	0.0412818	-2.4188	-1.98812	-0.836842	-0.995706	-1.44657	-0.996108	-0.863635	0.358398	0.600359	-0.175999	-0.771982	-0.366672	0.596746	1.23254	0.898392	0.941102	0.0873136	1.40432	1.02346	0.760497	1.02654	0.659728	0.466801	0.734121
13210	CBX3	H200017304	2.47208	-0.112971	0.299769	2.63395	0.865795	1.96477	0.496397	0.405871	0.0918767	-0.488217	-0.440308	-1.10384	0.165824	-0.00141254	0.27357	-0.584113	-0.752559	-0.574815	-0.82958	-1.32414	-0.0767674	-0.626124	-0.0484031	-0.483497	-0.808693	-0.485671	-0.928782
608	H300000449	H300000449	-0.414974	-0.0463092	-0.0790234	-2.12215	-2.42959	-2.549	-0.850638	-0.588399	0.19015	0.844292	0.997343	1.23475	0.637894	0.765791	0.886728	0.3815	0.194738	0.548328	1.00676	-0.281245	-0.305774	0.411142	0.0557691	-0.0871424	0.437015	0.783078	0.378978
18916	HORMAD1	H300022836	0.0213163	-0.428304	0.129194	-1.81626	-2.28425	-2.57318	-1.01401	-0.645924	-0.254698	-0.284802	0.375311	0.122161	0.712451	0.218183	1.08422	0.393175	-0.206203	-0.10523	1.45316	-0.495118	0.880829	0.92821	0.579156	0.907598	0.702534	0.645788	0.954697
25411	OSBPL6	H300010693	-0.638583	0.624006	-0.577125	-2.10047	-1.94071	-2.72943	-0.33461	-0.531971	-0.62583	1.08433	1.05832	0.555508	1.02062	1.27903	0.471403	0.424334	0.227115	0.466005	-0.913511	0.451629	0.0984684	0.76576	0.374334	0.464775	0.364239	0.0489749	0.613378
13495	CD163L1	H300002344	1.079	0.438426	1.14538	1.19423	0.437381	0.491367	0.111475	0.574265	0.990761	0.500835	0.993387	0.1847	0.628796	0.230948	0.112873	-0.0864537	-0.150238	0.0238632	0.454756	1.22673	-1.06157	-1.55453	-2.14354	-1.6456	-1.41502	-1.45152	-1.31069
5856	opHsV0400009771	opHsV0400009771	-1.05523	-0.0939027	0.252911	1.12492	1.14869	1.55015	-0.0415844	0.182662	-0.121248	-0.0317251	-1.08782	-1.35214	-2.18907	-1.02771	-0.440933	-0.998897	-0.955239	-0.936866	1.95844	-0.451936	0.414549	-0.102325	0.783912	1.06137	0.657377	0.917126	0.834507
14567	CPOX	H300009203	0.137449	-0.089213	0.548043	2.62451	2.81599	1.9242	0.381951	0.82073	0.0300822	-0.266623	-0.620627	-0.571584	-0.318388	-0.152897	-0.736366	-0.813787	-0.534634	-0.297336	-1.13517	-0.354898	-0.600801	0.273806	-0.40977	-0.699438	-0.686167	-0.458657	-0.810411
5952	opHsV0400009874	opHsV0400009874	-1.89604	1.2171	-0.473301	-1.36842	-1.53687	-1.97157	-0.768588	-0.503311	-1.75199	0.75045	1.37506	0.759328	1.4325	0.421309	0.932345	0.084873	-0.250225	0.437731	0.535286	0.19408	1.06959	0.0595305	0.271073	0.608992	0.172029	-0.293053	0.492091
27692	Q68DK7_HUMAN	opHsV0400011330	2.44611	0.0360282	0.424256	1.9748	1.09311	1.95905	0.524688	0.392353	0.0728642	-0.381992	-0.771696	-0.83355	0.293455	0.0352716	0.322221	-0.707045	-0.277735	-0.202099	-0.619433	-0.174784	-0.923958	-1.63428	-1.25307	-1.63365	-0.129597	-0.133246	0.101919
21010	LIME1	H300008638	-1.23145	0.777763	-1.40864	-1.09698	-1.09881	-1.51311	0.158024	-0.654982	0.00111279	0.903966	1.77421	1.10265	0.71721	0.216865	0.4907	1.77527	0.108646	1.93347	0.333285	-0.839162	-0.49703	0.747689	-0.0475137	-0.108067	-0.799373	-0.703582	-1.04217
29675	RNF123	H200002530	-0.491279	-0.349259	-0.26584	-2.42184	-0.547946	-0.265875	-0.814029	-1.40429	-0.42821	-0.705722	0.117773	0.162033	-1.3756	-0.375648	-1.12332	0.0354645	0.535129	1.04234	1.80283	0.231209	1.59744	0.908875	0.828974	1.62926	0.683351	0.0971658	0.897005
14077	CITED1	H200004484	0.322432	0.661546	0.30487	0.50336	0.286753	0.462345	0.492195	0.309986	0.914139	-1.44627	-1.77629	-0.952638	-2.28157	-2.1524	-1.96037	0.652192	0.392955	0.332502	1.07711	0.679295	0.524145	0.547908	0.47705	0.520272	0.340016	0.455568	0.312908
6917	opHsV0400011001	opHsV0400011001	0.718649	0.211299	0.804728	0.693714	0.0418756	0.422986	0.346557	1.34702	0.278031	-2.14109	-1.28844	-1.92936	-0.0281035	-2.28483	-2.12267	0.0338844	0.275717	0.289424	0.516998	0.752608	0.429746	0.609211	0.581771	0.364194	0.376294	0.26094	0.438842
15020	CYB5D1	H300003176	-1.08884	-0.362406	-0.455811	-1.64344	-0.520324	-0.819981	-0.262104	-0.572036	-3.207	1.54079	1.47502	1.38988	-0.12198	0.65072	0.676016	0.353478	-0.064732	0.47906	1.31133	0.614257	-0.152868	-0.0921124	-0.0263565	0.0723803	0.450828	0.131499	0.244731
35756	ZRANB2	H200014668	1.80899	1.84069	0.586189	1.88774	0.340288	-0.0109217	0.798626	0.590006	0.700563	-1.59682	-0.76536	-1.65263	0.586243	-0.236059	-0.21122	-1.33684	-1.02309	-0.997149	0.288446	-1.82301	0.157979	-0.00398166	0.316082	-0.0730654	-0.123056	0.247251	-0.295901
20752	LAGE3	H300001600	-0.498942	0.50958	-0.948364	-1.01291	-1.71097	-2.1279	0.13017	-0.881071	-0.643449	0.77467	1.26897	1.53697	0.322472	2.5695	0.446769	0.0978299	0.433833	1.12047	0.301531	0.751661	-0.481929	-0.379202	-0.675812	-0.0402543	0.0988761	-0.545547	-0.416958
4970	opHsV0400008613	opHsV0400008613	-0.721147	-0.155577	-0.545875	-2.2573	-1.84931	-1.26316	-0.369212	-0.335993	-0.649388	1.94976	0.994842	1.66921	1.12042	1.38038	0.694795	0.0341477	-0.196042	0.130341	-0.410858	1.52982	-0.593365	-0.45325	0.149075	0.0906249	0.0267209	0.0171742	0.013158
21182	LOC392617	opHsV0400002548	-0.0215027	0.530346	-0.760764	-1.98192	-2.1228	-2.34781	-0.531664	-0.458033	-0.799539	1.40078	1.66754	1.39846	0.0114454	0.712287	0.795922	0.425262	0.386771	0.514819	0.266688	-0.910689	0.639109	0.390151	0.0570784	0.126403	0.28364	0.0878217	0.240209
22713	MYB	H300010969	1.44735	1.00222	-1.48017	-0.891933	-0.871437	-0.762498	-0.692547	-0.427323	-0.165358	1.14718	1.58784	1.57854	0.284361	1.2949	0.559987	1.02283	0.522332	1.00292	-0.722815	-1.75977	-1.58247	-0.425084	-0.449243	-0.0297873	-0.635403	-0.0600681	-0.494544
10395	ANKZF1	H300020872	0.205006	0.558329	-0.537188	-1.00434	-0.860893	-1.48295	-1.33903	-1.17744	-3.14602	-0.0861627	0.94122	0.815391	1.37127	1.27205	0.512817	0.507162	0.507172	0.926056	0.28805	-0.331424	0.551199	0.516491	0.291405	0.6359	0.290618	-0.485026	0.260343
35027	ZFYVE28	opHsV0400003778	-0.281355	0.454883	-1.13694	-2.01722	-2.3677	-2.3062	-0.665605	-0.553923	-0.325835	0.327113	0.57425	1.02482	1.20223	0.485181	0.461642	0.672397	-0.067466	0.11679	1.80188	0.804764	-0.135963	0.504432	0.0173584	0.466056	0.22808	0.242311	0.474019
12822	C9orf100	H300013388	-0.664023	0.820463	0.267487	-1.86704	-1.8566	-1.99374	-0.768427	-0.921915	-0.719204	1.52322	0.919323	0.926261	1.14037	1.23141	1.3153	0.819562	0.213195	0.124013	1.24453	-0.132649	0.0429999	-0.580862	-0.659395	-0.331085	0.315367	-0.285565	-0.122987
18876	HNRPC	H300018648	0.196179	-0.127255	0.692815	3.33826	2.43336	0.623307	0.619748	0.703001	0.54152	-0.880347	-1.06673	-0.57583	-0.62656	-0.587717	-0.515645	-0.890833	-0.723288	-0.223564	-0.138171	-0.758387	-0.797969	-0.523181	-0.71506	-0.373202	0.008098	0.151604	0.215848
30829	SLAMF9	H200010938	0.309685	0.607411	1.7431	1.30934	1.40326	1.49304	0.629672	0.735371	0.73706	-0.28571	-0.933208	-0.624767	-0.628577	-1.00104	-0.564258	0.358542	0.459522	0.528173	-1.2536	1.4544	-1.89494	-1.18233	-1.23219	-0.727544	-0.56094	-0.470864	-0.408604
13150	CASP2	H300017469	-1.12249	0.289915	-0.0490743	-0.179778	0.357043	-0.557219	0.636322	0.942029	0.575284	2.18845	0.949016	0.921061	1.67193	0.671429	0.822611	-0.0413681	0.026387	0.27763	-0.788147	-0.742457	-2.03266	-1.15089	-2.04671	-0.979352	-0.366477	0.0523129	-0.324787
2174	opHsV0400001327	opHsV0400001327	1.61802	2.39589	0.404344	-0.481156	-1.0691	-0.215295	-0.204604	0.319576	0.653572	0.328236	0.651314	0.383747	1.17748	1.47609	0.895736	0.5992	-0.0799495	0.257341	-0.894771	-1.02697	-1.19593	-0.930953	-1.5308	-1.40534	-0.82801	-0.579489	-0.718188
18716	HIST1H2BM	opHsV0400005403	0.882361	-0.0724492	-0.895474	-0.247118	-0.282082	-0.102388	-1.82556	-2.34493	-1.55935	0.638785	1.10341	0.878396	1.25901	1.18532	0.217661	1.15948	1.23852	1.23284	0.135027	0.0840195	0.108962	0.0488215	-0.00446061	0.17532	-0.891599	-1.2188	-0.903717
30383	SEC23B	H300010774	-0.762339	0.711365	-0.999791	-1.5828	-1.77852	-0.809688	-0.632522	-1.37611	-0.168454	0.495773	2.16201	1.72128	1.33481	1.36606	0.594581	0.342953	0.0635752	0.361547	1.09099	-0.0187591	-0.997612	0.223253	-0.838635	-0.397748	0.0847927	-0.158365	-0.031636
18338	GTF3C4	H200003133	0.186595	0.711479	0.385983	0.389522	0.516963	1.82486	1.09702	1.43457	1.89753	0.602232	-0.847126	-2.00382	-0.984159	-0.68883	-0.636519	-1.23236	-0.573274	-1.03255	0.0499496	-1.61162	0.463095	-0.714758	-0.666635	-0.268123	0.443292	0.544726	0.711943
24797	NUP98	H300021882	0.533838	-0.45427	0.660747	1.24658	0.889418	1.12189	0.596912	1.37948	0.407959	-1.21336	-1.4197	-2.12415	-0.996244	-2.18289	-1.29428	0.11418	0.507764	-0.330813	-0.210679	-0.328489	0.462558	0.0194967	-0.221806	-0.0214897	0.757379	1.18234	0.917637
3105	opHsV0400004759	opHsV0400004759	-1.11702	-0.385466	-2.1091	-0.31953	-0.723244	-1.13937	-1.30573	-0.778717	-0.913992	1.72681	1.70576	1.71007	0.672646	1.08765	0.826067	-0.308478	-0.237117	-0.415591	0.503717	-0.894973	-0.415938	0.481789	-0.276083	0.263333	0.532717	1.09421	0.735584
10939	ATP11B	H300000837	1.12563	0.358585	0.350719	1.85266	1.16001	1.30187	0.673378	0.36424	0.433929	2.23107	0.113786	-0.744639	0.0491985	0.539608	0.525659	-0.584932	-0.548504	-0.914808	-0.471618	-0.0951624	-1.39821	-1.37639	-1.27559	-1.49393	-0.67496	-0.992036	-0.509569
7176	opHsV0400011297	opHsV0400011297	0.152179	0.43299	0.661365	0.209436	0.26746	0.210483	0.735887	0.629345	0.580064	-1.72945	-1.84906	-2.42925	-1.5869	-1.58593	-1.21289	0.134328	0.248756	0.836811	-0.280175	0.70612	0.801573	1.14643	0.579211	0.339211	0.691498	0.67516	0.635352
33923	UBA52	H200001032	0.567918	0.990776	-0.247393	2.36334	2.04615	1.76	0.403405	0.23808	0.487457	0.261948	-0.0552346	-0.243715	0.654627	-0.0271887	0.253665	-0.630167	-0.887326	-0.798982	-0.130146	-0.19056	-0.778034	-1.3496	-1.81488	-1.56015	-0.581703	-0.214453	-0.517832
31646	SPARCL1	H200006105	0.413884	0.289914	0.239869	0.265533	0.98674	1.00199	0.376377	-0.115845	0.919056	-2.15169	-1.79296	-1.74165	-1.87042	-0.542212	-2.02398	0.221774	0.112853	0.581815	0.409144	0.88601	0.540872	0.145256	1.12959	0.119371	0.39158	0.473476	0.733658
32453	TBX6	opHsV0400006537	-0.847941	0.55113	-2.23784	-2.83185	-1.41537	-1.2971	-0.878427	-0.430945	0.230654	0.817558	0.354069	0.447879	0.424047	1.04304	0.380205	0.985309	0.592243	0.387983	1.0252	0.0108345	-0.354344	0.801228	0.533803	0.214789	0.340302	0.105607	1.04793
20997	LILRA6	H300003810	-0.380579	-0.0755589	1.98401	-0.495704	0.125569	0.372334	0.0880242	-0.285037	0.483604	-1.21556	-1.35416	-0.416574	-1.65703	-1.90224	-1.73284	0.0553986	-0.131323	-0.374161	-0.0122195	2.00847	0.542324	0.407316	0.781886	0.803123	1.12047	0.195657	1.06479
33846	TXNDC11	H200017200	0.327035	0.652286	1.39557	1.99028	1.45363	1.6103	0.16733	-0.0131187	0.0681239	-1.39431	-1.4305	-1.07556	-0.918896	-1.26443	-0.710121	-0.488637	-0.711259	-0.273829	-0.296308	0.987049	-0.104323	-0.480886	-0.445417	-0.35636	0.371559	-0.88888	1.82968
19810	ITGB1BP1	H300018981	0.148941	0.822249	1.66593	1.25443	1.45169	1.31946	0.469991	0.634579	0.595904	-1.80472	-1.2915	-1.1408	-1.2512	-1.86014	-0.948883	0.302887	0.377743	0.0910993	0.3011	1.46347	-0.275422	-0.944932	-0.509022	-0.000948498	-0.380299	-0.196368	-0.295224
10178	ALS2CL	H300000658	-1.01438	0.296703	-0.750712	-0.938752	-0.769382	-0.786775	-0.555933	-0.295183	-0.385157	1.73767	1.94739	2.18429	1.37967	2.22757	0.861838	-0.275013	-0.39161	-0.486748	-0.0109186	-0.548391	-0.474154	-0.398148	-0.636794	-0.577751	-0.487604	-0.453327	-0.398397
6612	opHsV0400010653	opHsV0400010653	1.95007	-0.726611	0.241935	0.414712	0.717994	0.472113	0.339347	0.069248	1.92339	-0.766821	-1.54581	-1.42776	-1.79093	-0.885375	-1.0898	-0.633111	-0.653115	-0.371337	-1.29891	0.695418	0.832301	0.381304	0.881694	0.839714	1.01392	-0.0311112	0.447524
10403	ANP32E	opHsV0400010996	1.05531	-0.182382	0.628576	1.06631	0.495012	0.815704	0.734288	0.920455	0.254646	0.761208	0.933211	0.369704	-0.0726885	0.0217957	-0.220488	0.439926	0.545158	0.53592	-0.862483	-3.76612	-0.997272	-0.298404	-0.298788	-0.348372	-1.02973	-0.493262	-1.00723
27741	Q6P5R4_HUMAN	opHsV0400005193	2.28302	1.14047	0.247135	0.551998	4.1655e-05	0.222143	0.721741	0.183351	0.236469	-2.32355	-1.40818	-1.71034	-0.0615404	-0.780791	-0.421673	-0.161856	-1.11395	-1.15618	1.66965	0.515805	1.11097	-0.457198	0.267819	-0.106337	0.0406585	0.409158	0.101161
2815	opHsV0400003740	opHsV0400003740	0.544	0.65762	-0.952448	1.34072	0.134144	-0.04443	0.170347	-0.330783	-1.20428	0.972012	0.865481	0.847093	1.06952	0.830167	0.357457	0.455378	1.71921	0.700542	0.75357	0.185837	-0.843418	-1.26895	-1.19082	-1.07417	-1.44742	-1.81258	-1.4338
11018	ATP6V1E1	opHsV0400009284	0.108874	0.767701	1.27668	2.33211	2.17877	0.540878	0.475745	0.391606	0.951089	-1.08663	-1.49099	-1.5475	-0.414972	-1.00937	-0.0463602	-0.166166	-0.159177	-0.202136	-0.308668	1.31989	-0.987662	-0.854298	-0.761135	-0.825126	-0.0248047	-0.307337	-0.151019
31401	SMR3B	H300003533	-0.328624	0.146208	0.176824	-0.0938715	0.120252	0.375192	-0.165329	0.303983	0.113125	-1.55417	-1.27944	-1.1832	-1.80129	-1.94582	-1.90596	-0.102042	0.300758	1.18794	0.224558	0.643422	0.476683	1.5027	0.818631	1.10934	1.06455	0.498455	1.29712
2414	opHsV0400002236	opHsV0400002236	-1.63821	0.216772	-0.434654	-0.678565	-0.130179	-0.37897	-0.379074	-0.437252	-0.270066	1.75119	1.85397	2.05842	1.84692	1.77639	0.352461	0.14327	-0.607547	0.0226767	-0.172792	-0.354401	-1.57211	-0.477536	-0.681019	-0.613799	-0.247403	-0.581324	-0.367156
5599	opHsV0400009488	opHsV0400009488	-0.421905	0.912416	-2.20866	-0.0799983	-0.72259	-0.683168	-0.335214	-0.4277	-0.321654	1.86126	1.84521	2.02091	0.617518	1.1195	0.830611	0.498336	0.0214965	0.391789	-0.674448	-1.17418	-1.28735	0.232892	-0.754878	-0.437063	0.132129	-0.118692	-0.836558
11596	C10orf31	opHsV0400001041	-2.06005	0.0291166	0.47754	1.08089	0.184257	1.07158	0.293044	0.0870402	-0.141081	-1.52503	-1.44096	-0.847395	-1.55597	-1.01071	-1.05767	0.766538	-0.529253	-1.24124	0.368739	0.54268	1.06164	1.20025	1.2596	1.08527	0.692008	0.581083	0.628096
13288	CCDC23	H300009003	2.15892	0.985301	-0.88082	1.88746	1.69324	1.13316	0.751648	0.614584	0.399981	-0.154062	-0.451152	-0.394556	-0.159517	0.130781	0.0262215	-0.232285	-0.0399086	-0.579037	0.157288	-2.48641	-0.59061	-0.739365	-0.722312	-0.552165	-0.633947	-0.0473255	-1.27511
978	H300004924	H300004924	0.547431	0.123098	-1.42684	-1.21959	-1.42414	-1.80099	-0.773684	-0.947469	-1.12594	0.226008	0.952138	1.23642	0.171622	0.079965	0.0430209	1.45008	1.68628	2.06453	-0.150627	-0.250817	-0.437161	0.394153	0.450961	1.09372	0.0185499	-0.691127	-0.28959
11760	C12orf49	H200012239	-0.0541202	0.25584	1.81272	2.12103	1.71098	2.19392	-0.147888	0.0504638	0.965269	-0.589601	-1.31556	-1.31176	-0.34654	-0.725569	-0.334811	-0.625322	-0.431484	-0.814086	-0.998335	1.10097	0.119095	-0.582332	-0.838145	-0.336298	-0.259264	-0.398382	-0.220789
14061	CIB2	H300019445	-0.524269	-0.979448	0.66396	-1.6823	-1.72527	-1.71107	-0.643586	-0.511548	-1.18423	0.768095	1.20466	1.23758	1.43369	0.823383	0.698408	0.32943	0.698839	0.425092	-0.75022	2.033	-0.968326	0.0575715	-0.0637987	0.160303	0.377586	-0.326024	0.158493
12386	C20orf32	opHsV0400003513	0.4866	-0.901699	0.933887	-0.239117	-1.31521	-0.613857	-1.01571	-2.06341	-2.30384	-0.999543	-0.525402	-0.0880825	0.545919	0.0935998	0.433684	-0.451763	-0.393982	-0.255303	0.449631	1.31685	1.30888	0.959441	0.815718	1.30988	0.975373	0.644964	0.892482
3364	opHsV0400005528	opHsV0400005528	-0.802744	0.0215138	-1.1972	-0.663772	-0.798093	-0.35177	-0.462027	-0.479997	-0.503108	1.40699	1.93483	1.82512	0.77922	1.54264	0.78877	0.434251	0.183348	0.28969	2.01228	-0.309711	-0.847891	-0.951481	-1.15846	-0.896057	-0.761511	-0.406919	-0.627914
31447	SNED1	H300020827	-1.18544	-0.281404	-0.209703	-2.75135	-1.9557	-1.71192	-0.210451	-0.349395	-0.136483	0.567619	0.267818	0.389756	0.229522	0.19689	0.0504167	0.0610434	-0.129866	0.371221	1.03729	1.53852	0.470457	0.982201	0.77011	1.90354	-0.415718	0.34811	0.152912
31032	SLC27A5	H200011751	-1.01602	-0.0461789	-0.474081	-2.37795	-2.16628	-2.23006	-0.338625	-0.309935	-0.0687863	1.18163	1.04879	1.96392	0.0680308	0.969233	0.441672	0.189762	0.0742889	0.178081	0.228913	-0.218816	0.186379	0.771135	0.568871	0.581232	0.416889	0.227306	0.150602
22646	MTRF1	opHsV0400000143	1.38687	0.516197	1.45967	-0.309812	2.51891	1.20401	0.73953	1.08953	0.555211	-0.204844	-0.59792	-1.86111	0.455443	-0.013488	0.329985	-1.23545	-0.819595	-1.51422	0.0337957	0.255189	0.0114779	-0.863782	-0.345854	-0.761488	-0.727753	-0.343013	-0.957488
11427	BOLA3	opHsV0400006925	2.00461	1.45068	1.21031	1.55386	1.15396	1.39551	0.395234	-0.0580491	0.0220029	-0.985308	-1.03178	-1.01854	0.157805	0.194712	-0.192752	-0.133077	0.177621	-0.625	0.508244	0.615504	-0.758737	-0.983386	-1.16351	-1.33765	-1.44977	-1.22704	0.124545
10836	ASGR2	H300009309	0.98251	-0.201706	0.246516	0.00145949	-0.0289026	-0.747528	-0.797423	-0.503636	-0.88618	1.57269	1.81604	1.16167	-0.0243859	0.235113	0.142307	1.23064	1.1061	1.53243	-0.207755	-0.166764	-1.67745	0.141971	-0.340134	-0.0557401	-1.71789	-0.916371	-1.89759
18	2007-09-01	H200014272	0.438573	0.109372	0.700964	2.76334	2.11527	2.08277	0.27466	0.421083	0.310903	-0.191633	-0.648042	-1.44435	-0.299882	0.296889	-0.0830927	-0.765834	-0.785508	-0.560491	-0.0892218	-0.122669	-0.710408	0.186425	-0.610421	-1.33315	-0.487739	-0.986192	-0.581621
27754	Q6PID2_HUMAN	opHsV0400004947	0.492568	-0.124325	0.906165	2.50967	2.12518	1.91487	0.0299569	0.630618	-0.248283	-1.65756	-1.06779	-1.33561	-0.593503	-0.843362	-0.343795	-0.75196	-0.377927	-0.731657	0.737472	-0.690863	0.622915	-0.062252	-0.476985	0.101618	-0.395632	-0.127956	-0.241566
1373	H300010063	H300010063	-0.443466	0.37917	0.88623	1.98518	2.74657	1.47211	0.559041	0.360714	0.681947	-0.396035	-1.21543	-1.30369	0.0662217	-0.130878	-0.418326	-1.30691	-1.283	-1.14048	-0.347875	0.581192	-0.95649	-0.813852	0.0455318	-0.0672377	0.250985	-0.149674	-0.0415541
13858	CEP55	H200002395	0.771549	0.0199555	0.493043	0.476938	-0.00909848	-0.205353	1.19516	1.58874	0.698547	0.2932	0.549526	0.403802	-0.795693	-0.434374	-0.738213	1.54628	1.85996	1.4924	-0.933356	-1.15266	-0.998	-0.775292	-0.559198	-0.590104	-1.49309	-1.11685	-1.5878
10149	ALKBH3	H300002295	1.11831	0.451383	-0.419774	2.62466	1.45871	0.949885	0.270175	1.29981	0.763932	-0.49955	-1.05154	0.62884	-0.524916	-1.49364	-0.527181	-1.31465	-1.41512	-1.1183	-0.0735889	0.3302	-0.329589	-0.48478	-0.667447	-1.08485	0.62422	0.232684	0.252088
33582	TRPC4	H200016524	-0.972149	-0.880978	0.0607462	-1.04638	-1.1438	-1.44151	-0.730254	-0.804454	-0.383461	0.653723	1.18838	2.00951	1.85431	2.45959	0.844727	-0.17051	-0.0552996	-0.283779	0.822187	-1.15711	-0.0966221	0.168784	-0.171709	-0.0025018	-0.145925	-0.235789	-0.339723
31528	SNX30	opHsV0400000437	-0.13763	0.117406	1.73628	1.89719	1.95096	1.48171	0.497944	0.919464	0.432606	-0.594734	-1.50102	-0.493273	-0.688322	-0.793693	-0.461725	-0.573813	-0.793715	-0.64627	-2.08754	0.983308	-0.0486504	-0.580243	-0.662638	-0.524554	0.328035	0.19899	0.0439385
34038	UBXD6	H300020028	1.30944	0.425791	1.59379	1.6339	1.96705	0.444067	-0.928178	0.308281	0.389867	-1.22908	-2.38586	-1.52558	-0.711479	-0.751406	-0.797077	-0.657795	0.293449	-0.855015	-0.137927	-0.58469	0.597063	0.0482291	0.342043	0.246079	0.414552	0.196934	0.353544
35248	ZNF304	H200008910	0.197744	-1.37002	0.280539	0.6068	1.12032	0.43783	1.15184	1.47254	1.23486	-0.989818	-1.31942	-1.0059	-1.34481	-0.922472	-0.703238	-1.42057	-1.10514	-0.388339	-0.814997	-0.780528	0.498153	0.159053	1.03303	0.644792	0.823728	1.0936	1.41044
20162	KIAA0317	opHsV0400002902	-0.339123	-0.835161	1.00912	1.82123	1.77695	1.62981	0.0348448	-0.104159	0.291661	-0.50698	-1.39931	-1.96999	-0.576423	-1.26738	-0.671599	-0.959555	-0.764764	-1.06991	1.34143	0.335074	0.494514	-0.393708	-0.115922	0.186617	0.763264	0.518227	0.771238
27690	Q68DG8_HUMAN	opHsV0400008791	0.24378	0.845609	0.85908	0.466082	-0.407661	-0.588653	-0.0751722	-0.116441	0.0689357	1.25898	0.99529	0.640271	1.34161	1.16185	1.52152	0.156078	-0.363071	0.545999	-2.5928	0.63926	-1.25912	-1.10338	-1.50687	-1.39365	-0.269969	-0.673757	-0.393783
22769	MYL1	H300021245	0.176629	-0.634232	-0.495762	1.21275	0.633154	1.3692	0.0595907	-0.0341714	-0.694232	1.36181	0.752092	1.17957	1.3733	0.947579	1.25576	0.328826	0.113533	-0.243138	-1.23344	0.240369	-2.37288	-0.232868	-1.3125	-0.67021	-1.2468	-0.739023	-1.09491
35212	ZNF264	H200012033	0.119001	-0.936047	1.59829	-1.33804	-0.88471	-0.68062	0.10601	0.630652	0.29946	-1.07278	-0.949268	-0.443854	-0.434218	-0.830277	0.425982	-1.68361	-0.881249	-1.51806	0.463618	0.709497	1.82216	0.585034	0.736835	0.51927	0.859987	1.44962	1.32733
17053	FEM1B	H200001139	1.0978	0.677664	0.899286	2.41583	1.33919	0.745373	0.348201	0.465087	0.850038	-0.522352	-0.270016	-0.848359	0.603033	-0.957498	-0.124156	-1.42081	-1.52404	-1.63236	0.0405154	0.927036	-1.20029	-0.465021	-0.480972	-1.40907	0.130597	0.394983	-0.0796881
34618	WFDC10A	H300000571	-1.61975	-0.375381	-0.713	-1.06416	-0.829149	-0.635176	-0.554481	-0.258114	-0.359246	1.58176	1.95861	2.30089	1.21527	2.04282	0.599834	-0.216225	-0.514379	-0.0217383	0.00905597	-0.505664	-0.903431	0.415337	-0.20352	0.0778738	-0.610304	-0.25398	-0.563766
31079	SLC31A1	opHsV0400006065	0.0963845	0.307072	1.55464	1.68098	1.50725	1.41201	0.209612	0.796637	0.939445	-0.608812	-0.423412	-0.666756	-1.38403	-2.28743	-1.25812	-0.25266	-0.13801	-0.321784	-0.628266	1.57965	-0.160212	-1.08467	-0.52871	-0.628468	0.310014	0.150731	-0.17309
8291	opHsV0400012509	opHsV0400012509	1.42223	1.32077	1.38673	1.35546	-1.49141	0.175215	-0.131473	0.647014	0.799894	-0.842693	-1.23065	-0.755462	-1.21064	-1.21917	-1.52868	-0.981691	-0.607613	-0.786153	1.33391	-0.405959	0.384071	-0.0735286	-0.139715	0.00581556	0.384264	0.622768	1.56669
11441	BPY2C	opHsV0400006158	0.896324	-0.89511	2.01389	0.891881	1.18294	1.09906	1.44966	0.631757	-0.240381	-0.0359375	0.885518	0.445941	-0.113161	-0.223617	0.486491	0.378216	0.0177067	-0.186281	-0.831765	0.215181	-1.47486	-0.144039	-1.39572	-1.88897	-0.733376	-0.518273	-1.91308
31587	SOX3	H200014144	0.11988	0.488066	-0.785333	0.319099	0.508619	0.0219848	-0.847262	-1.98676	0.021794	1.19981	1.34618	1.08304	1.35505	0.937534	0.916606	0.958867	-0.64311	1.68512	-1.24903	0.622067	-0.877887	-0.380846	-1.04815	-0.834037	-0.765231	-0.657072	-1.50901
11578	C10orf119	H200008452	0.66004	0.103693	0.501807	2.60246	1.62098	1.78137	0.334028	-0.471866	0.748019	-1.13007	-0.665793	-0.695109	-0.877059	-0.962255	-1.10579	-1.3515	-0.984758	-0.317455	0.922456	-1.54644	0.265915	0.250828	0.169142	-0.464383	0.285672	-0.0112477	0.337331
29691	RNF141	H200004722	0.618482	0.329576	-0.16733	1.24913	1.09711	0.386136	0.479231	0.724005	0.527896	-1.82415	-2.08746	-1.92918	-1.69702	-1.82373	-1.21718	0.396865	0.472028	0.517378	0.596797	0.403691	0.495897	0.276723	0.395639	0.411873	0.462634	0.482801	0.422153
8899	opHsV0400013181	opHsV0400013181	-1.1586	-0.425718	-0.398618	0.749399	0.100558	-0.553115	-0.0385037	0.00838195	0.339451	1.65445	1.37573	1.39507	1.05849	2.03189	1.21997	0.45812	-0.407548	-0.199774	0.591869	-1.87656	-0.680584	-0.93404	-1.36313	-1.19362	-0.403044	-0.796009	-0.554522
29308	RBM25	H300019635	2.20838	0.430724	1.13129	0.710814	2.07629	0.788376	0.302303	1.28285	0.292107	-0.854151	-0.252319	-1.59639	0.257119	0.629378	0.664855	-1.51569	-0.979473	-0.996767	-0.139618	-0.808773	0.354758	-0.8192	-0.207928	-0.66398	-0.555831	-0.619066	-1.12005
15343	DENND1A	H300013263	-1.96172	-0.127922	-1.41909	-0.686253	-1.11186	-1.74836	-0.256412	-1.52019	0.490667	2.03729	1.10451	1.67836	1.20237	0.448542	0.560484	0.136283	0.460581	-0.0486076	0.69136	0.693081	-0.514371	0.704347	-0.777476	0.0991128	-0.134927	-0.0594595	0.059673
25878	PDE6B	opHsV0400000230	-0.913778	1.2752	-0.442003	-1.72089	-1.48194	-1.44678	-0.59335	-0.0188331	-0.178764	1.38601	1.86371	1.18583	0.872362	1.68608	1.09403	0.548185	0.0966087	0.426679	-0.126906	0.704333	-1.18581	-0.311412	-0.579942	-0.270745	-0.488479	-0.697511	-0.681877
16784	FAM63B	H300014787	-1.173	0.834454	-0.71154	-1.78931	-1.62661	-1.49447	-0.360363	-0.427182	-0.201114	0.850007	1.03957	2.58323	0.29004	1.58065	0.617675	0.911019	0.61494	0.240579	0.536813	-0.582016	-0.602283	0.00946738	0.11839	0.397444	-0.203291	-0.832674	-0.620437
2030	opHsV0400000536	opHsV0400000536	-0.348178	1.0665	-0.0878382	-1.98437	-2.09688	-2.01837	-0.723092	-1.12431	-0.740834	0.459407	0.789113	0.854215	0.453441	0.660908	0.581523	1.26467	1.70621	1.14835	0.632157	-0.485289	-0.211941	-0.329583	-0.595599	0.00356511	0.541891	0.227546	0.356792
19669	INTS12	H200003625	-0.119115	-0.138869	1.54478	1.47783	0.4003	1.2849	0.43871	0.857055	0.72451	-0.753899	-2.57346	-1.98112	-0.906825	-1.54855	-0.886777	-0.190189	0.398713	-0.487072	0.525225	-0.171064	1.31659	-0.236666	0.321228	0.332087	0.0855122	0.476159	-0.189982
10678	ARID3C	H300007094	-0.464659	0.0192378	-1.13907	-0.795482	-1.01159	-0.600911	-0.276115	-0.674968	0.0160101	1.51799	1.10597	1.18892	1.30397	2.51984	1.7009	-0.20725	0.0516897	0.0352014	0.563762	-1.53227	-1.52786	-0.573456	-0.635491	-0.284681	-0.375318	0.193724	-0.118093
11491	BRWD2	H300010239	-0.441082	0.314196	1.05132	1.98398	1.32812	1.78055	0.0760988	0.452353	0.439382	-0.954174	-1.33115	-1.15073	-1.04404	-2.57045	-1.03842	-0.309712	-0.196348	-0.115875	0.44344	1.35279	-0.30806	-0.277668	-0.0100542	-0.134193	0.359553	0.0936819	0.206492
941	H300004510	H300004510	-1.01156	0.0826411	0.227108	0.219803	-0.0369937	-1.3998	-0.482945	-0.674542	0.789788	-0.815291	-1.52336	-1.57197	-1.67298	-0.131885	-0.635347	0.0174306	-0.0866644	-0.176471	0.272916	1.85889	0.305402	0.961581	2.39524	0.63881	0.52193	0.794837	1.13342
1046	H300005980	H300005980	-0.791761	0.673872	-1.48199	-1.7478	-1.41082	-0.919553	-0.0264338	-0.531045	-0.848343	0.987753	1.48986	2.09648	1.20149	0.995933	1.0599	0.063136	0.505449	0.259963	-0.273302	0.11351	0.284658	0.326525	0.478839	0.0523866	0.00872681	-0.759379	-1.80805
19252	IARS	H200008082	0.653406	0.658025	-0.308231	2.45679	2.13077	2.20488	0.336347	0.403405	0.54387	-0.511091	-0.907982	-1.87245	0.170979	0.0100796	-0.478305	-0.805138	-0.789529	-0.77268	0.00538036	0.194503	-0.739167	-0.630322	-0.930372	-0.601807	-0.197685	0.0365294	-0.260205
10874	ASZ1	H300001484	-0.36582	0.149024	2.03467	1.67337	1.89801	1.18492	0.924128	0.309792	0.470287	-0.975925	-0.0411453	-0.591738	0.216034	-1.21845	-2.10779	-1.05022	-0.320996	-1.57526	0.02369	0.215776	-0.0596484	-0.118644	-0.0481673	-0.0962856	-1.13077	0.635881	-0.0347255
23899	NP_060164.2	H200003277	0.34063	-0.865134	0.576194	-0.505647	-0.403653	0.394847	-0.484455	-0.990622	-0.499506	-1.79149	-0.939056	-1.00486	-1.25687	-1.5502	-1.33479	0.826035	0.5339	0.0302078	0.261626	1.14954	1.34181	0.770403	1.5302	1.22517	1.32463	0.0791845	1.24191
3293	opHsV0400005279	opHsV0400005279	0.628361	0.618793	1.4645	-0.6026	0.176689	-0.273018	0.632665	0.459261	0.769801	-1.4449	-1.45625	-1.48165	-1.19615	-1.31255	-0.509549	-0.974726	-0.0933438	-0.71913	-1.59069	0.0725886	1.30865	0.314197	1.12028	1.12703	1.17442	0.530773	1.25655
24744	NUDT14	opHsV0400003245	-0.523642	0.283087	-1.15097	-2.03635	-2.2531	-1.03939	-0.290939	-0.296858	0.0451729	1.11177	1.8353	2.44488	0.771615	1.09179	0.650239	0.375739	-0.0365691	0.313603	-0.116013	-0.771805	-0.413775	-0.0114674	-0.137839	0.0538125	-0.0101901	0.0335742	0.0783275
3463	opHsV0400005861	opHsV0400005861	-0.0451101	-1.17819	-1.6626	0.434397	0.150964	-0.611475	-0.838392	-1.21484	-0.724194	0.646432	0.376903	2.12112	1.91069	1.91175	1.38755	0.150868	0.462183	0.167528	-0.491312	0.323961	-1.32894	-0.734362	-0.392683	-1.07275	-0.0457642	0.149554	0.14671
34869	ZBTB38	H300008384	-0.00863571	0.264577	0.416955	2.23572	1.08915	1.57881	0.377182	0.534504	-0.621955	-0.417744	-0.804169	-1.3434	-0.0994912	-0.32269	-1.04937	-1.68888	-1.71696	-1.65788	0.757283	1.66891	-0.366259	-0.0529654	0.390328	0.0534238	0.261355	0.16513	0.357085
20180	KIAA0427	H200005539	-0.725892	0.0088205	0.0858857	-1.04872	-0.712961	-0.886373	0.735281	1.75987	-0.109422	-1.47122	-1.15925	-1.17219	-1.63325	-0.660843	-0.944792	-0.0792277	0.237266	-0.622858	1.46882	0.776508	1.69735	0.136049	0.509656	0.43076	1.03852	1.45888	0.883336
24668	NSMCE1	H300013387	0.123078	-0.742891	-0.0293631	-2.07232	-2.59482	-2.31037	-0.626633	-0.981653	0.105774	1.28152	0.731624	0.882477	1.00426	0.698736	0.261496	0.353863	0.323959	0.188057	1.34178	0.0123383	0.442481	0.443698	0.145458	0.388627	0.550678	-0.307709	0.385852
18274	GRTP1	H300017123	-0.991895	0.566403	-2.02638	-1.05612	-0.6412	-0.449718	0.169593	-0.300587	-0.000463255	1.49361	2.01867	2.16221	0.635174	1.16742	0.873804	0.552072	-0.140581	0.464548	0.684346	0.0651103	-0.472447	-1.06768	-0.897779	-0.675304	-0.504943	-0.892315	-0.735556
948	H300004563	H300004563	-1.23598	-0.225114	0.654642	-2.30343	-1.94144	-1.50895	-0.64724	-1.01294	-0.482741	0.689144	0.836123	0.701815	0.688906	2.17305	1.82702	-0.166211	0.0341532	0.224076	0.124329	0.672331	0.139768	0.181255	0.278602	-0.0462164	0.208777	0.191394	-0.0551177
22949	NCAPD3	H200002275	-0.202803	-1.33028	-0.970177	0.59127	0.622396	0.17248	-0.353706	0.0177603	-0.0916149	1.2646	1.1064	2.62511	0.242062	0.641659	0.0470485	0.906411	0.607683	1.21042	-1.17345	-2.29644	-1.14236	0.123232	-0.608139	-0.258559	-0.367217	-0.739849	-0.643949
27476	Q2M368_HUMAN	opHsV0400005689	-0.237318	0.514143	-0.869581	0.678631	0.418615	0.534583	-0.601316	0.223366	-1.52958	-0.727887	-0.655597	-0.93938	-1.01565	-0.480517	-0.574877	-1.0542	-0.978	-1.09631	-0.276496	0.530954	2.30861	0.351995	0.581167	-0.0416278	1.29455	1.61183	2.02991
4887	opHsV0400008523	opHsV0400008523	0.213841	0.638156	-0.685615	-0.0731377	-1.57247	-0.870454	-1.48051	-1.241	0.244665	0.827867	0.343001	0.969028	0.85968	1.24454	0.875645	1.68434	0.904591	1.5168	0.66534	0.0917207	-0.848136	-0.448168	-1.60643	-0.416842	-0.288813	-1.74595	0.198291
21154	LOC387885	opHsV0400002986	-0.967049	0.045206	-0.786384	0.0266016	-2.04808	-1.42385	-0.792435	-1.07151	-0.642482	2.11883	0.263069	0.471313	0.789214	1.48224	1.16301	0.795289	0.73271	0.472353	1.43359	-0.296038	-1.0925	0.798017	-0.39251	-0.567964	0.390117	-1.03319	0.132429
5861	opHsV0400009777	opHsV0400009777	-0.95641	0.411829	-0.508864	-1.45562	-1.18641	-2.40907	-0.240571	-0.351301	-0.243866	1.13923	1.67443	2.27565	0.969983	1.67975	0.383409	0.269272	0.0635656	0.283762	0.843901	-0.592784	-0.376557	-0.074358	-0.344327	-0.321159	-0.402243	-0.221755	-0.309495
26802	PPP2CA	H200010513	1.86499	0.191969	0.938489	2.29712	2.43104	0.620104	0.443545	0.266366	0.153472	-1.19444	-0.681434	-1.23565	-0.328548	-0.0351955	0.237392	-0.954286	-0.505714	-0.470919	-0.370696	0.710394	-1.42125	-0.364956	-0.911568	-0.882434	-0.57088	-0.0309154	-0.196001
14025	CHRNB1	H200010386	-0.854307	0.0521913	-0.520599	-1.89178	-2.46503	-2.08301	-0.267512	-0.456316	0.0861543	0.579972	0.71064	1.63244	0.000581048	1.27712	1.18905	0.69046	0.612635	0.821059	0.810518	-0.257803	0.108476	0.744482	0.224421	0.436114	-0.136644	0.00026546	-1.04358
29953	RPS6KA4	H200011381	0.179769	-0.283037	0.277694	-1.45194	-1.65903	-1.31397	-0.439601	-0.945165	0.303066	-0.225192	-1.32266	-0.417388	-0.0127044	-0.191217	-0.704791	0.21225	-1.11595	-0.0817972	1.65248	-0.60682	1.8242	0.408303	1.05945	1.83928	1.07755	1.19653	0.740665
31629	SPAG6	H200007301	0.737541	-0.014327	1.778	2.15611	0.0511357	0.299431	1.45913	0.979439	1.77789	-0.419163	-0.995117	-0.203916	-0.972696	0.0400106	-0.527666	-0.99786	-0.213721	-0.634598	-1.60784	-1.2621	0.429341	-0.00682055	0.507038	-0.257572	-0.754928	0.121533	-1.46828
9745	ACTN3	H300003080	-1.16523	1.19528	-0.756242	-1.64333	-0.49478	-1.11347	-0.758155	-0.833548	-0.353277	1.59385	2.00824	1.97482	1.32222	1.24312	0.286908	0.351164	0.0306215	0.283643	0.6522	-0.331996	-0.937556	-0.346426	-0.864404	-0.711448	-0.238743	-0.403826	0.0103631
32658	TH1L	H200001009	0.264813	-0.482217	-1.93365	0.266953	0.0850239	-0.431893	-1.70151	-0.954515	-1.41967	1.32664	1.47997	1.56685	1.37256	1.36189	0.854807	0.294404	0.343598	0.392285	-0.269913	-1.18789	0.41518	-0.187292	0.567687	0.544668	-0.682792	-1.14711	-0.738884
16356	EPN1	H200017570	-0.654972	0.612082	-1.06065	-2.48879	-1.00187	-2.00415	-0.533021	-0.231358	0.183825	0.51612	0.869577	1.11287	1.1363	0.131375	0.505971	1.43339	1.28605	1.62624	0.168367	-0.0287974	-1.08035	-0.641169	-0.19279	-0.555172	0.463037	0.369014	0.0588642
28821	Q9NSZ8_HUMAN	H200017015	0.0414971	0.176132	1.0801	2.25317	0.797824	0.24544	0.460802	0.940194	0.566313	-0.956387	-2.38311	-0.588072	-1.90132	-1.62741	-1.14508	0.443133	-0.316061	-0.432529	-0.200571	1.07854	0.48402	0.62997	-0.385187	-0.419696	0.364351	0.448512	0.345414
6538	opHsV0400010574	opHsV0400010574	-1.60398	0.0571949	-0.805524	-1.63133	-1.29313	-1.31851	-0.582627	-0.186458	-0.237315	1.36626	1.69549	1.89346	1.08064	2.17844	0.455211	-0.104202	-0.227616	0.00244853	1.0268	-0.283077	-0.279256	0.286506	-0.316025	-0.210614	-0.318577	-0.235178	-0.409025
12433	C21orf2	H300020737	-0.773888	0.431268	-1.2245	-1.68038	-1.97197	-1.59298	-0.45256	-0.251656	0.127169	1.09169	1.12903	0.990921	1.35028	1.52706	0.799077	0.585033	0.354186	0.662951	1.45712	0.638592	-1.29266	-0.0426543	-0.563096	-0.492327	-0.321167	-0.0867673	-0.397765
19746	IRGQ	H300005604	-1.23385	-0.19515	-1.1446	-1.30978	-1.24168	-1.01818	-0.508912	-0.130499	-0.248115	2.01119	1.37296	2.58974	1.13812	1.09421	0.63161	0.097291	-0.227854	-0.00722483	1.03917	0.210028	-0.41616	-0.149779	-0.381067	-0.0731244	-0.319532	-1.00114	-0.577669
1050	H300005998	H300005998	-1.39813	-0.735952	-2.57131	0.182194	-1.18567	0.124147	-0.129516	-1.7967	-0.616463	1.27163	1.36233	1.13366	0.1691	0.0969348	0.629157	-0.0300889	2.18109	1.04708	0.252087	0.336478	-0.0483317	0.0909771	-0.0922651	0.419812	-0.354208	-0.494141	0.156102
295	H200007952	H200007952	0.521942	0.888142	-0.73632	1.67544	0.273419	1.24327	0.464207	0.615413	1.45863	-0.414619	-0.159928	0.335648	0.813187	-0.349018	-0.111564	1.51799	0.433313	0.495049	0.520156	-0.215129	-1.37773	-1.34055	-1.66553	-1.72415	-0.839426	-0.810547	-1.51129
7852	opHsV0400012037	opHsV0400012037	-0.142303	-1.395	-0.649783	-0.755535	-0.744186	-0.619752	-0.239318	-1.08862	-2.51104	1.77876	1.42709	2.02168	0.97004	1.52216	0.0136071	0.204391	-0.336517	0.240049	0.806352	0.0145623	-0.280595	0.092587	-0.447738	-0.174936	0.101526	-0.535775	0.728272
34819	YV009_HUMAN	opHsV0400003112	0.563989	0.0600257	0.781949	1.51182	1.82787	1.91029	0.150228	0.324078	0.0822488	-1.32308	-1.3398	-1.22882	-0.910831	-1.3641	-1.05305	-0.560176	-0.52101	-0.300417	2.25866	-0.238184	0.533237	0.179727	0.0404141	-0.0356711	-0.412477	-0.328314	-0.6086
30790	SIRT3	opHsV0400001325	-0.542389	0.643668	-0.909889	-1.11119	-1.06854	-0.621988	-0.759	-0.667246	-2.75954	1.55617	1.28045	1.75067	1.75221	1.23162	0.803966	0.00407861	-0.223218	0.0297536	-0.0151546	0.240016	-0.660875	-0.0803562	0.268055	0.179674	-0.0427951	-0.202086	-0.0760624
13936	CHCHD7	H300022486	0.790289	0.230643	-0.144725	2.25553	1.993	2.39669	0.554157	0.719876	0.225485	-0.333469	-0.202858	-0.829775	0.314034	0.676298	0.623548	-1.00175	-0.876628	-1.1663	-0.766669	-0.493287	-0.284729	-0.889816	-0.853738	-0.761623	-0.994016	-0.646017	-0.534149
29134	RAD51C	H300014792	2.08044	0.686981	-0.0658598	2.01542	2.30117	0.0471024	0.674517	0.939455	0.469665	-0.985808	-0.98846	-0.76949	-0.10424	0.425088	0.0549571	-0.8793	-0.34548	0.110525	-0.64009	-2.13215	0.000255039	-0.252583	-0.185796	-0.803529	-0.541491	-0.439207	-0.672084
13949	CHD7	H300004761	-0.581696	0.233995	0.172012	-2.66221	-1.9307	-2.27844	-0.306475	-0.750266	0.140298	0.654999	1.10747	1.10411	1.21282	1.49409	0.473764	0.585176	0.509775	0.890745	0.371812	-0.33751	-0.323528	-0.161026	-0.353052	0.226228	0.0356799	0.348495	0.123442
32365	TBC1D10B	H200001400	-0.434331	-0.886029	-2.54097	-1.58928	-0.0650141	0.114036	-0.336611	0.0074101	-0.0763976	-0.908245	-1.26084	-0.662933	0.0701223	-0.205479	-1.35264	-0.167769	0.437933	0.733761	1.18719	1.43576	1.32901	0.167897	1.21246	1.19672	0.826241	0.935154	0.832844
6069	opHsV0400009993	opHsV0400009993	-0.568893	-1.36268	-0.713074	-2.48666	-1.70512	-1.72977	0.139934	0.128708	-0.889603	0.452147	0.864598	0.499467	0.449197	1.12638	-0.627709	0.150257	0.594185	0.262063	-0.519475	0.957222	0.746254	0.693942	0.518465	0.774065	1.02256	-0.389106	1.61263
30576	SFMBT2	H300014437	-0.380354	-0.576836	1.67584	1.46749	1.84153	1.48471	0.296027	0.226695	-0.123088	-0.348603	-0.63919	-1.67677	-0.633454	-1.07237	-0.389333	-1.28259	-1.43024	-1.62947	0.577752	-0.861019	0.838785	0.679764	0.741703	0.74427	0.196996	0.138277	0.133485
1781	H300016448	H300016448	-0.510056	0.121878	-0.121328	-2.24626	-2.26382	-2.66049	-0.734484	-0.546675	-0.272939	0.752205	0.75743	0.869338	0.680185	1.2468	0.86872	-0.0366752	-0.203465	-0.107066	0.58857	-0.0373325	0.211008	0.605472	0.21154	0.635499	0.781452	0.790067	0.62043
11741	C12orf35	H300002541	1.29013	0.182419	1.65133	1.76084	0.402245	1.19678	0.35874	0.684443	-0.575096	-0.0343647	0.00150579	-1.01991	0.563256	0.9322	0.95476	-0.178406	0.517957	0.0555386	-0.62695	-0.179995	-1.72177	-1.43311	-1.6672	-1.93686	-0.466444	-0.176254	-0.535787
1317	H300009213	H300009213	-1.33069	0.490644	-0.80272	-2.24321	-0.914492	-1.72738	-0.21466	-2.00468	-0.149365	1.11572	0.289365	-0.889699	-0.375829	1.23645	-0.104675	0.557114	-0.177544	0.641465	1.32183	0.514396	0.718028	0.625056	1.15901	1.00844	0.527131	0.247918	0.482378
13712	CDK2AP2	H300004591	-0.543517	-0.516607	-0.86799	-2.25746	-2.35317	-1.19381	-0.294106	-0.594683	-0.439886	-0.409415	1.49635	2.19228	0.224314	-0.00982219	-0.178369	0.964815	0.770286	1.03936	0.616555	-0.0683266	-0.464778	0.693633	0.448034	0.254049	0.469022	0.482224	0.541022
3621	opHsV0400006639	opHsV0400006639	-0.707375	1.14055	-0.345722	-0.018988	-0.280529	0.00209745	-0.270185	-0.471025	-0.100139	1.06998	0.794363	1.00593	1.31814	2.24001	1.0511	0.781284	0.0640232	0.149727	0.987054	0.085923	-1.11029	-1.85327	-1.46032	-1.613	-0.735298	-0.877866	-0.846176
22489	MRPS21	H300021251	0.836878	0.915486	-0.157023	2.88761	2.00334	2.25125	0.245987	0.0879312	0.166229	-0.125079	-0.547118	-0.797036	-0.395796	0.0347074	-0.154593	-0.856446	-0.783922	-0.878782	-0.486385	0.287956	-0.42215	-0.813636	-0.616787	-1.0364	-0.585525	-0.257178	-0.803525
32542	TDRD6	opHsV0400001047	0.441315	-0.385802	1.74418	0.361995	-0.0523759	-0.893963	-0.325662	1.03763	-0.385761	-0.991286	-0.638519	-1.48124	-0.930189	-0.91638	-0.529931	-1.59435	-1.02986	-0.547834	-0.38535	0.190207	0.0768388	1.07398	1.41085	1.59391	0.0825406	1.17221	1.90284
25924	PDLIM7	H300014199	-1.26753	-0.503155	0.378481	1.51005	1.15219	1.18337	0.365805	0.472137	0.372497	-1.72715	-1.15099	-1.02785	-1.12824	-1.51553	-0.636434	-0.597883	-0.840938	-0.551887	2.54955	0.505086	0.653748	0.217493	0.388942	0.44973	0.157375	0.327139	0.263993
29002	R3HDM1	H200016624	2.60505	-0.438593	1.09598	1.34712	0.579376	-0.161129	1.053	0.752777	0.972312	-0.343832	0.238308	-1.33843	0.132936	1.02177	-0.159245	-0.132509	0.526266	0.431917	-0.353762	-1.37434	-0.753199	-1.32078	-0.248352	-0.312874	-1.44184	-1.40916	-0.968753
15795	DRG1	opHsV0400002215	0.785811	-0.311736	-0.512873	1.75563	2.86333	1.65971	0.484815	0.814856	0.449232	0.379229	-0.243089	-0.158352	0.516178	0.320105	0.238236	-0.575412	-0.276537	-0.175331	-1.87713	-0.928584	-1.24691	-0.860302	-0.543497	-0.934943	-0.445831	-0.425998	-0.750604
10219	AMIGO3	H300003012	0.0651578	0.84133	-0.116124	-1.93843	-1.97656	-2.58458	-0.858333	-1.6663	-0.975845	0.364621	0.478564	1.12374	0.327595	-0.0645153	0.602222	0.613441	1.07634	0.72583	0.372321	0.363662	-0.0319611	0.410877	0.746158	0.1806	0.67564	0.475745	0.768801
22568	MT1X	opHsV0400000170	-0.190201	-0.070005	0.641446	0.871002	1.25722	1.00728	-0.0227745	-0.468651	0.184968	0.456485	0.0786313	-0.0119581	0.776275	0.495245	0.490586	1.38298	1.17803	1.05234	-0.663767	1.03671	-1.86841	-1.53118	-1.81911	-1.83676	-0.536089	-0.699642	-1.19066
34449	VTI1B	H300009660	-0.284689	0.745508	0.797509	2.29734	2.1737	1.86852	0.575561	0.231228	0.70635	-1.02281	-1.14616	-1.26019	0.262155	-0.856991	0.143083	-0.581301	-0.56277	-0.867222	-0.0485858	0.769149	-0.792863	-1.09513	-0.845588	-0.990742	0.0763212	-0.0989011	-0.192481
6368	opHsV0400010390	opHsV0400010390	-1.91718	-0.738043	-0.241773	-2.02586	-2.04683	-1.01565	-0.468016	-0.745276	-0.0331213	1.06492	0.141115	1.98422	0.0884684	1.0561	0.0114711	0.275634	-0.231151	-0.133701	1.63582	-0.102275	0.884603	0.0140941	0.945259	0.355162	0.0399301	0.752684	0.449384
21595	LYN	H200006801	-1.11691	0.356355	2.22396	1.42643	1.33479	1.64909	-0.226511	-0.071593	0.541246	-0.879219	-1.14992	-1.13837	-1.50824	-1.84522	-1.16077	-0.33363	-0.321633	-0.721532	0.689426	0.850194	0.328112	-0.0447772	0.110647	0.127854	0.416378	0.340034	0.123802
19378	IGFALS	H300001286	-1.29289	0.234442	-0.466407	-1.54386	-1.73734	-1.51493	-0.681061	-0.393035	-0.544237	1.66353	1.23802	2.28902	0.684882	1.84963	1.02616	-0.0424348	-0.395632	-0.245799	0.600221	-0.574158	0.0149704	0.0917401	-0.0930185	0.0519814	-0.044676	0.0011711	-0.176284
1083	H300006364	H300006364	0.689756	2.39286	-0.385968	1.53112	0.179799	1.85056	0.839097	0.772919	-0.00729584	-0.78833	-0.895501	-0.874846	-1.46261	-1.54453	-1.41924	-0.536205	-0.436755	-0.180286	1.39043	-0.266214	-0.2934	-0.957722	0.308591	-0.267243	-0.0608012	0.0670463	0.354771
25502	P4HA1	H300017296	1.19639	0.551844	-1.73659	0.930521	1.28012	0.957451	0.41418	0.514	0.331831	0.569202	0.45022	-0.422898	0.35531	0.888439	0.538903	0.582074	0.897951	0.941365	-1.25521	0.74394	-1.66633	-1.29139	-1.37364	-1.16407	-1.18254	-1.12873	-0.922338
21122	LOC197350	H200018386	-0.335102	0.469543	0.0121693	-2.7013	-2.02796	-1.79452	-0.258518	-0.594198	-0.0199017	0.916696	1.13656	2.14353	1.0326	0.975148	0.613103	0.504972	0.439868	0.827876	0.010523	0.0284028	-0.372646	-0.297908	-0.230833	-0.197248	-0.0494512	-0.0346803	-0.196714
34223	USP28	H200013369	1.2177	0.291983	0.578453	0.587982	1.57648	2.71787	0.761702	1.15369	-0.0818872	-0.452491	-0.998713	-1.70566	0.0313856	-0.649672	-0.0650753	-1.19119	-1.07205	-0.737119	0.149428	1.42791	-0.275541	-0.614412	-0.66073	-0.8842	-0.665845	-0.0819245	-0.358063
26478	PMAIP1	opHsV0400006399	0.930893	0.873104	-0.382305	-1.18314	-1.59606	-1.11556	-0.853326	-1.27783	-0.792196	0.700085	0.655179	1.10365	1.58181	1.81581	0.662875	0.213587	2.23476	0.23064	-0.404809	-0.0313367	-0.49682	0.125682	-0.514903	-0.133472	-0.680555	-0.918405	-0.747353
3784	opHsV0400007115	opHsV0400007115	-0.508681	0.509274	0.461127	2.21851	1.93893	2.73694	0.685744	0.41137	0.766361	-0.277341	-0.962666	-0.685709	0.20202	-0.911223	-0.39528	-0.502563	-0.662619	-1.00068	0.202212	-0.244144	-1.2673	-0.874458	-0.629381	-0.794973	-0.0284452	0.031354	-0.418383
32208	SYNJ2	H300019028	0.287174	-2.32305	-0.15883	-2.16549	-2.30453	-1.40499	0.0861237	-0.877158	-0.185964	0.722032	0.0804614	1.05957	0.975324	1.33452	0.956948	0.211273	0.464395	0.366423	-0.164623	0.628682	0.957898	0.186485	-0.12471	0.0877289	0.611914	0.396382	0.29602
33855	TXNDC5	H300002873	0.55057	0.625206	1.4956	1.43708	1.61026	1.4325	0.553784	0.404194	0.396414	-0.96039	-1.60684	-2.16226	0.00261901	-0.137912	-0.483186	-0.714224	-0.428695	-0.898594	-0.843027	1.39602	0.260341	-0.0173936	0.00690033	-0.141709	0.175933	-0.230915	-1.72227
14854	CTR9	H200008128	1.1386	0.234766	-0.310672	2.57951	1.83221	2.16876	0.422649	0.743555	0.38276	-0.281518	-0.440814	-1.501	-0.0857581	-0.244399	-0.205947	-0.372628	0.327135	-0.938856	-0.292861	0.0232682	-0.135344	-0.654278	-1.18633	-1.38784	-0.529833	-0.308282	-0.976849
34624	WFDC2	H300017584	-0.211422	-0.97414	-1.00317	-0.642095	-1.10754	-0.99225	-0.227266	0.0733345	-0.210434	1.42553	1.33436	1.5071	0.622648	1.41081	1.96141	0.399386	0.494309	0.0548392	-1.28697	-0.693404	-1.13693	0.738269	0.329664	0.38271	-0.0968404	-0.07483	-2.07708
20990	LILRA1	H300019201	-0.72339	-0.55371	1.87318	0.57962	0.905486	0.887891	0.386769	0.203031	0.157666	-0.63333	-1.40663	-1.12914	-0.576889	-0.146653	0.150009	-1.68399	-1.75164	-2.01086	0.0618262	-0.0120897	1.24486	0.57604	1.39038	1.12312	0.529948	0.331596	0.226894
24001	NP_073574.1	H200001317	-0.210113	-1.29816	-0.00863076	-2.89556	-1.60092	-1.37483	-0.268522	-0.439096	-0.325158	0.0598841	-0.143057	0.111194	-0.292115	0.708757	0.721537	-0.116124	-0.462403	0.313746	2.10948	0.21198	1.49261	0.161942	0.500039	0.60338	0.532716	0.702607	1.20482
26965	PRKCSH	H200000373	-1.16298	0.608605	-2.15234	-1.16522	-0.567916	-0.596965	-0.977969	-0.933458	-0.327296	-0.245295	1.49857	1.64051	0.629079	0.455296	0.375603	1.23645	1.34609	1.64464	0.456091	-1.40774	-1.16897	0.140345	-0.19411	0.402365	0.298388	0.0232409	0.144984
22432	MRPL21	opHsV0400005805	2.76037	0.725947	0.949301	1.20218	1.19641	0.901589	0.95991	-0.216023	0.0876564	-0.0163037	-0.486855	-0.977086	0.499483	0.351981	0.262632	-0.123629	-0.427609	-0.351125	0.0654864	-0.338258	0.466249	-1.1037	-0.803726	-1.19003	-1.2315	-1.26962	-1.89373
25691	PCBP4	H300018582	-0.520465	0.162216	-0.412908	-2.35837	-1.79449	-2.30739	-0.108082	-0.207474	-0.218059	0.927687	1.48247	1.56152	1.41235	1.38143	0.515857	0.44507	-0.00843041	0.514704	0.885892	-0.324442	-0.321389	0.0227456	-0.253984	-0.310185	0.0428218	-0.01346	-0.195636
21110	LOC131055	H300005668	0.230737	-0.0279032	1.00056	2.45735	2.2948	2.35592	0.00290073	-0.00691458	0.110387	0.191567	-0.224949	-0.395756	0.216941	-0.320632	0.0627175	-0.237494	-0.246674	0.0635369	-0.716679	0.0917228	-1.33632	-1.03417	-0.964547	-1.04965	-0.687498	-0.882846	-0.947115
34068	UGP2	H300021244	1.11203	0.25736	0.325425	2.18815	1.98396	2.16303	0.350943	0.350657	0.512252	-0.667983	-1.0427	-1.59305	0.153138	-0.965399	-0.400313	0.186773	0.202899	-0.22732	-0.798511	0.665966	-1.22562	-0.803159	-0.427195	-0.582639	-0.722379	0.0481053	-1.04443
20526	KLHL5	opHsV0400006839	0.757745	0.210937	0.679925	-0.00785694	2.47249	1.11909	0.589892	1.14337	1.08147	-0.787657	-1.65901	-1.77349	-0.589552	-0.840092	-0.650904	-0.699837	-0.53787	-0.434386	-0.31253	2.00206	-0.707771	-0.692874	-0.327481	-0.64623	0.255834	0.064136	0.290595
6466	opHsV0400010499	opHsV0400010499	-0.688079	-1.17424	-0.582941	-3.14618	-0.817717	-0.796676	-0.215976	-0.0544967	-0.0816858	1.39225	1.63587	1.35042	1.19396	1.55037	-0.0377087	0.598079	0.0644427	0.648953	-0.82934	-0.738201	-0.0086768	0.294365	-0.0102183	0.407105	0.0738397	0.0454122	-0.0729345
1080	H300006351	H300006351	-0.670018	1.41404	-0.267537	0.431279	-0.235125	-0.590088	-0.248375	-0.551161	0.124189	1.34513	1.76922	1.69357	1.24509	1.31778	0.758029	0.343249	-0.0795438	-0.10164	-0.132892	-0.00214172	-2.2324	-0.321948	-1.56495	-1.03174	-0.809696	-0.528951	-1.07338
26980	PRKX	opHsV0400000309	0.368713	-0.345253	2.41897	1.33151	1.6055	2.0815	0.0748542	-0.0876307	0.216772	-1.0217	-1.08389	-1.14413	-0.925213	-0.376654	0.163549	-1.14043	-1.27066	-1.51812	-0.127097	1.00943	0.417957	-0.185216	-0.182233	0.130112	-0.100026	-0.267851	-0.042763
7573	opHsV0400011736	opHsV0400011736	0.588123	-0.991347	0.113506	-0.840211	-1.11776	-2.754	-1.42292	-0.1935	-0.610453	0.969617	0.299876	0.51275	0.73791	0.378439	1.064	1.57425	1.75511	1.32204	0.297101	-0.348156	0.00121335	-0.89763	-0.395219	0.583137	-0.170356	-0.784663	0.329146
20869	LCOR	H200012520	1.45214	-0.69012	1.89862	1.47614	0.721536	2.0807	0.437018	0.702204	0.416109	-0.385427	-0.120323	-0.880078	-0.132123	-1.89823	-0.0137563	-1.57456	-0.920391	-1.49619	-0.605566	-0.398293	0.132847	0.297376	-0.244216	0.742874	-0.635663	0.0284323	-0.39106
3720	opHsV0400007013	opHsV0400007013	-0.654784	0.16967	-1.50283	-2.60771	-1.52757	-2.5221	0.0838794	-0.494555	-0.0885953	0.407088	0.561834	0.797877	-0.0152064	0.486984	0.215188	0.32963	-0.160695	0.736506	1.41286	1.02141	0.841582	-0.121926	0.211905	0.258644	0.620588	0.8227	0.717615
32130	SUPT7L	H300018996	-0.223976	0.502585	0.325646	1.84167	2.07093	2.23304	0.647341	0.679624	0.265802	-0.807812	-0.486549	-1.50913	-0.558444	-1.46566	-0.179098	-1.01939	-0.942206	-0.665658	-1.49452	0.129661	0.0749157	-0.640877	-0.208403	-0.347165	0.740397	0.402597	0.634677
17672	GDF1	H300004624	-0.600351	-1.25148	-1.15045	-0.823237	-1.23809	-1.9885	-0.35564	0.064312	0.779125	1.67746	0.416482	1.32913	0.288867	0.491386	1.5882	1.20897	0.885247	1.04245	-1.57657	0.426989	-1.3122	-0.137712	-0.518306	0.131362	0.451472	0.0610957	0.11001
3404	opHsV0400005635	opHsV0400005635	-0.0194317	0.776062	1.62612	1.18942	2.10808	2.30484	-0.210383	0.207904	-0.137072	0.32273	-0.259264	-0.145422	0.0373681	0.74408	0.767873	-0.457168	-0.325836	-0.360303	-0.256967	-1.24515	-1.7903	-1.56331	-0.530309	-0.699724	-0.918283	-0.323168	-0.842375
1283	H300008922	H300008922	0.0850761	0.429591	0.690115	2.35223	2.38163	2.61431	-0.0463002	0.423502	0.280218	-0.448956	-0.578356	-0.603581	-0.241234	-0.24755	-0.270468	-0.654124	-0.358456	-0.443029	-0.0130589	-0.760604	-1.39787	-1.03827	-0.766533	-0.903388	-0.229901	0.0807972	-0.335793
27274	PTGFRN	H200009907	0.963936	0.0166706	-0.558345	1.27784	-0.198198	-0.336085	1.56132	1.09954	1.40204	-0.908351	-0.769156	-1.04579	-1.18538	-2.21174	-1.46283	-0.645241	-0.663297	-0.332826	0.630859	2.01521	0.0134467	0.400601	0.335564	0.500915	-0.454433	0.504854	0.0488873
24587	NR0B1	H200016637	0.617104	-0.181958	1.66728	2.13224	2.03688	2.345	-0.11813	-0.183052	-0.196806	-1.1432	-0.96042	-0.701194	-0.872353	-1.17788	-1.11051	-0.848686	-0.618179	-0.469858	-0.341774	0.706145	0.256912	-0.368589	-0.345932	-0.073585	-0.219137	0.302896	-0.133206
28282	Q8N9W7_HUMAN	H300012229	-0.88458	-0.054115	-0.456419	-0.660182	-0.665286	-0.0140347	-0.62443	-0.800022	-0.729507	1.26944	1.95954	1.95932	1.86994	2.17387	0.920585	-0.210275	-0.295399	-0.399516	-0.041446	-1.49356	-0.497056	0.0210448	-0.272684	-0.158276	-0.872395	-0.403253	-0.64131
30154	SALL1	H300006826	-1.38472	1.73261	0.11622	-0.4363	-0.180531	0.155855	-0.625179	0.0413982	0.308813	0.72774	1.61315	0.985646	0.946672	1.04523	0.682471	0.927922	0.670455	0.546928	-0.146895	0.940394	-1.28628	-1.25571	-1.64168	-1.4439	-0.881487	-0.81487	-1.34396
25485	P2RX7	H200014568	-0.576051	-0.633339	1.51764	0.0406729	0.10483	0.191909	-1.13494	-1.09378	-0.570372	-0.924308	-0.829176	-0.690748	-1.85751	-0.37568	-1.54399	-0.121128	-0.27212	-0.103007	1.03094	2.31774	1.40418	1.16505	0.725462	1.12849	0.303499	0.259036	0.536701
31100	SLC35B4	H300012966	0.706938	0.455311	0.837787	2.54229	1.82456	1.79064	0.472816	0.626366	-0.0822555	-0.412003	-0.762776	-1.5278	-0.302965	0.533251	0.225104	-1.278	-0.943863	-1.16813	-0.0723868	0.56286	0.00928178	-0.899017	-0.897588	-0.936631	-0.562414	-0.084306	-0.657076
20495	KLHL12	H200000840	0.497325	-0.225755	0.504649	2.72017	2.07146	1.97021	0.282013	0.514515	0.520905	-1.37667	-1.29369	-1.6429	-0.276266	-0.456659	-0.412901	-0.508524	-0.47657	-0.312427	-0.696917	-0.573097	-0.925394	-0.0749698	-0.225197	-0.243144	0.0950544	0.341004	0.203769
31143	SLC39A10	H200005934	1.48769	0.1499	-0.090759	1.1121	1.22184	2.00078	0.947634	0.725368	0.667057	0.309949	0.0686006	-0.0478677	0.067222	-0.415772	0.319983	-0.766278	-0.198256	0.232568	-1.35156	-0.504638	-0.866441	-2.08008	-1.67465	-1.74117	-0.33539	-0.207512	0.969691
7823	opHsV0400012008	opHsV0400012008	-0.612147	-0.0448741	0.231976	-1.49664	-2.22993	-2.43206	-0.877734	-0.913011	-0.770097	0.407906	0.366302	0.726889	0.384824	1.4032	0.204495	1.08715	0.299476	0.928452	1.61825	-0.727095	-0.0703925	0.515843	0.739429	1.06941	0.0391789	0.0464897	0.104725
18426	HAAO	H200011573	-0.00745622	0.580925	-0.215002	-2.86338	-2.40231	-1.85769	-0.380756	-0.76246	-0.870508	-0.18807	0.161477	0.374589	0.128322	0.259938	0.30672	0.19603	0.306241	0.304664	0.586992	0.0864024	1.09639	0.960311	0.682501	1.00921	0.98135	0.665601	0.85996
24621	NRBF2	H300002547	0.304257	0.80447	0.683616	1.79419	2.13353	1.76004	0.380202	0.210997	0.48683	-1.30753	-1.64888	-1.43985	-0.856401	-0.698197	-0.866472	-0.150768	-0.180353	-0.183626	-1.47626	1.26702	0.201759	-0.632324	-0.645873	-0.252651	0.439832	-0.182056	0.0544952
24883	OAF	opHsV0400001720	-1.26005	0.0309723	-0.32716	-1.08484	-0.844754	-1.48462	-0.965966	-0.910801	-0.240955	1.17648	1.46785	1.86581	1.63633	2.43451	0.869895	-0.0692894	-0.383193	-0.299597	0.75852	-0.406297	-0.606059	0.200115	-0.262699	-0.275879	-0.456223	-0.0492102	-0.512891
10793	ASAH3	H300009542	0.194488	-0.49003	0.627675	1.17742	0.485312	0.802419	1.83284	2.98245	1.58997	0.0966059	-0.38913	-1.11362	-0.792609	-0.223469	-0.491204	-0.544217	-0.667485	0.384646	-1.01246	-0.158197	-1.66954	-0.287606	-0.430239	-0.304329	-0.549982	-0.42805	-0.621652
25836	PDCD6IP	opHsV0400007343	0.392066	-0.0765191	0.504167	2.29981	2.70098	2.14136	0.186262	0.421822	0.680225	-0.997953	-0.837997	-0.733122	-0.556881	-0.789259	-0.427038	0.0533024	-0.221515	0.189929	-0.791945	0.224259	-1.37285	-0.901263	-0.431363	-0.493486	-0.211485	-0.493939	-0.45756
16728	FAM38A	opHsV0400001419	-1.65326	0.049453	-1.72222	-0.283685	0.00373713	-0.74615	-0.667665	-0.608286	-1.34279	0.984274	1.31047	1.59358	1.36601	1.4156	0.146565	0.67265	0.346727	0.924733	1.09161	-1.657	-0.873859	0.607803	-0.120006	0.683682	-0.401878	-0.839686	-0.280395
9740	ACTL7A	H300005527	-0.415442	-0.40612	-0.508791	-1.43929	-2.01101	-2.07276	-0.869404	-0.88596	-0.426452	0.437715	0.422094	0.677755	0.62743	1.04222	1.71929	0.238988	0.341575	0.758412	0.491914	0.225048	0.612447	2.41405	-0.596053	-0.619545	0.105887	0.0681619	0.0678376
16016	EEF1A2	H200000653	-0.446727	-0.0314355	0.244819	0.125679	-0.191438	-0.0181496	0.0483856	-0.662967	1.05912	1.38346	0.953057	1.81699	0.914382	0.776147	0.38236	0.646402	0.407502	0.672914	-1.74577	-1.09422	-2.30737	-1.16845	-0.895573	-1.64268	0.411904	-0.41423	0.775911
34907	ZC3H7A	H300019027	2.13432	-0.208641	0.216909	2.62589	1.35024	1.2458	0.587362	1.01873	0.286333	-0.604598	-0.600032	-0.984939	-0.187236	0.483087	0.606234	-1.45499	-1.11558	-0.937963	-1.19477	-0.310334	-0.162132	-0.25952	-0.538149	-0.744443	-0.557391	-0.218585	-0.475605
33737	TTC7A	H300019843	-0.46162	0.0528477	0.211552	-2.61928	-1.31207	-3.0164	-0.710165	-0.879701	-0.30701	0.224589	0.882048	0.952821	0.998809	1.3879	0.513365	0.474018	0.246592	0.57049	0.161564	0.209597	0.254882	0.370353	0.0167679	0.274113	0.636852	0.53912	0.327961
16686	FAM13A1	H300006579	-0.974769	0.0378757	-0.226821	-2.28778	-0.923474	-1.93345	-1.23894	-0.820059	-0.592802	1.22702	1.00982	1.505	1.07336	1.69098	0.768559	-0.0645527	-0.297453	-0.409106	-0.474139	0.166492	-0.409984	0.615976	1.1078	0.565926	-0.141378	0.695683	0.330215
31851	SSFA2	H200021097	1.42146	-0.203707	0.38092	2.32571	2.41888	2.05536	-0.0743924	0.786427	0.134006	-0.913693	-0.687863	-0.691049	0.0416069	0.444642	-0.194177	-0.770492	-0.653296	-0.738349	0.0780942	0.122006	-0.927393	-0.660163	-0.614692	-0.683149	-0.792349	-0.770792	-0.833564
10647	ARHGEF1	H300014268	-1.2633	0.0887092	-0.570389	-2.0812	-1.85134	-1.52848	-0.37088	-0.636585	-0.247692	0.754366	1.54054	2.17397	1.07729	1.71175	0.731355	-0.0225692	-0.3242	-0.15362	0.80762	-0.0209509	-0.0537972	-0.248229	-0.0760058	-0.0686321	0.312632	-0.0297723	0.349403
23918	NP_060404.3	H300011464	1.86921	1.96943	1.31768	0.892032	0.948554	0.67966	0.273564	0.431833	0.509184	-1.07085	-0.468207	-1.35969	-0.336357	0.372729	-0.398497	-1.52386	-0.925243	-0.977304	0.441654	-2.38744	0.474823	-0.18494	-0.235481	-0.427429	0.0916432	-0.150848	0.174149
24630	NRG1	H300020640	-0.251701	0.00827868	-0.700319	-1.56066	-1.62574	-1.67825	-0.184388	-0.114777	-0.433573	-0.356275	-0.143028	-0.127671	-0.78816	0.71254	-0.063465	-0.574614	-0.778771	-0.287011	1.16325	0.0861057	1.65827	0.707184	2.49597	1.87272	-0.154384	0.518402	0.600065
32400	TBCA	opHsV0400004468	1.10906	0.421601	0.160473	2.30046	1.96808	1.95501	0.148554	0.305007	-0.306867	-0.294686	0.12521	-0.239472	0.904292	0.868085	0.488275	-0.464365	-0.53605	-0.93467	-0.454106	-0.471032	-0.560434	-1.23891	-1.07656	-1.26618	-0.987272	-0.679239	-1.24427
5998	opHsV0400009922	opHsV0400009922	0.391991	-0.517144	0.849102	-0.439315	-0.173095	0.541975	0.526265	0.191819	0.353002	-1.158	-0.767778	-1.54656	-0.873482	-1.65867	-0.369194	-0.181051	-2.07445	-0.112918	2.97364	1.07441	0.890884	0.268178	0.561012	0.214599	0.339042	0.369999	0.325739
28143	Q8N4J7_HUMAN	H300004128	0.0471985	0.242463	0.137955	-1.64589	-0.938412	-1.14096	0.0886776	-0.507093	0.0929213	-0.750584	-1.36108	-1.13321	-0.309226	0.231367	-0.172202	-0.576365	-0.306793	-1.19122	2.88692	-0.0232575	0.812465	0.470799	1.36149	0.869426	1.14952	1.33102	0.334063
28771	Q9H8N1_HUMAN	opHsV0400001296	-0.242149	1.69818	0.396759	-1.14216	-1.18104	-1.61374	-1.07837	-0.57214	-0.523307	1.18964	1.49827	1.48049	1.08179	1.284	0.89161	0.859081	0.399019	0.567337	0.0981038	-0.91816	-0.0872042	-0.445177	-1.52535	-1.10164	0.0250281	-0.585379	-0.453472
25710	PCDH21	opHsV0400002515	-0.281378	-0.700861	-0.493752	-1.69688	-2.90549	-1.70166	-0.458793	0.127167	-0.460191	-0.140489	-0.761701	-0.255245	0.340238	0.934555	-0.0236589	0.473965	0.096274	0.585667	0.45783	1.27543	0.388723	1.16018	0.775766	1.55276	0.681598	-0.176939	1.20688
20708	KRTAP5-5	opHsV0400005357	-1.01339	0.382699	-0.371488	-1.47878	-1.34799	-1.55731	-0.75738	-0.76838	-0.384888	1.65274	1.37235	2.17139	0.861029	2.1071	0.583598	0.0105481	-0.239785	0.0685987	0.917759	-0.127368	-0.77479	0.245575	-0.266306	-0.389737	-0.172319	-0.362637	-0.360835
28851	Q9NYI9_HUMAN	H200016908	-1.2077	-0.625296	-2.21229	-2.48614	-0.881366	0.0125517	-0.481858	-1.06333	-0.283124	1.12621	0.515959	0.674109	0.321972	0.139075	0.429295	1.02086	0.892734	0.171962	-0.725639	-0.251445	0.601843	1.30755	1.69825	0.615027	-0.406027	0.546444	0.550374
31098	SLC35B3	H200008853	0.0754625	-0.19421	-0.831333	1.88319	1.86003	1.70648	0.261982	0.259887	0.99768	-1.5996	-1.35291	-1.72232	-1.24133	-1.08459	-1.05161	-0.626468	-0.372383	-0.0545666	1.0004	-0.531974	0.434831	0.348112	0.56002	0.5608	0.29587	-0.0206592	0.439203
30789	SIRT3	H300013989	0.125923	-2.24296	-1.61124	-0.184098	-0.591191	-0.0147263	-1.18991	-0.950627	-2.5935	0.0130438	0.222304	0.564977	2.01809	0.0366728	0.447297	0.0924022	0.539627	0.323984	0.211181	0.851233	1.17201	0.509534	0.382192	0.384821	0.866503	-0.040183	0.65663
19463	IKBKB	H200015359	-1.25643	-0.74463	0.794755	-0.541591	-0.0144113	0.813306	0.0811224	0.964846	0.669312	-2.01245	-0.311584	-0.591791	-2.13669	-1.61873	-1.02724	-0.42648	-0.0464114	-0.205469	0.956149	0.806282	0.0910844	1.05442	1.36841	1.24032	0.920339	0.973636	0.199913
34092	UHMK1	opHsV0400011090	2.17927	0.895551	1.34208	1.30169	1.48117	1.71408	0.162473	-0.301668	0.345562	0.111644	0.292234	-1.07268	0.138371	0.234656	-0.000351778	-1.19735	-0.960788	-0.705392	-0.31338	0.78709	-0.48215	-1.28069	-1.19364	-0.822155	-0.905674	-1.30211	-0.447853
4434	opHsV0400007971	opHsV0400007971	-2.06692	-1.00494	-1.90278	-0.439487	-0.350689	-1.27284	-0.0455521	0.26132	-0.39208	0.846263	1.47872	1.48697	0.642993	1.53257	0.881192	1.00501	0.617348	0.147502	0.350017	-1.88561	0.829124	0.246155	0.139752	-0.0785883	-0.43407	-0.127625	-0.463746
5935	opHsV0400009855	opHsV0400009855	-1.22087	0.677796	0.0304332	-0.474115	0.249977	-0.404388	0.257802	0.323385	0.149172	1.59278	1.65701	1.77377	1.06183	1.0992	0.129846	0.540554	-0.00394578	0.368218	-0.999383	-0.096724	-1.14417	-1.19301	-2.64677	-1.10275	-0.0586447	-0.0969405	-0.470063
30755	SIGLEC10	opHsV0400004278	-1.27486	-0.246579	0.461106	0.809114	0.938871	0.803189	-0.161334	0.671778	-0.563604	-1.66261	-1.40923	0.19425	-0.257649	-1.34242	-0.165889	-1.34198	-0.674107	-1.98499	2.1664	0.682924	0.928984	0.420184	0.63097	0.867808	0.636285	0.670056	0.203335
30457	SEPN1	H300020815	0.356764	0.214609	0.914005	0.349147	0.223063	0.0599623	0.0601611	-0.0804661	-0.00812788	-1.60418	-1.47585	-0.786082	-1.71778	-1.87773	-1.54799	-0.104132	0.248414	0.00435393	-1.24753	0.836285	1.15994	1.07463	0.676876	1.38994	1.28795	0.34084	1.25292
31477	SNRPD2	H300000812	1.0703	2.11112	-0.379918	0.97263	2.43948	0.151215	0.765316	0.426516	0.368579	0.544822	-0.288819	-0.135818	0.61662	0.506919	-0.131097	-0.111531	-0.00745382	-0.801345	0.0135453	-0.228741	-0.698755	-1.46087	-1.29118	-1.86419	-0.716093	-0.369338	-1.5019
12635	C6orf1	H300009519	-0.531302	-1.17464	-0.473266	-2.07353	-1.97855	-0.150982	-0.37436	-0.905705	-1.23883	0.329681	0.934728	0.735402	0.520912	-0.0488519	0.243192	-0.529217	0.230014	-0.193043	-1.12782	0.690058	0.665528	1.49089	1.13916	1.15038	1.25064	-0.170304	1.58981
29003	R3HDM2	opHsV0400003012	1.52698	0.592676	-0.0257726	1.88713	1.47719	1.57601	0.365316	0.365352	0.53022	-1.25421	-1.53187	-1.43114	0.00713614	0.604919	0.289441	-1.39395	-1.29217	-1.72308	-0.814933	0.171841	-0.374797	-0.354477	-0.210322	0.246643	-0.0366247	0.678398	0.124091
19149	HSD3B7	H300017265	-0.0476031	-2.3401	0.801191	-2.33292	-1.54673	-1.07071	-0.563043	-0.591367	-1.47748	0.287248	0.454693	0.307288	0.424942	-0.147655	-0.0634552	0.567979	0.853907	0.734262	0.592875	1.93473	0.579711	0.405953	0.656532	0.659419	0.056502	0.309289	0.554544
6286	opHsV0400010251	opHsV0400010251	-0.700313	-1.68364	0.394892	-2.14453	-1.78662	-1.55254	-0.721908	-0.579502	-0.366055	0.245689	-0.164629	1.06245	0.73222	1.09395	1.36268	-0.337663	-0.237275	-0.510764	0.765599	-0.275865	0.373263	0.617417	1.41629	1.24876	0.150141	0.653991	0.943963
10338	ANKRD25	opHsV0400004813	0.215176	-0.0489682	-0.86059	-2.22708	-1.75904	-2.79622	-0.460777	0.0125008	-0.667849	0.599299	1.62697	0.985822	1.10751	0.347129	1.10055	0.633905	0.786598	0.114082	-0.0485663	-0.033625	-0.252056	0.122482	-0.14684	-0.0573164	0.504003	0.489709	0.713184
5626	opHsV0400009520	opHsV0400009520	-1.5039	-1.32676	-0.654471	-0.0839158	-0.731684	-1.60271	0.0426803	0.0340622	-0.678727	1.6324	-0.522767	2.21291	1.12693	1.54028	1.61988	0.0984608	0.0213525	1.23924	0.36077	-0.339975	-1.09759	0.304159	-0.123269	-0.679413	-0.360575	-0.12437	-0.403003
10962	ATP2A3	H300018803	-0.421858	-1.52287	1.00966	-0.781464	-0.188689	-0.025923	-0.46873	-0.325932	-0.453155	-2.07151	-1.19366	-0.353476	-1.18599	-1.04962	-0.993953	-0.0459052	0.305044	0.63924	1.65556	0.0586303	0.671276	1.05965	0.829309	1.2061	1.59133	0.606403	1.45053
34549	WDR42B	H300008626	-0.412345	-0.971958	-0.617785	-0.772266	-1.33601	0.424562	-1.09844	-1.37033	-0.384131	2.05061	0.834644	1.87599	0.870948	1.0434	1.09695	0.667246	0.995734	-0.47797	-2.20175	-0.0436047	0.22187	0.140843	-0.219775	0.0947968	0.4395	-0.571076	-0.279653
17314	FOXP3	H200015882	-0.10995	0.177661	-0.570066	-0.225961	-1.63613	-2.74177	-0.611252	-0.86999	-0.534673	0.706717	1.74493	0.790227	1.05527	0.386949	0.484551	1.11032	1.95648	0.4619	0.415373	0.11315	-1.06235	0.504297	-0.774616	0.21583	-0.331926	0.1672	-0.822175
2014	opHsV0400000333	opHsV0400000333	-0.0194225	0.430096	-0.778632	-0.607247	-0.724293	-1.27855	-0.678524	-0.391584	-1.1721	0.814222	3.41306	0.857726	1.21332	1.30811	1.40002	0.118664	-0.312102	0.429424	-0.133685	-0.663456	-0.819897	-0.116276	-0.478741	-0.388179	-0.409677	-0.538071	-0.474215
7428	opHsV0400011580	opHsV0400011580	-0.0634849	0.753306	-0.24208	-0.759798	-0.958407	-2.07776	-0.730708	-0.155838	-1.09052	1.48386	1.80649	1.61418	0.975387	1.80631	1.41258	0.0586186	0.0485641	0.0262234	-0.812804	-1.19731	0.00851481	0.169616	-0.483929	-0.737313	-0.0814679	-0.784237	0.0119947
33680	TSPYL2	opHsV0400006413	-0.117633	0.115609	-0.12714	-1.68025	-1.80405	-1.86582	-0.606063	-0.821676	-0.571583	-0.469461	-0.248828	-0.357483	0.243139	0.174714	0.0649327	0.34009	-0.209203	-0.540139	3.05957	0.61155	1.37647	0.910843	0.966438	0.478719	0.186593	0.347217	0.543448
21898	MBD3L2	H300005684	-0.770053	0.58495	-1.17233	-1.90795	-1.55403	-1.41721	-0.285438	-0.340672	-0.0139095	0.791014	0.23562	0.772667	2.24091	1.6111	0.742232	0.557138	1.05241	0.817133	0.852191	0.278855	-1.46253	-0.00768536	-0.2635	-0.161865	0.0896095	-0.785029	-0.483635
21540	LSM6	H200004576	0.988529	0.129883	0.489151	1.64736	1.47931	1.34208	0.153414	-0.324759	0.731792	-1.67808	-0.0350508	0.0319219	-1.32447	-2.42243	-1.84875	-0.486484	-0.635547	-0.522787	-0.516372	0.262501	1.06844	0.327477	0.676824	-0.0549259	0.125066	0.691411	-0.295489
35231	ZNF286A	opHsV0400008816	-1.61727	-0.878809	-1.27935	-0.926031	-0.283884	-0.0281375	-0.423852	-0.282067	-0.439603	1.58976	2.17043	2.21633	0.942236	1.21772	1.10869	-0.0715668	-0.480773	0.38615	0.428989	-0.68083	-0.188014	0.734338	-0.643494	-0.335867	-0.884466	-0.726214	-0.624405
19373	IGF2BP1	opHsV0400010701	0.149764	0.309929	-1.03768	0.533725	-0.264132	-0.598702	-0.0156354	-0.539031	-0.691327	1.77671	0.790704	1.16834	2.37676	0.170174	0.877032	0.451257	0.336071	0.937715	-2.05502	0.594673	-0.743827	-0.0976062	-0.0327485	-0.482612	-1.35111	-1.12611	-1.43731
35380	ZNF446	H200007596	0.792582	-0.427163	0.676783	-0.203954	-1.32341	0.947495	1.99955	0.787274	0.891638	-1.13305	-1.32925	-1.16566	-1.25029	-2.28216	-0.771175	-0.43469	-0.0942439	-0.792829	0.356837	0.429194	0.630546	1.06776	0.784522	0.473292	0.897083	0.694917	-0.221592
1750	H300015968	H300015968	-0.728685	-0.633058	0.725729	-2.51646	-1.83172	-1.00583	-0.438904	-1.53375	-1.2812	-0.0118192	0.389193	0.283318	1.56241	0.66236	0.0481466	0.520366	0.318475	0.24082	0.860497	0.98655	0.896196	0.381084	-0.25552	0.385096	0.686688	-0.337857	1.62787
35469	ZNF540	H300014419	0.909959	-0.576203	1.57551	0.233015	0.529111	1.59649	0.0809264	-0.165184	0.796838	-1.34798	-1.14571	-1.62353	-1.65441	-1.61867	-1.0064	0.264924	-0.795087	-0.335033	-0.864543	-0.0369591	0.953327	0.960313	1.1957	1.17181	0.426504	-0.060869	0.536153
31251	SLC7A4	H200014753	-1.07222	-0.441027	-1.24425	-2.34135	-1.33892	-1.20888	-0.267335	-0.541888	-0.348789	1.04847	0.847301	1.76937	0.821595	2.24327	1.19104	-0.201603	-0.29096	-0.512617	0.771224	-0.407524	0.313021	-0.21244	0.314827	0.229341	0.0579278	0.524851	0.297556
9566	ABCD3	H300019860	1.21063	0.0828355	0.936273	2.50513	0.787646	2.58349	0.472863	0.358877	0.022564	-0.584943	0.143904	-0.72697	-0.488332	0.184625	0.267103	-0.362001	-0.178417	-0.674295	-0.553192	-1.97989	0.35999	-0.91423	-0.47673	-0.767145	-0.623425	-1.12527	-0.46109
15905	DYDC2	H200004893	-0.704618	0.69679	0.465474	1.7453	1.44135	1.48656	0.616333	0.890786	0.649408	-0.87325	-1.36895	0.0126912	-1.99825	-2.28983	-1.52584	0.195841	-0.470599	-0.289789	0.73804	-0.446652	-0.0310654	0.452492	-0.170947	-0.143203	0.170326	0.467055	0.284554
21977	MCTP1	H300021463	-0.0662296	-0.39673	2.23644	1.71821	1.1485	1.47093	0.336829	1.18327	0.577455	-0.684808	-1.14624	-1.15873	-0.49434	-0.551054	-0.355236	-1.21921	-1.16082	-1.06878	-1.38762	0.776773	-0.026432	-0.579491	-0.541533	0.314679	0.926863	-0.496903	0.644198
8	2003-09-01	H300016613	-0.0777011	-1.11238	0.228721	-0.351974	-0.23069	-0.337253	0.0124748	-0.853556	-0.548665	1.19164	0.783799	1.16742	3.55001	0.344019	1.22371	0.0725537	0.0726049	0.743947	-1.24843	-0.899732	-1.09737	-0.345522	-0.0717543	-0.181881	-0.6337	-0.914793	-0.485505
14445	COMMD3	H200004307	0.925329	0.708195	-0.173613	1.62091	0.732252	1.81021	0.353621	0.180652	0.698212	-1.74326	-1.68497	-1.8647	0.75587	-1.90168	-1.40161	-0.208727	-0.315871	-0.470279	0.0526288	1.18415	0.0669518	-0.131059	0.207834	-0.08621	0.280848	0.29363	0.110686
25157	OR4A15	H300003749	0.935586	0.584948	1.36678	2.21204	1.22451	2.38208	0.198142	0.189684	0.179071	-0.728425	-0.214495	-0.856478	0.26146	-0.240225	-0.253379	-0.630683	-0.853142	-1.17723	-0.0349411	0.911004	0.170791	-0.607932	-0.752964	-1.42015	-0.805477	-0.717029	-1.32354
7615	opHsV0400011783	opHsV0400011783	0.493148	0.284782	0.0828277	0.545678	0.329574	-0.0336789	0.39422	1.04665	1.6394	-1.23787	-0.979551	-1.411	0.0652692	-0.182364	-0.66983	-2.24863	-1.04231	-1.56528	-0.132037	1.10516	-0.409506	-0.224706	0.422882	-0.0193212	1.91407	0.290845	1.5416
11802	C14orf11	H200001477	1.03815	0.504256	-0.00259071	1.31485	1.37895	3.70957	0.648039	0.18942	0.436652	-0.261276	-0.585933	-0.837576	-0.40787	-0.250123	-0.598753	-1.04687	-0.744102	-0.756137	-0.369014	0.238557	-0.551575	-0.323829	-0.778636	-1.09834	-0.0904031	-0.38151	-0.373898
21906	MBNL3	H200004297	0.0936906	-0.14568	1.4865	-0.6432	-0.496088	0.0415637	-0.926067	-0.546075	-0.131704	-0.890814	-0.717885	-0.91625	-1.69961	-0.328167	-0.701934	-1.06424	-0.399222	-0.60387	0.113604	-0.888426	1.05788	0.981283	1.90069	1.40083	0.637489	1.56154	1.82416
28295	Q8NA50_HUMAN	H300006381	-0.389391	-0.488225	1.68857	-0.413555	0.705912	0.753707	0.933323	0.0864601	0.623571	-0.802234	-1.00076	-0.777072	-2.79749	-1.04631	-0.389522	-1.15744	-1.11537	-0.100966	-0.403328	0.836361	1.46232	0.956145	0.811947	1.14813	-0.0619268	0.426994	0.510151
3187	opHsV0400004968	opHsV0400004968	0.360935	-0.450551	0.839991	1.85103	1.95208	2.53648	0.163085	0.522079	-0.0457198	-1.50817	-1.29645	-1.29603	-0.655094	-0.82215	-0.450986	-0.889543	-0.7137	-0.670564	1.29373	-0.544993	0.303109	-0.0493656	-0.297577	0.240733	-0.266119	0.00768849	-0.113925
14569	CPSF1	H200007054	-1.14785	0.435045	-1.2152	-1.96696	-1.27611	-0.142551	-0.746688	-1.61002	-1.02431	0.131969	0.881857	0.907675	0.32855	-0.185194	-0.0647773	1.52349	1.59416	2.02356	0.377239	-1.10366	0.264885	0.801417	0.0545051	0.608961	0.323842	0.123949	0.102216
22137	MGST2	H200006857	1.62875	0.527683	3.38568	1.70949	0.84278	0.397751	0.239422	-0.0491279	0.571711	-0.468538	-1.02986	-0.997272	-0.126874	-0.555736	-0.381395	-0.625853	-0.432297	-0.535242	0.155425	0.152074	-0.076231	-1.01083	-0.870678	-1.14654	-0.337892	-0.271446	-0.694963
18677	HISPPD1	H200003607	2.06225	0.294469	1.86471	1.26991	0.505551	0.265956	1.14959	0.932881	0.505975	-0.298028	-0.779191	-1.87737	0.197599	-0.796737	-0.0982417	-1.22874	-0.885464	-1.0581	-2.18367	-0.231532	0.0622957	-0.258771	0.390224	-0.272151	-0.261152	0.479764	0.247985
8726	opHsV0400012998	opHsV0400012998	0.814619	-0.860191	1.49197	-0.0533919	-0.155281	-0.620061	0.668517	0.121136	0.639555	-1.19992	-1.43047	-1.40233	-1.10733	-1.11076	-1.46043	-0.332048	-0.283122	-0.53094	-0.87138	0.55574	1.32991	0.301092	0.799882	0.880819	2.03396	0.387473	1.39299
27469	Q1MX18-4	H300003294	-0.230955	-2.99597	0.0998932	-0.326748	-1.0084	-1.24202	-0.57506	-0.164512	-0.322462	-0.782431	0.233654	-0.491249	-0.239615	-0.421423	-0.121293	-0.643129	0.388435	-0.0332676	1.65704	1.17686	1.67235	0.77597	0.482907	0.601274	1.29298	-0.278117	1.49528
4355	opHsV0400007888	opHsV0400007888	-0.258727	-0.0630281	-1.1943	-1.32242	-0.588064	-1.56476	0.435884	-0.0510625	0.108416	1.67779	1.14346	1.42726	0.472961	1.29419	0.0380268	1.21434	0.404994	1.60033	-2.54224	-0.1361	-0.746679	-0.543406	-0.121576	-0.145054	-0.0586186	-0.29724	-0.184376
15280	DDX3X	H200013620	0.830177	-0.254235	0.6431	2.17053	2.1685	2.28526	0.276377	0.579007	0.394492	-0.823243	-0.732044	-1.39411	0.171719	0.108895	-0.0157413	-1.20358	-1.19827	-1.04433	-0.251651	0.698532	-0.414377	-0.733143	-0.758221	-0.578406	-0.311653	-0.296911	-0.316673
16761	FAM54B	H300009142	0.101066	-0.163038	0.0379155	2.1248	2.57597	1.52298	0.920178	0.408047	0.400051	-1.24107	-1.44989	-1.41446	-0.676126	-0.698907	-0.691237	-0.544874	-0.7872	-0.629848	-1.19661	0.730801	0.584046	-0.671916	0.0786728	0.132239	0.209336	0.0032814	0.335771
13987	CHMP5	H300007376	1.78644	0.496263	0.831519	1.67333	1.51607	1.39654	0.647963	0.661957	0.237842	-0.484994	-0.687058	-0.792179	0.402957	0.360871	-0.172599	-0.830549	-0.812638	-0.98823	-1.91849	1.51676	-0.53098	-0.871658	-0.939983	-1.13943	-0.373852	-0.708643	-0.277214
19937	K1688_HUMAN	H200011389	-0.553453	0.152109	0.0245423	-1.53113	-1.77677	-2.70379	-0.416903	-0.328005	-0.108424	-0.651688	-0.159084	-0.131403	-0.70367	-0.576777	-0.999447	0.553112	0.523204	0.746747	1.35941	0.753126	1.48695	0.563137	1.03535	1.03361	0.777696	1.05487	0.576678
35537	ZNF598	opHsV0400005769	-0.917241	-0.877776	-0.835823	-1.00429	-1.38789	-0.394626	-0.553975	-0.848119	-0.822111	0.779838	1.39086	1.48985	0.952286	-0.251677	-0.162632	1.1428	1.17626	1.85739	-1.64118	-1.75047	0.22727	0.34555	0.325417	0.724313	0.344144	0.143919	0.547916
9966	AGR2	H200010467	2.62039	0.988021	0.428322	-0.14497	-0.746815	0.127137	0.62394	0.986604	0.312317	-0.288501	0.100736	0.243168	-0.0944589	0.289135	0.695169	1.06197	1.00025	1.05071	-1.68139	-0.189175	-1.34508	-1.28394	-1.57825	-1.32619	-0.907021	-0.224505	-0.717558
29437	RETSAT	H300019857	-0.80519	-0.459993	-0.834676	-0.616423	0.264821	-0.761737	-0.90483	-1.18805	-0.869402	1.69327	1.91085	1.50912	-0.0629643	-0.209445	-0.213523	1.67278	1.06876	1.714	0.370043	0.372199	-1.50875	0.524503	-0.590805	-0.0564088	-0.465375	-0.946886	-0.605891
9525	ABCA5	H200008439	1.01734	0.596115	1.53918	1.20032	0.733976	0.662957	1.62792	0.778676	1.12034	-0.0283984	0.161857	-0.840503	0.78965	0.29793	0.164919	-1.79974	-1.26358	-2.13103	-0.407361	0.438097	-0.0920433	-0.962127	-1.27209	-0.814165	-0.601615	-0.229346	-0.687267
17733	GGT1	H300019155	-0.184596	0.500255	-0.727885	-2.22466	-1.70173	-2.69698	-0.309939	-0.971901	-0.438835	0.43841	0.574235	1.71109	0.00136027	1.18825	0.281426	1.28868	0.765071	0.783725	0.126363	0.209747	0.880263	0.0522145	0.0129623	0.376349	0.0296845	0.179176	-0.14274
31012	SLC26A10	H300021930	-0.462245	0.432176	-1.62617	-1.05944	-0.958313	-0.462318	-0.156776	0.485652	-0.360998	2.6098	1.68715	0.401389	1.59081	0.495008	0.501176	0.900913	0.52273	0.55278	0.399062	-0.402657	-1.26879	0.203655	-1.57655	-0.903684	-0.565945	-0.492759	-0.485667
3060	opHsV0400004630	opHsV0400004630	-1.17208	0.105236	-0.500573	-2.27155	-2.17475	-2.28356	-0.366383	-0.454767	0.106927	0.126798	0.876515	1.81912	0.830427	1.14045	0.609591	0.345142	0.104882	0.563033	1.14636	-0.212531	0.297639	0.585569	0.0832425	0.328088	0.245342	-0.0665241	0.188371
35384	ZNF451	H200008041	0.739024	-0.257994	1.7268	2.06727	1.30278	2.74338	-0.0216095	0.668564	0.0483781	-0.47419	-0.154902	-0.919767	0.483476	-0.0619818	-0.0671743	-0.639228	0.0107655	-0.793097	-0.836432	-1.43022	-0.695032	-0.837055	-0.884824	-1.01854	-0.561545	0.00263164	-0.13948
11587	C10orf22	H200010994	-0.205771	-0.0486885	0.719635	1.4625	1.35178	2.05566	-0.27418	0.518768	0.729311	-0.71935	-1.19051	-1.37586	-0.84158	-0.723101	-0.769476	-1.01701	-1.20587	-1.20259	-0.155216	0.670567	-0.432253	-0.0331774	2.43402	-0.0701135	0.166248	-0.198179	0.354443
9666	ACO1	H300019786	-0.302011	0.181567	0.582865	2.11899	1.39004	1.56549	1.00187	0.867965	0.953275	-0.160699	-0.795361	-0.950132	-1.56262	-1.73784	-1.11975	-0.333344	-0.45401	-0.550283	-1.27829	1.43518	-0.322521	-0.520017	-0.379765	-0.67956	0.434968	0.151649	0.46236
27864	Q6ZSJ3_HUMAN	opHsV0400003744	-0.900222	-1.43546	-0.980755	-1.66743	-2.14177	-1.39733	-0.404941	-0.487116	0.14508	0.767869	1.08824	2.08277	0.139086	0.708809	-0.163541	0.321177	-0.134325	0.164311	0.221323	2.14819	0.315308	0.470527	0.153793	0.426256	0.649681	-0.0583931	-0.0311395
14539	CPEB2	H300009269	0.431771	0.27803	0.855264	2.25536	2.18781	2.13393	0.218965	0.287828	0.618691	-1.14947	-1.05512	-1.50388	0.185506	0.00929221	0.567982	-0.517127	-0.515698	-0.271258	-0.282314	-0.159689	-0.394365	-1.21227	-1.40145	-0.490746	-0.473302	-0.478847	-0.124904
18327	GTF2I	H200017316	-0.461992	0.299381	0.0916148	2.82478	1.94007	1.52853	0.57816	0.643984	0.630175	-1.60189	-1.24228	-1.55784	-0.39909	-0.324842	-0.525034	-0.817781	-0.91531	-0.611581	0.12015	-0.791394	-0.474987	0.145681	-0.11441	-0.230732	0.356889	0.382537	0.527217
24844	O14733-2	H300022838	-1.05297	0.770799	-0.773917	-1.99934	-1.44701	-1.46808	-0.336157	-0.231038	0.00999736	1.54458	1.47633	2.16925	0.81398	1.40723	1.08708	0.250211	0.185184	0.0405767	0.499145	0.205327	-0.787689	-0.212152	-0.434027	-0.223639	-0.191134	-0.576675	-0.725863
5623	opHsV0400009515	opHsV0400009515	-0.293347	-0.602554	-1.38699	-3.1301	-1.46911	-1.09491	-0.756353	-0.600908	0.130875	0.274021	1.11609	0.961179	1.18775	1.01847	0.900877	0.412347	0.371102	-0.619359	0.401676	-0.808282	0.46463	0.549805	0.844372	0.609178	0.323412	0.386237	0.809897
32731	THUMPD3	H200004005	2.29786	0.405905	0.0983601	0.774355	1.42547	2.00192	0.729867	0.634192	0.665122	-0.501455	-0.385806	-1.10787	-0.218447	-0.45984	-0.268611	-1.20263	-1.04694	-1.16161	1.55467	-0.839007	-1.27411	-0.831469	0.320271	0.0835335	-0.869086	-0.275155	-0.549508
17396	FUBP1	H300014195	1.74334	0.0317259	0.589577	1.38259	1.50492	0.775172	0.818518	1.04841	0.489999	-1.79595	-0.920967	-1.91108	-0.538506	-0.881072	-0.766743	-0.516125	-0.175836	-0.128039	0.471775	-2.20589	0.45477	0.622235	-0.126699	0.524049	-0.306842	-0.246366	0.063021
13551	CD38	H200005596	-0.472384	-0.0647369	1.02598	-0.014999	0.0439254	0.930454	1.27181	-0.184773	1.03076	0.330468	0.199493	0.190874	0.401704	0.534227	0.659502	1.38522	1.27348	0.660672	0.260304	-0.325366	-1.34665	-1.04024	-2.19327	-1.79421	-1.27515	0.320246	-1.80732
33714	TTC21B	H300021814	2.04778	0.417036	0.0551144	0.817933	1.39481	3.35568	0.344182	0.617124	0.11686	0.0130882	-0.370696	-0.651257	0.0473922	-0.0607401	-0.260014	-1.09535	-0.389999	-0.568016	-0.0904125	-0.601296	-0.910696	-1.20024	-0.885723	-0.841576	-0.507809	-0.0597607	-0.733413
32574	TESC	H300019556	-0.0705091	-0.199376	0.881712	-0.58508	-0.936244	-0.20416	-0.439094	-0.271368	-1.67726	-0.0366004	1.80611	1.70355	1.15592	-0.464044	0.344268	1.38748	1.69391	1.60239	0.486542	-0.153877	-1.02074	-0.762616	-0.910075	-1.04157	-0.976038	-0.538015	-0.775221
8670	opHsV0400012935	opHsV0400012935	-0.433132	-0.019633	2.57653	1.41138	1.51964	1.45236	0.537957	0.476567	0.64255	-0.779057	-1.3216	-0.99641	-1.48287	-1.5223	-0.871276	-0.277215	-0.330874	-0.321285	-1.42378	0.534037	-0.0377349	0.0330876	-0.292714	-0.186829	0.564904	0.180192	0.367506
20918	LEP	H200014610	0.776484	0.584666	0.934043	0.334254	0.363012	0.897123	0.826093	1.18505	-0.142975	-0.331332	0.543994	0.525759	1.00087	0.716945	-0.762817	0.0568621	1.56942	0.105243	-2.90787	-0.0779942	-0.0675868	-1.57324	-0.792137	-0.893119	-1.41135	-1.14603	-0.313366
34076	UGT2B10	opHsV0400000355	1.39877	-0.153623	1.26546	0.548725	0.0881263	0.85961	0.425926	0.72352	1.38859	0.672029	-0.296711	0.362596	0.592559	0.278148	0.562082	-0.22849	0.737833	-0.253657	0.678306	0.411978	-0.663945	-1.28034	-2.20946	-1.843	-1.14218	-1.24158	-1.68128
27622	Q5T345_HUMAN	H300015167	-0.948436	0.2812	0.0793438	-2.23803	-2.62537	-2.22155	0.119748	-0.761669	-0.128964	0.812561	0.505592	1.4194	0.605659	1.07406	1.12243	0.683868	1.00541	0.32974	0.0917793	0.00600398	-0.0430788	0.172595	0.142525	0.128946	0.243367	0.3192	-0.176342
34031	UBTF	H300021198	-0.711605	0.580951	-0.352294	-0.776238	0.129199	-0.556379	-0.42666	-0.371267	0.0201961	0.936366	1.25903	1.30268	0.74962	0.693317	0.721337	1.09706	0.878955	1.34368	0.249047	1.4589	-1.72449	0.0137301	-1.92646	-1.20283	-1.05053	-1.41915	-0.916157
33413	TRAPPC5	H300007286	1.01364	0.388616	0.00643883	-0.665545	-1.04188	0.166665	0.557433	0.192673	0.855429	-1.81389	-1.1659	-1.08002	-1.33893	-2.08793	-1.46593	0.432405	0.241592	-0.395148	0.432922	0.563613	-0.0192254	0.902758	0.41689	1.08866	1.37797	1.46333	0.973374
22567	MT1X	H300008824	-0.433948	-0.0951767	1.22481	1.67855	1.44701	1.46545	0.482846	0.0640077	0.440709	0.46279	-0.180589	0.113204	0.292872	-0.155212	-0.275284	0.991645	0.716766	0.821293	-0.468355	0.306726	-1.86058	-1.44614	-1.77492	-1.94037	-0.447666	-0.407122	-1.02332
28873	Q9P156_HUMAN	H300001163	0.891484	0.770039	1.16876	1.83203	1.78638	1.75885	0.343861	0.0014608	0.715845	-1.00621	-1.26715	-1.27987	-0.812436	1.13546	-0.723483	-0.545123	-0.399345	-0.183052	-0.029406	0.970757	-0.97279	-1.25202	-0.953201	-0.94371	-0.042708	-0.609342	-0.355084
22540	MSL3L1	H300021641	0.519422	-0.07267	0.269073	1.54811	1.8085	2.1236	0.00691668	-0.0482771	-0.00658543	0.401486	-1.18989	-1.86074	-0.600264	-0.881058	-1.0676	-1.1892	-1.35492	-1.35578	0.240263	1.34147	0.961662	0.159662	0.476602	-0.0788667	-0.119255	0.0665352	-0.0981948
25944	PDZD7	H300012368	0.292562	-0.112182	0.7354	1.86716	2.06511	2.79895	0.0975504	0.179798	-0.172603	-1.36671	-1.43143	-1.38481	-1.23975	-1.17441	-0.540181	-0.32569	-0.391024	-0.445741	0.0933562	-0.038923	0.177105	0.187414	0.230949	0.161229	-0.187424	0.0328984	-0.108597
17686	GDNF	H300011850	-1.20542	-0.0328403	-0.320389	-0.746641	-2.11193	-1.21924	-0.656451	-0.697416	-0.426558	1.34293	1.85341	2.25376	0.678159	2.10345	0.700279	-0.172047	-0.0775384	-0.138118	0.422311	-0.304879	-0.560204	0.249819	-0.598117	0.113583	-0.171886	-0.193028	-0.0849903
33182	TNFRSF14	H300017262	-0.870764	-0.301906	0.478677	-2.57535	-1.72204	-0.598165	-0.0309835	-0.587159	0.226669	-1.38745	-0.481131	-0.461222	-0.108596	-1.29031	-0.234968	0.0915362	0.592979	0.120111	1.57398	1.06532	0.672522	0.642132	0.675617	0.98657	1.18538	1.0161	1.32246
11773	C13orf1	H200004685	0.288475	-0.152257	0.705644	0.477861	0.264927	0.0466062	0.648424	0.936204	0.554714	-1.85781	-1.02022	-2.42006	-1.30869	-1.94965	-1.48428	0.165349	0.443803	0.198585	0.0442224	-0.180058	0.683736	0.91149	1.08309	1.03475	0.598995	1.08936	0.196787
31902	ST3GAL6	H300019983	0.758434	0.388864	3.29871	1.41638	1.12697	1.05088	0.356447	0.64517	0.235941	-0.449922	-0.889957	-1.06725	-0.375149	-0.361677	-0.357329	-0.40542	-0.382396	-0.664496	-1.52339	1.12705	-0.0944011	-0.692933	-0.534133	-0.759603	-0.499462	-0.554799	-0.792537
31573	SOS2	H200020273	-0.0784361	-0.104095	1.05953	2.30973	1.37584	2.66295	0.0722085	-0.157879	0.218418	-0.30102	-1.12262	-1.2228	-1.26331	-1.38268	-0.889998	-0.887064	-0.721332	-0.793016	-0.019159	0.935383	-0.102702	-0.0582439	-0.178245	-0.216861	0.0403859	0.601521	0.223496
20721	KRTHB4	H300004182	1.37575	0.410577	0.0233876	1.29686	1.78099	1.10385	0.394607	-0.254283	0.00865375	0.415861	1.05152	0.254707	0.621693	-0.150167	-0.232827	0.521608	0.458209	0.0214435	-1.00844	0.9895	-1.31103	-0.168307	-1.36313	-1.60657	-1.45991	-1.54451	-1.63003
29086	RAB7A	H300017796	-0.0488514	0.516454	2.02877	1.97599	1.79623	0.999065	0.224941	-0.333443	0.477738	-1.88445	-1.54284	-0.967196	-0.820885	-1.96529	-0.75111	-0.246625	-0.0544605	-0.160182	0.14464	0.840701	0.18311	-0.0756278	-0.124494	-0.14037	0.0403026	-0.394451	0.282343
30361	SDHD	H200007763	-0.334423	0.52259	1.26194	2.37408	2.02514	2.01459	0.437929	0.333418	0.613881	0.0674039	-1.33184	-0.763072	-0.26711	-1.08946	-0.488559	-0.557574	-0.54362	-0.364956	-0.139652	0.70671	-0.928835	-1.17127	-1.03654	-1.03485	-0.00274202	-0.20018	-0.103004
13020	CALB2	H300015659	-0.350231	-0.165461	1.39874	-0.707039	-0.048388	0.258302	0.445782	0.679352	-0.0398476	-1.8123	-1.77077	-1.0505	-1.23913	-0.412322	-2.53834	-0.21628	0.156037	0.207783	0.453448	1.29672	1.41589	1.01539	0.680459	0.84919	0.621233	0.398779	0.473495
1219	H300008056	H300008056	-1.05074	-0.411502	-0.627848	-0.0941628	-0.329917	-0.0740364	-0.413966	-0.111509	-0.439299	1.13353	1.37348	2.21329	0.648416	2.92171	1.08272	0.11851	0.0971833	-0.382232	-0.0166364	-0.169788	-0.89221	-1.03428	-1.16926	-1.35125	-0.367928	-0.208376	-0.443894
27316	PTPN2	H300021421	0.549195	0.242283	0.0862295	1.54693	3.48916	1.95281	0.476482	0.867461	0.0277105	-0.540061	-0.351365	-0.883388	0.0916566	-0.284464	-0.364035	-0.643164	-0.207472	-0.619824	-0.513143	-0.679704	-0.858807	-0.310852	-0.322332	-0.372495	-0.614654	-0.509931	-1.25422
31693	SPESP1	H200021247	-0.15389	0.0683172	0.84742	0.556164	0.59433	0.701593	-0.410151	2.82789	-0.11655	0.61916	-0.255264	-0.0355383	1.35861	0.960506	1.12174	0.168169	0.259636	0.168847	-1.80912	-0.0760592	-0.967419	-1.06068	-1.05473	-1.21296	-1.31462	-0.700506	-1.0849
2739	opHsV0400003496	opHsV0400003496	-0.534839	1.24388	-0.0595847	0.401595	-0.120917	0.591153	-0.789333	-0.645332	-0.688773	0.935196	1.48052	1.17424	2.04276	0.956413	0.831767	0.643827	0.370299	-0.108404	-0.101953	0.176737	-1.36661	0.310395	-1.6995	-1.21577	-1.32189	-1.05726	-1.44863
15488	DIRC2	H300014257	0.0461584	-0.496842	0.637891	-0.0844971	-0.528376	1.25962	0.579582	0.393814	0.0949954	-1.65659	-1.05389	-1.35761	-0.622064	-0.911356	0.705215	-1.45157	-1.43038	-1.0449	2.25841	-0.310272	1.57799	0.386721	-0.115018	0.682414	0.745479	0.79404	0.90103
33704	TTC15	H200000973	-0.930614	-1.11768	-0.204523	-0.111709	-2.61045	-2.06415	0.00463005	-1.22368	-0.0821136	1.0732	1.98194	1.67191	0.133522	0.212195	-0.0142852	0.811883	0.876703	0.960856	0.273527	0.295743	0.399569	-0.262151	0.0721484	-0.679702	0.247524	0.111586	0.174128
20504	KLHL2	H200012412	0.131471	0.217243	1.42286	1.91802	1.99287	1.94746	-0.0397231	0.322781	0.167733	-1.2937	-1.09779	-0.354847	-0.340792	-0.0441001	-0.193428	-1.26314	-1.85196	-1.56484	0.808019	0.222788	0.16999	-0.75334	-0.381022	-0.348651	0.0100011	0.33776	-0.141661
24670	NSMCE2	H200020068	1.18864	1.32952	0.66373	1.26251	1.79405	1.66895	-0.186351	-0.372143	1.11022	-1.69536	-1.95983	-1.19216	-0.508846	-1.18202	-0.744946	-0.341426	0.297108	-0.223854	-0.145667	0.273854	-0.965565	-1.11442	0.0106	-0.128445	0.239546	0.422096	0.50021
34335	VDAC2	opHsV0400000659	1.025	-0.0145823	-0.161182	1.48974	1.75577	1.6523	-0.312812	-0.267291	-0.664485	-0.500265	0.759951	0.0658712	0.684899	0.33204	0.660718	0.667376	0.880382	1.23376	-0.471495	-0.569474	-2.11342	-1.03359	-0.672772	-0.717628	-1.0537	-1.37948	-1.27562
13325	CCDC5	H200014254	0.161314	0.846399	1.71794	1.5045	0.76377	1.10309	0.319065	0.0420275	0.224315	0.482437	0.149403	-0.382993	0.781828	1.78755	1.06446	-0.451873	-0.41378	-0.770961	-0.820655	-1.78175	-0.281287	-0.7133	-0.132049	-1.62132	-1.16046	-0.747291	-1.6704
16132	EIF3S10	H200014832	1.60486	-0.0136578	0.724365	2.65608	1.68236	2.07978	0.189583	0.269114	0.0600367	-1.19583	-0.474351	-1.6406	-0.0346516	0.123403	-0.0343887	-0.698835	-0.681822	-0.699032	0.0701407	-0.251872	-0.000819858	-0.388196	-0.291802	-0.595466	-0.819857	-0.598497	-1.04005
31965	STAT3	H300012213	-1.13514	0.52162	-0.710714	2.05573	1.90405	1.04862	0.386861	0.686878	0.834271	-0.734011	-0.676518	-1.19732	-1.59446	-1.30991	-1.28539	-0.791169	-0.703447	-0.926997	0.670188	1.22806	-0.64511	0.400173	0.278961	0.531033	0.378978	0.380496	0.404247
19835	ITIH5	H300017818	0.474533	-0.614165	1.76578	0.955931	1.65627	1.76518	-0.190908	-0.628311	-0.863794	-0.947644	-1.52625	-1.09203	-1.02428	-0.972898	-0.261612	-1.17763	-1.01429	-1.26482	0.783708	0.689687	0.784208	0.377325	1.03014	0.860852	-0.134648	0.282989	0.286676
16131	EIF3S1	opHsV0400000291	1.11148	0.393243	-0.267032	2.40483	1.70346	2.77534	0.450786	0.468822	0.245835	-0.614562	-0.175281	-0.421723	0.0201996	-0.404026	-0.147926	-0.759894	-0.951116	-0.993127	0.483145	-1.00402	-0.349657	-0.911769	-0.38672	-0.4776	-0.750468	-0.366404	-1.07582
10785	ARV1	H200003268	1.72303	0.745105	0.253776	2.50935	1.6705	1.48643	0.601476	-0.191786	0.398843	-0.917763	-1.04306	-1.22097	0.215006	-0.200949	0.0751432	-0.789172	-0.426836	-1.42465	0.295329	-0.427472	0.0261436	-0.29975	0.244639	-0.291471	-1.02246	-0.410461	-1.57798
26448	PLSCR1	opHsV0400003753	1.67118	-0.0797894	1.35444	1.58452	1.32809	1.29437	0.771373	0.829926	0.43867	-1.28675	-0.168726	-0.875648	-0.38116	-0.50077	-0.26952	-1.19545	-0.706261	-0.372451	-2.92917	-0.317526	0.291441	-0.386298	-0.118096	-0.0791692	0.102731	-0.0634458	0.0634782
23247	NKX2-3	H300000382	0.240283	-0.421388	-1.19804	-1.15811	-1.83703	-2.07394	-0.17362	-0.514449	0.34452	1.52986	0.982116	1.27532	0.00368881	0.986858	0.547701	1.19646	0.849905	1.51382	0.393721	-1.26604	-0.0583308	-1.08076	-0.69716	-0.552688	0.193204	0.574719	0.399375
33661	TSPAN16	H300015795	-1.3897	0.452851	0.772283	0.258962	0.585114	1.2	0.619739	0.407552	0.226018	1.16563	0.870109	1.18691	0.967952	1.37746	0.77738	0.204418	-0.169849	-0.371633	-0.269678	0.168419	-1.48609	-1.26569	-2.14037	-1.81349	-0.855103	-0.601855	-0.877349
26967	PRKD1	opHsV0400002325	-1.04474	0.26097	-1.0923	-1.82781	-1.79559	-1.98457	-0.140108	-0.539818	-0.0496846	1.09684	1.38748	1.61376	1.18908	1.53997	0.696351	0.270333	-0.248608	0.322178	1.43529	-0.308423	-0.13216	0.0371885	-0.323947	-0.515456	0.205067	-0.00570867	-0.0455732
17316	FOXP4	H300004099	-0.370345	0.436406	-0.0108499	-1.08442	-0.951501	-1.17596	-0.220248	-1.74825	-0.0231234	1.95285	1.84044	1.81372	1.4253	1.4553	0.992545	0.123054	-0.169331	-0.161569	0.00216333	-0.148774	-1.07809	-0.848658	-0.619032	-1.02068	-0.2244	-0.0211495	-0.16539
20770	LAMB3	H200006124	-0.502531	0.498013	-0.105897	-0.469875	-0.539135	-0.814604	-0.0422346	-0.426976	0.135831	1.86728	1.96465	1.87783	1.30551	1.57393	0.929423	-0.0437215	-0.19948	-0.338585	-0.346187	0.200438	-1.42749	-1.50205	-1.39	-1.12088	-0.322033	-0.368699	-0.392517
21077	LMNA	H300022333	-0.626982	0.563402	-0.760229	-2.74626	-1.69963	-1.73354	-0.709881	-1.14218	-0.435269	-0.435557	0.74545	0.877794	0.112289	0.149698	-0.160419	0.866634	1.20828	1.3946	1.42686	0.482642	0.499181	0.524571	0.288323	0.58174	0.45803	-0.0697141	0.340168
19198	HSPE1	H200000309	1.94374	1.51729	0.202059	0.887333	-0.27053	0.0823467	0.437145	0.806712	0.504615	0.350622	1.02899	0.142836	1.49159	0.994602	0.236447	-0.0851374	-0.49741	-0.655647	-0.13253	-1.14468	-0.91132	-1.28241	-1.34113	-2.31189	-0.521789	-0.258166	-1.21368
35102	ZNF138	opHsV0400005466	0.174213	0.10422	0.677204	2.06273	2.65738	2.50305	0.332807	0.75559	-0.0381784	-0.197531	-0.532936	-0.780505	0.201606	-0.147392	-0.0595562	-0.750297	-0.717142	-0.693578	-0.630435	-1.50561	-0.935117	-0.159594	-0.524263	-0.587602	-0.36101	-0.471719	-0.376338
2072	opHsV0400000749	opHsV0400000749	0.452235	0.739036	1.50029	1.94171	2.19118	2.01725	0.105624	-0.0902052	0.427794	-0.864438	-1.21587	-1.02522	-0.403624	-0.710124	1.03406	-0.501494	-0.412454	-0.870351	-0.0186291	0.509468	-0.903026	-0.881132	-0.779583	-0.886089	-0.235074	-0.42944	-0.691898
35161	ZNF207	opHsV0400003158	0.334156	0.308881	0.628454	2.27227	1.77209	2.07976	0.771315	0.541289	0.542875	0.148599	-0.733933	-0.720521	-0.259624	-0.342894	-0.35698	-0.518157	-0.439018	-0.637966	-2.83149	-0.738272	-0.0480422	-0.447068	-0.296887	0.130994	-0.336361	-0.455737	-0.367729
32350	TATDN1	H300020380	2.01084	0.536235	0.618649	1.99058	1.40725	1.00621	0.151108	1.00573	0.520807	-1.33564	-0.889738	-1.33613	0.688477	0.404732	0.270665	-1.29594	-0.829219	-1.10327	-1.91354	-0.0390952	-0.462255	-0.229111	-0.275427	-0.563652	-0.0615202	-0.0918733	-0.184879
34294	VAMP1	H300021054	-1.35002	-0.21948	-0.517693	-0.346448	-0.19169	-0.861293	-0.250136	0.0492834	0.0908816	1.59219	1.79121	0.903584	1.90526	1.50702	1.6536	-0.180174	-0.065174	0.112654	-1.26481	0.732382	-1.76532	-0.89438	-0.985561	-0.51674	-0.13534	-0.497893	-0.295914
6229	opHsV0400010179	opHsV0400010179	0.335105	-0.269326	1.29691	3.00333	1.10399	2.45391	0.365251	0.780834	0.144482	-0.451101	-0.721649	-0.534862	-1.03828	-0.175546	-0.923361	-0.110137	0.109414	0.290508	-0.45498	-1.04807	-0.585087	-0.457323	-0.293596	-0.492689	-0.705168	-0.931724	-0.690823
619	H300000502	H300000502	-0.898322	0.161311	-0.369204	-1.82158	-1.91116	-3.07062	-0.546922	-0.743631	0.0123473	0.866533	0.793053	0.596316	0.544398	1.43611	0.20829	0.596507	0.485572	0.28641	0.862732	-0.720414	0.465069	0.747985	0.468562	0.434939	0.570933	0.423443	0.121349
5052	opHsV0400008713	opHsV0400008713	-1.09472	0.813677	0.137914	-1.37698	-1.32431	-1.4645	-0.794611	-0.988666	-0.7346	1.59616	1.14447	1.61059	0.855766	1.65984	0.584375	0.750851	0.339324	0.337006	1.14251	0.639918	-0.809561	-0.815565	-1.15875	-0.670524	-0.091369	-0.480925	0.192673
25591	PAPOLA	opHsV0400000042	0.543902	0.0296267	0.435949	2.38857	2.42973	2.36625	0.281696	0.360519	0.283351	-1.11161	-1.08878	-1.65498	-0.0435844	-0.418926	-0.240592	-0.449524	-0.415221	-0.70063	-0.252697	-0.79032	-0.477413	-0.50734	-0.312285	-0.258396	-0.299605	0.352594	-0.450274
29603	RIN1	H200000270	-0.849584	0.441823	1.09925	-0.659014	-0.105559	0.172454	-0.00379001	0.541996	0.00401392	0.929597	0.903147	0.757311	1.49164	1.27282	0.864039	0.757335	-0.567158	1.30277	-0.417174	0.838046	-1.49696	-0.593057	-1.57775	-2.16534	-0.923093	-0.750438	-1.26731
2389	opHsV0400002127	opHsV0400002127	-1.86619	-0.315964	-1.76041	-1.74378	-1.76902	-1.39787	0.0199854	-0.6351	0.172641	0.699347	-0.241736	0.167128	0.67416	0.265729	0.102953	1.39749	0.709845	1.02586	1.97261	0.672983	-0.478737	-0.123656	0.194154	0.187718	0.666905	0.543658	0.859305
23158	NFIB	opHsV0400000434	0.511695	-0.680106	-2.14238	-0.480717	-0.56785	-1.42883	-0.559094	-0.845723	-0.383383	2.5767	0.319155	0.842116	0.392248	2.32925	0.422929	0.517901	1.17634	0.404183	-0.0980917	0.353274	-0.150406	-0.314957	-0.08743	-0.502467	0.027817	-0.6697	-0.962475
1464	H300011479	H300011479	-1.71422	0.344018	0.469587	-0.353948	-0.41073	-0.497315	-0.411328	-0.9198	-0.373692	1.42913	1.81878	2.05211	1.5327	0.923948	0.79765	0.491625	0.0188229	0.192356	0.229542	-0.262165	-1.46886	-0.939895	-1.04503	-1.31597	-0.0816633	0.530125	-1.03578
11674	C11orf30	H300020687	1.66011	0.666461	0.530424	-0.263052	0.831747	1.53038	1.70893	1.56961	0.70725	0.0685747	-0.800053	-1.97897	-0.270464	-0.893652	-0.112933	-1.14703	-0.801692	-0.745897	-0.927308	-2.04865	-0.149712	0.0463469	0.258254	0.121063	-0.0799275	0.624996	-0.104797
26236	PIP5K3	H300010436	0.715029	-0.957066	-0.0377831	-0.546285	0.496877	0.186995	-0.175783	-1.44039	-0.59714	1.12089	0.938149	1.57443	0.879164	1.53093	0.883197	0.710831	0.641096	0.689822	-1.96561	1.43048	-1.29815	-1.05915	-0.782383	-0.417981	-0.806415	-0.824385	-0.889389
13449	CCNH	H300019367	1.29247	0.451838	0.471727	1.85643	1.79769	1.59041	0.708886	0.782878	0.309157	-0.126791	-1.00435	-1.28427	0.209875	0.405227	0.145024	-0.701791	-0.543724	-1.00213	-2.78938	-0.367715	-0.536022	-0.400832	-0.0945165	-0.209014	-0.395843	-0.115792	-0.449442
20397	KIF26B	H300006738	-0.0688952	0.766508	-0.0283082	-0.829309	0.416694	0.840702	0.391546	0.208389	0.246948	1.23315	0.473035	0.2931	0.966267	1.25748	-0.249768	1.15229	1.00805	0.770035	0.33137	0.16833	-1.81826	-1.13783	-1.77283	-2.55779	-1.03411	-0.841935	-0.184863
34693	WRB	opHsV0400002682	2.59767	-0.00739737	-0.357372	1.82353	1.63981	0.843002	0.00507739	0.133229	-0.214092	-0.00964986	0.497124	-0.513265	0.559345	0.483675	0.802381	0.198011	0.501175	0.0403582	-1.26369	-0.253304	-0.81137	-1.00671	-0.527227	-1.05817	-1.39669	-1.32529	-1.38016
352	H200011821	H200011821	0.792312	0.677966	-0.102952	2.18294	2.66347	2.41149	0.0615421	-0.112542	0.276777	-0.919359	-0.77564	-1.28856	-0.577233	-1.03308	-0.686538	-0.583147	-0.567844	-0.466318	-0.376074	0.244016	0.163577	-0.5549	-0.145686	-0.463073	-0.0621907	-0.0537663	-0.705188
28863	Q9P0T3_HUMAN	opHsV0400006314	-0.606598	0.280147	-0.528757	-2.42337	-2.27698	-2.56585	-0.163791	-0.554417	0.0853188	0.925291	0.983399	1.1446	0.902199	1.22368	0.342416	0.588579	0.403172	0.583003	0.524878	-0.213862	-0.0653178	-0.00696629	0.381889	0.56674	0.245805	0.14747	0.0773177
15440	DHX15	H200001088	0.356944	-0.173086	0.483363	2.89017	2.13506	1.31007	0.642279	0.940899	0.576454	-0.741446	-0.515836	-0.671177	-0.621392	-0.540443	-0.362142	-1.02475	-0.728737	-0.759529	-0.120196	-2.18734	-0.185403	-0.224831	0.283992	-0.212168	-0.214677	-0.11664	-0.219441
996	H300005215	H300005215	0.064553	0.522944	-0.0273316	2.5379	2.48651	2.53926	0.454775	0.356831	0.231295	-0.6251	-0.93565	-0.630979	-0.73625	-0.227092	-0.447752	-0.584212	-0.640146	-1.1186	-0.167627	-0.0486733	-0.800614	-0.389881	-0.67683	-0.614478	-0.313447	0.000938909	-0.210348
1336	H300009539	H300009539	-0.0211568	0.860124	0.85928	1.61414	1.79095	1.7213	0.148518	-0.218097	0.393022	-1.6293	-0.754196	-1.80674	-0.91586	-2.20063	-1.19556	-0.162622	0.189849	-0.252608	0.782183	0.896204	-0.424635	0.102372	0.0901296	0.258342	0.189477	-0.0337595	-0.280739
16084	EGR3	H200005916	-0.107414	0.687769	0.715031	-0.355938	-0.568493	-1.57709	-0.310088	0.0937853	1.50093	-1.84052	-1.18994	-1.68437	-0.314868	-0.980251	-0.785512	-0.119935	-0.57333	-0.605277	0.33673	1.84674	0.832255	0.10964	1.48992	0.811378	0.985539	0.402341	1.20098
25544	PAG1	H200016561	0.625188	0.125965	1.9603	1.39394	0.822795	1.20986	0.696813	0.96883	1.10921	-0.236021	-0.199521	-1.01549	-0.0423495	-0.0400978	-0.141488	-1.9948	-1.39567	-1.69479	-1.36605	0.107555	0.202139	-0.693998	-0.553894	-0.824865	0.0856005	1.24262	-0.351779
18435	HADHB	opHsV0400009553	-0.118142	0.538599	1.2018	1.91451	1.61354	1.94262	0.651322	0.727144	0.827779	-0.40734	-1.23251	-0.950906	-0.858932	-1.01444	-0.302274	-0.135524	0.176803	-0.107007	-1.488	0.677339	-0.963555	-1.46823	-0.979857	-1.05994	0.275696	0.263711	0.275797
9235	opHsV04NC000001	opHsV04NC000001	0.413829	-0.295082	0.0123376	1.04357	0.826785	1.31463	-0.57591	0.288507	-0.386261	1.31993	0.910679	1.11296	1.10416	0.793876	0.438045	0.713147	0.0739811	-0.0641565	-0.7133	1.13495	-1.87372	-0.977668	-1.16328	-1.45269	-1.00534	-1.28836	-1.70562
21203	LOC642843	opHsV0400004150	-1.31521	0.85537	-0.099775	-1.92024	-1.61233	-1.09423	-0.325471	-0.328192	-0.258767	1.45964	2.14776	1.72915	1.30923	1.40716	0.427607	0.377499	-0.115419	0.389605	-0.719557	-0.186696	-0.955133	0.0481378	-0.230597	-0.00814908	-0.379982	-0.2964	-0.305004
23165	NFKB2	H300011274	0.0623515	-0.0754904	-0.25291	-1.9902	-1.64114	-1.32657	0.0791699	-0.589972	-0.187079	-0.819632	0.318073	0.212343	-0.819144	-0.128345	-0.948545	-0.609296	-0.269872	-0.187599	2.04469	-0.846488	1.31254	1.40869	0.849933	1.09621	1.03675	0.969503	1.30201
11664	C10orf97	H200008813	1.13528	0.368412	0.553348	1.51841	1.52109	2.26588	0.455723	0.445068	0.759722	-0.983726	-1.29801	-2.43407	0.329327	-0.653887	0.347073	-0.535951	-0.451886	-0.794762	-0.387278	0.999411	0.0167842	-0.234229	-0.405281	-0.639457	-0.692936	-0.290737	-0.913319
26722	PPID	H200013397	0.963587	0.295374	0.523086	2.06552	1.51831	1.85579	0.294125	0.516054	0.735008	-0.471998	-0.467107	-1.21526	0.404904	0.710129	0.233342	-0.341705	-0.0510116	-0.487124	-0.536262	1.06348	-1.91275	-0.680591	-0.719345	-0.762632	-1.15414	-1.14439	-1.23439
26706	PPFIBP1	H200013077	-1.04088	-0.731516	-0.723664	-1.98086	-2.00211	-1.21131	-0.449664	-0.370956	-0.0675149	0.977632	1.22388	1.81084	1.27747	2.08772	0.65166	-0.19763	-0.244967	-0.177911	0.786178	-0.876843	0.0641108	0.414924	0.29073	0.303849	-0.0498409	0.298109	-0.0614472
34754	XRCC5	H200007128	1.47184	-0.637109	0.214437	2.32878	1.56966	1.39516	0.74566	1.24874	0.416211	-0.407297	0.236877	-0.759448	1.17137	0.0482896	-0.216151	-0.502569	-0.298778	-0.915439	-0.810779	-1.8258	-0.593658	-1.24077	-0.519426	-1.03634	-0.476822	0.0297715	-0.636409
2609	opHsV0400003049	opHsV0400003049	-0.36711	-0.519476	0.0696448	-0.0859907	0.518296	-0.101552	-0.674393	-0.848213	-0.0937108	0.0964018	1.81643	1.23393	0.21068	1.46586	1.15275	1.90911	0.556081	0.460206	0.415707	0.605648	-0.44776	-1.93093	-1.74828	-1.49425	-1.01025	-0.352477	-0.836361
22643	MTR	H200006920	2.475	0.540684	1.02241	1.37562	1.99833	1.6455	-0.720485	0.401132	0.217721	-0.549306	-0.39801	-0.615451	0.57298	0.241207	0.554025	-1.01153	-0.231353	-0.852032	-0.532006	-0.136617	-0.820723	-0.722524	-1.11384	-0.613912	-1.28602	-0.527644	-0.913143
12617	C5orf21	opHsV0400003614	-0.675269	0.307297	-0.0389676	-2.1382	-1.90807	-1.96487	-0.450137	-0.471459	-0.126055	1.151	1.18926	1.87566	1.0277	1.76863	0.743827	0.355467	0.136556	0.295504	0.78798	-0.501694	0.136311	-0.367197	-0.506664	-0.624043	-0.0363255	-0.111143	0.144898
13106	CAPS	H300005366	-1.02488	0.627057	-0.857869	-1.0828	-1.23542	-1.39969	-0.482132	-0.560029	-0.270524	0.608486	1.65252	1.96311	1.67754	2.4055	0.772112	0.151989	0.0196836	-0.165716	0.759734	-0.585508	-0.608112	-0.347286	-0.700476	-0.371648	-0.266661	-0.337822	-0.341154
26717	PPIA_HUMAN	opHsV0400005822	-0.14594	0.0531286	0.987085	2.5421	2.52797	1.77558	0.159959	0.211399	0.33069	-0.0878066	-0.248321	-0.777519	0.0664742	0.100234	0.00129864	-0.125088	0.0892273	0.151699	-0.629129	-0.190882	-1.15888	-1.27887	-1.3266	-1.26131	-0.384339	-0.361724	-1.02043
31776	SPTBN2	H200003704	-1.63386	-0.448707	-0.149085	-0.282125	-0.596492	-1.90658	-0.611346	-2.25255	-1.23571	0.835215	0.308517	0.24965	-0.485777	0.262473	0.425235	1.8255	1.37153	1.38477	1.51167	0.891282	0.221834	0.0464491	-0.280916	-0.322497	0.176829	0.389044	0.30566
3119	opHsV0400004794	opHsV0400004794	-0.503481	-0.0970862	-0.030535	-2.9998	-0.458442	-2.03909	-0.893587	-1.36949	-0.90909	0.516206	-0.156477	0.832811	1.1604	0.915072	0.401103	0.354692	-6.48332e-05	0.338901	0.594901	-0.900069	0.729298	0.66316	0.672207	0.730587	0.952738	0.47176	1.02338
3980	opHsV0400007387	opHsV0400007387	0.0214455	0.117224	1.28122	2.64203	1.91959	2.01001	0.439568	0.127664	0.384153	-0.117415	-0.775829	-0.930645	0.386867	-0.496935	-0.284314	-0.0601274	0.209171	-0.170689	-0.352428	0.0861737	-1.12071	-0.840673	-1.32417	-1.60402	-0.601441	-0.563874	-0.381841
12815	C8orf76	H300013025	0.900887	-0.122451	1.6356	-1.17153	1.54615	1.32938	0.899361	0.530344	0.625791	-1.2862	-1.3384	-2.17374	0.197011	-1.17604	-0.54189	-0.838752	-0.862532	-1.09758	-0.389753	0.554899	1.23509	0.0792774	0.843892	0.0426014	0.273404	-0.0932158	0.398415
4389	opHsV0400007924	opHsV0400007924	-0.650887	0.129279	-0.531349	-2.33182	-2.26468	-1.9061	-0.571901	-0.510938	-0.253345	0.998862	1.68742	1.12331	0.336897	0.985319	0.725078	0.326343	0.140687	0.502401	1.73926	0.27842	-0.119089	0.308479	0.0178917	0.128882	-0.315847	0.035205	-0.0077737
35236	ZNF291	H300020132	2.25467	0.823881	1.1882	1.09384	-0.13918	1.9054	0.32221	0.922223	0.0674433	-0.668526	-0.769144	-1.42282	-0.185462	0.384029	-0.227936	-1.98796	-1.06073	-1.6801	0.243801	0.567808	-0.538806	-0.258341	-0.760954	-0.60932	0.132435	0.335594	0.0677586
26912	PRDX6	H200000039	0.0232515	0.226438	0.103199	2.40943	2.26929	2.41739	0.328814	0.814203	0.433208	-0.223368	-0.551232	-1.14999	0.136842	-0.271605	-0.145258	-0.204107	-0.0360418	-0.0983998	-0.781317	-0.0711551	-1.70566	-0.582057	-0.731157	-0.824681	-0.442769	-0.38792	-0.955352
15087	CYP2S1	H200010876	-1.51938	0.138015	1.36253	0.273992	0.257118	0.872148	-0.172506	-0.105776	-0.165179	-1.37654	-1.79655	-0.516233	-1.95494	-1.39847	-1.35154	-0.0644691	-0.131928	0.100447	0.419058	0.162753	1.52149	0.670822	0.848052	1.03381	0.972536	0.589094	1.33163
30608	SFRS9	H200006425	0.300569	0.476986	0.256944	2.1553	1.97665	1.75741	0.2865	-0.283664	0.321352	-0.0643844	1.47991	0.170414	0.555741	-0.973721	-0.499712	0.537335	0.320619	-0.0923135	-0.20652	-0.912312	-0.847862	-1.52545	-0.948887	-1.15739	-1.12089	-0.637648	-1.32497
10575	AQP7P2	H300001055	-0.71274	0.184371	-1.96176	-1.14749	-0.716867	-2.00028	-1.48204	0.0215791	-0.51399	2.18409	1.20509	0.566026	0.701454	-0.52636	0.765575	1.40367	0.523522	0.940599	0.0551177	0.0527311	-0.941056	-0.285898	0.10904	0.146548	0.625061	-0.13143	0.935432
1629	H300013939	H300013939	-1.23767	-1.18664	-0.57851	0.758373	-0.0965869	-0.27974	-0.915517	-0.336927	-0.799788	1.24988	1.76379	1.66535	1.22696	2.05837	1.46109	0.115049	-0.362221	0.130458	0.493982	-1.03846	-0.925012	0.264045	-0.326005	-0.473926	-1.13576	-0.729583	-0.765019
23256	NKX6-2	H300001096	-1.45132	0.667352	0.181773	-1.21704	-1.52127	-2.51178	-0.883039	-1.80174	-0.380183	0.298307	0.348329	0.239857	1.77383	1.13001	0.510278	1.02116	1.10461	0.345751	0.668099	-0.286567	0.443189	0.533848	-0.145013	0.511872	-0.391161	0.280038	0.53081
31847	SSBP2	H300020311	0.412375	-0.594983	-1.94802	-0.131741	0.317717	-0.548954	-0.601172	0.245064	-0.0897668	1.76494	1.26575	0.0229681	1.40044	1.71484	1.74032	0.397292	-0.383817	1.19646	0.32313	-1.20057	-0.90078	-1.13894	-1.08921	-1.09559	-0.470528	-0.314179	-0.293037
1553	H300012964	H300012964	-0.868373	-1.43578	0.581699	-0.487025	-1.13758	-0.26154	-1.85643	-0.401331	-2.63517	-0.722782	-1.15648	0.0796201	0.400971	0.230257	0.666777	0.338804	0.445941	0.682956	1.73201	0.776582	1.06129	0.689208	0.730326	0.543537	0.741836	0.70839	0.552281
26996	PRMT2	H300020743	-1.98718	-0.433519	-0.64298	-2.27201	-0.885272	-1.79466	-0.678924	-0.53155	-0.0829216	1.18014	0.734386	1.90478	0.0862676	1.41799	0.0840855	-0.0793742	-0.906185	0.296037	0.59131	0.570625	0.879926	0.213627	-0.0398225	0.427141	0.558989	0.49979	0.889292
18154	GPR89_HUMAN	H300020488	1.04004	0.688326	0.0602765	2.68485	2.21258	1.47612	0.536051	0.400267	0.20947	-0.762246	-0.398499	-1.18546	0.376058	0.0192894	0.0105658	-0.783165	-0.607438	-1.17699	0.35989	-0.391576	-0.654696	-1.28024	-0.669797	-1.36348	-0.333363	0.0250575	-0.491892
27184	PSMC3IP	H300019278	0.770266	0.0962501	-0.972436	0.869057	-0.558516	-0.466071	0.170008	-0.0793626	-0.454235	1.00731	1.77246	1.17198	0.695771	0.545501	0.0519566	0.843804	1.02467	1.2434	-1.8455	-2.1469	-0.657381	0.143032	0.617757	-1.65954	-0.455419	-0.870251	-0.857626
32469	TCEAL5	H300003476	-1.30402	0.267591	-0.423385	-2.49529	-2.14229	-2.14761	-0.474504	-0.566575	-0.0117441	0.346671	0.43621	1.48704	0.777459	1.10093	0.604484	-0.154424	-0.10518	-0.255975	1.07094	0.366022	0.507769	0.374348	0.438722	0.686465	0.358483	0.692171	0.565698
12425	C21orf114	opHsV0400005429	0.75947	-0.730465	0.844493	1.20778	1.35966	1.08879	0.283855	0.690617	-0.305349	-1.66599	-1.37412	-1.48344	-1.52731	-0.602254	-1.24	-0.598555	-0.546125	-0.250333	0.962262	-1.60181	1.19412	0.681615	0.650277	0.742164	0.180664	0.574573	0.705403
24326	NP_849153.3	opHsV0400006725	-0.867564	0.347087	-0.764289	-1.7394	-1.87994	-2.10556	-0.752926	-1.04292	-0.243084	0.711283	1.77431	0.533458	0.6764	0.766538	0.56898	0.949769	-0.728648	1.17106	1.65813	-0.117939	-0.517076	0.395129	-0.0175299	0.334519	0.00946894	0.576658	0.304079
10252	ANAPC4	H300019946	1.36577	0.474373	0.667189	2.20906	1.47157	2.04516	0.173137	0.330573	0.573723	-0.475693	-1.79965	-1.87071	0.213424	-0.00899327	0.650413	-0.503815	-0.187293	-0.64724	-0.445916	-1.20602	-0.0375935	-0.369661	-0.067189	-0.878571	-0.844158	-0.400515	-0.431368
32864	TMCC1	H200008351	-0.432298	-0.560798	1.80906	0.623866	0.50001	1.36485	0.436364	-0.112455	0.257431	-0.804298	-0.739033	-2.20704	-1.63868	0.0828812	-1.78694	-0.0657813	-0.594685	-1.51689	-0.249996	1.34619	0.571436	0.830793	0.602029	0.916621	0.162815	0.593958	0.610606
17610	GBA	H200017628	-0.434768	0.213204	0.776952	1.5692	1.71544	1.59004	0.443533	0.319547	0.975737	-1.53163	-1.88154	-1.25863	-1.21959	-1.56032	-0.846919	-0.255553	-0.410062	0.234345	-0.328773	1.58063	-0.641355	-0.0161544	-0.176398	0.0100108	0.531069	0.117651	0.484326
11981	C17orf68	H300014358	-1.21145	-1.59832	-0.276419	-1.76701	0.487369	0.649999	-1.432	-1.45991	-0.905725	-0.481131	-0.386833	-0.200565	-0.418995	-0.149546	-0.475635	0.955621	0.0814006	0.0695552	-0.420647	1.74215	1.68792	0.881262	0.763893	1.23384	0.636037	1.06102	0.934124
29184	RANBP2	H200014845	2.45326	-0.598839	0.892029	1.40753	1.39971	0.279979	0.60549	1.57987	0.775895	-1.48846	-0.900661	-1.72313	0.0510719	-0.459631	0.478104	-1.08362	-0.975163	-0.94656	-0.855768	-0.631322	-0.333052	0.202986	-0.129132	-0.108413	-0.539695	0.513506	0.134026
22948	NCAPD2	opHsV0400006275	-0.0203013	-0.974291	-0.408837	0.391035	-0.320114	0.0277346	0.122398	0.483287	-0.248859	2.05125	2.14253	2.14767	-0.156728	0.0141141	-0.35309	1.07975	0.281665	1.29019	-1.22507	-1.04582	-0.675439	-0.276784	-0.252486	-0.444156	-1.42044	-1.11991	-1.08929
23067	NEDD9	opHsV0400000350	-0.0473087	-0.821253	-0.811363	-0.766814	-1.90568	-1.56925	-1.15047	-0.805903	-1.30197	2.43944	0.0302166	0.998382	1.36552	1.3155	0.822851	-0.349459	-0.463054	-0.209613	0.4803	1.2541	0.406178	0.517752	-0.0249153	-0.234572	0.0912644	0.633694	0.106414
2865	opHsV0400003922	opHsV0400003922	-1.08383	0.0195701	-0.166251	-0.36648	-0.900628	0.0129517	0.47718	0.386375	-0.333888	1.18165	1.13602	0.852452	1.25511	0.645531	1.10894	1.62012	0.163597	0.90046	-0.665173	-1.28664	-0.0913643	-0.577938	-0.456169	0.105987	-0.380252	-3.21639	-0.340938
31031	SLC27A4	H300021101	-0.355309	-0.147838	0.138807	-2.60058	-1.74615	-1.76028	-0.423675	-1.27957	-0.643806	-0.72194	0.54589	0.847579	-0.455081	-0.0111507	0.196751	0.130583	0.732286	0.546817	1.6315	0.988439	0.549852	0.141636	0.00462553	0.482133	1.1001	0.591384	1.51699
18987	HRAS	H300021681	-0.632823	0.502077	-1.69109	-2.38201	-2.65975	0.0313276	-0.678155	-1.25351	-0.520431	-0.47084	0.698495	0.792024	0.814853	0.432001	0.780659	0.226096	0.452403	0.264684	1.1143	0.450375	0.0520032	0.800914	0.78826	1.06512	0.58656	0.0959407	0.340508
17666	GDAP1L1	H300019701	-1.0023	1.03796	-0.796657	-1.66482	-1.37171	-1.86135	-0.283308	-0.885168	-0.128466	1.53105	1.68623	1.74118	1.19097	1.01412	0.500402	0.468752	0.187728	0.523482	1.10446	-0.360794	-0.782163	-0.0255804	-0.453583	-0.566237	-0.044164	-0.553537	-0.20648
16939	FBXL7	opHsV0400001863	-0.833648	1.70031	-0.671237	-1.00888	-1.22979	-1.39514	-0.367014	-1.33542	-0.914009	0.58469	1.52337	0.848771	0.666047	2.11474	0.421029	0.709871	0.983335	1.30635	0.395383	-0.109094	0.240845	0.0590056	-0.763004	-0.955419	-0.479145	-0.825718	-0.666234
35033	ZG16_HUMAN	H300001607	-1.32556	-1.14927	-0.119222	-1.00815	-1.12659	-0.545523	-0.796232	-1.06979	-0.629698	1.19622	1.28298	1.70332	1.61133	2.08347	1.36721	-0.145463	-0.671835	-0.0920997	1.17832	-0.420328	0.56077	-0.208415	0.105503	-0.498281	-0.379513	-0.178042	-0.72511
2579	opHsV0400002882	opHsV0400002882	-0.167956	0.328886	0.618033	2.72039	2.49604	2.30657	0.475144	0.471869	0.0495317	-0.329891	-0.470636	-0.346682	0.0197613	-0.738853	-0.672314	-0.537793	-0.455375	-0.624342	-0.162157	-0.931249	-0.693388	-1.13259	-0.470594	-0.705305	-0.337381	-0.316462	-0.393253
8929	opHsV0400013214	opHsV0400013214	-0.764904	-0.827719	0.438441	-2.87642	-0.41395	-0.673936	-0.666557	-0.828409	-1.99158	-0.355019	0.942243	-0.0479688	0.812768	-0.226794	0.846772	-0.671344	0.0321452	-0.121555	0.184834	1.1261	1.23198	0.495676	0.271996	0.722342	1.48443	0.983338	0.893091
27728	Q6P095_HUMAN	opHsV0400008377	0.389625	0.900298	-0.254719	1.20488	1.43062	0.430209	-0.0100947	-0.104963	-0.201823	0.0303191	1.22551	0.193049	1.79673	1.35098	1.31536	-0.0660383	-0.717572	0.352104	-1.22753	-0.755386	-2.03313	-0.817742	-1.73032	-0.951784	-0.986202	-0.0437614	-0.718616
24155	NP_653327.1	opHsV0400006584	-0.232449	0.744152	1.26317	1.12198	2.75152	1.05317	0.316105	0.685994	0.279033	-1.00999	0.13127	-1.4546	-0.908889	-1.36044	-0.971035	-0.665427	-0.486402	-1.42518	-0.255924	-0.194124	-1.42259	0.230203	0.657248	0.225599	-0.174831	1.01211	0.0903279
17829	GLPK3_HUMAN	H300006273	0.706413	0.139257	1.40784	2.07004	0.213688	1.33494	0.629384	0.898166	0.518773	-0.726526	-0.636504	-1.19642	-0.556263	-0.617807	-0.619377	-1.55215	-1.27595	-1.02869	2.21141	-1.28214	0.0781562	-0.417302	0.128394	0.523414	-0.290448	-0.521205	-0.139085
27531	Q4KMP3_HUMAN	H300020880	-0.92849	-0.552044	-2.84857	-0.942321	-0.398159	-0.679527	-0.469218	-0.895761	-0.59396	1.58065	2.10316	1.8028	0.600703	0.321845	1.16325	0.113199	-0.217063	0.336015	-0.675395	-0.520808	-0.133241	0.724319	0.452325	0.326787	0.298374	0.0492202	-0.0180985
16700	FAM20B	H200001098	2.87144	1.0087	0.0610264	1.43996	0.534592	0.652977	1.03498	1.01906	0.322661	0.308059	0.0192637	-0.304166	-0.0739386	-0.103964	0.135719	-0.993036	-0.538159	-0.668505	0.0428801	0.35325	0.00856615	-1.55227	-1.66903	-1.66663	-0.77923	-0.804159	-0.660039
19280	ID3	H200006334	-0.0857449	0.0160955	-0.234641	-1.73992	-1.47795	-2.60753	-0.623672	-1.70862	-0.292992	0.0566076	0.33916	1.02503	1.82452	1.81825	0.597995	0.555839	0.278664	0.640239	0.310586	-0.326981	-0.160795	-0.437993	0.164687	0.412267	0.692063	0.559045	0.405792
30350	SDF2	H200012139	0.635501	0.281362	0.431649	2.40212	1.85959	2.38036	0.140204	0.512698	0.470093	-0.433442	-1.34629	-1.37442	-0.243991	-0.315334	-0.0823448	-0.840828	-0.903007	-0.695354	-0.59929	1.23317	-0.803983	-0.495102	-0.701007	-0.520846	-0.306406	-0.27512	-0.409981
13229	CCDC100	H300021326	1.89689	0.555242	0.256966	-0.340937	1.85669	2.33695	0.272834	0.533994	0.220661	-0.745648	-0.766717	-1.85159	-1.02395	-0.195028	-0.356323	-1.66677	-0.738487	-1.13125	0.391189	-1.20736	0.0961663	0.100302	0.346641	0.569219	0.100238	0.222306	0.267778
19803	ITGAE	H300019770	1.07678	0.784483	0.691635	2.12811	1.4345	2.04786	-0.0151979	0.518425	0.59426	-0.316106	-1.37842	-0.915189	0.428755	-0.729988	0.173306	-0.272845	-0.176949	-0.554901	-0.732751	1.2465	-1.20775	-1.31366	-1.11867	-1.13776	-0.400365	-0.413805	-0.440258
7408	opHsV0400011560	opHsV0400011560	1.33174	0.459437	2.2683	1.3168	1.56204	0.823439	0.262536	0.963916	0.205888	0.402027	0.149177	-0.11445	0.294026	-0.612726	-0.275157	-1.13871	-0.610036	-1.37593	-1.44426	1.24324	-0.558596	-0.719603	-0.426874	-1.12568	-0.996813	-0.906256	-0.977483
6155	opHsV0400010087	opHsV0400010087	-0.911446	-0.223677	0.88608	-0.301377	-1.21612	-1.14988	-0.156441	0.220557	0.178427	1.22183	1.85031	1.94931	1.18992	0.824502	1.67169	0.679732	-0.268497	-0.0507219	-0.76537	0.220129	-0.549887	-0.613301	-1.48242	-1.63108	-0.653216	-0.164461	-0.75459
15529	DLG3	H300011440	0.560472	-0.591733	-2.57334	-0.497837	-1.26267	-0.446286	-0.465251	-0.548149	0.221917	0.494599	1.73474	1.65514	0.279431	0.384105	0.887876	1.01634	1.40849	1.38965	-0.785629	-1.44898	-0.779289	0.494639	0.136639	-0.154941	-0.0780383	-0.537829	-0.494059
3806	opHsV0400007145	opHsV0400007145	1.02089	0.714417	0.754891	3.93393	0.901513	0.206348	0.619089	0.391769	0.33418	-1.06276	-0.429429	-1.04308	-0.741244	-0.666826	-0.381481	-0.946813	-0.604243	-1.01896	0.0764162	-0.541451	-0.127245	-0.47397	-0.394408	-0.576842	0.000807223	0.143422	-0.0889267
30026	RSPO2	H300008245	-1.7011	0.798719	-0.771652	-1.62566	-2.42153	-1.53187	-0.876737	-0.107176	-0.966409	1.43299	1.05266	0.577951	0.161902	0.227909	0.211342	1.22519	0.415057	0.565434	-0.0750115	-0.610908	0.965662	0.245984	0.480425	0.348397	0.594447	0.11799	1.26599
13245	CCDC109A	H200000949	0.687175	-0.182982	1.01447	1.62489	1.44751	1.22425	0.436407	0.640009	0.685852	-0.502068	-1.74826	-2.17455	-1.52205	-1.65418	-1.14738	0.133476	0.365781	-0.237838	-1.28648	0.495194	0.408303	-0.0637642	0.525304	0.102914	0.211567	0.328591	0.187858
19339	IFNGR1	H200008474	-0.669507	0.220557	1.62048	1.14068	1.39659	0.95544	0.372854	0.551068	0.350903	-1.52447	-2.21693	-1.60037	-0.984734	-1.33432	-1.13586	-0.0939375	-0.0590946	-0.240084	0.372454	1.65668	0.18123	-0.646615	-0.023685	0.12017	0.700048	0.465273	0.42518
22381	MPP8_HUMAN	H300018688	0.650246	0.591492	0.131868	1.85382	1.93495	1.29344	0.473232	1.09141	0.65005	-1.37042	-0.881955	-1.43096	-0.255028	-0.0527119	0.284874	-1.70267	-0.943362	-0.943578	-1.88964	-0.894531	0.23571	-0.243598	0.395817	0.21647	0.115737	0.192446	0.496892
23674	NP_001025170.1	H300021548	-0.829508	0.271181	-0.364838	-1.78994	-1.05523	-1.55297	-0.590535	-1.09233	-0.323163	1.03963	2.12489	1.96547	1.25601	1.24944	1.13935	0.0859702	-0.230527	0.0218824	1.04956	-0.0173528	-0.667277	-0.826767	-0.27752	-0.51684	-0.274611	0.328325	-0.122303
35733	ZNFX1	H200014878	-0.727542	-0.166191	-0.115804	1.48136	1.04649	1.63023	0.941488	1.04644	1.18906	-0.629967	-1.47806	-2.24219	-0.49107	-1.34437	-0.271416	-0.871603	-0.900188	-0.862308	-0.873936	0.726274	0.363897	0.045189	0.157273	-0.32675	0.98156	0.633787	1.05834
7589	opHsV0400011756	opHsV0400011756	0.262963	-0.874762	-0.763999	-1.57473	-0.686791	-1.64632	-0.3808	0.510236	-0.151461	0.516458	-0.342977	-0.0710895	-0.788925	-0.27859	-0.840814	-0.422901	-1.08872	-0.667407	0.122323	0.872282	0.366295	0.0794657	1.08482	0.937843	1.32042	2.17544	2.33175
18699	HIST1H2AK	opHsV0400001950	0.112009	0.450267	-0.730772	-0.743988	-1.35957	-1.47686	-1.0257	-1.45226	-1.22395	1.29658	1.28975	1.6554	0.719059	-0.237389	0.381177	1.05316	1.04501	1.37423	1.45574	-1.28718	0.0369222	0.595088	-0.704747	-0.0710883	-0.22523	-0.499602	-0.426075
10961	ATP2A2	H300015117	0.208209	-0.219894	1.2328	2.3099	1.9531	2.25856	0.353853	0.612861	0.575198	-0.503564	-0.679888	-1.0157	-0.539394	-1.75783	-0.409004	-0.04092	-0.199202	-0.219242	-0.902222	0.870232	-0.617889	-0.263872	-0.553218	-0.465956	-0.575909	-0.551584	-0.859436
26416	PLEKHM1	H300021103	0.270267	0.850759	2.35886	0.0448223	0.584716	-0.27167	1.02085	0.100245	0.352488	-1.04297	-0.642728	-0.818718	-0.398808	-1.60267	-0.708548	-1.52772	-0.432209	-2.11582	1.75525	0.651801	1.33166	0.0382482	0.349384	0.122937	0.0503649	0.135287	-0.45607
15019	CYB5B	H300019606	0.0880815	0.361393	0.221511	1.90863	2.18876	3.266	0.33677	0.415876	0.430425	-0.070493	-0.277411	-0.347493	-0.144454	-0.393445	-0.394032	-0.664759	-0.348868	-0.761167	-0.249102	-0.355871	-1.34721	-0.720158	-0.622174	-0.726745	-0.589151	-0.438986	-0.765938
18729	HIST1H4A	opHsV0400005297	0.0338486	-1.81812	-0.455693	-2.94016	-1.30263	-1.93874	0.0253056	-0.882447	0.156153	0.175584	1.1436	0.582704	0.370784	0.516525	0.599712	0.744562	0.902138	1.19026	0.168333	-0.601691	0.307099	0.931194	0.523577	0.358441	0.642635	0.3987	0.168333
22627	MTMR6	H200006724	0.580973	0.117921	1.3006	0.865311	1.95905	2.31912	0.283867	0.584792	0.500153	-0.677373	-1.00829	-1.56297	-0.452221	-0.762738	-0.538738	-0.729516	-0.701165	-1.11712	0.609824	1.74376	0.360767	-0.387305	-0.473421	-0.890841	-0.666854	-0.397711	-0.859873
11249	BCCIP	H300013566	2.00637	0.691494	0.192251	0.942734	1.56685	1.00269	1.19221	0.973952	0.684171	-0.845845	-0.805817	-2.14603	0.3081	-0.135907	0.124438	-0.799539	-0.200443	-1.11543	0.63578	-1.19943	0.294944	-0.370983	0.642285	-0.526296	-0.953733	-0.724034	-1.43478
25149	OR2W5	opHsV0400006007	-0.895011	0.993448	-0.338043	-0.874328	-1.24465	-0.57789	-0.993986	-0.579216	-0.819187	1.52816	1.65707	1.92689	1.58256	1.62269	1.01252	0.182819	-0.115314	-0.107607	0.826339	-0.336585	-0.704692	-1.35303	-0.631957	-0.6904	-0.487772	-0.420406	-0.162417
26211	PIK3R4	H200006999	0.337842	-0.18006	0.640373	2.52017	1.39767	1.76075	0.341664	1.26917	0.405073	-1.47102	-1.42547	-1.37961	-0.697471	-1.01702	-0.491168	-0.404939	-0.160223	-0.531832	0.320606	-0.885678	-0.513299	-0.700537	-0.570312	-0.60238	0.468172	0.65705	0.912477
30429	SEMA4F	H300016284	-0.712113	0.241629	-0.00230696	-1.90958	-1.13858	-1.59342	-0.864825	-0.706832	-0.280507	1.81272	1.15974	1.79126	1.76611	1.49788	1.34054	-0.183418	-0.548996	0.21395	-0.0834135	-0.355154	-0.710569	-0.536812	-0.239133	0.0086803	-0.31342	-0.0553528	0.40192
20781	LANCL3	H300002606	1.12069	1.14234	-0.990505	0.300444	0.523222	0.599314	-0.0486745	0.961229	-0.59773	1.07094	0.848383	0.893781	-0.394189	1.02595	0.648165	0.462644	0.783479	0.798084	-1.06652	0.788931	-1.83045	-0.841525	-1.91984	-1.2807	-0.454754	-1.03822	-1.5045
35580	ZNF646	opHsV0400005113	-0.480272	0.368127	0.0561362	-1.02368	-1.14725	-1.83184	-1.04802	-0.78829	-3.33574	0.499057	0.35742	0.261268	0.473233	0.229649	0.0562945	0.541229	0.426564	0.630693	0.379271	-0.267107	0.430036	1.01936	0.557915	1.27646	1.05146	0.904587	0.403436
25033	OR10H2	H200015878	-0.25429	0.233304	1.15938	0.0555303	-0.272286	0.163933	0.424393	0.559763	1.13527	-1.82755	-1.93138	-1.87823	-2.02506	-0.929633	-1.28717	0.358882	0.378824	-0.0443601	0.680508	0.587535	0.783725	0.185862	0.0930293	1.24336	0.51762	0.729449	1.15958
8702	opHsV0400012971	opHsV0400012971	-0.269841	-0.253549	0.565757	0.329666	0.884604	0.359587	0.816971	0.733848	0.428464	-1.57267	-1.8214	-1.24015	-1.57117	-2.08212	-1.5476	-0.122285	0.675427	0.0333093	-0.447171	0.768947	0.240368	0.910172	1.40332	1.21323	0.722044	0.158283	0.683958
20872	LCORL	opHsV0400001387	1.93916	0.390827	1.2631	0.0716297	0.727717	-0.236455	-0.265144	1.3233	-0.399794	0.824433	1.255	0.522374	-0.198057	0.206254	-0.0586554	0.768755	0.432547	0.756264	-0.97997	-2.18094	-0.657094	-0.385939	-0.0588229	-0.621465	-1.80835	-0.79608	-1.83458
20409	KIF5C	opHsV0400008342	-1.32569	0.051836	-0.700926	-1.64256	-1.38782	-3.09206	-0.660148	-0.327391	0.191098	1.1281	0.425107	1.00679	0.298069	1.35225	-0.00733789	0.877978	1.02271	0.775645	1.18333	-0.619434	0.30906	0.255858	0.359318	0.1174	0.14549	-0.00559973	0.268913
20330	KIAA1751	H300005799	-0.153912	0.333108	-0.0767378	-2.50899	-2.365	-1.61538	-0.317662	-1.04511	-0.207051	1.18818	0.89121	0.801647	1.1773	1.195	0.767986	0.901155	0.919065	0.350833	0.803609	0.82704	-0.053374	-0.185137	-0.47031	-0.599071	-0.111337	-0.35399	-0.0930843
14183	CLGN	H200007192	1.60889	1.17955	-0.577049	0.492938	0.350876	0.403705	0.783376	0.194427	0.810407	-1.29992	-0.854029	-1.22675	0.189244	-0.196482	-2.08165	-1.63426	-1.18751	-1.00998	0.552884	-1.05104	0.209391	0.960596	1.096	1.18934	-0.227742	1.15986	0.164936
26988	PRLR	H300022890	-0.57822	0.603613	-0.0334634	-0.356069	-0.0362603	-0.773467	-0.525711	-0.22846	-0.291338	1.68714	1.32429	2.49051	0.110965	0.453083	0.425696	0.812421	0.795161	0.855925	0.631981	-0.146089	-1.46417	-1.57519	-1.30993	-1.88235	-0.769528	-0.189105	-0.0314253
26157	PIAS2	H300019655	-0.466923	0.94243	0.899008	2.13253	2.44082	0.896215	0.427137	1.48704	0.565373	0.0296992	-0.742393	-1.12991	-0.840005	-0.140163	0.149622	-0.488844	-0.619185	-1.11884	-1.42992	-1.02059	0.498197	-1.20473	-0.581316	-0.674064	-0.0164974	0.134539	-0.129245
11476	BRPF3	H300015725	0.259869	-0.639693	-0.584357	-1.49407	-0.440191	0.483044	-2.62625	-2.16649	-1.59925	-0.206883	-0.0843312	0.325316	0.36499	-0.346241	0.454693	0.358616	0.799064	0.0782417	0.00268016	1.08291	1.16329	0.798693	1.37476	0.580882	0.46138	0.573728	1.0256
34458	VWF	H300010601	-0.858628	0.0224306	-1.36259	-1.13106	-1.67751	-1.38034	-1.17968	-0.957614	-0.704118	0.998975	1.25878	1.63863	0.491643	1.53557	0.846652	-0.202854	-0.572891	-0.208103	1.65097	-1.18746	0.581403	0.0897843	0.352246	0.460024	0.439143	0.392047	0.664536
25823	PDC	H300011132	-0.477467	-0.0256747	-0.98553	-0.17775	1.2642	0.854962	0.770619	0.365893	0.213293	-0.0339062	0.088246	-0.143986	0.554728	0.208071	0.750068	2.14993	1.30425	2.1472	-1.32774	-0.749026	-0.72463	-0.181084	-1.32017	-1.22323	-1.22813	-1.11039	-0.962756
3034	opHsV0400004558	opHsV0400004558	1.1938	0.241279	1.21098	0.954272	0.853387	0.995038	0.045467	2.25708	-0.281273	-0.175893	0.29641	-0.00320123	0.126672	-0.602937	0.568686	0.491494	0.478313	-0.076636	-0.132669	-1.17218	0.126159	-0.48255	-0.438604	-1.0657	-0.899785	-2.18231	-2.3253
5140	opHsV0400008867	opHsV0400008867	0.371128	-0.455092	0.915733	1.82264	2.56849	1.26804	0.849029	0.975923	0.574755	-0.74957	-1.15478	-0.941258	-0.66292	-0.716605	0.473235	-1.33601	-0.854539	-0.948696	0.179389	-1.59289	0.235153	0.0299883	-0.479547	-0.868559	0.413267	0.294938	-0.211245
19740	IRF4	opHsV0400004447	-0.593468	-0.828393	-0.645113	-1.24814	-2.21232	-1.93212	-0.37	1.21312	-0.724411	1.26803	1.56868	1.33517	0.541706	0.491138	1.04496	0.284508	0.710288	1.41096	-0.393512	0.529449	-1.0509	0.499503	-0.0453096	-0.530895	-0.284056	0.0758505	-0.114732
24535	NPFFR1	H200018016	-0.563907	-0.098686	-0.192221	-2.50163	-2.18172	-1.94009	-0.340772	-0.424038	-0.217253	1.00713	1.01053	0.531542	1.69194	1.74696	1.11745	-0.0103985	0.173966	0.364669	0.857413	0.114969	-0.322577	0.0122848	0.000919122	0.0208918	0.0364154	0.105962	0.000247629
23001	NDST1	opHsV0400000287	0.223837	-1.40405	-1.02122	-0.659474	-0.261473	0.340942	-2.17025	-1.80452	-2.11121	0.883755	0.618522	0.934339	-0.289123	0.404817	-0.694372	0.11418	0.100986	-0.148406	0.140321	1.52341	1.02806	0.78069	0.946442	1.15664	0.678718	0.0767083	0.611725
17962	GOLGA4	H300020287	1.91501	0.952099	-0.178925	1.46151	1.85804	1.34273	0.862847	0.888505	0.156724	-0.817871	-0.698954	-1.19787	-0.194061	0.0282951	0.800911	-1.44947	-1.21436	-0.875532	0.318591	0.963486	-0.437015	-0.961916	-1.03033	-0.82091	-0.602154	-0.450804	-0.618577
22712	MYADML	opHsV0400001249	-0.845611	-0.187244	-1.26836	-1.55035	0.079168	-2.46814	-1.27817	-1.37706	-0.429692	1.13241	1.01304	0.451585	1.1043	0.682615	0.850675	0.238946	-0.282162	-0.311996	1.0585	-0.0454068	-0.357461	0.662577	0.325858	2.05004	0.462915	0.231266	0.0577528
35710	ZNF800	H300003273	0.723309	0.0775061	0.928207	1.81608	2.59636	0.825873	-0.102039	0.601287	0.0271298	-1.30421	-0.84522	-1.55607	-0.158435	-0.939091	0.221026	-1.35949	-1.04683	-1.57041	-0.0268844	-1.10754	0.780817	0.428838	0.284783	-0.0569623	0.301621	0.301588	0.158759
34524	WDR26	H200009472	0.519643	0.208425	0.951476	1.84254	1.70175	1.70365	0.700009	0.648202	0.680116	-1.77792	-1.05502	-1.75052	-1.14444	-1.35689	-0.844304	0.288338	0.31215	0.586736	-0.232837	0.22069	0.206681	-1.04238	-0.629104	-0.902793	0.046229	-0.0742198	0.193803
11996	C17orf81	H200006340	-1.46477	0.0399648	-0.217281	-1.39401	-1.80117	-2.43309	-0.504874	-0.775328	-0.309775	0.73071	0.998941	1.71275	0.863321	2.18542	0.753821	0.00846257	0.0585992	-0.351704	0.538188	0.53114	0.369676	0.268607	0.222433	0.351931	-0.153801	0.0598716	-0.288023
13038	CALR	H300004750	0.416371	0.159173	-1.15248	-1.70694	-0.786809	-1.67822	-1.3238	-1.65544	-0.543567	0.0910946	1.27082	1.6026	0.140547	-0.0085085	-0.110838	1.32868	1.9751	1.5844	0.28843	0.464018	-0.268016	-0.14014	0.216762	0.246726	0.216525	-0.624825	-0.00165962
30883	SLC16A2	H200006070	-0.302982	-0.227855	-1.7395	-0.39159	0.99338	0.538014	0.881785	0.680143	0.934726	-0.316348	-0.214465	0.0592035	-1.83059	-1.60884	-1.5579	-1.0527	-1.19556	-0.959208	-0.03081	0.652834	0.712893	0.786482	1.38659	1.15401	0.619465	1.19218	0.836644
29821	RPL18A	H300006101	0.193322	0.213076	-2.42078	-0.597481	-0.401042	0.238149	-1.70881	-2.15764	-1.56947	0.528762	1.17327	1.72835	1.44833	0.802614	0.468413	0.426748	0.849731	0.517363	0.304171	-0.187708	-0.19146	0.280893	0.248675	0.373188	0.0923403	-0.351807	-0.301199
15852	DUOXA1	H300014138	-1.13648	-0.407355	-2.59623	-1.01285	-0.959037	-0.104185	0.171975	0.448756	0.329001	1.64595	1.14661	-0.08417	1.0459	1.43956	1.14074	1.14395	0.54685	1.27842	-0.130917	-0.0604016	-1.52787	0.232167	-0.563908	-0.669427	-0.353429	-0.4549	-0.508714
30592	SFRS15	H300010950	0.694726	1.1768	0.531219	2.81368	1.8331	1.95899	0.0678456	0.0779869	0.138196	-0.620408	0.195345	-0.661048	0.0326442	-0.75651	-0.464606	-0.660099	-1.57039	-0.874158	-0.669399	-0.987544	-0.494895	-0.724068	0.278634	-1.03929	-0.170767	-0.105324	-0.000671853
15791	DRD4	H200011020	-1.06427	-0.162531	-0.748754	-1.17458	-0.80113	-1.90401	-0.671629	-0.720154	-0.34449	1.32414	1.70546	2.75345	0.323861	2.04128	0.433454	-0.069245	-0.093421	0.0755097	0.0281507	-0.11394	-0.207064	0.0625968	-0.181196	0.0619206	-0.0763497	-0.789037	0.311973
14131	CLDN12	H200016459	2.33635	1.72055	0.431156	0.99819	1.06712	0.91022	0.930869	0.70131	0.233252	-0.723051	-0.637492	-0.27808	-0.0877807	0.000761949	-0.26488	-0.988047	-0.970513	-0.89023	-1.32637	1.71148	-0.285322	-0.0220321	-0.776633	-0.870881	-1.21015	-0.567001	-1.14279
34756	XRCC6	opHsV0400004009	1.08656	0.125806	-0.0313251	2.65246	2.43137	1.93674	0.3457	0.37326	0.263917	-0.769605	-0.500711	-0.919992	0.279885	0.0883828	-0.042766	-0.345418	-0.170406	-0.783646	-0.0687088	-0.948279	-0.691334	-0.808168	-0.925132	-1.30158	-0.409254	-0.202332	-0.665421
29792	RPE	H300016426	1.71286	0.452952	0.0103845	1.42665	2.00897	0.871029	0.368202	1.07815	-0.0054853	-1.49438	-0.37478	-1.22479	0.48045	0.410617	0.515953	1.0918	0.488431	0.413301	-1.25232	-1.37646	-1.21216	-0.919001	-0.367409	-0.873466	-0.582134	-0.490933	-1.15644
33863	TXNL2	opHsV0400000086	0.56089	0.887704	0.929795	2.12503	1.84927	1.83259	0.428414	-0.0311978	0.302173	-0.781165	-0.848759	-0.251076	-0.0322654	-0.613352	-0.106334	0.130584	0.416789	0.11597	-2.65763	0.198749	-0.574598	-0.995608	-1.05639	-0.475266	-0.260698	-0.696822	-0.396788
29418	RELN	H300020346	0.462296	0.579931	-0.956256	-0.560273	-1.14119	-1.11451	-0.727371	-0.410685	-0.260059	1.8334	2.00307	1.89899	1.54218	1.45288	-0.624326	0.382561	0.0911928	0.732899	0.358424	-0.632649	-0.955862	-0.404874	-0.906489	-1.01688	-0.47696	-0.649214	-0.500225
7333	opHsV0400011477	opHsV0400011477	-0.0567686	-2.32802	0.46667	-1.19136	-0.780365	-1.58772	-1.71231	-0.202294	-1.05079	1.39046	0.789273	0.653785	1.28623	0.377419	1.16622	0.503352	0.769298	0.730019	-0.717578	-1.13979	0.0160838	-0.094305	0.0942653	0.0887089	0.620883	0.665015	1.24362
21618	LYSMD3	H200013205	2.98481	0.264635	-0.113123	1.56599	1.46715	1.54153	0.564282	0.782647	0.159573	-1.02497	-0.750571	-0.625917	-0.625779	0.0146276	-0.171799	-0.30004	-0.00984993	0.154183	-0.457518	-1.8938	-0.293752	0.19299	-0.871445	-1.01333	-0.550403	-0.370956	-0.619174
11810	C14orf122	H200016750	-0.839353	0.886761	-1.00848	-2.3712	-1.53978	-0.443851	-1.06829	-2.09534	-0.706012	0.660973	-0.164136	1.34287	0.0360951	0.398451	-0.0195184	0.364463	0.169338	0.370295	0.81988	-0.730725	0.429515	1.0413	1.13346	0.830231	0.849224	0.888239	0.765593
20894	LDLRAD2	opHsV0400008333	-0.631107	0.219	-1.17162	-1.69464	-2.24094	-2.72325	-0.286742	0.111353	0.000355824	0.658072	1.34708	1.08583	0.761301	1.49546	1.2613	0.264994	0.473038	0.353988	0.445486	-0.212883	0.0726162	-0.0645066	-0.260451	0.0820759	0.276918	0.343865	0.0334227
12563	C3orf59	opHsV0400006717	-1.30611	0.540152	-0.273072	-2.09118	-1.57396	-1.97673	-0.76831	-0.583143	-1.13211	1.43728	0.680693	1.19346	0.13971	-0.73625	-0.00417033	0.156067	-0.491705	0.67198	0.233175	1.35351	0.299895	0.753552	1.19668	0.18865	0.68016	0.349379	1.06239
14953	CXCL16	H200006939	0.273369	0.151584	2.40611	1.58608	1.44871	1.30453	0.324993	-0.363733	0.359468	-1.41759	-1.25696	-0.760144	-1.0873	-1.69627	-1.12859	-0.144785	-0.470648	-0.606595	0.275706	1.57862	0.449806	-0.317208	-0.391838	-0.335846	0.265678	-0.296667	-0.150485
20392	KIF23	H200016720	1.38095	0.358471	-0.48036	1.3233	0.228991	-0.788284	1.17485	1.43118	0.488729	0.154634	1.00489	0.415138	-0.320301	-0.0756861	-0.370344	1.12518	0.996745	1.27174	-0.769891	-2.35792	-0.932067	-0.514527	-0.48812	-0.7063	-1.41574	-1.01309	-1.12216
9024	opHsV0400013415	opHsV0400013415	-1.41453	-1.51183	-1.9383	0.848877	-0.345464	-1.60839	0.180065	-0.9714	-0.400661	1.7997	0.261278	0.86981	0.724149	1.52762	1.11933	0.908044	0.779477	0.777147	-1.12116	0.0488692	-0.896952	-0.50246	-0.527579	0.40712	0.574022	0.14772	0.265503
10499	APH1A	H300013509	-0.247749	0.0669285	-0.316151	-2.45808	-1.78664	-1.52462	-1.15976	-1.39617	-0.487681	-0.288225	0.507464	1.21042	0.818877	0.510882	0.0832052	0.612455	0.820379	0.973728	-0.286904	-0.179741	0.409877	0.475169	1.95707	0.583702	0.887894	-0.399349	0.613023
25797	PCSK4	H300011029	-2.17396	0.33115	-1.34071	-1.15261	-0.773823	-0.280695	-1.49999	-1.07232	-0.752455	1.41454	1.54001	1.29931	0.364911	2.0799	1.07656	0.467652	-0.497842	-0.490504	-0.244345	0.607363	0.152747	0.569909	0.131746	0.316034	0.14883	-0.295061	0.073628
29826	RPL22L1	H300001508	2.05927	0.0180248	-0.859571	1.48988	1.22218	0.934188	1.93089	1.59751	0.942511	-0.491673	-0.404537	-1.18697	-0.0503882	0.12826	-0.579902	-0.640972	-0.584175	-0.937549	-0.425102	-0.709617	0.00998749	0.0433186	0.205893	-0.129046	-1.41635	-0.654437	-1.51163
17954	GNS	H300003699	-0.817163	0.148816	1.34318	1.94697	1.9637	1.94433	0.198211	0.237225	0.597724	-0.791848	-0.964076	-1.5556	-1.06817	-1.54804	-0.642852	-0.567368	-0.663762	-0.719601	0.291576	1.23636	-0.29321	-0.233322	-0.505077	-0.365799	0.336082	0.101214	0.3905
20786	LAPTM4B	H200009681	-0.605017	0.0396775	-1.81217	0.389084	0.577345	0.207648	-0.261787	0.462259	-0.166831	0.803807	1.731	1.25246	0.933688	1.57366	0.614609	0.521015	0.386585	0.789453	-0.492271	-2.74972	-1.47773	-0.136728	-0.526058	-0.380012	-0.803171	-0.237555	-0.633246
25501	P4HA1	H200006322	1.31386	0.0410872	-1.00823	1.91499	0.316458	0.994119	0.613741	0.748082	0.283576	-0.213404	0.428078	0.0342224	1.05637	1.35959	0.452688	0.337813	0.17262	0.467813	-1.46791	0.0795308	-2.10733	0.0969326	-1.41895	-1.13386	-1.14551	-1.25392	-0.962446
3240	opHsV0400005106	opHsV0400005106	-0.101403	-0.892355	1.71856	1.30278	0.743884	0.701592	-0.983944	0.0587781	-0.867931	0.579565	1.64296	1.58027	0.331252	1.49975	0.374722	0.263823	0.344332	0.496872	-0.792242	-0.512422	-1.2929	-0.793668	-1.14978	-0.812916	-1.43859	-0.828366	-1.17262
32088	SUGT1	H200001007	2.8279	0.766026	0.639659	1.32196	0.869114	1.33881	0.590906	0.184397	0.777151	-0.340984	0.333582	-1.13435	0.421747	-0.0570178	0.208154	-1.56917	-0.843178	-1.1395	-0.75125	0.584959	-0.452332	-1.22274	-0.627285	-1.27534	-0.647629	-0.132007	-0.671567
29958	RPS6KB1	opHsV0400004224	1.9281	-0.126255	1.12211	1.02662	1.34726	0.24831	-0.233903	1.9583	0.4812	1.16982	-0.0231602	-1.14743	0.171495	0.73845	1.08893	-0.436694	-0.724018	-0.206439	-0.965467	-0.697986	-1.69143	-1.17005	-0.968488	-0.906115	-0.769661	-0.693026	-0.520471
20071	KCNQ2	H300016569	-0.0635072	-0.207053	-0.775557	-1.78697	-2.49922	-2.85699	0.28014	-0.806281	-0.278425	0.393127	-0.112641	0.288112	0.208569	0.245032	0.144413	0.643279	0.400071	0.115748	0.124387	1.04569	0.974502	1.09575	0.368275	0.672357	0.481426	0.744131	1.16164
10595	ARFGEF1	H200010654	1.19691	0.406171	1.20962	1.96452	2.0436	1.12712	-0.325144	-0.0471888	0.523354	-1.47884	-1.15901	-1.93602	-0.257051	-0.238415	-0.0640724	-1.19235	-0.80942	-0.938856	0.313186	0.34185	0.385838	-1.06074	-0.551149	-0.607414	0.128343	0.815835	0.209324
13863	CEP70	H200004567	2.71711	1.29174	1.1473	1.43704	1.76669	1.20023	-0.105609	-0.264545	0.145849	0.184633	-0.0396618	0.115687	-0.28393	-1.41445	-0.942944	-0.953608	-0.464299	-1.02727	-0.0146687	-1.35409	0.0218808	-0.28149	-0.408796	-0.395394	-0.697756	-0.571664	-0.807982
21350	LOXHD1	opHsV0400004863	-1.58297	-0.721862	-0.670624	-0.980891	-1.17567	-1.12066	-0.735027	-0.727873	-0.391465	0.605462	0.961326	1.67824	1.51668	2.26573	1.33198	-0.0369485	-0.351731	0.095668	1.57591	-0.714221	-0.076021	0.080956	-0.0409213	-0.398473	-0.0765884	0.562671	-0.872669
33904	U384_HUMAN	H200017551	-0.994753	-0.787928	-1.10287	-1.35736	-0.743014	-1.42349	-0.86231	-1.37641	-0.501418	0.237652	0.407351	0.2835	-0.726991	-0.0489548	-1.29931	1.56709	1.1266	1.40966	1.08405	-0.417727	1.36886	1.13913	1.14756	1.25738	0.327818	-0.0326362	0.318521
13058	CAMK2N2	H200019990	-1.35959	0.267593	-0.32635	-2.18821	-2.19953	-2.67137	-0.453859	-0.524991	0.135053	0.630843	0.170206	0.660717	0.680486	0.673668	0.114388	0.496055	0.262623	0.477839	0.486248	-0.252783	0.321154	0.398741	0.610302	0.702319	1.21066	0.647969	1.02983
29456	RFNG	H200002198	-0.935647	0.212389	-1.55342	-1.462	-2.42574	-1.18748	-0.202558	-1.01582	-0.711629	-0.477345	1.02801	0.380227	0.342779	0.169249	0.285316	0.97434	1.3638	1.47515	-0.60938	0.550142	-0.209988	0.655547	1.05243	1.60047	0.353851	0.246524	0.10079
10709	ARL6IP4	opHsV0400005059	-0.247119	-0.510255	-1.03404	-2.8154	-2.59066	-1.83166	0.00994118	-0.296512	-0.00635611	0.171473	0.836989	1.11678	0.307372	0.0736095	0.554781	0.673683	0.734106	0.697673	0.620894	-0.294292	0.376239	0.364624	0.683807	0.605407	0.614026	0.638472	0.546413
34448	VTI1A	H200014437	-1.73043	-1.66632	-0.395105	-1.16363	-1.41548	-0.628063	-0.724616	0.280491	-0.828302	0.325413	0.6731	0.892189	0.741715	0.890271	2.308	0.370465	0.800816	0.891205	0.532993	-1.4713	-0.772356	1.03077	0.718903	0.435165	-0.672752	0.270174	0.306672
13155	CASP6	H200000768	1.4372	0.533352	0.284442	3.00388	1.06939	2.55913	-0.0385309	-0.213397	0.191718	-0.672672	-0.650048	-1.11999	-0.635355	-0.612325	-0.780862	-1.10151	-0.658532	-0.826814	0.101142	-0.131252	-0.149317	0.23387	-0.106576	-0.274531	-0.633146	-0.37836	-0.430906
12007	C18orf21	H200004410	0.974111	0.511876	0.557163	0.528475	0.785214	1.25835	0.195801	0.35492	0.225108	-1.38144	-1.8012	-0.93369	-2.19868	-2.30078	-1.81264	0.292683	0.567366	0.26708	0.348128	0.53552	0.627946	0.240994	0.270008	0.491264	0.418677	0.629712	0.34803
33982	UBE2S	H300006913	-0.557864	-0.0549095	-0.728337	-1.65452	-1.60491	-1.54621	0.0558671	0.356065	0.0965625	0.826615	2.20469	2.18102	0.0760985	0.456512	0.143838	1.2663	1.13367	0.979893	0.0673943	-0.52506	-0.942766	-0.361783	-0.780223	0.382472	-0.316932	-0.807916	-0.345569
34417	VPS37A	opHsV0400001320	0.116587	0.922889	1.29802	-1.00944	0.0360734	-0.764741	-0.0183994	-0.85038	-0.112755	0.300665	-0.603987	-1.04064	-1.12738	-1.16384	0.150313	-0.877095	-1.78259	-1.74746	0.561684	0.188087	1.69698	1.07336	1.56069	1.27935	0.716004	0.255324	0.942704
25910	PDK1	H300006468	2.21838	0.890484	-0.205086	0.944059	-0.0661154	0.040776	1.11737	0.952102	0.771113	-0.121193	0.41429	-0.00250694	0.172826	0.455797	0.373468	0.432067	0.311322	0.302684	-2.5177	0.610633	-0.0243778	-1.56682	-0.998989	-0.795233	-1.63252	-0.898977	-1.17785
7039	opHsV0400011138	opHsV0400011138	-0.700358	-0.615066	0.606486	1.16491	0.627223	1.09415	0.628906	0.808406	0.866329	-1.36265	-1.33318	-1.56041	0.107116	0.0894851	0.207291	-2.02347	-1.83238	-1.63112	1.04617	0.673385	0.0211754	-0.0720908	0.575658	0.363674	0.546334	0.899765	0.804265
22744	MYEOV2	H300002313	0.0482265	2.39497	-0.0937329	-0.686862	-1.26628	-0.59934	-0.37809	-0.294996	0.136972	0.976175	1.90565	1.07794	0.614822	0.990026	0.292831	1.21891	0.792982	0.56545	-0.629746	-0.139786	-1.50046	-0.916745	-1.23465	-0.487995	-0.760776	-1.16225	-0.863254
15410	DHCR24	H200006150	0.149989	0.365379	1.21568	1.42827	1.22692	1.10753	-0.0723372	0.0505607	0.204731	-2.08762	-1.78016	-2.1826	-1.24305	-1.51546	-1.16773	0.26571	0.25761	0.188709	0.417573	0.851329	0.497989	0.407318	0.598448	0.334172	0.211162	0.211851	0.0580245
6519	opHsV0400010555	opHsV0400010555	0.282515	-0.0732101	2.32371	1.57475	2.07186	1.75291	0.590626	0.336501	0.343207	-0.752379	-0.682242	-1.00176	-1.05481	-1.09923	-0.584912	-0.0850139	-0.366398	-0.370821	-1.736	0.960998	-0.609632	0.105261	-0.418577	-0.436639	-0.195098	-0.492214	-0.383404
1207	H300007887	H300007887	0.841674	0.242477	0.557126	2.40491	2.04869	1.20885	0.211601	0.750302	0.462341	-0.920748	-0.0523892	-1.12447	0.732968	0.160715	0.726721	-0.417632	-0.15396	-0.42751	-0.485653	0.483841	-1.63097	-1.03113	-1.28007	-1.36648	-0.522826	-0.925414	-0.49296
32190	SYNCRIP	H300019398	1.10817	0.76346	0.178495	2.71467	2.1057	2.10093	0.164541	-0.0539908	0.24476	-1.05837	-0.734463	-0.901318	-0.346683	-0.602416	-0.738723	-0.445277	-0.274542	-0.0521648	0.250506	-1.63413	-0.0822655	-0.291896	-0.573088	-0.374737	-0.292497	-0.545841	-0.628832
21772	MAP3K4	H300013065	-0.548325	-0.30141	-0.011807	-0.611493	-0.942358	0.98809	-0.560609	-0.866634	-0.814702	0.186488	1.12869	1.09912	1.23541	0.325884	1.06661	1.97461	0.614845	1.64519	-2.436	-0.945293	0.0359061	-0.48397	-0.725999	-1.15413	-0.194086	0.576127	-0.280147
35336	ZNF410	opHsV0400002820	-0.430423	0.770247	0.834763	2.17259	2.16835	1.86423	0.541901	0.428927	0.94324	0.756145	-1.55646	-1.10817	-0.171665	-0.227442	-0.264791	-0.952137	-0.810756	-1.15384	-0.741837	-0.253813	-0.833888	-0.687584	-0.73414	-0.767975	0.277485	-0.0152829	-0.0476658
17835	GLRA4	H300009427	-0.434348	1.02713	-1.2467	-0.682297	-0.785727	-1.73883	-0.879136	-0.574274	-0.409644	1.21137	1.43591	2.02998	1.28749	2.03045	1.14374	0.0766286	0.192265	-0.148831	0.449248	0.211842	-0.245151	-0.805912	-0.416599	-0.534621	-0.701159	-0.751893	-0.740931
11905	C16orf3	H200002404	-0.865542	0.53511	-0.707501	-1.40164	-1.30059	-0.46779	-0.226605	-0.291662	0.0312748	1.80268	2.12857	2.24521	0.879665	0.349381	0.254108	0.830843	0.34869	0.505687	0.772757	-0.927295	-0.969222	-0.394053	-0.901521	-0.600123	-0.219272	-0.0599474	-1.35123
12124	C1orf142	H300020242	-0.826464	0.831264	0.735835	-2.19279	-1.44992	-1.816	-0.918013	-1.41864	-1.15554	0.456785	0.797764	0.895143	0.653337	0.664187	0.316128	1.44948	1.09482	1.64277	0.674827	0.266974	-0.0626127	0.028148	-0.0263778	0.19044	-0.138353	-0.696695	0.00350181
18565	HECTD1	H200015089	1.04211	0.610891	0.619153	1.5762	2.03186	1.4397	0.60005	0.562015	0.725574	-1.09984	-0.458344	-1.97051	0.51933	-0.631206	0.616139	-0.268343	0.0676895	0.00488956	-0.456247	0.500933	-1.61424	-0.943216	-1.21144	-1.48678	-0.335348	-0.228261	-0.212763
10610	ARHGAP11A	opHsV0400006847	1.51115	-0.170327	0.45583	0.931015	0.73843	0.193859	0.645164	0.938651	0.453317	0.436896	0.971493	0.143353	0.246319	0.158244	-0.0484676	0.578346	0.415174	0.666762	-1.32261	-3.70816	-0.314199	-0.634749	-0.483147	-0.471327	-0.981948	-0.648984	-0.700079
32035	STRA8	opHsV0400000428	0.754244	0.142187	1.0701	0.69878	0.920328	0.838631	0.403799	0.526669	0.456712	0.178315	0.646561	0.422647	0.143658	0.605879	0.374153	0.359479	0.544941	0.158462	-3.81207	-1.48103	-0.541232	-0.158064	-0.868675	-0.0944396	-0.448071	-0.555776	-1.2862
18099	GPR172B	H200011684	-1.88503	0.316138	-0.475716	-0.80813	-0.658006	-1.53699	0.343224	-0.00189744	-0.156192	0.862146	2.30928	1.76655	1.8118	1.29626	-0.0793598	0.753628	0.0335869	0.590559	-0.469023	-0.0297267	-0.371774	-0.709413	-1.38705	-0.588075	-0.441981	-0.265032	-0.219771
19375	IGF2BP2	H300012045	0.349104	-0.545031	-1.6934	0.391642	1.31706	0.100323	-0.791678	-1.14596	-0.670025	1.72078	1.53315	1.96019	0.219083	1.42574	0.375216	0.810453	0.297717	0.754614	-0.852337	-1.50844	-0.498488	-0.947631	-0.645522	-0.297434	-0.438054	-0.879936	-0.341124
24573	NPTX1	H200007094	-1.39381	-0.00221229	-0.171179	-2.01256	-2.05757	-2.31396	0.0842361	-1.04736	0.293823	0.822094	0.811716	0.759706	0.688728	1.24326	1.48708	0.852703	0.0402722	0.734715	-0.0898298	-0.0798741	-0.748561	0.805454	0.28147	0.145404	-0.0869787	0.504635	0.44859
12116	C1orf131	H300020834	0.555906	-0.0487023	0.110554	1.77826	1.22909	2.64453	1.50893	0.928621	0.636696	-0.0826716	-0.206763	-0.446058	-0.984032	-0.0790747	-0.755785	-0.835576	-0.571532	-0.947514	-0.395557	-2.27203	0.194434	-0.236447	0.139549	-0.118899	-0.517372	-0.239995	-0.988564
35255	ZNF313	H200001921	1.28065	-0.125053	1.55875	2.20219	1.46603	0.924664	0.179478	0.657772	0.207301	-0.407065	-1.41535	-1.77465	-0.606841	-0.781469	-0.983251	-0.549758	-0.697962	-0.596564	-2.06859	0.582951	0.450417	0.254808	0.444945	-0.0318972	0.0225705	0.0417487	-0.235822
32576	TESK2	H200001716	-1.3898	-0.994176	-0.316779	-1.58364	-1.33512	-1.37795	-0.644191	-0.498366	-0.364844	1.58993	1.10805	2.34677	0.584789	1.44676	1.31514	0.0882093	-0.457372	-0.408653	0.877597	-0.760649	0.216449	0.233049	0.627861	0.407488	-0.25815	-0.266795	-0.185612
10659	ARHGEF19	H300020202	-0.945641	-0.0210121	-0.428194	-2.21528	-1.70239	-1.41219	-0.168206	-0.323655	0.00340742	1.72314	1.58157	1.63967	0.909831	1.88133	1.20309	0.13785	-0.179583	-0.138999	0.221758	-0.397749	-0.642278	0.0671002	-0.495386	-0.151777	-0.205739	-0.0328336	0.0921666
11591	C10orf27	H200012942	0.156309	0.609456	-1.01889	0.412114	0.596274	1.24612	-0.482706	-2.02135	0.661131	-1.17251	-1.29678	-0.794576	-1.75305	-0.785152	-1.40898	-0.668988	0.00953415	-0.304888	1.15908	0.789077	0.967963	0.94315	1.28775	0.637494	0.305952	1.06817	0.858309
10529	APOC1	H300008773	-0.0101501	0.376132	2.0997	1.21105	1.11023	1.1554	0.491679	0.156247	0.675675	-1.22314	-1.47454	-1.04737	-1.39599	-1.79278	-1.16943	-0.11496	-0.317827	-0.193878	-0.248777	2.14419	0.0207254	-0.317648	-0.302086	-0.462004	0.352093	0.0511935	0.226266
245	H200005672	H200005672	0.180799	0.716575	0.404551	0.475153	0.273896	0.422231	0.371928	0.476398	0.56424	-1.77623	-0.266658	-2.18102	-2.1289	-1.90032	-1.99308	0.483197	0.240679	0.213736	1.10385	0.700947	0.510241	0.315316	0.386734	0.5382	0.611195	0.527942	0.728393
14073	CIRH1A	H300020157	0.225832	0.789373	0.628918	2.72484	2.78995	1.70215	0.0340882	0.35121	0.106897	-0.0813495	-0.592459	-0.910481	-0.0824809	-0.544736	-0.828796	-0.364513	-0.441579	-0.921091	-0.0526127	-1.16457	-0.350091	-0.356947	-0.278328	-0.285343	-0.613093	-0.531255	-0.953541
19722	IQWD1	H300020218	-0.328189	-0.223182	0.230111	1.66077	1.6622	2.2937	0.562655	1.1523	0.429494	-0.727897	-1.14113	-1.39038	-1.33173	-1.99485	-1.18106	-0.412476	0.161862	-0.612594	-0.751823	0.137144	-0.129036	-0.236951	0.232452	0.354856	0.40988	0.595857	0.578
34263	USP7	H300011601	0.0160969	0.166189	0.216791	2.63273	2.20933	2.48392	0.50075	0.692587	0.431729	-0.683556	-0.693885	-0.415946	-0.556715	0.158157	-0.344308	-0.927676	-1.07604	-0.388381	-0.284842	-0.126307	-0.543862	-1.31467	-0.768424	-0.464526	-0.14194	-0.514798	-0.262406
28559	Q96KW1_HUMAN	H300004347	0.577205	-0.169577	0.476156	0.973677	-0.125058	0.485953	0.655068	2.1279	0.403271	-1.34038	-0.205249	-0.395424	-0.940562	-1.31799	-1.54065	-0.144212	-0.711989	-2.71848	0.331392	1.54038	1.0294	-0.451774	0.329806	0.348591	0.303155	0.244634	0.234756
26303	PLA2G10	opHsV0400009200	-0.682322	1.14476	-0.396921	-2.20183	-0.96385	-1.24044	-0.253128	-0.500803	-0.180759	1.35724	1.59471	1.7001	1.14541	1.87765	0.817157	0.51513	-0.0342418	0.355741	-1.05088	0.252037	-0.893194	0.0447374	-0.759353	-0.402492	-0.359963	-0.409135	-0.475365
27159	PSMA1	H300014826	1.94578	1.11258	0.509442	2.1688	1.00417	1.80268	0.754172	-0.147654	0.204322	0.357202	-0.970091	-0.706236	-0.830299	-0.524658	-0.598459	-0.29689	-0.227791	-0.746644	0.853677	-0.0140709	-0.29823	-1.78758	-1.17064	-1.19203	-0.098165	-0.788037	-0.315356
4427	opHsV0400007964	opHsV0400007964	-0.400529	0.172857	-0.406018	-2.43901	-2.00192	-2.37625	-0.409211	-0.599352	-0.172008	1.15837	1.12203	1.11137	1.11	1.59011	0.768329	0.173564	-0.0765848	0.484123	0.609249	-0.609721	0.0137296	0.252348	0.0583233	0.229783	0.303737	0.0720084	0.260669
18492	hCG_1776018	opHsV0400003683	-0.511221	0.550073	-1.24483	-0.384929	-0.463646	-1.08043	0.370895	1.01756	0.893791	0.751511	1.13541	1.1622	0.820756	1.03037	-0.134644	1.50708	1.08796	1.13433	0.51816	-1.72548	-0.160117	-1.11033	-1.7366	-0.519293	-1.06459	-0.747007	-1.09698
17201	FLNB	opHsV0400004917	-1.8443	-0.0108071	-1.21281	-0.072466	-0.376529	-0.28945	-0.907936	-0.82599	-0.782922	1.45676	1.70326	2.2058	0.681286	2.55854	0.367403	0.146092	-0.0336918	0.0478709	0.384398	-0.564042	-0.366469	0.0490368	-0.617455	-0.507347	-0.457551	-0.345592	-0.385075
13727	CDKL1	opHsV0400004705	0.0161398	-0.442764	0.470819	-2.61224	-2.08641	-0.727792	-0.880405	-0.979723	-1.29822	0.132311	0.268041	0.49713	1.20919	-0.654285	0.568067	-0.541144	-0.353848	-0.163746	1.13587	0.464055	0.563943	0.48588	0.839483	0.770466	1.23682	0.591199	1.49117
6293	opHsV0400010269	opHsV0400010269	-1.31527	0.94902	0.00710542	0.237037	0.98448	0.418778	-0.126659	-0.75781	0.1214	0.83741	0.954867	0.998792	1.39418	1.10869	1.19629	0.315376	0.50662	0.519197	-0.188285	0.923865	-1.00784	-1.1935	-2.12422	-0.976102	-0.999507	-1.22629	-1.55761
15466	DIDO1	H300022113	0.0381492	-0.28428	-0.386261	-2.1984	-1.97114	-1.54218	-0.780454	0.0183999	-0.614347	1.19208	1.05463	1.42657	1.22375	1.58933	0.306413	0.783297	-0.013896	0.876665	-1.55389	-0.468779	0.466839	0.567383	0.532238	0.17902	-0.252558	0.0570464	-0.245622
15199	DCK	H200000176	0.840335	-0.162129	1.57485	1.63534	2.25857	0.821932	0.260798	0.200287	0.325202	0.689317	-0.562222	-1.01554	0.17202	0.162321	0.86932	-0.109464	0.539001	-0.0877859	-0.368615	-2.00454	0.138639	-1.04614	-0.431411	-1.03061	-1.37505	-0.883488	-1.41094
20989	LILRA1	H300017289	-0.192816	-0.567	1.72515	0.545669	0.461485	0.529121	0.538082	0.297529	0.711756	-0.664831	-0.403025	-0.618385	-0.532441	-0.263148	-0.988886	-2.24372	-2.16917	-1.44666	1.14941	-0.486729	0.812804	0.981667	0.435551	1.81121	0.323234	0.286129	-0.0319728
5999	opHsV0400009923	opHsV0400009923	0.882663	-0.218044	1.52852	-0.320034	-0.935178	-0.600318	-0.563689	0.189284	0.596036	-1.34219	-1.27438	-1.18987	-1.46786	-1.17291	-1.47199	-0.145208	0.201621	-0.506256	1.35644	-0.089451	1.96612	0.0664295	0.591027	0.866831	1.06027	1.05606	0.936084
4323	opHsV0400007854	opHsV0400007854	0.0689435	0.586643	0.599222	1.78328	1.81725	0.287831	1.2993	0.599792	0.537609	0.518355	0.212316	0.345945	0.577312	-0.164054	0.345005	-0.259028	-0.309659	-0.304004	-1.99592	0.0285352	-1.15055	-1.64685	-1.71354	-2.02581	-0.0466024	0.286253	-0.277573
19759	ISCA2	H300005096	1.88433	0.771829	0.389159	0.479059	0.276678	1.31629	0.1166	0.728188	0.652371	-1.27179	0.116226	0.0625638	-1.63437	-3.00168	-1.48157	-0.972708	-0.109862	-0.746489	-0.246089	0.865831	0.433777	0.152293	0.370942	0.226334	0.538464	0.327733	-0.244096
13302	CCDC34	H300018823	1.5053	0.704123	-0.413379	1.71752	-0.217782	-0.799288	0.0475009	0.363809	-0.0303989	0.86663	1.31688	1.07648	0.885971	2.03578	0.390032	-0.440963	-0.276659	0.418587	-0.798943	-1.36926	-1.46361	-0.447077	-0.891253	-0.933394	-1.32216	-1.00328	-0.921162
16103	EID1	H200006215	2.4968	0.708537	-0.714426	2.21813	1.49482	0.985196	0.60303	0.879479	0.68251	-0.466816	-0.881282	-0.614896	-1.08839	-0.51077	-0.770434	-0.162645	0.380665	-0.328114	0.259521	0.303809	-0.180573	-0.803408	-0.62223	-1.2121	-0.864103	-0.516865	-1.27544
17948	GNPTAB	H300021754	0.162371	0.0555541	1.93968	1.54898	1.5902	1.57583	1.1724	0.66405	0.454903	-0.591692	-0.221279	-1.04016	-0.580509	-1.58817	-0.482226	-0.429869	-0.499265	-0.794436	-0.336258	1.71198	-0.648459	-1.18813	-0.978724	-1.0667	0.0732868	-0.379163	-0.124208
11053	ATPIF1	H300007968	2.55431	1.35109	1.00135	1.14679	0.32982	0.627075	-0.334883	-0.306445	-0.0744639	-0.0300307	0.327761	0.33096	0.937531	1.41167	0.497724	-0.629023	0.187041	-0.18177	-0.625319	-0.192395	-1.28055	-1.48244	-1.2132	-1.44147	-1.19565	-0.632663	-1.08283
33378	TPTE2	H300011394	-0.845385	0.157805	-0.746604	-1.50497	-1.54986	-1.30219	-0.972521	-0.285744	-0.517493	1.23763	1.08691	2.21287	1.8726	1.38872	1.01824	-0.0363625	-0.695804	0.469907	-0.0953673	-0.788457	-1.11053	0.362648	0.159602	-0.209041	0.0854815	0.311979	0.295945
27244	PTCHD2	H200015739	-0.264698	0.0307318	-0.130427	-0.498447	-0.468653	0.475948	1.26934	0.268666	0.788721	-0.830731	-1.43673	-0.666788	-0.061656	-0.417386	-6.08629e-05	-2.54632	-0.504954	-2.27637	1.1312	1.3687	1.14283	0.51781	1.06354	0.844385	-0.189288	0.837422	0.553209
15911	DYNC1I2	H200005629	0.00239399	0.549899	0.492182	1.20936	1.30687	1.18247	0.444021	0.527614	0.59372	-1.62918	-1.90595	-1.6819	-1.92678	-1.66489	-1.63375	0.392297	0.449412	0.457885	0.402203	0.623428	-0.0474023	0.229711	0.144857	0.182191	0.442448	0.454976	0.401927
15197	DCHS2	opHsV0400003252	1.11451	-0.644104	1.11017	1.2709	1.04856	0.617246	0.587265	-0.0199867	0.867813	-1.12938	-1.0044	-0.742817	-1.23753	-1.30198	-0.542818	-1.28536	-0.991103	-0.997172	-1.73996	-0.628423	0.879609	0.415638	0.382737	0.405505	1.28417	1.13052	1.15039
24794	NUP88	H200008028	-1.64464	1.07657	0.251663	0.712739	-0.525739	-0.409685	0.767657	0.668956	0.465223	-1.00391	-0.759086	-1.37968	-1.19572	-0.859161	-1.49161	-0.345443	-0.629744	-1.03733	0.806013	-0.774109	1.33371	1.94501	0.513111	1.28338	0.834296	0.724681	0.672847
14608	CRBN	H200002778	1.06429	0.344081	0.42306	2.237	1.80212	1.35596	0.334694	1.108	0.687562	-1.18143	-0.286751	-0.761729	0.119132	0.377308	0.0179973	-1.5346	-0.844472	-0.825783	-0.458609	0.545026	-1.94099	-0.750136	-0.395383	-1.19943	-0.415141	-0.1124	0.290631
26822	PPP2R5A	H200014024	0.679842	0.232683	1.07216	2.07215	1.2058	1.76055	0.06178	0.580113	-0.171396	0.764039	0.458931	-0.537027	0.824785	-0.0983611	0.198011	0.0586313	0.0123848	-0.569351	-0.837556	0.960772	-0.848983	-1.10135	-1.49709	-1.45423	-1.5687	-0.968609	-1.28999
21016	LIMS3	H200011817	-0.858937	0.36911	2.17433	1.14607	1.16451	1.09459	0.426879	0.478706	0.92911	-0.997527	-1.45227	-1.48422	-1.33735	-1.72422	-0.960175	-0.286929	-0.331941	-0.34364	-0.432052	1.86032	-0.174445	0.111308	-0.146356	-0.0215681	0.3993	0.152335	0.245058
10502	API5	H300021048	0.236702	0.261031	0.220733	2.62451	2.56368	2.15515	0.695246	0.425654	0.148044	0.00663461	0.117711	-0.474869	-0.419635	-0.125384	-0.392642	-1.05662	-0.876107	-0.78587	-1.10057	-0.893378	-0.270621	-0.884265	-0.408442	-0.52673	-0.318555	-0.699133	-0.222272
9641	ACBD3	H300000150	0.218102	0.533991	0.0446873	2.78272	2.21752	2.10239	0.492838	0.488994	0.477744	-0.114648	0.110909	-0.661211	-1.02461	-0.667499	-0.721808	-0.51023	-0.316986	-0.57301	-0.236706	-0.430745	-1.56634	-1.07359	-0.754776	-0.497914	-0.124193	-0.153116	-0.0425156
25224	OR51T1	H300005463	-0.630213	-0.503896	-0.284262	-2.05525	-0.327578	-1.2957	-1.6947	-1.28954	-0.757937	1.03083	0.2634	0.398622	-0.492363	0.112702	0.0180565	1.23816	-0.80778	-0.0135368	-0.695048	0.474863	1.70232	0.262302	1.70602	1.23137	1.26251	0.395736	0.750889
22515	MS4A10	H300008009	-0.158962	-1.77829	-0.511585	-1.79477	-1.86501	-2.11463	0.196806	-0.922355	0.184871	1.17116	0.882542	0.569495	0.505768	0.733529	0.902038	0.867357	0.788823	0.812621	-1.50934	0.356728	-0.161824	0.416778	-0.125972	0.502387	0.621912	0.547616	0.882312
12598	C4orf31	H200002527	-0.975904	0.679002	-0.513429	-0.974298	0.547899	-1.2062	0.295101	0.80522	0.905544	-1.34709	-0.875297	-1.05816	-1.30803	-0.53725	-1.21761	-0.547064	-0.730127	-0.259741	-0.740583	0.752771	1.4983	0.468569	1.32112	0.817291	1.37643	1.18048	1.64306
23191	NGFRAP1	H200002676	2.23386	0.85966	-1.65621	0.948671	0.922392	0.907579	0.70823	0.529974	0.130586	-0.101799	0.275132	0.233619	0.439366	0.173889	0.214687	0.726599	0.655646	1.09807	-0.802906	0.226558	-1.28506	-1.25216	-1.27687	-1.29999	-1.16964	-1.21518	-1.2247
3378	opHsV0400005564	opHsV0400005564	-0.943344	0.461593	-1.00133	-1.47859	-1.5402	-1.76998	-0.770353	-0.788257	-0.537985	1.73035	1.57532	0.689948	1.24914	1.60415	1.04908	0.333129	0.0358522	-0.447069	1.58707	0.326663	-0.519224	-0.349267	-0.394042	-0.0588496	-0.131238	0.0877147	-0.000293173
29718	RNF19	H200004867	1.07723	-0.53778	1.65569	1.03332	1.21283	1.89641	0.609471	0.70423	0.349376	-0.119876	-0.635431	-0.146792	1.84051	0.799897	0.525357	-0.853776	-0.350445	-0.84831	-0.389504	-0.80317	-0.970006	-0.773429	-0.461983	-1.0839	-1.24191	-1.30929	-1.17872
11378	BLZF1	H300006734	0.575789	-0.214918	0.129342	2.5489	2.46089	2.16255	0.588128	0.525529	0.471445	-0.529138	-1.26513	-1.51024	-0.532364	-0.918871	-0.423641	-0.397852	-0.0856926	-0.230561	-0.662991	-0.424512	-0.125557	-0.935801	-0.19009	-0.36068	-0.203916	-0.334242	-0.116386
10301	ANKMY2	H300021347	0.4653	-0.574471	1.68352	2.27864	1.79284	1.43036	0.711947	0.577729	0.237168	-0.182735	-0.990298	-1.72682	-0.552508	-0.776356	-0.0592349	-1.16558	-0.946841	-1.10229	0.383725	-0.209465	1.14991	-0.69291	-0.208541	-0.268743	-0.187551	-0.832427	-0.234381
27228	PSTPIP2	H300016898	2.59298	-0.407907	0.764099	1.9735	1.52379	1.39489	0.120856	0.0647664	0.0980342	-0.643639	-1.4807	-1.49266	-0.6415	-0.779476	-0.355649	-0.957653	-0.930491	-0.812352	-1.16991	-0.414331	0.26289	0.118654	0.277931	0.222215	0.239004	0.141084	0.291562
22457	MRPL43	H300011428	-1.37384	-2.74073	-0.119566	-1.42651	-0.267962	-2.0909	-0.247464	-0.396291	-0.510389	0.373664	0.207078	-0.421333	0.962034	1.10821	1.07466	-0.335841	-0.197278	0.186367	1.28414	1.43828	0.271762	0.777802	0.251099	0.811751	0.464818	0.35869	0.557746
30840	SLC11A1	H300018901	-0.370111	-0.543288	1.06503	-0.031112	0.589842	0.71099	-0.200879	-0.301501	0.0839101	-0.527486	-1.15214	-0.408729	-2.65529	-2.20482	-1.68704	-0.0360082	0.0721466	0.0345237	0.820684	1.21484	0.945811	0.732127	0.84883	0.943441	0.849942	0.241129	0.965156
31274	SLC9A6	opHsV0400006208	0.541845	0.504914	1.47255	1.68077	2.25828	1.73387	0.10035	0.351215	0.425051	-0.60331	-0.660563	-1.22542	-0.951177	-0.759524	-1.08478	-0.434292	-0.273971	-0.565621	-1.12047	1.76554	-0.193374	-0.859837	-0.433951	-0.970275	-0.313441	-0.338428	-0.0459306
20650	KRT7	H200003337	-0.674758	0.386923	-0.518812	-1.63585	-1.58919	-2.07169	-0.1145	-0.143097	-0.0306397	0.56072	1.57598	1.79556	1.3771	1.49979	0.933439	0.520788	0.0895625	0.770883	0.677755	-1.23161	-0.896837	-0.174635	-0.32285	-0.821682	-0.0615801	0.256952	-0.157722
20126	KHDRBS1	H300011869	-1.08032	0.445495	-0.947607	-0.678873	-0.79983	-1.43099	-0.71778	-0.927172	-0.560352	0.580163	2.22171	1.60637	1.8822	2.11161	0.687875	0.0658276	-0.174023	0.0365022	0.803288	-0.65169	-0.870065	-0.0299102	-0.38748	-0.579727	-0.252394	0.042172	-0.394995
33576	TROAP	H200008012	0.116713	-0.647225	-0.113364	-1.48714	-0.820415	-1.04249	-0.755666	0.0179952	0.435254	0.777443	0.977707	1.50266	0.891099	0.0313638	0.263149	1.96836	1.30184	1.64187	-1.19319	-2.13506	-0.977578	0.413417	-0.00586717	0.259338	-0.359273	-0.471649	-0.589282
20769	LAMB2	H300021287	-1.00013	-0.284825	-1.39783	-1.2881	-1.02094	-1.26149	0.624723	0.146443	-0.131899	1.35968	2.18187	1.9403	0.89386	1.71376	1.46692	-0.0643281	0.0177815	-0.210204	-0.143375	-0.426131	-0.637742	-0.0525774	-0.23612	-0.506176	-0.616251	-0.361375	-0.705856
20408	KIF5B	H200013666	0.65279	0.373337	0.146069	1.56247	2.22932	2.04431	0.505613	1.0887	0.76327	0.195758	0.402808	-1.29542	-0.689866	-0.429375	-0.549663	-0.985037	-0.896593	-0.533334	-0.283108	-0.0282096	-0.744666	-1.00477	-1.30089	-1.54434	-0.106505	-0.519349	0.946662
23326	NNP1_HUMAN	H200011712	-0.848209	-0.563406	0.0839387	-1.31994	-1.06238	-0.93953	-0.706593	-0.525674	-0.42228	0.968315	1.813	2.64898	0.696757	2.42562	1.05804	-0.118408	-0.122168	-0.218569	-0.588615	-0.206264	0.0427473	0.0275604	-0.160171	-0.435606	-0.461425	-0.696812	-0.368898
23642	NP_001018071.1	opHsV0400000570	-0.0108691	-0.0652913	-0.658382	-1.95715	-2.13467	-1.67469	0.0688966	-0.309981	-0.102944	1.98831	1.12262	1.54288	0.994015	0.41255	0.747958	1.18347	0.237163	0.730667	0.224918	0.981745	-0.664601	-0.176648	-0.378132	-0.643139	-0.206857	-0.833395	-0.418438
35192	ZNF233	H300003392	-1.48283	-0.482781	-0.59887	-0.265822	-0.591487	-0.32023	-0.868397	-0.162208	-0.411778	1.4025	1.95065	2.21629	1.44017	2.11876	0.944662	-0.308164	-0.0811249	-0.335247	-0.407009	-1.07314	-1.02546	0.183378	-0.242869	-0.0784273	-0.744302	-0.214858	-0.561407
27253	PTENP1	opHsV0400000823	1.72298	-0.967472	0.176166	1.51851	1.46877	1.81458	-0.0861491	1.58595	0.263755	-1.00096e-05	0.283115	0.418781	0.14565	0.476347	0.584722	-0.0166429	-0.523954	-0.252801	-1.53408	-0.771173	-0.998198	-1.06228	-0.458532	-0.957347	-0.444216	-0.390968	-1.99551
17231	FMO6P	H200015460	-0.176585	0.705454	1.35426	-1.0222	-0.276744	-0.888747	1.05902	-0.159664	1.15223	-1.44573	-1.37239	-1.20866	-1.26572	-1.11125	-1.20276	-0.14396	-1.40427	0.31106	0.448835	0.229825	1.13621	0.380804	0.587384	0.596546	0.877553	1.77403	1.06548
146	atc02	atc02	-0.367596	0.0214309	0.0215248	-2.43349	-1.6296	-3.10824	-0.939713	-0.68733	-0.191911	0.451294	0.805193	0.986861	0.656481	0.187847	0.433721	0.722035	0.574039	0.704991	0.708538	-0.102416	0.422092	0.342385	0.0593904	0.260833	0.878516	0.664667	0.558452
2534	opHsV0400002693	opHsV0400002693	0.613113	-0.130138	0.0301239	2.29876	1.25473	3.09879	0.617323	0.374828	0.0621032	0.0900053	-0.260398	-0.454663	0.741879	0.0172294	-0.114091	-0.158182	0.032744	-0.111745	-1.08555	-0.71642	-0.816596	-1.39843	-0.702672	-1.10562	-0.704907	-0.487216	-0.98501
22026	MEF2A	H300014697	-0.386287	0.233225	1.36453	1.53591	0.946713	2.40723	-0.0072114	0.361564	0.354708	-0.895743	-1.54414	-1.71518	-0.398337	-0.336245	-0.0909511	-1.24941	-1.19757	-1.5494	0.449511	1.29076	0.840077	-0.175527	0.287029	-0.039505	-0.302803	-0.206191	0.0232394
11233	BCAP29	H300002766	1.31275	0.483196	0.176871	0.691187	2.09151	2.70015	0.235467	0.687916	0.0889785	-0.510251	0.268678	-0.525821	0.481734	0.0805455	0.919841	-0.599888	-0.220139	-0.656494	-1.10699	0.076256	-0.358659	-1.64445	-1.37894	-0.825076	-0.884351	-0.550766	-1.03325
30391	SEC24D	H200002852	2.25785	0.555914	-0.908552	2.07079	2.01579	1.6739	0.394107	0.468296	0.837094	-0.333123	-0.770927	-0.914063	-0.721893	-0.885809	-0.438874	-0.320592	-0.32204	-0.233411	-0.405072	0.36589	-1.09503	-0.57845	-0.854941	-1.16515	-0.267594	0.0679823	-0.492105
4217	opHsV0400007732	opHsV0400007732	-1.64852	1.24057	-0.200377	0.513102	0.0203006	0.260031	-0.664067	-0.928401	-0.830341	0.306542	1.77576	1.66369	1.12646	1.89897	0.792289	0.478549	0.429903	0.526935	-0.784984	-1.33546	-1.50988	-0.0156686	-0.323564	-0.170103	-0.927223	-0.671889	-1.02263
15674	DNHD1	H300019300	-0.945462	0.595669	-0.507238	-2.19978	-1.71034	-1.83807	-0.876696	-0.997827	-0.178832	1.88554	1.05932	1.88182	0.96927	0.943208	-0.0631116	0.366624	0.271009	0.118263	1.0194	0.34752	-0.217346	0.0443649	-0.204317	-0.0235346	0.155619	0.0431952	0.0617202
27514	Q4G0D9_HUMAN	H200004028	-1.32925	-0.428144	-1.39648	-1.38286	-1.23302	-1.03154	-0.449131	-0.931975	-0.0870719	-0.572838	1.01135	1.7574	0.284593	0.192398	0.653535	1.89069	1.67773	1.05759	0.660829	-1.24852	-0.474002	0.765364	0.876912	0.492937	-0.143731	-0.25079	-0.361977
28607	Q96NR0_HUMAN	opHsV0400001154	-0.144284	-1.02127	-2.22136	-1.15752	-0.241433	-2.16377	-0.0799821	-1.52487	-0.197589	1.36771	0.547574	1.55206	1.40519	0.643383	0.813039	0.55564	0.68263	-0.288578	0.509675	-1.02172	-0.0684319	1.13338	-0.113656	-0.0524164	0.158953	0.466753	0.460904
13224	CCAR1	H200014224	0.495981	-0.228104	0.0433226	2.40244	2.55237	2.01468	0.39771	1.14558	0.391939	-0.80878	-0.356172	-1.16854	0.24602	-0.269718	0.357319	-0.437759	-0.298645	-0.395774	-0.616076	-1.03682	-0.752885	-0.174868	-0.589757	-0.510766	-0.730396	-0.453126	-1.21918
29101	RABGAP1L	H200015787	0.735459	-0.0522289	1.33644	1.39785	2.12051	2.32747	0.265561	0.120873	0.341831	-0.466342	-0.151163	-0.28923	0.245624	-0.304787	0.16353	-0.250275	-0.0910671	0.0857292	-0.183061	0.765434	-0.800662	-0.968681	-0.993265	-1.23783	-1.67446	-0.715512	-1.72774
23211	NIF3L1	H200003093	0.153885	-0.271492	1.17058	2.75959	1.14049	0.814821	0.856249	1.76467	0.425341	-0.294756	-1.70661	-0.971512	-0.243911	-0.648082	-0.334543	-1.15648	-1.45833	-0.352264	-0.177235	-1.3018	-0.93632	0.0373345	0.172389	-0.0788587	0.223591	0.320224	0.0930316
7121	opHsV0400011235	opHsV0400011235	2.93659	0.631668	0.113038	1.23859	0.891157	0.937804	0.48142	1.28187	0.214329	-0.826391	-0.486464	-1.23739	-0.0497504	-0.494656	0.178282	-1.80905	-1.04358	-1.55573	-0.140369	-0.66762	-0.293895	-0.189026	-0.759195	-0.722089	0.422765	0.549029	0.398661
29609	RIOK2	opHsV0400000482	1.70066	0.217763	-0.635188	2.26781	1.90259	1.62004	0.351796	1.07596	0.456603	-0.299038	-0.645974	-1.09765	-0.110708	-0.178512	-0.439803	0.176741	0.581216	-0.0749235	-1.13848	-1.76043	-0.626148	-1.23347	-0.316847	-0.644558	-0.433086	-0.0523394	-0.664031
31444	SNCG	H200020441	-0.383926	0.796623	-1.84066	-1.38227	-2.06164	-1.57294	-0.421912	-0.748957	-0.232174	1.95408	0.892662	0.323205	0.204894	1.28237	0.548707	0.862312	0.869583	1.42592	0.868915	0.120587	-0.892074	0.457459	0.0169371	-0.248443	-0.486071	-0.0616831	-0.29149
20575	KPNA1	opHsV0400004051	0.281	0.089497	0.451731	2.38491	2.72714	2.08424	0.295642	0.498202	0.169744	-0.453239	-1.09637	-1.09709	-0.723866	-0.99741	-0.195962	-0.642215	-0.983437	-0.625756	-0.666515	0.121454	0.528903	-0.415407	-0.865354	-0.158559	-0.16965	-0.0768573	-0.464775
25811	PCTK3	opHsV0400005542	-0.291826	-1.32018	0.183638	-0.333159	0.236341	-1.11309	-1.59304	-1.93421	-3.0049	0.964689	0.405931	0.927221	1.14279	0.985302	0.80377	0.369949	0.317392	0.355427	0.0926859	-0.148329	0.450074	0.425362	0.787249	0.795369	0.158845	-0.297388	0.634081
31659	SPATA19	H300005314	-0.733884	-0.0126472	0.113948	-1.29783	-0.635086	-0.625003	-1.05252	-1.39189	-1.16714	0.402391	0.669395	1.38132	2.81366	2.23603	-0.0620915	0.806228	-0.0320512	0.773579	-0.769346	0.193263	-0.36436	0.0696851	-0.0564788	0.246886	-0.239245	-0.936747	-0.330071
34580	WDR65	H200020100	-0.114845	0.361972	-0.958935	-0.503441	-0.92551	-0.758466	-0.917006	-1.01374	-0.482016	1.13621	1.57947	2.47741	1.14379	2.23335	0.800106	0.15823	-0.22677	0.0443188	0.921803	-0.460525	-1.05261	-0.694719	-0.728452	-0.563434	-0.449466	-0.54085	-0.465864
12067	C19orf56	H200011616	0.100626	-0.536619	1.62317	0.897944	1.2436	0.333548	0.242712	-0.582482	-0.181997	-0.549086	-1.88557	-1.1046	-1.06504	-0.801975	-1.11829	-0.934597	-0.861632	-0.89996	1.11679	1.5649	2.2205	-0.513207	0.371645	0.0944974	0.458331	0.606696	0.160106
14855	CTRB1	H300001066	-1.42352	0.244052	0.360938	-1.22406	-1.50007	-2.10152	-0.788848	-0.75416	-0.357285	0.107289	-0.693419	0.257396	0.560709	0.254508	-0.824156	0.00278883	-0.86081	0.14704	1.7274	-0.14444	2.06049	1.43854	0.858499	0.878732	0.432058	0.718812	0.623023
8232	opHsV0400012447	opHsV0400012447	0.841396	-1.40658	1.06063	1.23201	1.14109	0.79101	0.115472	0.0268324	0.370477	-1.97938	-1.60866	-2.13819	-0.79797	-0.562752	-0.596776	-0.742202	-0.139204	-0.79283	1.1527	1.55685	0.400727	0.10716	0.242334	0.329784	0.503116	0.0846185	0.80833
1145	H300007137	H300007137	-0.0180332	0.588721	2.09701	-0.748525	-0.774446	-0.372359	-0.126687	-0.431414	0.232607	-0.533311	-0.641424	-0.57546	-1.21075	-1.01484	-1.22361	-1.14954	-0.477489	-1.50848	1.85173	0.0840919	1.80079	0.323022	0.810023	0.9395	-0.142277	0.957723	1.26342
27916	Q6ZUR4_HUMAN	H300000825	0.378883	-0.10443	0.488368	2.41721	2.09479	2.59014	0.172109	0.240427	-0.117938	-0.90684	-1.00583	-1.13021	-0.958422	-1.22543	-0.665233	-0.688175	-0.502973	-0.99828	0.0222627	0.0216059	0.595465	0.140206	0.179417	0.118211	-0.422609	-0.363789	-0.368944
21904	MBNL1	H300015869	-0.0557293	0.687538	0.328632	2.24388	1.39315	1.53646	-0.297589	0.240462	0.214917	-0.720758	-0.569612	-1.05162	-0.566924	-0.973059	-0.594692	-1.41024	-1.47349	-1.80695	1.49969	-1.08643	0.152744	0.0135322	0.319182	0.116797	0.565202	0.93374	0.361167
19714	IQGAP1	opHsV0400000381	0.569509	-0.12787	1.20332	1.91038	1.96553	1.82805	0.436355	0.67198	0.752867	-1.4829	-0.180228	-1.17474	-0.177483	-1.35476	-0.0838998	-0.585244	-0.468055	-0.626528	-0.428806	1.36868	-0.926116	-0.845394	-1.03701	-0.970511	-0.0423676	-0.240314	0.04556
11126	B3GNT4	H200014477	-1.22691	-0.43808	0.0426498	-0.921978	-0.712728	-1.99598	-0.0309428	-0.11215	-0.0646108	1.06329	-0.211276	0.471719	1.13281	1.53334	0.0775092	2.10736	1.24229	1.9161	-0.113319	-1.43569	0.218561	0.0747456	-1.01094	-0.762238	-0.145233	0.00590364	-0.704211
13377	CCDC86	H200000897	-0.942468	0.956009	-0.800777	-0.495565	-0.753485	-1.26578	-0.676499	-1.59394	-0.556125	0.62518	1.48011	1.02289	0.33085	0.304314	-0.239732	1.39969	1.80068	2.48818	-0.239567	-0.895387	-0.995334	0.433887	0.0269232	-0.249662	-0.402017	-0.386957	-0.375419
22602	MTG1	H300022751	-0.92713	-0.56953	-0.709472	-1.24724	0.0720762	-0.240097	-1.44114	-0.501946	-1.07711	0.565425	1.03458	1.0147	2.10653	2.59551	1.66333	-0.226934	0.101068	0.201146	0.426852	-1.30089	-0.439114	0.0581255	-0.434351	-0.353665	-0.567833	0.188844	0.00825022
31468	SNRK	H200006609	0.143302	0.132503	1.36972	1.50509	1.68481	1.62918	0.564246	0.547383	0.853817	-0.899612	-0.774316	-1.2792	0.233832	0.0443197	0.0262633	-1.81223	-1.75295	-1.56177	0.625872	-1.00632	0.518169	-0.391888	-0.414566	-0.878204	0.309789	0.13868	0.444077
5366	opHsV0400009202	opHsV0400009202	-0.27793	1.03033	-0.14935	-1.88252	-1.06424	-1.52081	-1.72139	-1.01484	-2.68509	1.05633	0.677268	1.07831	0.637441	0.569416	0.472097	0.524671	0.266501	0.51637	-0.11413	0.851795	0.505744	0.652606	0.579038	0.561554	-0.148838	0.112377	0.487294
31863	SSR2	H200005959	0.236226	1.16719	-0.454299	1.99542	2.26291	2.31759	0.387925	0.506994	0.80176	-0.454014	-0.0601968	-0.985545	0.0195289	-0.126832	-0.0134788	-0.448355	-0.380553	-0.669643	-0.0298031	-0.673777	-1.85706	-0.836077	-0.818787	-1.17697	-0.319148	-0.0883795	-0.302621
31503	SNX12	opHsV0400011008	-0.497355	0.193305	-0.0416675	1.38644	1.75927	1.53493	0.32361	0.701997	0.939547	-1.16816	-1.39248	-1.10487	-1.27486	-1.27701	-0.915813	-0.771435	-0.819568	-0.446091	-0.992092	0.60665	-0.170591	-0.0477169	0.0178148	0.306794	0.569886	0.382663	2.19678
33412	TRAPPC4	H300012695	0.687367	0.755785	-0.132625	2.96102	2.16475	0.490388	0.538004	0.734707	0.619077	-0.00181101	0.216296	-0.274806	0.174216	0.0351407	-0.390883	-0.47297	-0.306525	-0.614694	-1.02469	-0.29229	-0.950328	-1.34564	-1.64594	-1.5337	-0.306305	0.0626839	-0.14622
18218	GRID2	H300003971	-1.82367	0.863717	-0.511294	-2.18667	-1.35353	-1.0402	-0.958223	-1.57862	-0.604334	0.32248	-0.331648	0.977843	-0.380179	1.81006	0.575416	-0.154426	-0.14983	0.303374	0.376706	0.407436	0.757018	0.949169	1.32324	0.826314	0.622384	0.286482	0.670981
19640	INMT	opHsV0400006226	-0.60584	-0.845997	-0.202181	0.618263	0.409255	0.21339	-0.00074045	0.16463	-0.422463	1.42505	1.98127	1.66391	1.71394	1.61917	0.502455	0.0920181	-0.686561	0.129411	-1.19958	0.144569	-1.14578	-0.672858	-1.1157	-1.1479	-0.623015	-0.352874	-1.65584
19654	INPPL1	H200006078	-0.787746	0.283407	0.450734	0.173053	0.257048	-0.147531	0.386596	0.371356	0.507807	-1.46791	-1.15426	-1.46608	-1.69984	-2.05689	-2.03769	0.0884465	0.69745	0.327433	0.842963	-0.114614	0.843268	0.995854	1.13931	0.908525	0.941144	0.932652	0.785514
1270	H300008699	H300008699	-0.0215805	0.457281	0.103741	-2.14742	-1.42399	-1.34209	-0.839469	-1.73336	-1.84984	0.149643	0.463182	-0.120206	-0.0854028	-0.546916	0.318616	-0.0637281	0.819754	0.635517	1.33476	1.54464	0.906439	0.280274	-0.213391	0.43437	1.00614	0.588112	1.34493
35058	ZMIZ1	opHsV0400005598	-0.580681	-0.845643	-0.0551857	-0.823452	-0.189958	-0.663564	0.23519	-0.00145794	0.3254	-1.20261	-0.641257	0.0886621	-1.41495	-1.87734	-1.4843	-0.113937	0.0449162	0.0923777	-0.472604	0.985667	0.756235	1.56235	1.78219	2.12168	1.01718	0.384138	0.970965
28031	Q86X61_HUMAN	opHsV0400002777	0.923966	1.19858	-0.100101	-1.50811	-0.750093	-0.634183	-0.742144	-0.805115	-0.437713	1.12001	1.44412	1.11003	1.93981	1.71073	1.13776	0.286305	-0.145167	0.564799	0.427379	-0.565354	-0.704814	-1.04878	-0.776897	-0.930672	-0.870304	-1.10285	-0.741204
33208	TNFSF15	opHsV0400000955	-0.750977	-0.932521	1.04462	-0.00701938	0.365028	0.489635	-0.738568	-1.46617	-2.04362	-0.621053	-1.46018	-1.01457	-0.633436	-0.64226	-0.66844	-0.554517	-0.0355826	0.314964	0.752255	1.7044	0.335487	1.22362	1.21328	1.38966	0.757293	0.991868	0.98679
1745	H300015906	H300015906	0.747704	0.56307	-0.0577373	0.0473376	0.305175	-0.203685	0.553317	1.3655	1.57277	-0.506854	0.0241596	-0.554794	-1.26575	-1.06329	-0.610673	-2.76521	-0.789174	-1.84922	-0.135528	0.724075	0.948508	0.296147	1.40062	0.11288	0.846983	0.744588	-0.450915
8662	opHsV0400012927	opHsV0400012927	0.0245975	-0.345598	1.29955	0.730662	-0.01636	0.713866	0.660315	-0.14354	0.29117	-1.95423	-0.820465	-0.86886	-1.36168	-2.64354	-1.7272	0.301366	0.278948	-0.446694	0.682958	1.4776	0.350457	0.916403	0.796524	0.620056	0.418278	0.564173	0.201248
13901	CFLAR	H300021778	-0.0563858	0.686002	1.78612	1.6863	1.52181	1.08754	0.198695	0.144896	0.468013	-1.7506	-1.57986	-1.76633	-0.584727	-1.26491	-0.270701	-0.562819	-0.221608	-0.617714	0.294957	1.68645	0.0590452	-0.398134	-0.955615	-0.200989	0.412441	-0.0325645	0.230693
32067	STX8	opHsV0400000811	0.44929	0.525711	1.01368	1.99047	1.36675	1.35952	0.46115	0.41578	0.582922	-0.563291	-2.32648	-2.13281	-0.327598	-0.343202	-0.275377	-0.516802	-0.812981	-0.78929	-0.809117	1.15269	0.339831	-1.04673	-0.214959	-0.558127	0.221352	0.481844	0.355776
19734	IRF2	H200007064	-1.65532	-0.206166	0.869241	1.08088	1.54277	1.80714	0.0257223	0.162211	0.310995	-1.25185	-1.26748	-1.03207	-0.868437	-1.13673	-0.505547	-1.39041	-0.922626	-0.970992	0.188087	1.10988	-0.200558	1.35303	0.457524	0.434804	0.278839	1.04326	0.743809
19041	hsa-mir-138-1	opHsV0400013305	-0.637949	0.262992	-0.662918	-2.24843	-2.00355	-1.99191	-0.513358	-0.209415	-0.0925467	1.81681	1.15889	1.51548	1.08316	1.39973	0.712284	0.128761	0.0786127	0.263982	0.875169	-0.14388	-0.290553	0.00790606	-0.346024	-0.240125	0.0260488	-0.0372184	0.0880466
23437	NP_001002848.1	H300015238	-1.22827	-0.227402	-0.868473	-0.873977	-0.605549	0.0459847	-0.509549	-1.01494	-0.732495	0.991242	2.07622	2.21076	1.60461	2.13899	0.691671	0.047433	-0.49798	-0.0161393	0.516885	-0.102002	-0.189789	-1.0799	-0.489246	-0.450797	-0.486703	-0.308341	-0.642239
13679	CDH1	H300019607	1.66998	-0.562237	0.128113	-0.677326	-1.45693	-1.35461	-0.560723	-0.618296	-0.706346	1.87345	1.46878	0.727513	1.16886	0.310695	1.28192	1.06442	0.445419	1.02341	-1.9747	-0.140008	-0.678323	-0.446105	-0.675593	-0.305022	-0.357574	-0.0799549	-0.568805
27499	Q3SXP8_HUMAN	H300006692	-1.03404	0.152391	-1.83439	-2.49127	-0.524859	-1.27161	-0.282473	-1.26293	-0.361373	1.07496	1.21975	1.57398	0.656666	1.77154	1.27207	-0.294414	0.0437501	-0.309973	0.223749	0.301739	-0.303357	0.452017	0.385258	0.692302	0.126534	0.19047	-0.166496
25782	PCNXL2	H300022586	-0.648017	1.05501	0.591421	0.973476	1.34637	1.01269	0.134096	0.370655	-0.23468	-1.59729	-1.13622	-1.66668	-0.747582	-1.94581	-1.38225	-0.0831825	-0.466202	-0.359798	1.079	0.699652	1.04432	-1.14166	0.295797	0.142182	0.41507	1.25369	0.995949
4452	opHsV0400007991	opHsV0400007991	0.242149	0.132561	1.27708	-1.60979	-1.60048	-1.71517	-0.325346	-0.423991	-0.345753	-0.949619	-0.821451	-0.481305	-0.711637	-0.745852	-0.800871	-0.261395	0.0307251	-0.269509	0.508938	0.161934	1.84348	0.783173	0.993424	1.16509	0.847445	1.38348	1.6927
21408	LRPPRC	H200008596	1.46992	0.109349	0.850037	2.02834	2.20593	1.54756	0.244936	0.528661	-0.163095	-0.784317	0.18502	-0.520533	0.359855	0.323101	0.0913932	-0.58704	-0.177117	-0.521231	-0.43711	-2.605	-0.444017	-0.561214	-0.627426	-0.702484	-0.554065	-0.433787	-0.825666
14641	CRIM1	H200002810	0.638691	0.263416	-2.32995	0.369142	0.232535	0.392072	0.087081	-0.016717	0.450382	-0.91022	-0.739935	-1.31567	-0.490422	-0.590882	-0.469462	-1.21879	-1.17347	-1.26403	1.35836	2.11893	1.13505	0.0888704	0.155619	0.0847746	1.34778	1.08345	0.713395
19451	IGSF6	H200013157	-0.663149	0.506004	2.63432	-0.306159	0.398497	0.497346	-0.0973892	-0.312259	0.563665	-1.63386	-1.65137	-1.12289	-1.32813	-1.57372	-1.13842	-0.0988907	-0.220677	-0.479427	0.810183	1.42955	0.313325	0.747985	0.604485	0.497267	0.742888	0.59463	0.286208
20289	KIAA1468	H300015839	-0.136322	0.0072542	-1.15547	1.77557	0.998321	1.61119	0.0701136	1.52449	0.594874	-1.00706	-0.969309	-1.14718	0.0428467	-1.20611	-0.420772	-1.7355	-1.39837	-1.52088	0.418774	-0.145353	0.276014	-0.00433981	1.12038	0.523516	0.732492	0.704982	0.445857
22919	NAV2	H300021084	0.701638	0.0272489	-1.84824	0.523976	0.486467	0.143239	-0.350014	0.0222306	-0.275813	1.71997	1.7067	1.83756	0.939215	1.4141	0.929909	-0.0100042	-0.169025	0.0323811	-0.887287	0.115558	-1.49091	-0.892542	-1.20987	-0.724701	-0.954942	-0.990389	-0.796444
33477	TRIM23	H200019344	0.494258	0.802301	-1.24795	-2.24234	-1.38997	-1.85745	-1.14782	-1.99263	-0.807559	-0.254242	0.809456	0.890531	0.784246	0.428564	0.0460762	0.595274	0.899248	0.529926	0.941863	0.0839232	0.343212	0.867487	0.592283	0.739603	0.673637	-0.139608	0.557694
13539	CD320	H300016772	-0.723241	-0.522362	0.16989	-2.28831	-2.3588	-2.42201	-0.002077	-0.197054	0.26463	0.7634	0.89609	1.40527	0.805151	1.01348	0.629706	0.423268	1.05555	1.19138	0.363287	-0.0582713	-0.122898	0.158849	-0.145102	0.0319876	-0.0679597	-0.22544	-0.0384053
11319	BEST1	H200008622	-0.938446	-0.442633	1.30435	1.69098	1.48658	2.28956	0.149641	0.177693	-0.0685142	-0.668231	-1.50095	-1.19996	-0.957803	-0.904423	-0.707542	-1.03111	-1.37535	-0.975176	-0.0444392	0.71859	0.90348	-0.122227	0.561381	0.691211	0.601519	0.205167	0.156647
8623	opHsV0400012886	opHsV0400012886	-0.975677	0.502511	-0.128715	-0.535339	-0.38004	0.641364	-1.24978	-1.05429	-0.408695	1.30525	1.80942	1.94593	1.37699	1.88597	1.27168	-0.231515	0.137995	-0.192134	-0.445463	-0.0356322	-0.977349	-0.577623	-0.52576	-0.64523	-0.097503	-1.35283	-1.06353
15247	DDIT4	H200011743	-0.378941	0.140666	-1.20545	-2.07519	-1.74144	-2.21508	-0.130782	-0.326294	0.397747	0.306844	1.23181	0.972304	0.574155	0.143451	0.463416	1.6732	1.59605	1.66095	-0.256281	-0.202822	-0.605201	-0.110127	0.271479	-0.037933	-0.0621074	0.132052	-0.216487
20590	KRAS	opHsV0400009466	-0.351593	0.354922	-0.286294	-2.86089	-2.45491	-1.63626	-0.715013	-0.795819	-0.0928865	0.388799	0.77234	0.867109	1.46114	1.01267	0.55747	0.668237	0.61406	0.827006	0.448522	0.292487	0.206945	-0.410736	-0.152217	-0.0394601	0.560557	0.480479	0.283327
9786	ADAM15	H300020237	-1.17545	-1.47711	-1.07504	0.333622	-0.127882	-2.24052	-0.851251	-1.33306	-0.731708	1.16645	1.46323	1.31579	0.0503031	-0.036499	0.143581	0.912187	1.06918	1.36419	-0.949947	-0.31197	0.444857	0.569808	0.960353	1.10189	-0.421789	-0.357684	0.194487
28879	Q9P168_HUMAN	H300005806	0.793312	-0.675388	1.93027	-0.253771	0.313692	-0.265813	0.487904	0.261692	-0.0741735	-1.51787	-1.95422	-1.55172	-1.21738	-1.06205	-1.15359	-0.165198	-0.31689	-0.15608	0.151701	-0.278304	1.84257	0.634098	1.29179	0.937089	0.350974	1.04161	0.605754
16210	ELMO3	H200011402	-2.49705	0.346892	-0.503617	-1.07645	-0.106117	0.0162392	-0.643612	-0.540986	0.13408	0.922552	2.19179	1.21548	0.805792	0.556929	0.998333	1.40467	-0.129399	1.42394	-0.614216	-0.0814674	-1.06704	0.638261	-0.978226	-0.426779	-0.682708	-0.648882	-0.658413
18153	GPR89_HUMAN	H300016199	1.10594	0.781214	0.531704	2.16814	1.48533	2.48296	-0.201551	0.331937	-0.159594	0.105479	-0.554504	-0.671446	-0.495515	0.579165	-0.097249	0.0461081	0.337095	-0.100152	-0.221033	-2.11937	-1.16934	-0.48745	-0.601746	-1.00943	-0.896158	-0.325414	-0.845118
32548	TEAD1	H300019821	0.320503	0.111561	-1.71173	0.480839	-0.549684	-0.462502	-0.284349	0.159773	-0.366828	0.797182	1.61079	1.95948	1.94578	1.50367	0.640442	0.262899	-0.319417	0.636231	-1.16578	0.558325	-1.32463	-0.433782	-0.951673	-0.771657	-1.04963	-0.365508	-1.23031
6220	opHsV0400010169	opHsV0400010169	0.623247	-1.4999	-0.368335	-2.16076	-1.58037	-1.50531	-0.773878	-0.630627	-0.380444	1.04539	1.12207	0.785582	0.907805	1.19836	1.43158	0.497417	0.685455	0.310261	1.80791	-0.354028	-0.375917	-0.221772	-0.899133	-0.220468	0.197108	0.0908	0.267964
32209	SYNJ2BP	H200007976	0.0822263	0.607842	0.662617	2.90469	2.47811	1.31258	0.334858	0.432812	0.404057	-0.390212	-0.56189	-0.560628	0.410773	-0.75984	-0.2713	-0.22191	-0.142766	-0.558386	-0.314304	0.445518	-1.23032	-0.945389	-0.659535	-1.10327	-0.644133	-0.540031	-1.17217
721	H300001672	H300001672	-0.661863	0.00145578	-1.04004	0.806073	0.452074	-0.0198473	-0.456506	-0.156464	-0.216562	1.92957	1.73489	1.89435	0.266852	0.761715	-0.19388	1.07272	-0.0354589	1.27221	-0.884749	0.494473	-1.54886	-0.356612	-1.10338	-0.51965	-1.01755	-1.6989	-0.776061
32280	TAF1B	H200012277	2.69649	-0.0575493	-0.0377037	0.840311	0.954025	2.44941	1.07302	0.444575	0.937613	-1.39039	-0.157204	-1.23154	-0.728843	-0.421396	0.073347	-1.05985	-0.0327499	-0.841771	-0.179371	-0.233816	0.443987	-0.190418	-0.719572	-0.406882	-1.0062	-0.383752	-0.833789
22614	MTIF3	opHsV0400000147	0.51997	0.516112	0.124339	2.36734	2.01636	1.78302	-0.0699953	0.66165	0.495497	-1.1799	-1.83371	-1.63583	-0.956869	-0.567698	-0.768809	-0.0366802	0.131944	-0.975669	-0.541831	0.508861	0.342655	-0.246058	0.49288	0.206186	-0.41134	-0.311612	-0.630825
18713	HIST1H2BK	H300000318	-0.118332	-0.168917	-0.790693	-0.545478	0.251378	-0.18355	-1.92987	-1.9017	-1.60131	1.07631	1.0133	1.66679	1.37396	2.01408	0.27671	0.61722	0.615866	0.276136	0.743401	-0.855289	0.282988	-0.340072	0.149067	0.249054	-0.599608	-0.949408	-0.622039
1601	H300013557	H300013557	-1.90963	1.20058	-0.998918	-0.641918	-0.748068	0.0507229	-0.154226	-0.901124	-0.330808	1.12482	0.769883	1.94789	0.914354	1.32114	0.530287	1.21977	0.579328	0.981402	1.06521	-1.08118	-1.20307	-0.71385	-1.09811	-0.692217	-0.0156544	-0.668509	-0.548092
24574	NPTX2	H200000769	0.472948	0.812177	-0.0215843	2.8475	1.60224	2.07653	0.424844	0.328637	0.41564	-0.54987	-0.62979	-0.451258	-1.08674	-0.773974	-1.31752	-0.894162	-0.897504	-0.326271	0.494195	-1.69877	-0.305631	0.034079	-0.161601	-0.0733714	0.064675	-0.51124	0.125826
28327	Q8NB05_HUMAN	H300010326	0.17151	-0.348847	2.88845	1.23925	0.99489	1.26339	1.00248	0.180306	0.0371868	-0.775592	-1.04805	-0.825593	-1.14645	-0.815753	-0.500137	-1.08144	-1.52023	-0.981583	-1.19961	0.77928	0.358593	-0.149086	0.845071	0.231164	0.552229	-0.140704	-0.0107216
1398	H300010416	H300010416	-1.01325	-0.393373	-0.344783	-1.00016	-0.864204	-1.13612	-0.311043	-0.388677	-0.158366	1.07817	1.41233	1.97082	1.50969	2.86518	1.11895	-0.231876	-0.204301	-0.187739	-0.1507	-0.847063	-0.769417	0.275848	-0.59619	-0.256574	-0.472214	-0.537324	-0.367605
20814	LASS6	H200011112	-0.218026	-0.374028	-0.24554	2.4638	2.06152	1.76885	0.299853	0.832757	0.685193	-0.965739	-0.717579	-1.74922	-0.820167	-1.08984	-1.22084	-0.803885	-0.870133	-0.548672	-0.261052	0.172378	-0.662819	0.42456	0.174822	0.240135	0.417531	0.475052	0.531091
26372	PLD2	H200011308	-0.517863	-0.0873423	-0.930065	0.0280375	0.0917044	-0.300278	-2.04141	-2.385	-2.31904	-0.206434	-0.0181042	0.171204	-0.292752	-0.399612	0.0222597	0.521942	0.140172	0.755162	0.885184	1.65843	1.29688	0.653051	0.95249	0.954313	0.7305	0.0451163	0.591462
17945	GNPDA1	H200017294	-0.297246	0.205327	0.868816	2.34074	2.40397	2.19722	0.504423	0.405225	0.533575	-0.689671	-0.819034	-0.684225	-0.961728	-1.06722	-0.79655	-0.503617	-0.345029	-0.518285	0.00468268	0.382357	-1.10405	-1.00804	-0.614018	-0.729307	0.15292	0.22414	-0.0853766
16408	ERGIC2	H300018566	1.77308	0.549975	-0.424188	2.33835	2.05179	2.0911	0.203133	0.414594	0.261084	-0.644489	-0.955533	-0.940164	0.445144	-0.152031	-0.325708	-0.121711	0.0393312	-0.58953	-0.261765	-0.197696	-0.985075	-0.617052	-0.355585	-0.706719	-1.12353	-0.543727	-1.22307
11074	AUH	H200006860	0.601959	-0.104251	1.93128	0.163782	0.805807	1.43048	-0.578464	-0.282869	0.311468	-0.945067	-1.31864	-1.42759	-0.567448	-0.0761657	-0.293875	-1.8066	-1.46128	-1.48774	0.0911276	-0.67643	1.12724	0.316346	0.997164	1.10489	0.277298	0.717413	1.15017
33865	TXNL4A	H300016316	-0.885154	0.295597	-1.10369	-2.04624	-1.59649	-1.8539	-0.52931	-0.626579	-0.315038	1.13627	1.51919	1.92043	1.05979	1.46127	0.611897	0.109638	-0.220438	-0.110747	1.29072	-0.239151	0.170608	-0.380426	-0.0846287	-0.0154565	0.162823	0.0786514	0.190363
32922	TMEM126B	H300008388	1.38718	0.375942	0.34027	2.40108	1.63947	1.91294	0.0503053	0.826376	0.127852	-0.789779	-0.832101	-1.31898	1.11085	0.254741	0.577062	-0.333996	-0.262182	-0.781401	-0.177218	-0.866618	-0.831696	-1.02189	-0.806858	-0.697735	-0.824236	-0.479394	-0.979978
17549	GALNT3	H200017324	0.524546	-0.0229633	0.881434	1.22441	0.475356	1.02693	0.218574	0.280857	0.217556	-0.425824	-0.353732	-0.408818	-0.732714	-1.16743	-0.425774	-1.59762	-0.632136	-3.65229	0.555141	0.44455	0.795886	0.722026	0.885508	0.776943	-0.0477334	0.190327	0.246995
18563	HEBP2	H300018051	2.1188	0.657794	-0.520048	0.965766	0.676556	1.25129	0.302119	0.224888	0.214644	0.163176	0.406583	0.144286	0.528791	0.602246	0.877569	0.224208	0.276508	0.171174	-3.11402	-0.715012	0.10158	-1.06772	-1.08033	-1.40617	-0.51405	-0.701521	-0.789098
21962	MCM4	H200013972	0.276109	-0.473767	0.324206	0.830904	0.0170627	0.728482	-0.0622012	0.751596	-0.305651	1.50205	1.69884	1.6469	0.132994	0.922843	-0.288458	0.480076	0.483567	0.31353	-0.500767	-2.95844	-0.78248	-0.622163	-0.33037	-0.403959	-1.38934	-0.719444	-1.27213
31144	SLC39A11	H200000782	-0.118086	0.0676981	1.70247	1.9808	1.49074	2.25433	0.284767	0.142613	0.691438	-0.62518	-1.14959	-1.25086	-0.994859	-0.690808	-0.722696	-0.737464	-0.85126	-0.703527	-0.481513	1.64447	0.0221401	-0.785247	-0.518169	-0.575201	0.091417	-0.272346	0.103929
18697	HIST1H2AI	H300002874	-0.284594	-0.174681	-0.756123	0.919338	0.908596	1.09055	-0.468333	-0.496868	-0.259958	1.12844	0.783289	1.30371	0.986436	0.638295	0.356057	0.974148	0.633973	1.08526	-2.82846	-0.00247097	-1.94312	-0.359901	-1.10174	-0.69282	-0.39726	-0.539984	-0.501782
19253	IARS2	H300021189	0.423865	-0.0440664	0.750205	2.63904	2.06179	2.17333	-0.397628	0.615011	0.184199	0.0377451	-0.199981	-0.386186	0.0192959	0.327891	-0.158367	-0.248664	0.0463454	0.00031414	-0.20861	-0.300928	-1.16156	-1.28592	-1.33813	-1.26815	-0.587768	-0.995725	-0.69735
16892	FAT3	opHsV0400005733	1.55515	1.00981	0.710057	-0.0242881	-0.00785975	0.3433	0.451938	1.04305	-0.448634	0.95927	0.802669	1.13254	0.831704	0.444031	1.28377	-0.123033	-0.254877	-0.310217	-0.866275	-2.83033	-0.821861	0.0869632	-1.27833	-1.3238	-1.03188	-0.441282	-0.891589
22460	MRPL44	H200014959	1.23025	0.571956	0.522705	1.27873	2.55471	2.42476	0.572677	-0.322725	0.550245	-0.954519	-1.08169	-1.12434	-0.739618	-0.686629	-0.39454	0.113672	0.246763	0.403803	-0.095327	-0.149935	-0.891065	-0.829877	-0.642354	-0.723295	-0.240915	-1.33345	-0.259991
25765	PCK1	H300019066	-0.492299	0.402279	-0.211185	-2.34455	-1.81785	-1.71074	-0.317576	-0.200328	-0.110142	0.793369	1.85115	1.56954	1.16135	1.62536	0.778937	0.447176	0.0914064	0.700398	-0.0334181	0.0416571	-1.20408	-0.0710703	-0.302342	0.0190588	-0.544674	-0.0425233	-0.0789085
26882	PRB3	H300019017	-0.132178	0.929628	0.992334	0.23886	0.516384	0.0899396	-0.384135	-0.40519	-0.243183	1.45069	1.10404	1.72301	1.55071	1.16985	0.111691	0.400339	-0.532217	0.242554	-0.929849	0.712225	-0.857986	-1.92408	-1.44233	-1.24956	-0.756725	-1.1312	-1.24362
16917	FBXL11	H200015214	-0.307272	0.352451	0.41725	1.87941	2.6052	1.98233	0.481727	0.591454	0.637588	-0.728806	-1.09619	-2.04602	-0.256606	-0.691907	-0.0310813	-1.0736	-0.803501	-0.80284	0.313317	0.0553659	-0.773105	-0.397005	-0.603191	-0.293319	0.13826	0.358976	0.0911064
8996	opHsV0400013281	opHsV0400013281	-0.444534	-0.272347	0.820797	-0.201449	0.260747	0.52048	-1.1833	-0.992966	-0.750747	1.20141	1.23994	1.9261	1.37802	1.60473	1.28802	-0.040481	-0.0706519	0.501893	-0.164549	0.0799946	-0.950998	-1.88948	-1.30303	-1.41205	-0.441866	-0.364773	-0.338897
28160	Q8N666_HUMAN	H300001344	0.0268032	0.26585	-2.35222	-2.82403	-0.540382	-1.46337	-0.112263	-1.7021	-0.700357	0.509379	0.606834	0.705618	0.120464	0.771198	0.0733171	0.755707	0.884016	0.234122	0.590844	-0.168849	0.441135	0.697673	0.738398	0.8334	0.448624	0.215361	0.944841
17859	GLUL	H200007913	0.072645	0.186183	1.91078	2.08824	1.74923	1.92669	0.226469	0.259029	0.570099	-0.807856	-1.01147	-0.9648	-1.12333	-1.76602	-0.807399	-0.197058	-0.100325	-0.104359	-0.351995	1.13515	-0.873503	-0.381601	-0.600751	-0.424513	-0.0283215	-0.322369	-0.258851
18524	HCP5	H200000472	-1.26054	-0.424164	1.69201	1.34584	1.3973	1.53655	0.629069	0.241775	0.528692	-1.14837	-1.71001	-1.1765	-1.02315	-1.31839	-0.706115	-0.742736	-0.842634	-0.660896	-0.203947	1.66582	0.47907	-0.155378	0.248757	0.124401	0.514127	0.3872	0.58222
13943	CHD3	opHsV0400005151	-0.119929	0.548593	-1.02255	-2.10817	-2.01397	-1.46305	-1.18046	-1.17504	-0.788344	1.29436	1.47464	0.817268	-0.188422	0.678057	-0.173789	0.522277	0.596034	0.703097	1.78963	-0.428986	-0.108735	0.499632	0.165792	0.365536	0.324806	0.373221	0.618506
31222	SLC6A18	H300008764	-1.26933	0.345498	0.669118	0.452372	-0.0679757	0.55853	-0.478096	-0.626732	-0.32933	1.32932	0.911148	1.33998	0.970472	1.74749	0.587598	-0.0606328	0.649652	1.01583	0.134695	0.64401	-1.60231	-0.593937	-0.849666	-0.880643	-1.04906	-1.51485	-2.03313
15724	DOPEY2	H200012853	-0.489232	0.138202	2.39103	1.64539	2.07015	1.59076	0.195141	0.414503	0.164458	-0.711025	-1.58437	-1.17597	-0.822931	-0.900402	-0.343962	-0.909517	-0.774747	-0.943559	-0.0537913	1.19708	-0.198637	-0.227117	0.0474718	0.0673711	-0.109019	-0.627252	-0.0500184
21263	LOC651746	opHsV0400009099	-1.65605	-0.23776	-0.629647	-2.15749	-1.46645	-1.4984	-0.0170312	-0.242265	-0.0107318	0.997184	1.41749	1.69665	1.08549	1.75744	1.33946	-0.0288164	-0.0699864	0.15996	0.897461	-0.249641	-0.44845	0.463615	0.00117797	-0.455945	-0.0531945	-0.454116	-0.139972
29169	RALGPS1	H300019463	-0.00117845	0.221134	0.297139	-1.40585	-2.38574	-1.27795	-0.731377	-0.568421	-1.42533	1.21394	0.877461	1.41979	1.31742	0.708129	0.239483	0.857351	1.34201	0.821666	0.765289	0.891677	-0.425572	-0.490851	-0.561272	-1.22494	0.0291377	-0.535477	0.0323261
24418	NP_976327.1	H300004020	-0.886607	0.750529	-0.0769744	-2.80877	-1.92196	-1.5747	-0.800006	-1.20346	-0.769806	1.18515	1.13618	0.393102	0.762258	0.924261	0.622996	0.144878	0.0579322	0.677429	0.592944	1.11053	0.612156	-0.0455968	-0.169999	-0.0712591	0.599585	0.154973	0.60424
656	H300000925	H300000925	-0.390703	0.0610625	-0.271661	-1.58794	-1.6333	-1.56962	-0.466989	-0.844576	-0.296399	0.433877	1.77532	1.09481	0.8305	-0.570891	0.0974633	1.73389	1.88926	1.65501	0.34721	-1.22893	-0.0908891	-0.607653	0.117962	-0.00472303	0.0835069	-0.144457	-0.411138
2512	opHsV0400002603	opHsV0400002603	0.114453	0.171569	0.425963	1.7402	1.73573	1.61553	0.120078	0.28591	-0.0391648	1.00942	1.23016	1.57597	-0.279632	0.344727	-0.428234	-0.177809	-0.00747865	-0.205466	-0.0686798	-1.62054	-0.660549	-1.60776	-1.41843	-1.20917	-0.962255	-0.634576	-1.04996
12750	C6orf85	H200002906	0.259504	-0.618511	0.487814	0.454903	-0.497887	-0.933723	1.03677	-0.240859	0.537776	-1.05916	-0.996104	-1.49749	-1.44682	-1.18266	-1.35704	-1.05082	-0.370974	0.58426	-0.734393	0.489141	1.3211	0.598033	0.823317	0.778515	1.4645	1.48578	1.66503
9942	AFP	H200014070	0.795327	0.70777	-0.5204	-1.44915	-1.64356	-2.26155	0.0505449	-0.199983	-0.186107	0.59809	1.56495	0.798654	1.31829	1.38392	0.405419	1.215	0.95008	1.17053	-0.390005	-0.166374	-1.34115	-0.475069	-0.648655	-0.791148	-0.506074	-0.11039	-0.268965
9596	ABHD8	H200018947	-0.79717	0.530231	0.893784	0.901874	1.0054	-0.464237	-0.201543	-0.362564	0.020443	-0.541181	-1.39886	-0.615185	0.206591	0.0915765	-1.04494	-1.62386	-2.07558	-1.79898	1.08069	-0.208788	1.08113	1.10909	1.1809	1.50699	0.643327	0.295371	0.585497
21402	LRP4	opHsV0400007059	-0.125189	-0.374349	-2.00698	0.0521711	1.07276	0.44388	0.434938	-0.188023	-0.162816	1.65567	1.38425	1.53472	1.19991	0.70185	1.24219	0.303354	-0.106955	0.624022	-0.225619	0.330522	-0.989919	-0.698779	-1.06351	-1.36599	-1.16371	-1.02183	-1.48657
13468	CCR10	H200017286	-1.12569	-0.559215	-0.316431	-2.30963	-1.54471	-0.524587	0.14372	-0.11451	0.715616	-0.835683	-0.648423	-0.295264	-0.749321	0.152752	-0.767722	0.337887	-0.462286	-0.43674	0.622383	-0.0254846	0.711491	0.957227	1.1053	0.670543	1.81212	1.87666	1.61
8388	opHsV0400012611	opHsV0400012611	-0.30897	-0.418891	-0.793475	-1.14663	-0.884432	-1.35817	-2.82578	0.542603	-2.17757	0.661192	0.356127	0.302072	1.00986	0.239572	1.81715	0.627996	0.4689	-0.0910497	0.099768	0.84821	0.0352188	0.940771	0.499037	0.308926	0.433574	0.403063	0.410944
17065	FEZ2	H200011240	-0.145721	0.777506	0.794299	2.04232	1.96698	2.16882	0.0902027	-0.0828951	0.295407	-1.70792	-1.41131	-1.73366	-0.680795	-1.27536	-0.528487	-0.390923	-0.0949774	-0.543204	0.388815	0.376774	0.581177	-0.326968	-0.248466	-0.551134	0.134483	0.174351	-0.0693203
804	H300002629	H300002629	0.920807	0.488786	-0.955094	1.71138	2.16096	1.5796	0.0283922	0.182871	0.290004	0.935895	0.39248	0.567769	-0.209996	0.636795	-0.535849	0.501201	0.0163714	0.456255	-0.768259	0.103945	-1.51805	-1.38173	-1.35454	-1.27179	-0.958005	-1.09649	-0.923713
4133	opHsV0400007625	opHsV0400007625	0.148645	-0.715903	-0.48981	-1.58815	-1.75066	-1.40022	-0.824404	0.0270043	-0.688708	1.10097	0.929916	0.950207	0.166719	3.36792	0.557914	0.530187	0.472162	0.72321	0.0223526	-0.15942	-0.583139	0.0307218	-0.343367	-0.431292	0.0207775	-0.32002	0.246394
35315	ZNF383	H300010680	0.0474888	0.156528	1.23899	0.537205	-0.305456	0.53795	0.415651	-0.146955	0.182605	-1.76319	-2.08127	-1.53377	-1.4987	-0.942966	-1.09131	-0.0416644	0.127026	-0.320496	-0.78122	0.742398	1.57527	0.981306	1.46291	1.07831	0.899355	0.733445	-0.209445
12644	C6orf107	opHsV0400010423	2.1508	-0.119496	1.37912	1.71381	1.37086	0.831403	0.591561	0.824926	0.553906	-0.41182	-0.659526	-1.08394	0.00364137	-0.0663995	0.430364	-0.675777	-0.54849	-0.384422	-2.84091	-0.433578	-0.0121514	-0.646911	-0.691528	-0.669377	-0.20713	-0.278023	-0.120922
21544	LSMD1	opHsV0400002681	-0.932956	0.315007	-0.0979735	-0.442833	-0.425904	0.00540674	-0.665188	-0.237851	-0.622634	1.60618	1.76358	2.35326	1.19863	1.66508	0.761517	-0.114097	-0.0936681	0.103753	0.10682	0.0603022	-1.8674	-0.143725	-1.47211	-0.732644	-0.8217	-0.640431	-0.628403
27818	Q6ZQP8_HUMAN	opHsV0400003427	0.825603	0.915919	0.73788	-0.294384	0.0873966	1.27568	0.056951	0.120127	0.279756	0.0658338	-0.580904	0.0176934	-0.156524	-1.59123	-2.019	-0.468235	-2.25731	-2.38629	1.21407	0.583106	0.0959066	1.01122	0.56566	0.673502	0.435209	0.469375	0.322992
13384	CCDC90B	H200014011	1.33101	0.486689	-0.380731	2.14221	2.07572	2.09859	0.503212	0.50588	0.612726	-0.842746	-1.41074	-1.04176	0.0783541	-1.09309	-0.659745	-0.496229	0.228487	-0.140416	-0.62615	0.74548	-1.04614	-0.241285	-0.259072	-0.620133	-0.774346	-0.391378	-0.784397
11009	ATP6V0E1	H200003390	0.164131	0.73657	0.621203	2.01193	2.10278	1.43101	0.73423	0.758709	0.740993	-0.597501	-1.34935	-1.08478	0.111435	-0.275045	0.0980149	0.0214727	-0.147643	-0.192327	-2.28155	0.571885	-0.82943	-1.23568	-1.01422	-0.718765	-0.0374593	-0.167991	-0.17261
10982	ATP5F1	opHsV0400001665	0.365509	0.318773	1.13202	2.14959	2.33026	2.2413	0.177676	0.234803	0.224793	-0.554009	-0.980865	-1.03687	0.471375	0.0755751	0.556131	-0.529535	-0.336366	-0.44089	-0.348767	-0.141461	-0.85045	-1.17006	-1.11751	-1.20626	-0.40964	-0.455554	-0.699568
17714	GFPT1	H200000437	1.33212	0.229254	-0.0737793	2.22149	1.35044	2.28292	0.859419	0.692912	0.51528	-0.609984	-0.0558946	-1.49515	-0.445238	0.188574	-0.0441486	-0.892344	-0.589989	-0.700953	-0.610155	1.01353	-0.957697	-1.0537	-1.0233	-1.07917	-0.510433	0.0308242	-0.574826
32608	TFDP3	opHsV0400001448	-0.51207	0.536594	-0.612168	-0.501142	0.101854	-0.127334	1.83192	1.20822	-0.125727	0.570451	0.986339	1.35401	0.255522	1.47839	-0.528454	1.17725	0.710222	1.09543	0.0509197	-1.38704	-1.429	-1.62945	-0.996277	-1.39751	-0.987247	-0.700587	-0.423103
13802	CELSR3	H300018579	-0.218242	-0.946606	-0.690249	-1.22112	-0.443073	-2.0996	-0.905981	-1.64172	-0.881611	-0.7668	0.640991	1.83756	-0.114411	0.402319	-0.398174	0.378681	-0.00427802	0.308647	2.11302	0.708846	1.24986	0.156983	0.0252317	0.404292	1.15731	-0.132623	1.08075
1767	H300016268	H300016268	-1.4038	0.460142	-0.839915	-0.494209	-0.588032	-1.48454	-0.835521	-0.0752447	-0.0931002	1.66375	1.67291	1.51082	0.86175	0.990737	0.92412	0.636617	0.506915	0.611812	-0.336944	-2.1736	-1.60039	-0.261031	0.0909053	-0.549396	0.329812	0.504618	-0.0291957
6178	opHsV0400010113	opHsV0400010113	-0.092694	0.5951	0.04406	-2.15393	-0.537615	-2.37629	-1.71403	-1.5776	-1.53607	0.829038	0.844034	0.207988	0.375708	0.99789	1.02996	0.438396	0.528045	0.356938	1.19619	0.130819	0.234657	0.897084	0.029284	0.0139418	0.415314	0.0846916	0.739083
1312	H300009200	H300009200	0.138653	-0.370889	1.28046	2.7178	2.17646	1.78256	-0.0566264	0.059543	0.294644	-0.0820028	-0.425558	-0.345485	0.365139	0.568292	0.408566	-0.096835	-0.0195044	-0.122648	-0.949357	-1.0602	-0.868889	-1.08517	-1.02395	-1.07757	-0.585747	-0.691622	-0.930057
25424	OSTF1	H300018980	0.62287	0.89495	1.74294	1.31948	2.08598	0.888096	0.536411	0.561589	-0.0163899	-1.40671	-1.08133	-1.80374	-0.105697	-0.553371	-0.258045	-0.646747	-0.674342	-1.02938	-0.751599	0.948157	0.205975	-1.56969	-0.438108	-0.796617	0.589938	0.646408	0.0889767
17441	FYB	H200005324	-0.459912	0.0778973	2.1203	1.41241	1.52214	1.56431	-0.120433	0.269171	0.242236	-1.61607	-1.62262	-1.39954	-1.54584	-1.5034	-0.857912	-0.312685	-0.0497081	-0.193697	-0.250357	0.952492	0.109024	0.0888585	0.207742	0.645817	0.37213	0.116681	0.230968
18662	HINT3	opHsV0400006565	-0.0961604	-0.0974666	-1.12771	-2.31418	-1.67171	-2.42958	-0.439345	-0.606847	-0.232205	1.30504	1.13962	1.45182	0.935954	0.608564	1.0397	0.0446044	0.127949	0.19714	1.26002	0.348615	0.231879	-0.528411	-0.272234	0.198349	0.286891	0.0910973	0.548607
20606	KRT14	H300011685	-1.06016	1.07874	-1.9284	-0.485165	-0.596715	0.059731	-0.744455	-0.820136	-0.794214	1.69301	1.4704	1.4259	1.33158	1.61817	1.08542	0.33343	0.20555	0.223661	0.13667	-0.158765	-1.55461	0.374304	-0.815683	-0.0181061	-0.685966	-0.799238	-0.574939
6083	opHsV0400010007	opHsV0400010007	-0.490211	-0.106448	0.270149	-2.43586	-1.71014	-1.91679	-1.23013	-0.657896	-0.519903	0.728149	0.841044	1.58245	1.04442	1.6935	0.684357	0.176421	0.16592	0.383044	-0.237785	-0.688512	-0.543328	0.468825	0.152361	0.624893	0.627377	0.77221	0.321873
21101	LNX2	H200003738	0.518451	0.325152	1.30984	1.24708	1.40705	1.45015	1.84364	0.414734	0.338352	-0.598044	-1.15492	-0.868325	-1.0494	-0.378064	0.143562	-0.607792	-2.00075	-0.680758	-1.54444	0.248204	1.406	-0.627476	-0.672174	-0.840863	0.0140056	0.184009	0.172779
34758	XRCC6BP1	H200005417	0.839517	1.64965	1.05278	1.06917	0.316594	1.51045	-0.0565636	0.125937	0.0724288	-0.150654	0.455936	-0.350038	-0.00853049	0.509078	0.304056	0.381534	0.992682	0.40639	0.0405821	-1.60474	-2.35066	0.31597	-1.97492	-1.58758	-0.670874	-0.564364	-0.72383
6440	opHsV0400010466	opHsV0400010466	0.410862	1.93454	1.46824	-0.0930826	-1.01401	-0.0325954	0.321113	0.946648	0.91256	-1.24212	-1.31846	-1.30946	-1.01151	-1.4008	-0.605445	-1.1472	-0.55897	-0.819198	-0.225543	0.467794	0.752531	-0.176337	-0.123089	-0.0267943	1.08899	0.940808	1.86054
14523	CP21A_HUMAN	H300000198	-0.0990725	0.41452	1.20188	2.36357	2.26587	2.28148	0.617094	0.114338	0.254175	-0.254527	-0.694647	-0.314212	-0.73396	-0.572758	-0.501316	-0.360685	-0.501815	-0.659287	-0.219531	0.544923	-1.19171	-1.28128	-0.862411	-1.01845	-0.226776	-0.352248	-0.213153
23800	NP_001073990.1	opHsV0400003502	-0.58228	-0.583054	-1.87533	0.272262	-1.32378	-1.41414	-0.0321957	0.124461	0.12665	2.40221	1.46635	1.90964	0.667845	0.539045	1.43006	0.802301	0.372255	-0.199567	-0.868265	-0.704133	-0.365881	-0.113953	-0.542763	-0.939305	-0.431706	-0.0192291	-0.117488
20018	KCNIP3	H300018905	-0.1458	0.793861	-0.31031	-0.962991	-1.56654	-1.41151	-0.704064	-0.839779	-0.861858	1.04706	1.57314	1.35236	2.14478	0.957054	0.445509	0.652052	0.40475	0.705083	0.056037	1.35823	-1.04973	-0.809943	-0.968458	-0.803296	-0.0401823	-0.625709	-0.389747
20992	LILRA2	H200010649	-0.340574	0.387733	2.0886	0.979744	0.990787	0.955181	2.3069	0.95232	0.222788	-0.595205	-0.978991	-1.19363	-0.873683	-1.20004	-0.710005	-0.801475	-0.638546	-0.707861	-1.02246	1.6157	0.395174	-0.31387	-0.538868	-0.976384	0.165924	-0.237725	0.0684645
33381	TRA2A_HUMAN	H200003456	1.50972	0.298248	-0.385806	1.31703	1.49304	0.336206	-0.656321	-0.952752	-0.659482	1.24562	0.917087	0.163869	0.23907	0.725574	0.12115	1.00974	1.41353	0.921901	-0.451187	-1.42805	-0.350724	-1.04507	-1.25529	-0.989033	-0.886591	-0.859793	-1.79169
3785	opHsV0400007116	opHsV0400007116	-1.71687	-1.82957	-0.809768	-0.765795	-0.422885	-0.0888465	-0.123053	0.0265062	-0.084364	1.15535	1.35806	2.36032	0.678791	2.20166	1.04646	0.282726	0.235515	0.0031561	0.125326	-1.02722	-0.95023	0.236469	-0.413804	0.00697403	-0.515806	-0.366821	-0.602275
12811	C8orf61	H300022806	-1.24329	-1.70501	-1.03853	0.259804	0.490004	-0.448899	-0.650825	-1.00858	-1.326	-0.638558	-0.297962	-0.0676836	0.0707542	-0.0622845	0.816188	-1.47461	0.17963	-0.946063	1.86718	2.06214	1.08803	-0.0160249	0.749798	0.758027	1.22539	0.676326	0.681055
23821	NP_055260.1	H200006315	1.10322	0.916464	0.639536	1.58908	1.83386	2.01899	0.0452457	0.309241	0.665243	-0.850641	-0.442349	-0.506618	0.413775	0.317951	-0.441024	-0.614	-0.588594	0.183476	0.978543	-0.476877	-1.11659	-1.62582	-1.56074	-1.60291	-0.192956	-0.588215	-0.407293
4407	opHsV0400007943	opHsV0400007943	-0.602688	0.0124467	-0.444717	-2.25752	-2.27446	-2.07792	-0.263846	-0.301746	-0.190472	1.0585	1.13541	1.51568	0.888729	1.86426	0.428234	0.266449	0.379482	0.350913	0.931074	-0.277187	-0.18088	-0.0106444	-0.107149	-0.164009	-0.093173	0.367353	0.0478917
5053	opHsV0400008715	opHsV0400008715	1.85214	0.321541	1.18708	1.83311	1.22509	1.53462	0.68673	0.67739	-0.0823804	-0.728769	-1.38113	-1.77298	-0.0107658	-0.488754	-0.328989	-0.426893	-0.359207	-0.721125	-0.496017	0.566489	-0.102444	1.191	-0.277434	-0.887309	-0.779111	-0.811647	-1.42023
11454	BRD4	H200017337	-0.837693	-0.0884975	-1.24846	-0.238578	-0.58912	-2.13227	-1.31853	-1.35948	-1.04278	0.429189	1.73452	-0.0232965	0.621002	0.3796	1.17524	0.242828	1.26671	1.38083	1.84017	0.263919	-1.32279	0.108224	0.141507	0.0538417	0.0456443	0.0918067	0.426463
25458	OVOL2	H200005764	-0.970475	0.347294	0.786566	-0.813492	-0.437564	-0.460711	0.401141	0.210367	1.72814	-1.0783	-1.43545	-1.19627	-1.38833	-1.45522	-1.93877	-0.0851925	-0.108802	0.16225	1.23815	0.196698	1.01677	0.810811	0.693563	0.742929	0.79142	1.36767	0.874817
23840	NP_055842.1	H200019938	0.173719	0.60768	0.712653	2.40508	2.40977	1.74548	0.428754	0.106018	0.449273	-0.748163	-0.447735	-1.55752	-0.353606	-1.59364	-0.929148	-0.456189	-0.620234	-0.110861	-0.613432	0.643644	-0.681522	-0.762773	-0.564487	-0.700997	0.248811	0.0426677	0.166761
35586	ZNF654	H300005300	2.51503	0.567818	0.471167	0.885529	0.748286	0.508916	1.58469	1.15597	0.667113	-0.554017	-0.778865	-0.94678	-0.502123	0.201405	-0.289381	-0.0620319	1.01725	-0.544291	-1.20171	0.524068	-0.691162	-1.89745	-1.68688	-0.932625	-0.313944	-0.183261	-0.262723
29091	RAB8B	opHsV0400012999	1.39321	-0.105343	1.03057	2.08555	1.31125	1.66895	0.533864	0.646019	0.454165	-0.429396	-0.279264	-1.13562	-0.109506	0.434453	0.203646	-0.399045	-0.0372927	-0.400133	-2.04115	1.13888	-1.01165	-0.692703	-0.859753	-0.363377	-0.716438	-1.34142	-0.97848
18177	GPSM3	H300014842	-1.26192	-0.315822	1.42056	-1.21157	-0.987661	-0.398399	0.231406	-0.308922	0.272697	-1.64903	-2.26094	-0.487955	-0.264128	-0.702291	-0.303302	-0.135578	-0.274538	-0.494394	0.344349	0.406305	1.18775	1.02631	1.04074	1.26985	1.2592	1.29469	1.30259
4502	opHsV0400008044	opHsV0400008044	-1.18654	0.119739	-0.534853	-0.676357	-0.727131	-0.498674	-0.581427	-0.60837	-0.32582	1.72429	1.39424	1.78615	1.26985	2.7647	1.06752	-0.260666	-0.526424	0.194718	0.318102	-0.489035	-0.603692	-0.053196	-0.931192	-0.592009	-0.753295	-0.769687	-0.520948
1967	M2NC000001	M2NC000001	-0.999895	0.235421	-0.260149	-0.824168	-0.796344	-1.32668	-0.819366	-0.916605	-3.62751	0.794068	0.22086	0.698626	0.702323	0.751391	0.789606	-0.102468	-0.2121	-0.0747312	0.850374	0.247424	0.76859	0.674526	0.368139	1.053	0.593451	0.782325	0.4299
3218	opHsV0400005030	opHsV0400005030	1.67243	-0.265649	1.70243	-0.797863	0.52746	0.429349	0.683304	0.828382	0.358899	-1.92873	-1.71823	-1.62247	-1.6073	-0.737135	-1.53631	-0.0451967	-0.063009	-0.150567	0.496526	-0.303725	0.963397	0.366212	0.38056	0.656953	0.33887	0.684754	0.686651
21433	LRRC26	opHsV0400001676	-0.542208	0.415736	-0.265913	-1.85158	-1.30161	-2.95859	-0.492339	-0.505541	-0.0660866	1.12353	1.71608	1.51357	0.864298	1.25279	0.569804	0.518777	0.440155	0.646331	0.48469	-0.153185	-0.684345	0.0613235	-0.417567	-0.309627	0.0569158	-0.22173	0.106324
15480	DIP2B	H200002973	0.361814	0.218264	1.12213	2.10864	1.25204	1.75683	0.320893	1.23059	0.864254	-0.626224	-0.265395	-2.0357	-0.181341	-0.0315243	-0.0850587	-1.18622	-0.750556	-1.07441	-0.441414	0.379595	-0.519291	-0.943075	-1.4771	-1.06235	0.22558	0.657991	0.181018
20305	KIAA1600	H200014506	1.89657	0.424802	-0.502125	1.68784	0.968714	1.65297	0.985137	1.03293	1.17356	-1.16092	-0.300309	-0.81239	-0.0122367	0.230676	-0.0171467	-1.94087	-0.55636	-1.29035	-1.10083	0.0986873	0.592131	-0.712084	-1.12051	-0.728802	-0.0448629	0.074994	-0.519203
5528	opHsV0400009396	opHsV0400009396	-0.400467	0.707006	-0.450748	-1.82606	-1.54676	-0.401876	-0.876785	-1.01103	-2.76937	0.64451	1.35355	0.998229	0.709167	1.93735	0.931981	0.450869	0.2706	0.376443	-0.302099	0.181206	0.69755	0.149852	0.531683	0.0675615	-0.0805884	-0.258914	-0.0828435
33475	TRIM21	H200000273	-0.35313	0.363191	1.15154	1.60443	1.61205	1.06449	0.155517	0.234428	-0.160868	-1.19665	-2.24098	-1.3824	-1.26994	-0.706348	-1.21804	-0.674866	-0.190867	-0.474454	0.223916	-0.09784	0.530268	0.302294	0.177763	-0.0084801	0.224386	0.140857	2.18972
34492	WDFY2	H200002573	1.09755	-0.242145	0.601303	1.7457	1.67938	1.27491	-0.169066	1.24463	0.08634	0.192546	-0.485152	-0.751227	0.0991413	0.0654724	0.704397	0.540432	0.769764	0.348635	-0.208687	-2.48835	-0.579488	-0.929099	-0.128148	-0.690875	-1.32381	-0.872385	-1.58175
22439	MRPL30	H300014128	2.17937	-0.0515416	1.52814	2.11965	0.981929	0.239268	0.463439	0.941905	0.834378	-0.703011	-0.396102	-1.32081	-0.95847	-0.601864	-0.492477	-0.752228	-0.742879	-0.275672	-1.52248	1.29971	0.194917	-0.670639	0.322042	-0.919991	-0.67871	-0.687057	-0.330815
16029	EEF2K	H200016493	-0.381603	-0.0822125	-2.07207	0.527358	-0.815381	-0.282986	-1.18018	-1.28753	-1.88502	1.03543	1.70386	1.15576	1.32828	0.917755	0.285761	-0.0312961	1.83484	0.489021	0.0924096	0.328428	-0.0332415	-0.153821	0.0403506	-0.158395	0.279896	-1.42132	-0.234105
14095	CKS2	H300007657	3.2054	1.05454	0.716819	0.166365	0.375258	0.675323	0.77728	0.481578	0.469666	0.00542731	0.102998	-0.528844	-0.607296	0.112653	-0.50333	0.444099	0.736684	0.701138	-0.199586	-0.306775	-0.460951	-0.764354	-0.894416	-1.5347	-1.65707	-1.02634	-1.54157
23894	NP_060028.2	H300012344	-0.377556	-0.827838	-1.06181	-1.81839	-0.78484	-0.147779	-0.628944	-1.58783	-1.69183	-0.368808	-0.489803	-0.177422	0.267923	0.423914	2.32223	-0.269919	-0.152026	0.283186	0.493991	1.62193	1.30126	0.479321	0.805309	1.48551	0.52989	-0.028338	0.398681
6307	opHsV0400010321	opHsV0400010321	-1.96432	-0.412577	-1.10488	-1.81207	-0.82045	-1.27439	-0.463962	-0.349549	-0.816414	1.64683	1.16534	0.890079	1.49328	1.1058	1.4188	-0.462747	-0.466341	0.0966246	-0.459235	0.955572	-0.819476	0.946695	0.593351	-0.0738631	0.399757	0.208511	0.379651
16322	EPB41L5	H200001291	-1.89348	0.782717	0.0581762	-0.728408	-0.677033	-0.675747	-0.412506	-0.386518	0.0909715	2.25565	1.96498	1.7431	0.867751	0.967004	0.316323	0.565298	0.123946	0.572646	0.654382	-0.479818	-1.11837	-0.705347	-1.07466	-0.689241	-0.527888	-0.772783	-0.821149
450	H200016417	H200016417	-0.818087	-0.955153	-1.35885	-0.599646	-2.16466	-1.8016	0.397051	-0.249652	0.460445	-0.532826	-0.803286	-1.09848	0.396416	-0.267275	0.858313	0.292356	-0.514318	-0.166964	0.859017	1.35998	1.52517	0.231176	0.658949	1.00469	1.54331	1.04041	0.703518
29980	RRAGA	H200005243	1.08528	0.987555	-1.27274	2.28115	0.804125	1.94593	1.59272	1.03115	0.963435	-1.24879	-0.606984	-1.21855	-0.0788769	-1.11331	-0.805033	-0.166537	0.202392	-0.0301656	-0.19924	-0.261184	-0.778706	-0.488303	-0.269011	-0.503965	-0.469914	-0.351879	-1.03056
28040	Q8IU91_HUMAN	opHsV0400002654	1.28886	-0.567893	1.94588	-0.4897	0.0567307	-0.219455	0.0497797	-0.598174	-0.493388	-0.911214	-0.843383	-1.08909	-0.984533	-1.61799	-0.920572	-0.931481	-0.597212	-0.712399	0.28236	1.5877	1.30482	1.33487	1.37362	1.28391	-0.268418	0.856758	-0.120387
31321	SLU7	H200020449	0.411904	0.661893	0.829884	2.5654	2.32431	1.99258	0.265255	0.0412863	0.326944	0.0523669	-0.514607	-1.38625	0.246095	-0.138201	-0.121101	-0.626148	-0.766989	-1.09079	-0.687294	0.0619977	-0.896716	-0.902782	-0.946783	-0.922972	-0.331146	-0.0464877	-0.401651
33163	TNFAIP2	opHsV0400006206	0.305856	-0.0214271	0.833001	0.251895	0.144609	0.224643	0.0766686	-0.366916	-0.207324	-1.74017	-1.17783	-1.46852	-1.46781	-2.94566	-0.838626	0.0604536	0.347144	0.515664	0.972712	0.534979	0.718245	0.980323	0.786579	0.876145	0.919678	0.710926	0.974765
1386	H300010234	H300010234	-0.601532	0.123626	0.610084	-1.73602	-1.4763	-1.30837	0.0310502	-0.128597	0.234218	1.37403	1.20911	1.27063	1.89784	1.0272	1.157	0.8164	-0.0818718	0.744225	0.177743	0.148715	-1.69269	-0.71695	-1.14885	-0.983445	-0.122258	-0.486557	-0.338436
18138	GPR64	H200014335	-0.304154	0.604408	1.37495	-1.20206	-0.789336	-1.37579	0.439338	0.578084	0.674431	-1.20389	-0.838943	-1.24515	-0.267742	-1.21611	-1.14184	-0.538433	-0.814101	-0.900111	0.528779	1.43139	2.08542	0.859893	0.515036	0.370199	1.46782	0.421265	0.48667
1218	H300008048	H300008048	0.299652	-0.256687	-1.743	-1.22873	-0.56989	-0.404733	-1.09235	-1.58678	-1.47473	0.353817	0.994541	1.17065	0.385202	0.422502	0.321097	1.52962	1.37853	1.71567	0.958426	-0.738946	0.542933	0.283137	0.797626	0.267221	-0.457052	-1.33595	-0.531791
18152	GPR89_HUMAN	H300008139	1.35142	-0.0847243	-0.716181	1.36214	0.817045	0.320844	-0.695842	-0.843517	-1.0863	0.791771	0.111549	1.05089	1.08842	2.02759	0.917025	0.157197	1.00482	0.796702	-0.796677	-1.57929	-1.34035	-0.949597	-0.913531	-0.496546	-0.62674	-1.28686	-0.381249
22631	MTMR9	H200004901	3.31551	0.56136	-0.00967386	0.433871	-0.320352	-0.0306934	0.693528	0.613533	0.333887	-1.50547	-1.33519	-1.14137	-0.491301	-1.12359	-0.744081	-1.20955	-1.24861	-0.573012	0.6466	0.97192	0.49075	0.619869	0.495572	0.430632	-0.23501	-0.0769666	0.437842
5334	opHsV0400009158	opHsV0400009158	-0.324126	-0.680546	-0.101841	-2.93545	-1.00174	-2.56582	-0.19165	-1.1173	-0.488506	0.866804	0.323365	1.07679	0.657612	1.1186	0.525748	0.192257	-0.467703	0.986118	0.171734	0.317558	0.523467	0.497422	0.352112	1.09056	0.579713	0.219255	0.375574
10150	ALKBH4	H200016776	-0.409872	0.57926	-0.391653	-2.25115	-2.14549	-2.19961	-1.27194	-0.783652	-0.144348	-0.39581	0.140934	0.925925	0.151689	-0.0921081	-0.41496	0.696545	0.4935	0.615496	1.09051	0.880553	0.774097	1.08921	0.48817	1.13267	0.701678	0.0553908	0.684978
30795	SIRT7	opHsV0400003902	-1.67956	-1.09805	0.410078	-2.36224	-1.31484	-1.57567	-0.772944	-0.459962	-0.413942	0.192731	0.973678	1.37734	0.483219	1.6118	0.948496	0.672057	0.126242	-0.236608	1.57007	0.650476	-0.0674598	0.36341	0.0413116	0.339523	0.56768	-0.604692	0.257846
27925	Q6ZUY4_HUMAN	opHsV0400009672	-0.191181	-3.96989	-0.244858	-0.706771	-0.807576	-1.04825	-0.744649	-0.997285	-0.718814	0.601602	0.653099	0.909157	0.637505	0.852838	0.656558	0.24105	0.0930717	0.229803	0.72196	0.129975	0.471467	0.474899	0.563866	0.615	0.424617	0.597735	0.555063
29320	RBM35B	H200017603	-0.0895033	0.134107	0.0425718	0.110765	-3.78625e-05	0.0495442	-1.10212	-0.591056	-0.989264	1.61057	1.35652	1.55903	1.5925	1.35688	1.16491	0.251221	0.0202539	0.196593	-0.54197	1.30856	-1.71773	-0.609645	-1.31176	-0.901458	-0.849915	-1.14595	-0.903614
11286	BCL6	H200014019	-0.424614	-0.0901752	0.845598	1.37018	1.22936	0.443121	-0.0558053	0.217898	0.711682	-0.41287	-0.740881	-1.23971	-0.72531	-2.15022	-0.762441	-0.8756	-1.00437	-1.50597	0.72033	2.79243	0.290392	0.455478	0.0435943	0.322205	0.272045	0.35865	-0.0849897
1722	H300015460	H300015460	0.185988	-1.40156	1.00329	0.927309	0.21437	1.01001	0.579212	0.879799	0.183663	-1.10237	-0.553873	-1.05936	-0.535613	-0.518902	-0.62969	-1.80855	-0.331625	-2.80783	0.614358	1.16005	0.905896	0.428056	0.291148	0.421351	0.832858	-0.0613774	1.17339
6562	opHsV0400010601	opHsV0400010601	-0.953716	-0.220774	-0.534296	0.741217	0.299131	0.55287	-0.155713	0.506641	-0.047574	0.829431	1.01874	1.3504	1.02298	2.65197	1.17988	-0.161406	0.0792318	0.10241	0.0167883	-1.12129	-2.00655	-0.165803	-1.367	-0.812717	-0.920458	-0.969437	-0.914967
26773	PPP1R13L	H300011974	-0.439291	0.9147	-0.372736	-2.3307	-1.00908	-2.06254	-0.81435	-0.730951	-0.374819	1.01223	1.0209	1.81427	1.16913	1.68475	0.800023	0.548001	0.101679	0.716424	0.355317	-0.300012	-0.555472	-0.595041	-0.844133	-0.236389	0.0674074	0.271431	0.18925
2787	opHsV0400003647	opHsV0400003647	-1.43048	0.395484	-0.850691	0.0885652	0.283245	-0.0840981	-0.667191	-0.763311	-0.641182	1.16471	2.15387	1.81709	1.85524	2.04569	0.418625	-0.00975437	-0.257671	0.172898	-0.115303	-0.384618	-1.15032	-0.555898	-0.936317	-0.594328	-0.648318	-0.80671	-0.49921
13960	CHES1	H300019553	-0.285196	-0.430064	1.73033	1.959	1.59864	2.23176	0.429221	0.409654	0.44502	-0.298827	-0.934012	-0.317105	-1.06734	-1.6992	-0.845445	-0.772834	-0.867388	-1.44654	0.393765	0.646237	0.262398	-0.730121	-0.59612	-0.012672	0.111404	0.151521	-0.0660841
18020	GPHB5	H300003705	-0.214651	0.790823	1.40111	2.46681	1.92028	2.40886	0.442192	-0.181839	0.302192	-0.0835691	-0.195	-0.0280622	-0.437296	-0.39865	-0.86468	-0.264742	-0.815654	-0.400532	-0.546411	0.176558	-0.165925	-0.853701	-0.564623	-0.983803	-0.635613	-0.95209	-1.32198
14973	CXorf26	H200012772	-0.0616468	0.381796	1.61114	1.40212	1.87614	0.913266	0.253183	-0.124758	0.504006	-1.73939	-1.83287	-1.54263	-1.18968	-0.610973	-0.514922	-0.904449	-0.58571	-0.161074	-0.511012	1.54535	0.601578	-0.745794	-0.16675	-0.0321108	0.666702	0.2769	0.691589
18671	HIPK2	opHsV0400003804	-0.5566	0.253754	-0.669753	-2.27158	-1.6036	-1.75687	-0.620603	-0.625528	-0.530656	0.613774	1.51458	1.31209	1.19452	2.28064	1.01085	0.0351829	-0.0247282	0.00560234	0.707298	0.0385638	0.0157453	0.375212	0.228465	-0.0434896	-0.0997123	-0.740451	-0.0427028
17684	GDI2	H200005230	0.16992	0.173505	1.10911	2.25729	2.25459	2.14316	-0.084811	0.107043	0.1938	-0.436419	-0.23509	-0.367945	0.429401	-0.0839631	0.312092	-0.047736	0.256112	-0.140995	-0.388546	-0.0471028	-1.19677	-0.51014	-0.826064	-0.834171	-1.45195	-1.38495	-1.36937
22396	MRAP	H300021222	-0.804218	1.07305	-1.79365	-0.745148	-0.732706	-0.0174749	-1.43213	-1.53744	-0.825328	1.36326	1.46643	1.70442	0.97087	1.27464	-0.164313	0.883434	0.637714	0.921733	0.633372	0.411679	-0.850274	0.24841	-0.811789	-0.196971	-0.306142	-0.972205	-0.399218
32019	STMN1	H200016257	0.93744	1.05038	1.83695	0.0663796	0.0460839	0.0121433	1.06587	0.882115	0.760799	-0.709541	-0.401891	-0.507686	-0.457353	-0.0528066	-0.153483	-2.22726	-2.20036	-2.40815	0.16703	-0.0295808	-0.0820883	0.0262202	0.584338	0.236234	0.637927	0.705373	0.214915
21971	MCOLN1	H200002204	0.108172	0.689395	0.857339	-0.579884	-0.613882	-1.00106	0.589284	-0.694267	0.792523	-1.39693	-0.918929	-0.438512	-1.88336	-0.9411	-1.23655	-0.765412	0.0403681	-0.703788	2.32952	-0.119521	0.317047	1.65743	0.73923	1.16328	0.804404	0.677366	0.527836
4239	opHsV0400007756	opHsV0400007756	-0.161518	-0.162125	-0.739624	0.58679	-2.04559	-0.142529	-0.323133	-0.575288	-0.314174	0.774074	1.36182	0.928993	0.360882	-0.0259652	0.0746005	1.81581	1.86664	2.23206	-0.447448	-1.42142	-1.3504	-0.042692	-0.338792	-0.470079	-0.407321	-0.419926	-0.61364
11496	BSN	opHsV0400000617	-0.47596	-0.297455	-0.684359	-1.75712	-2.931	0.12419	0.00478866	-0.104183	-0.733797	1.59149	1.52922	1.1381	1.30512	0.912808	1.15316	0.740878	0.604041	0.0690842	-0.445738	-0.806964	-0.637661	0.420368	0.0240789	0.385877	-0.466571	-0.296838	-0.365566
16501	EXOC1	H200003142	1.04414	0.235284	0.832618	1.96696	1.5907	2.03932	-0.0919086	0.713448	0.904857	-1.57312	-0.965727	-1.67839	-0.190272	0.5417	-0.29749	-0.948483	-0.781728	-0.404138	-0.144362	0.961032	-1.13376	-0.575321	-0.663853	-0.927547	-0.072623	-0.118233	-0.263106
3289	opHsV0400005269	opHsV0400005269	-1.3954	0.287675	-0.900908	-0.482605	-0.577931	-0.120684	-1.00226	-0.928125	-1.53623	1.87239	1.68923	1.89568	0.627436	1.4567	1.07629	0.451536	-0.0674508	0.119612	1.36956	-0.466635	-0.288644	-0.0156653	-0.381206	-0.328178	-0.75159	-0.467964	-1.13465
34023	UBQLN4	H300008920	-0.00859921	0.443835	0.834684	2.2267	2.00037	1.98596	-0.03274	0.309035	0.189821	-0.55388	-0.899168	-0.80004	-0.93318	-0.918088	-0.847818	-1.15869	-1.39364	-0.874863	-1.56065	-0.401252	-0.159812	0.479811	0.66259	0.465579	0.433248	0.202611	0.308176
30258	SCG5	H200000578	0.195897	0.349207	1.6664	1.60892	1.3691	1.27769	0.882736	0.967457	0.728271	0.208711	-0.957873	-0.241712	-0.216061	-0.173802	-0.18161	-0.0961757	-0.275395	-0.259663	-0.898873	1.90402	-1.43869	-1.09458	-0.847704	-1.11052	-1.06311	-1.2035	-1.09916
18848	HMX3	opHsV0400005064	-0.594723	-0.20094	-0.375339	-0.456038	-1.0122	0.115987	-2.08805	0.489074	-1.35969	1.66656	1.6252	1.01846	1.51739	1.18713	1.6018	0.0027467	-0.522732	1.29728	0.394761	-0.464491	-0.0331489	-0.900399	-0.941943	-0.515479	-0.388871	-0.652942	-0.409405
29435	RETNLB	opHsV0400000605	-2.38711	1.00594	-0.861714	-1.03786	-0.651319	-0.667697	-0.637906	-0.655244	-0.290132	1.47665	1.51866	1.90214	1.08669	1.44744	0.707134	0.535671	0.157299	0.434851	0.958942	-0.223869	-0.356569	-0.909905	-0.666968	-0.634859	-0.372383	-0.462926	-0.414957
3551	opHsV0400006294	opHsV0400006294	1.43969	0.202459	1.10206	1.89227	1.90277	1.70612	0.373027	0.0634906	0.669697	-1.2001	-1.56963	-0.482282	-0.387586	-0.817051	-0.615945	-0.16191	-0.41091	-0.133361	-1.9432	0.864591	-0.230537	-0.6177	-0.779013	-0.894841	0.200306	-0.0688151	-0.103598
16364	EPS15	H200006627	1.7964	-0.156019	1.45069	0.86184	0.503545	1.04182	1.30872	0.843568	1.08618	-0.883223	-1.14778	-2.47254	-0.449541	-0.303705	-0.703109	-0.644046	-0.425741	-0.432221	0.126362	0.196512	1.52157	-0.836069	-0.797496	-1.01989	0.225128	-0.611427	-0.0795181
26154	PIAS1	H200006045	-0.130508	1.16412	0.684025	1.66708	1.48119	1.41749	0.263577	-0.0819033	0.41605	-1.36961	-1.13552	-2.10685	-0.424047	-2.02004	-0.714923	0.138477	0.258805	-1.66206	0.823663	0.165482	0.0353167	-0.0911948	0.216448	-0.337286	0.336624	0.826249	0.179358
33514	TRIM5	H300022517	0.465238	0.318242	0.189274	0.843996	1.20944	1.17858	0.285237	-0.202827	-0.114993	-0.806799	-2.10889	-2.20465	-0.10556	0.41914	-0.148313	-1.36319	-1.52097	-1.57977	0.534309	-0.618631	1.10238	0.335913	0.911439	0.626312	0.952144	0.729934	0.67302
22349	MOSPD2	H300019240	0.458082	0.134746	1.56851	2.10642	2.08772	1.89303	0.337777	0.121444	0.500461	-0.150801	-1.06885	-1.77443	-0.830198	-0.215246	-0.211902	-0.743615	-0.823836	-0.589903	-0.7372	1.19914	-0.781089	-0.330562	-0.530028	-0.596087	-0.164638	-0.700061	-0.158883
18564	HECA	H200001281	0.582239	-0.581039	0.870256	2.04372	2.16684	1.82982	0.371082	0.587616	0.581365	-1.28459	-1.13994	-1.50032	-0.0847104	0.0257802	-0.286621	-1.12943	-1.02814	-1.44418	0.113444	0.72133	0.0592371	-0.723467	-0.710386	-0.376338	0.240987	0.200927	-0.105484
14495	COX11	H200015753	3.0432	0.50301	0.405418	0.626202	1.15769	1.02327	1.18114	0.970593	0.529173	-0.856844	-1.05983	-1.48405	-1.0758	-0.960327	-0.207989	0.230994	0.578334	0.335413	-0.473708	0.384839	-0.634346	-0.814385	-0.542359	-0.510808	-0.995293	-0.263183	-1.09035
30782	SIRPB1	H300018335	0.0767135	-0.34971	1.74185	1.62718	1.31393	1.89953	0.32256	0.0451543	0.290101	-1.48776	-2.15875	-1.48215	-1.44665	-1.02101	-0.440265	-0.635961	-0.16779	-0.163862	1.14185	0.282906	0.136302	-0.178628	0.165801	-0.205929	0.388342	-0.0752301	0.381477
18735	HIST1H4I	opHsV0400006110	1.54441	-0.171703	1.69337	0.284174	-0.429616	0.522867	0.64352	0.507839	-0.122199	-0.486303	-1.10496	-2.2237	-1.08467	-1.74997	-0.87787	-0.982476	-0.270501	-0.658879	-0.842299	0.0528418	0.601471	1.15148	1.64862	0.757555	0.397538	0.738659	0.460799
30622	SFXN5	H200005576	-0.32847	-0.405087	0.880123	-0.463292	-1.08997	0.230724	0.0424228	-0.35742	0.698935	-1.47152	-1.17657	-0.880748	-1.9272	-1.30603	-1.77327	-0.132633	0.478543	0.435309	0.637715	0.929404	1.50054	0.231279	1.61561	0.871751	0.930663	0.729101	1.10009
15283	DDX3Y	H300013272	0.386732	-0.649305	1.27252	1.24269	1.76515	1.6745	-0.628719	-0.11316	-0.104986	-0.0546838	0.561349	-0.696274	0.607154	0.0875635	0.586065	1.0146	1.24583	1.24824	-1.23559	-0.855866	-1.09724	-1.4169	-1.08359	-1.06036	-0.954746	-1.05468	-0.686296
2835	opHsV0400003821	opHsV0400003821	-0.333687	-0.0545522	-0.130951	-1.95332	-1.68147	-3.07887	-0.229064	-0.393942	-0.365822	0.757419	0.919708	0.760774	0.390108	0.53996	0.694585	1.29377	1.23309	1.55049	-0.216572	-0.256145	0.219133	-0.164041	-0.545674	0.362196	0.138615	0.493746	0.0505224
15757	DPP9	H300016952	-0.996829	-1.79683	0.44688	-0.454083	-1.24435	-0.362792	-0.485741	-1.39288	-2.60106	-0.276757	0.848931	0.434051	0.547034	-0.358414	0.428246	-0.21589	0.178903	0.0833675	1.38677	2.02091	0.605833	0.648844	0.868368	0.92023	0.143622	-0.166029	0.789666
28853	Q9NYS9_HUMAN	H300001955	-0.795291	-1.68932	-1.80378	-0.913551	-0.77279	-0.564633	-0.371601	-1.83934	-0.6644	0.355193	1.38794	1.36118	0.0509743	0.897411	0.518744	0.0480554	0.891574	-0.118417	0.347507	2.54685	0.511126	-0.357379	0.411455	0.263657	0.153978	-0.419521	0.564374
7138	opHsV0400011253	opHsV0400011253	1.11971	0.505027	1.6673	2.15361	1.25836	1.06918	0.583139	-0.282749	0.503621	0.0705257	-0.271785	-0.362047	-0.0099241	0.302176	-0.703077	0.068823	-0.441908	0.490098	0.505614	-0.322963	-2.52939	-0.951557	-1.48674	-0.955716	-0.72826	-1.03618	-0.214883
20576	KPNA2	opHsV0400006081	-1.27456	0.497227	1.93987	1.92827	1.50182	1.32625	1.03676	1.19919	0.518106	-0.592091	0.189279	-0.916312	0.037858	0.228805	-0.16087	-0.16945	0.145522	0.146974	-0.410718	-0.292271	-0.148345	-0.686644	-1.07138	-0.985249	-1.37463	-0.917302	-1.69611
26694	PPAT	H200000083	2.898	0.418658	0.511685	0.564445	0.211405	1.42871	0.311406	1.26361	1.39438	-0.438831	-0.251843	-0.720047	0.171156	-0.434353	-0.137294	-0.0366111	0.364275	-0.530718	0.309915	-1.63311	0.0269207	-1.15043	-1.07242	-1.83369	-0.865363	-0.226701	-0.543164
13717	CDK5R2	H200014150	-1.28014	0.617102	-0.381045	-2.44114	-1.5654	-0.56754	-0.915722	-1.66148	-0.722995	1.09509	1.91562	0.894134	0.438768	0.990662	0.30261	1.37893	-0.146531	0.294557	1.11382	-0.013769	0.0269972	-0.330018	-0.186274	-0.133377	0.643807	0.417166	0.216178
11295	BCLAF1	H300018441	0.942287	0.300523	-0.189675	2.4065	2.22255	1.78895	0.472723	0.648611	0.818835	-0.583422	-0.752254	-1.22653	-0.219343	0.178209	-0.17056	-0.902629	-0.688306	-1.08077	0.515801	-1.39288	-0.377341	-0.960762	-0.842527	-0.851805	-0.0103151	0.143526	-0.189403
325	H200010180	H200010180	0.597571	0.73184	-0.137851	1.41479	1.717	1.41202	0.749573	-0.505578	1.3391	-1.479	-1.24411	-1.61332	-1.82881	-1.32526	-0.86156	-0.252966	0.178565	-0.410566	0.919493	0.334668	-0.312125	0.0671954	1.2673	-0.0343129	-0.501031	0.158935	-0.381555
34014	UBOX5	H200011799	-0.660245	-0.255632	1.0657	2.16977	1.81918	2.04466	0.590542	0.0718268	0.498684	-0.741302	-1.12131	-1.34751	-0.8725	-0.983555	-0.445241	-0.942331	-1.17637	-1.19254	-0.219772	0.591997	0.950996	-0.106408	0.73524	0.367716	-0.0321029	-0.400353	-0.409142
51	AF168390_80	AF168390_80	-0.973385	0.0864839	-1.31589	0.575052	-1.61007	-1.34156	-0.356481	0.499843	-1.54683	1.65478	1.24802	0.24254	1.54255	-0.124336	1.68096	1.41873	1.07769	0.586365	0.0507221	-0.253999	-1.32935	-0.721399	-0.131821	-0.439134	-0.291376	0.0472565	-0.275358
2038	opHsV0400000583	opHsV0400000583	1.48844	-0.17821	-0.702527	1.28667	0.857281	1.4308	-0.352808	-0.32627	-0.425409	0.32352	1.06006	0.51034	1.17671	0.176094	0.372228	0.635427	1.21691	0.728371	-0.727663	-1.73052	-2.1258	-0.199701	-0.155453	-0.822893	-0.99643	-1.28319	-1.23598
18837	HMGN2	opHsV0400007050	-0.834276	1.28668	-0.516136	-1.8421	-1.7574	-1.43942	-0.383068	-0.874688	-0.454834	1.48941	1.26013	1.41455	0.824853	1.11056	0.484589	0.663504	0.754478	1.07648	1.04548	0.311487	-0.405837	-0.5846	-0.992981	-0.779361	-0.233218	-0.464443	-0.15984
19289	IDI1	opHsV0400000317	0.889368	0.0471855	2.68814	1.65973	2.09189	1.58029	-0.177541	0.0193552	-0.0334746	-0.749864	-0.665208	-0.787075	-1.30935	-1.36001	-1.20762	-0.576755	-0.358641	-0.430337	-0.447121	-0.462034	-0.269664	0.192828	0.220599	0.384953	-0.259623	-0.402447	-0.27757
12650	C6orf115	H200015615	-0.522079	0.439056	1.1337	1.09103	1.6726	0.955568	0.519512	0.822683	0.31496	-1.01919	-1.55786	-0.83617	-1.6672	-2.35016	-1.57209	-0.08398	0.149858	-0.278319	-0.395331	-0.31394	0.679925	1.3835	0.317539	0.121141	0.571701	0.427479	-0.00392565
22095	MFHAS1	H200003434	0.783268	-0.401115	0.409938	1.52628	1.96369	1.1827	-0.0622646	-0.913966	0.00479628	-1.34787	-0.524386	-1.61401	-1.18978	-0.696184	-1.18816	-1.34411	-0.550959	-0.992685	0.396275	0.457355	0.651975	-0.12886	0.461796	0.363398	0.300939	0.426018	2.02591
28334	Q8NBD0_HUMAN	opHsV0400001260	-0.750611	0.397287	0.332143	-0.216519	0.541208	0.297734	-0.657746	-1.03064	-1.04765	2.0521	1.27307	1.5099	2.00648	1.70885	1.03176	0.013312	-0.452336	-0.101443	-0.546986	-0.845527	-1.21629	-0.612678	-1.07863	-0.596009	-0.68445	-0.85639	-0.469943
27165	PSMA7	H300002045	2.28694	1.23421	1.35095	1.68397	1.30839	1.08299	0.26616	-0.131176	0.276553	-0.857865	-0.528568	-1.28354	0.424039	0.00346672	0.0439761	-0.325227	-0.408786	-0.598874	-0.183439	0.971079	-0.819586	-1.22132	-0.964714	-1.28474	-0.823422	-0.234025	-1.26745
19186	HSPA9	opHsV0400008843	0.83781	0.0919043	0.586774	2.22851	2.21288	2.61049	0.238543	0.316539	0.301332	-0.411751	-0.338564	-0.942663	0.0960143	0.470147	0.116376	-1.0789	-0.884431	-1.11105	-0.259051	-0.401393	-0.690412	-0.700723	-0.833093	-0.700732	-0.568171	-0.679314	-0.507078
31864	SSR3	H300007044	1.48862	0.313546	1.29027	2.12784	1.88442	1.40164	0.169189	0.149924	0.283229	-0.601739	-0.577423	-0.808628	-0.114544	1.16595	0.380779	-0.889432	-0.434015	-0.486257	-0.571367	0.479367	-1.01893	-1.27606	-1.366	-1.27417	-0.78476	-0.438388	-0.493065
35477	ZNF544	opHsV0400002643	-1.84125	-1.51331	-2.21756	-1.00019	0.343433	0.490414	-0.0980057	-0.00959856	-0.24011	1.24873	2.06514	1.68461	0.279492	1.08559	0.635001	1.08891	0.495709	0.724115	-0.973601	0.0169	-0.285249	-0.270921	-0.418735	-0.31495	-0.27578	-0.332486	-0.366284
32698	THRA	H300019922	-0.825067	-1.99001	0.106585	-0.294817	-0.240731	-0.786193	-1.20926	-1.87092	-2.29427	0.715052	-0.241875	0.440891	-0.303446	0.665772	0.935787	0.854886	0.327962	0.478344	1.36141	0.578272	1.07956	-0.564778	0.682155	0.554867	-0.143999	1.57588	0.407952
19992	KCNE1	H200012314	0.51515	-0.281831	1.19685	0.449053	0.617124	0.856265	-0.0256813	0.120546	0.0583468	-1.76929	-2.18708	-1.46174	-1.94058	-0.661563	-1.69812	-0.856242	0.682709	0.535912	0.443055	0.822366	1.17787	0.504061	0.57064	0.739267	0.610098	0.383946	0.598871
26623	POMT1	H300019259	-1.86693	1.10686	-1.49966	-0.833185	-0.97074	-0.548228	-0.916737	-0.966349	-0.485377	1.01848	2.16472	1.86357	0.964399	1.10609	0.726341	0.186523	0.416904	0.564262	0.841953	0.0590466	-0.916224	-0.321288	-0.848328	-0.446694	-0.0904661	-0.326385	0.0174456
34008	UBL5	H200011661	0.834728	0.850174	0.60617	2.47051	1.97067	2.12217	0.193466	-0.104912	0.410033	-0.474109	-0.748492	-0.802649	0.14678	0.152267	-0.0989706	-0.438137	-0.530427	-0.689928	-0.343734	0.883318	-0.977582	-0.999027	-0.898501	-1.23604	-0.663906	-0.582374	-1.05149
28609	Q96NT9_HUMAN	H300019603	-1.02751	-0.280074	0.401927	-1.47867	-1.24477	-0.670239	-1.34579	-1.40948	-1.25649	-1.1506	0.363699	0.414578	-0.00750212	-0.46825	-0.658058	0.553784	0.348404	0.856843	2.36426	1.30692	0.380643	0.477854	1.08483	1.41013	0.720029	-0.227942	0.541478
12325	C20orf119	H300016564	0.363618	0.946683	-0.3182	-1.38884	-1.51092	-1.90655	-0.701481	-0.655608	-0.535929	0.825849	1.48815	1.03919	1.35881	1.4806	1.05412	0.712436	0.294795	1.12709	0.0702402	0.852175	-1.42883	-0.64971	-0.883627	-0.763297	-0.214498	-0.283883	-0.37238
10227	AMOTL1	H300021038	-0.686604	0.145951	0.0902499	-0.949095	-0.854131	-0.483795	-1.45248	-1.86144	-0.969601	1.59169	1.16396	1.98481	1.09406	1.98224	-0.0040354	0.571867	0.0556817	0.554613	0.297741	1.05656	-0.868828	0.0833942	-0.336432	-0.621443	-0.479238	-0.885348	-0.220341
16736	FAM40A	H200007838	1.02293	0.55289	0.82286	2.37918	0.709065	2.04917	0.248931	-0.366978	0.516404	-0.7008	-1.40403	-0.835462	-0.336621	-0.430272	-0.152259	-1.56343	-1.8429	-1.15497	-0.540205	1.21122	0.447475	-0.620101	-0.180437	-0.176427	0.278823	0.00731039	0.0586274
13242	CCDC108	H300006312	-1.63409	0.789974	-0.982588	-1.82937	-2.0043	-2.05708	-0.857972	-0.843789	-0.00253908	0.493086	0.512721	1.18577	0.725121	0.372875	0.802847	0.6995	0.142776	0.464604	1.23226	0.426988	0.70527	0.093991	-0.731336	-0.119308	0.796447	0.96736	0.650777
18545	HDGF	H300015936	-1.25118	0.797661	-0.241424	-0.857855	-1.27179	-2.27589	0.161452	-0.206037	-0.728858	0.025885	0.0269001	0.722463	-0.488888	-1.42371	-0.315288	-0.324365	-0.454926	-1.24784	1.39063	1.00994	1.12413	1.45043	1.53037	0.923406	0.472244	0.89256	0.559984
4009	opHsV0400007429	opHsV0400007429	-0.165291	-0.712652	-0.597088	-1.48155	-1.77105	-1.70908	0.229514	0.407378	0.658064	1.49581	1.75457	1.03691	1.04519	1.21203	1.04065	0.601277	0.400002	0.856796	-1.54189	-0.838175	-0.609349	0.45109	-0.76056	-0.763613	-0.170262	0.146171	-0.214887
23591	NP_001013723.1	opHsV0400008538	-1.06235	0.624633	-0.478625	-2.29663	-2.13661	-1.45634	-0.36309	-0.528996	-0.0928017	1.15134	1.69628	2.02281	0.862883	0.16765	0.449	0.664105	0.701365	0.82103	0.344746	-0.0164908	-0.739618	0.174765	-0.256226	-0.382137	0.260936	-0.137242	0.00561359
15180	DBT	H200013307	0.61616	0.333713	0.91441	-0.701946	1.60104	1.38029	0.233822	0.580932	0.576266	0.853927	-0.328479	-0.832606	0.666069	0.773254	0.680893	0.70765	1.06978	0.282328	-1.90284	-1.21634	-1.8156	-0.559037	-1.70856	-1.56569	-0.27468	-0.13157	-0.233182
23039	NDUFC2	H200014560	1.31253	-0.237843	-0.112315	0.434091	0.765808	2.55897	0.333485	0.2931	-0.629393	-0.939082	-0.835216	-1.38481	-1.21847	-0.777264	-0.806364	-1.56468	-0.90248	-1.02808	0.293714	-0.361099	1.26222	0.87418	1.10404	1.34495	0.337908	-0.138829	0.0209357
12174	C1orf183	H200004031	-0.29728	0.162368	0.101842	-2.74765	-0.93789	-1.00878	-1.22983	-1.11292	-0.715867	1.22056	1.63361	1.5007	0.76465	1.7759	1.06709	-0.357603	0.120793	0.815415	0.463113	-0.23496	0.0281932	-0.485976	-0.634319	-0.0238607	0.30978	-0.24371	0.0666204
17660	GCSH	H300020147	3.28988	0.305265	0.583551	1.71203	0.285231	1.24077	0.613009	0.850675	0.263497	-1.16291	-0.714649	-1.36923	-0.337685	-0.418756	-0.468356	-1.14165	-0.193534	-0.854387	0.522674	-0.0361402	-0.185182	-0.142556	0.0853835	-0.285294	-0.855648	-0.407507	-1.17847
2205	opHsV0400001460	opHsV0400001460	0.145883	-0.575071	0.0976448	1.60603	1.92082	2.24495	1.26761	1.09588	1.19104	0.438091	0.0260933	0.132289	-0.447025	0.438998	0.238316	-1.1174	-0.860595	-0.817637	-0.930532	-0.398036	-1.59734	-0.916204	-1.01301	-0.713835	-0.351941	-0.777075	-0.327954
24490	NP_997365.2	opHsV0400006914	0.483897	0.61422	1.18017	-0.393828	1.256	-1.30418	1.56324	-0.115147	-0.294541	1.40009	0.51308	0.905572	1.25545	1.08	0.475058	0.656851	0.0296239	-0.0408809	-1.03527	-0.965218	-0.476984	-1.18504	-1.62075	-0.788982	-1.87368	-1.05175	-0.267
17456	FZD9	opHsV0400004087	-1.26026	0.271028	-0.42126	-2.10855	-1.6985	-2.40366	-0.347706	-0.930618	0.205306	1.07235	0.850898	1.64761	1.14072	1.64781	0.348251	0.420575	-0.00292079	0.443885	0.706182	-0.36922	-0.167303	0.352955	-0.0106027	0.148448	0.317255	0.103167	0.0441507
21873	MAT2B	H200005116	0.548151	0.760621	1.17803	2.27291	2.15789	1.83057	-0.565491	0.449309	0.766965	-0.98218	-1.22815	-1.0404	-0.0788946	-0.544759	-0.243923	-0.423102	-0.436488	-0.628593	0.193928	0.205533	-1.03029	-1.20328	-0.684413	-1.24712	-0.0601181	-0.257215	0.290512
5947	opHsV0400009867	opHsV0400009867	0.665137	0.184967	0.860863	0.624496	0.182959	0.666002	0.674905	1.77343	0.678047	-0.922044	-0.559299	-2.35133	-2.02391	-0.836948	-2.47306	-0.0327617	-0.0343719	-0.0223743	0.32558	0.991385	0.414293	0.525777	-0.380398	-0.050489	0.355006	0.112219	0.651909
28623	Q96RX9_HUMAN	H300006361	-0.926449	0.122347	-1.18236	-1.26956	-0.869089	-0.91775	-0.277557	-0.909809	-0.367792	0.648237	1.4928	1.94613	2.06698	1.78548	1.49003	0.396682	-0.641965	-0.0161197	0.930472	-0.72744	-0.255363	-0.619079	-0.101087	-0.491936	-0.472442	-0.164835	-0.668527
15162	DAZAP2	opHsV0400008258	-0.431511	0.190881	1.14654	1.95314	2.48095	2.21363	0.62903	0.205735	0.719995	-0.597584	-1.0346	-0.840016	-0.722403	-1.43475	-1.04292	-0.214629	-0.276468	-0.600492	-0.0463263	-0.208532	-0.475652	-1.24876	-0.527484	-0.361766	0.278894	0.16699	0.0781047
617	H300000498	H300000498	-1.08984	0.0820662	-0.321694	-1.88164	-1.53572	-2.3642	-0.359539	-0.958798	0.105061	0.430184	0.615243	1.03792	0.258213	0.725235	-0.0345786	1.34974	1.81631	1.85501	0.526898	-0.173043	-0.51111	0.169435	0.304193	0.280213	0.256053	-0.711589	0.129981
31288	SLCO5A1	H200014866	-1.99979	-0.579091	-0.906972	-1.32744	-0.461485	-0.734534	0.62316	-0.53882	0.501916	1.0687	2.23019	1.72212	1.19339	0.00271698	0.880052	1.09643	0.305703	0.924841	-0.55342	-0.716275	-0.886673	0.349433	0.327827	-0.0780149	-0.671862	-0.658259	-1.11385
27583	Q5JX50_HUMAN	H300021836	-1.69803	-0.0597646	-0.115831	-0.8957	-2.07501	-3.05751	-0.258242	-0.737577	-0.00639434	0.494872	0.42139	0.458374	0.927041	0.852848	0.844834	1.22881	0.90545	1.08575	0.547586	0.711364	-0.62042	0.242486	-0.185941	0.259337	0.083932	0.43156	0.214785
32828	TM2D2	H200001440	-0.903063	0.0674557	0.809697	1.65168	1.73297	1.38967	-0.0568541	0.302548	-0.0859832	-0.963794	-2.04869	-1.04884	-1.54775	-0.711495	-1.30123	-0.764826	-0.63493	-0.436671	-0.452582	1.3328	0.720399	1.13585	0.0241777	0.397703	0.680982	0.137988	0.572776
17816	GLIPR1	H300001203	0.565644	0.773171	1.06482	1.21808	1.37702	1.43833	0.903573	0.629698	1.07745	-1.37353	-1.61811	-1.14513	-0.451397	-0.879108	-0.432406	-0.129964	-0.270998	-0.617756	-0.465427	2.34136	-0.111069	-0.800774	-0.831732	-0.897158	-0.0964345	-0.711319	-0.556821
15419	DHPS	H300012451	-0.229666	-0.164447	-0.428811	-1.65164	-2.23335	-1.72	-0.0696045	-0.312167	0.091451	0.508444	0.404614	1.09759	0.442649	1.05606	0.477582	1.41922	1.54645	2.17681	0.357816	-0.188575	-0.663418	-0.804156	-1.09638	-0.326183	0.184098	-0.0794198	0.205024
26413	PLEKHJ1	H200008167	-1.38452	0.374496	-1.20702	-0.352398	-0.280295	-0.778678	-0.444596	-0.89088	-0.323261	1.26821	1.91193	1.72822	1.92315	2.28369	0.370377	0.131688	-0.156623	-0.0213224	0.359491	-0.428829	-0.730924	-0.707176	-0.941105	-0.66839	-0.186484	-0.139478	-0.709284
13169	CASZ1	H300013466	-1.22914	-0.197241	-1.22735	-2.41474	-1.04401	-1.76526	0.00643247	-0.894791	-0.472562	2.13249	-0.156821	1.74524	0.535193	0.909792	0.446261	0.605834	0.0943948	0.0791339	-0.364459	-0.293968	0.226727	1.11772	0.545438	0.365337	0.344357	0.241547	0.664449
19676	INTS7	H300022721	0.831875	0.474743	0.67088	1.65355	0.650459	2.49515	0.726584	0.715909	0.48944	0.396707	0.666922	-0.419129	0.656298	0.282257	0.275015	-0.633239	-0.844439	-1.52785	-1.81604	-1.52231	-0.779164	-0.2273	-0.134856	-0.326324	-1.10086	-0.528735	-1.12554
9724	ACSM1	H300011500	-0.302429	0.0659719	-0.256935	-2.60336	-2.61263	-1.99373	-0.466191	-0.805921	-0.283163	0.660253	0.905981	1.05575	0.645733	1.19245	0.720164	0.361847	0.380891	0.401789	0.741337	-0.44228	-0.011299	0.780265	0.21017	0.592596	0.309851	0.470366	0.282515
18988	HRASLS	H200004340	-0.840905	0.407094	1.07893	-0.209065	0.449349	0.423614	0.168999	-0.381515	-0.0232979	-0.531323	-0.399532	-0.867747	-0.700388	-0.866352	-0.509987	-0.101494	-1.81093	-2.89158	2.11859	1.0345	1.04683	0.623878	0.927412	0.826561	0.126492	0.508334	0.393526
18434	HADHB	opHsV0400004042	-0.127173	0.0558381	0.831758	2.49445	2.31063	1.95421	0.540575	0.650554	0.71749	-0.289648	-0.778352	-0.935061	-0.348177	-0.843698	-0.100417	-0.153389	-0.276118	-0.273723	-1.14581	0.543813	-1.20104	-1.04828	-0.979806	-0.892154	-0.297023	-0.108483	-0.300971
21885	MAVS_HUMAN	opHsV0400004811	0.543292	-0.0945581	0.274951	0.976135	0.465416	0.306503	-0.220395	0.1103	-0.66448	0.783399	0.796025	1.35347	0.942638	0.787998	1.0997	0.610684	0.679003	0.162273	0.0205691	1.3029	-1.34788	-1.09748	-1.5478	-1.77815	-1.64482	-1.06436	-1.75532
23561	NP_001013639.1	opHsV0400001962	-1.54336	0.0366511	-0.110755	-0.122382	-1.49972	-0.722153	-0.690379	-0.820935	-0.468437	1.79832	1.34496	1.94864	2.05701	0.850874	0.295755	0.6298	0.180762	0.244986	1.13853	-0.796556	-0.926402	-0.0493819	-1.04667	-0.306272	-0.458101	-0.0237799	-0.941009
5607	opHsV0400009496	opHsV0400009496	-0.881811	0.445165	-0.707942	-1.30885	-1.2214	-1.24029	-0.449026	-0.497015	-0.715668	2.06886	1.28859	2.37642	1.39319	1.71018	0.919155	-0.187108	-0.147814	-0.238512	0.00824013	-0.203689	-0.776229	0.102632	-0.121972	-0.227431	-0.565775	-0.293516	-0.528401
21605	LYPLA1	H200002154	2.37047	0.259142	2.03221	1.06815	0.940193	1.33954	0.742404	0.466538	0.240198	-0.680395	-0.160917	-0.566875	-0.206268	-0.711037	0.295792	-1.26286	-0.802277	-0.960238	-0.0387654	1.06	0.321425	-0.972749	-0.900576	-1.00055	-0.858293	-0.707491	-1.30678
10142	ALG6	H300003286	1.50818	-0.465595	1.88365	0.25175	0.177095	0.98766	1.53806	0.840308	0.184022	0.0848134	0.325482	0.228312	1.49498	0.979139	0.5405	-0.731444	-0.323401	-0.443004	-0.903378	-0.0212666	-1.15499	-0.555923	-1.00672	-1.25282	-1.77675	-0.844086	-1.54458
20212	KIAA0776	H200001061	2.598	-0.158843	0.813501	1.70533	1.61743	1.18232	0.976127	0.287813	0.337708	0.195328	0.204402	-0.684569	-0.436666	0.200861	0.104631	-1.10283	-0.549732	-1.37999	-0.820632	0.534653	-0.07899	-1.07795	-1.15417	-0.992954	-0.717578	-0.673926	-0.929278
913	H300004094	H300004094	2.23786	1.03945	0.515253	2.02886	2.165	0.479063	-0.272602	0.278125	0.290871	-0.779803	-0.874125	-0.352996	0.444624	0.911644	0.468565	-0.83391	0.0296071	-0.290257	-0.392937	-1.20758	-0.989693	-0.913202	-0.437308	-0.906226	-0.675219	-0.859393	-1.10367
25264	OR5AS1	H300001392	1.97184	-0.779927	1.00572	-0.189585	-0.767271	-0.626085	-0.541071	-0.440712	-1.02974	1.67404	1.48584	0.716035	0.055426	0.73588	0.544858	1.35658	1.17194	1.06658	-1.27979	-0.561677	-0.565428	-0.798674	-0.101748	-0.994116	-0.990615	-0.861746	-1.25656
35250	ZNF306	opHsV0400003585	-0.674203	-0.74221	-0.59214	0.742328	0.599121	0.148379	-1.394	-0.195818	-0.384304	1.00325	1.89225	1.48803	1.6711	2.30727	0.761818	0.102924	0.0598011	-0.130492	0.107159	-0.797826	-1.05551	-0.428383	-0.963011	-0.651112	-0.918384	-0.989142	-0.966893
34766	YAP1	H200001710	1.23729	0.640066	-1.85731	-0.402599	-0.694461	-0.149282	-0.758892	-0.455249	-0.346884	1.43789	1.59803	1.31463	0.954041	1.53601	0.184152	0.846718	0.181593	1.17652	-0.0432502	-1.15075	-0.864693	0.277461	-1.30928	-0.180223	-1.03019	-1.04551	-1.09582
16533	EXOSC9	H300012521	0.962469	0.999432	1.42665	0.665019	2.30427	0.801206	1.03937	-0.529558	0.970379	0.143858	-0.0503471	-0.29049	-0.493351	-0.767338	-0.0243826	0.661276	0.217912	-0.362427	0.545113	-1.67568	-1.79471	-1.15561	-1.50941	-1.26676	-0.222197	-0.207876	-0.38682
10713	ARL8B	H200011296	0.590334	0.0633699	1.19035	2.15212	2.02958	1.97169	0.211269	0.42728	0.449288	-1.52658	-1.10971	-1.39911	-0.342602	-0.725251	-0.0710769	-0.712769	-0.636093	-0.326643	-0.0393557	1.1064	-0.0845299	-0.951415	-0.766603	-0.760524	-0.0581879	-0.807745	0.12652
25396	ORMDL2	H200002233	0.105189	0.337103	1.38636	1.95029	1.83095	1.56178	0.264717	0.0390052	0.693793	-0.480953	-1.81142	-1.54202	-0.438289	-0.122862	-0.206808	-1.01968	-1.24135	-1.3663	-0.0687736	1.44861	0.114603	-0.261671	-0.023666	-0.375225	-0.163684	0.27765	-0.887336
16935	FBXL3	H300008152	-0.02842	-0.38403	0.978383	1.63661	1.409	1.28883	0.00230552	0.100193	-0.119862	-0.65372	-1.36043	-2.351	-0.822224	-1.1771	-0.817197	-0.710641	-0.601554	-0.973218	-0.530681	0.683194	1.91537	-0.0136301	0.979859	0.77873	0.285624	0.16149	0.3241
26492	PMM2	opHsV0400009224	1.10428	-0.0400558	1.21874	1.82857	2.62818	1.70977	0.927288	0.00301231	0.0853567	-0.0958196	-0.802322	-0.338298	-0.547261	-0.863958	-0.810971	-0.205835	-0.570013	-0.723308	-0.998581	0.671716	0.530556	-0.374861	-0.788629	-0.78894	-0.81613	-0.63707	-1.30542
13481	CCS	H200000971	0.423789	-0.107831	-1.24864	-1.62731	-0.755758	-0.62053	-0.719725	-1.33715	-0.386657	0.472088	0.696951	1.01414	0.853316	0.635774	0.596458	1.234	1.91073	1.83588	-0.0381485	1.53718	-1.45575	-0.225875	-0.853416	-0.364214	-0.414158	-0.912735	-0.142414
18351	GTPBP9	H300019527	0.718649	0.246967	-0.0676434	2.69421	2.34976	1.37889	0.245033	0.26119	-0.0275228	0.515977	-0.0522481	0.0416919	0.436287	0.671995	0.0973686	-0.444548	-0.100039	-0.416588	-0.470601	-1.68819	-0.851218	-0.811267	-0.750005	-1.45166	-0.861437	-0.671325	-0.99371
18006	GPBP1	H200005737	2.66726	0.728026	1.03588	1.79997	0.0889775	1.43326	0.883225	0.942927	-0.138643	-0.359571	-0.522645	0.307694	-1.1206	-0.457066	0.336476	-1.06865	-0.660772	-0.528643	0.302578	-0.577557	-0.480203	-1.47184	-1.2152	-1.38438	-0.220727	-0.011606	-0.308168
10015	AIM1L	H200012766	1.99333	1.18276	1.08329	0.720511	0.502572	1.92597	0.882296	0.811612	-0.298486	-0.954394	-0.503789	-0.883805	-1.2552	-0.794898	-0.923885	-1.43428	0.18509	-0.859817	-0.189203	1.82917	0.127809	-0.74889	-0.816877	-0.737301	-0.0612911	-0.64606	-0.136239
9553	ABCC3	H300019638	-0.0766227	-0.390188	-0.47789	0.793749	1.38835	1.37917	0.344354	0.230214	0.425557	-1.97158	-1.60099	-1.28283	-1.71352	-1.91336	-1.34878	0.112546	0.188772	0.140615	0.137225	0.688547	0.365183	0.749355	0.802918	0.632565	0.907072	0.577436	0.912139
10443	AP1G1	opHsV0400005071	0.819814	-0.0107694	0.700952	2.07039	2.29151	2.00199	0.40734	0.875109	0.193325	-0.305347	-0.700631	-2.00121	0.189222	-0.358619	0.155715	-0.859037	-0.942594	-1.16717	-0.459461	0.0156238	0.390763	-0.942728	-0.467586	-0.514213	-0.541017	-0.126521	-0.714843
3134	opHsV0400004823	opHsV0400004823	-0.943173	-0.340291	-0.729932	-0.993174	-0.807358	-0.979692	-0.538433	-0.183732	-0.457594	1.71935	2.0275	2.07346	1.38624	1.94977	0.820478	-0.158327	-0.344408	-0.120146	0.94194	-0.570697	-0.83175	-0.386402	-0.652757	-0.64544	-0.466708	-0.384594	-0.38413
23025	NDUFB10	H200014798	0.184279	0.628881	-1.95332	0.0678781	0.17151	0.167262	-0.0801913	-0.280526	0.112376	-0.0496447	1.89244	2.10774	0.993404	-0.0433825	-0.0507035	1.212	1.18451	1.40426	-0.255641	-0.60916	-1.41536	-0.967714	-1.10733	-1.10568	-0.80655	-0.328907	-1.07244
3013	opHsV0400004504	opHsV0400004504	-1.16014	-0.898752	-0.584178	-0.446148	-0.226316	-0.480658	-0.772213	-0.95728	-1.08458	2.19652	2.38319	2.3966	0.728925	1.2005	0.0748566	0.343246	-0.32486	0.18309	0.577512	-0.141981	-0.287151	-0.706434	-0.348804	-0.206597	-0.430911	-0.374545	-0.652883
11728	C12orf11	H200003170	1.62134	0.285573	0.114335	1.67096	1.85843	0.917352	1.05094	1.45441	0.442531	-0.910824	-0.976318	-1.63487	-0.243635	-0.403658	-0.143078	-1.04964	-0.111057	-0.144949	-0.368051	-2.29768	-0.397047	-0.0246306	0.617111	0.251292	-0.615648	-0.281302	-0.681898
27310	PTPN12	H200000018	-1.23693	0.298771	1.00553	1.93529	2.34026	1.91934	0.484171	1.12256	0.829696	-1.2506	-1.12032	-1.22646	-0.590088	-0.977187	-0.511796	-0.51651	-0.62865	-0.780054	0.163563	0.435131	-0.793428	-0.289386	-0.268438	-0.340856	0.0466647	-0.00550771	-0.0447719
34037	UBXD5	H200013492	-0.565151	0.283196	1.14831	-1.57566	-0.122598	0.168762	0.129843	-1.36143	-0.47946	-1.71001	0.015365	-0.355913	-1.64516	-0.383369	-1.42622	-0.406305	0.335008	-1.18004	1.43704	1.33554	1.36878	0.947031	0.73197	0.735491	0.696029	1.16446	0.7145
24066	NP_115701.2	H200004555	0.435941	0.113814	1.14416	2.10115	1.70293	1.70778	0.236939	0.393141	0.379552	-1.431	-0.526971	-0.301815	-1.90975	-1.95454	-1.51077	-0.126963	0.0130797	-0.447	-0.352726	0.856002	0.0694786	-0.364941	-0.134455	-0.610243	0.0939076	0.344642	0.0786532
21558	LTBP3	H300022455	-0.863057	-0.1498	-2.73031	-1.69415	-1.60186	-0.740769	-0.416322	-0.432549	-0.121529	-0.116208	1.10679	1.02684	0.582022	-0.0295271	0.116851	1.33504	1.65172	1.85174	0.373871	0.243398	-0.376924	0.258157	0.442745	0.189616	0.276347	-0.314441	0.132308
19693	IPO9	H200001459	-0.242685	1.1378	0.248512	2.06668	2.50917	1.19632	0.8807	0.552788	0.690649	-0.723394	-0.447358	-0.958753	-0.265305	-0.493006	-0.72672	-1.11117	-1.00403	-1.252	0.941483	-1.38784	-0.500152	-0.830837	-0.71674	-0.376587	0.217292	0.522263	0.0729167
3424	opHsV0400005684	opHsV0400005684	-1.0583	0.3923	-1.14979	-0.876051	-1.15267	-2.09814	-0.918456	-0.543909	-0.732209	1.45558	1.97111	1.10654	0.834443	0.298554	1.42535	0.315265	-0.264496	1.13228	1.58066	0.1161	-0.0308044	-0.0632768	-0.861824	-0.179687	0.174589	-0.314641	-0.558524
30846	SLC12A1	opHsV0400001972	-0.36139	-0.000986193	-0.32074	-1.9935	-1.37354	-3.4393	-0.192105	-0.994407	-0.284493	0.723282	0.67858	1.01838	1.0423	0.564058	0.758821	0.569226	0.844416	0.954328	0.267295	0.53393	-0.0838369	0.105563	-0.25066	0.617434	0.415507	0.0312272	0.170623
2140	opHsV0400001117	opHsV0400001117	0.819905	-0.889949	2.13577	2.08868	1.31228	1.27559	0.0161784	0.0948278	0.325424	-0.185724	0.407013	-0.111585	0.878635	0.489546	-0.0610163	0.052264	0.296548	0.00353633	-1.68223	-0.21694	-1.71277	-0.879173	-0.983467	-1.076	-0.833488	-0.463658	-1.1002
9564	ABCD3	H200006324	1.96838	0.091872	0.607911	2.01687	1.01367	2.1904	0.591372	0.330658	0.433546	-1.06096	-0.591114	-0.749093	0.540446	0.938156	0.675213	-1.02223	-0.821841	-0.722065	-0.928633	-1.02689	-0.447812	-1.08605	-0.898237	-0.798617	-0.551889	-0.26	-0.433064
2456	opHsV0400002377	opHsV0400002377	-1.0216	0.408138	1.28527	1.36946	1.85216	1.39731	0.361777	0.0275212	0.693337	-1.14279	-1.43336	-1.38864	-1.03905	-1.48769	-0.582007	-0.752754	-0.713528	-0.722103	-0.192728	1.85801	-0.147806	0.0916248	-0.313599	-0.108301	0.634528	0.261221	0.805599
14352	CO005_HUMAN	opHsV0400001382	-1.66886	-0.171672	-1.09288	-2.34433	-1.92153	-1.73386	-0.0285612	-0.0117901	-0.11854	0.76359	1.03981	1.47604	0.768504	1.82818	0.928742	0.041169	0.0500244	-0.0316498	0.873807	-0.0923088	0.254561	0.0128536	0.125964	0.252649	0.33496	0.211904	0.253232
264	H200006614	H200006614	0.622114	0.745053	1.31318	0.0957983	2.44152	1.69437	0.648661	0.320142	1.06047	-0.42832	-1.12094	-1.17786	-0.174429	-1.15032	-0.514067	-0.993242	-0.913392	-0.722761	0.00592595	1.8516	-0.748152	-0.935878	-0.694541	-0.731935	-0.120759	0.0259853	-0.398238
15894	DUSP9	H200013482	0.0601526	-0.0537377	-1.29325	-0.430562	-0.159729	0.365419	-0.626116	-0.368465	-0.86716	2.31992	2.02568	0.292527	0.791538	0.511786	0.93651	0.989371	-0.144214	1.63517	-0.207072	-0.241154	-1.09095	-1.40063	-1.18041	-1.68749	0.0858888	0.143226	-0.406246
16759	FAM53C	H300021803	-0.447644	0.233502	0.473194	1.75666	1.5895	3.24912	0.588887	0.473428	0.271918	-0.819153	-1.37577	-1.26564	-0.881939	-1.23338	-0.885285	-0.544473	-0.549496	-0.674287	-0.322827	0.145575	0.0944721	-0.364284	0.110994	-0.136075	0.218769	0.0557885	0.238434
27043	PRPF6	H300011037	-0.116075	-0.296656	-1.16478	-2.61849	-1.60647	-1.30344	0.180659	-1.52844	-0.872848	0.147826	1.60961	1.43911	-0.101134	-0.31274	0.0294612	1.01467	1.22433	1.08057	0.193326	0.130334	0.316878	0.404866	0.634456	0.889559	0.355098	-0.100416	0.370728
22238	MLLT6	H300017241	-1.40437	0.341512	0.0327445	-0.674478	-0.994241	-0.735827	-0.436294	-0.406124	-0.288579	1.02085	1.61525	1.62529	1.5078	1.53125	0.608608	0.356477	0.384855	0.827631	-0.0226124	0.706118	-2.42204	-0.323908	-1.04405	-1.19708	-0.0432753	-0.49488	-0.0706187
1497	H300011986	H300011986	0.740766	-0.461307	0.868879	1.55078	1.62727	1.82356	-0.685884	-0.0268537	0.060546	-1.07579	-1.89301	-1.31651	-0.707447	-1.2665	-0.361745	-0.985094	-0.793561	-1.03892	0.185922	0.583056	1.23996	0.235908	0.960045	1.02394	-0.322279	0.332807	-0.298535
26082	PHF1	H200007674	0.128216	-0.286719	-1.24423	-0.533243	-0.447034	-1.38262	-0.812619	-1.49429	-2.90523	-0.441398	0.18446	0.367417	-0.274546	-0.114843	-0.150691	0.693954	0.790861	0.793042	0.582481	1.18521	1.26834	0.570015	0.241622	0.211936	2.01522	0.442132	0.612565
24042	NP_079360.1	H300020616	0.631566	0.785986	-1.24023	-1.91615	-1.92268	-1.82407	-0.346879	0.0717598	-0.257175	0.715269	1.40726	1.48102	0.590977	1.04621	0.757898	1.22269	0.896623	1.2372	-0.52194	0.378985	-0.457601	-0.453787	-0.359417	-0.725994	-0.315476	-0.285056	-0.596967
26205	PIK3CG	H300001761	0.378055	0.031584	1.42879	1.4024	1.87534	1.19516	0.545734	0.87723	0.60818	-0.570944	-1.20197	-1.83866	-1.18867	-1.48068	-0.466245	-0.414034	-0.0285984	-0.885811	-2.22672	0.461402	0.292364	0.0890764	0.157062	0.225563	0.231339	0.335601	0.167457
4158	opHsV0400007658	opHsV0400007658	-1.0897	0.552833	-1.58533	-1.45236	-1.63332	-1.70464	0.0293049	-0.503763	0.199271	1.60181	2.18849	0.895296	0.973501	1.05099	1.41961	0.460062	0.00852528	0.352512	-1.04919	-0.242871	-0.33083	-0.00488277	0.0650989	-0.292162	-0.100425	-0.0892258	0.281388
24530	NPDC1	H200011379	-0.500214	-0.0706695	-1.67183	-2.37063	-2.01806	-1.907	-0.663315	-0.562118	0.333981	0.888468	0.255613	0.785436	0.720889	1.58901	0.880342	0.321895	0.124647	0.0222349	0.82853	-0.542659	0.911977	0.609805	0.703155	0.664375	0.21635	0.417221	0.0325566
3468	opHsV0400005883	opHsV0400005883	1.35555	-0.0357622	-1.3203	-0.52061	0.417705	0.212424	0.0465171	-0.32242	-0.518531	0.908375	0.797171	0.871725	1.24894	1.16224	1.05389	0.693359	0.94064	0.858555	-0.18767	0.359205	-2.88756	-0.611346	-1.28052	-0.881696	-0.903383	-0.865976	-0.59053
25997	PEX3	H200001401	2.15454	0.516962	-0.16575	1.71842	1.24771	2.56971	0.329308	0.510295	0.600759	-0.460454	-0.990458	-0.985326	-0.786633	0.00997074	-0.620474	-0.289944	-0.563022	-0.252217	0.285908	0.706469	-0.32397	-0.754615	-0.756349	-0.622898	-1.15553	-0.653426	-1.26899
4413	opHsV0400007949	opHsV0400007949	-1.46626	0.0682494	-1.10568	-1.85709	-1.36762	-1.68899	-0.467975	-0.096425	-0.51823	1.36355	1.08015	1.81194	0.617845	1.98175	1.26817	-0.085685	-0.0202207	-0.122711	1.24008	-0.0770284	-0.124327	0.116855	-0.0285157	-0.328169	-0.0259869	-0.150392	-0.0173008
28439	Q8TBR1_HUMAN	opHsV0400009539	0.486858	0.300853	-1.49519	-2.48773	-1.59582	-1.57198	-0.727877	-0.887508	-0.641676	0.565827	1.26523	0.972982	0.0393132	0.381089	0.310229	1.08965	1.49027	1.62364	0.731862	-0.525482	-0.0543767	0.24802	0.314104	0.318932	0.175222	-0.467672	0.141229
16526	EXOSC3	H300010497	-0.627762	0.181153	-0.581436	-1.81779	-1.92543	-1.16566	-0.577387	-1.19695	-0.102694	1.36182	1.78166	2.1433	1.34185	1.66995	0.282305	0.019893	-0.0851072	0.0491132	0.032688	-0.658378	-0.207742	0.356427	0.0598325	0.236772	-0.115074	-0.278109	-0.177247
12452	C21orf62	H200015165	0.18853	-0.760435	2.18864	0.882373	-0.548273	1.40099	0.504298	0.427685	0.331827	-1.34778	-0.811224	-1.39907	-0.461231	-0.808052	-0.334835	-1.66311	-0.547478	-2.11216	0.223874	1.32178	1.07569	0.670066	0.154398	0.0417909	0.479401	0.497351	0.404951
29008	RAB11B	H300004273	-1.00156	-1.68642	-0.985139	-0.5539	-1.69885	0.833202	-0.765759	-1.08064	-2.54	-0.202394	1.11076	1.04775	0.652011	-0.603632	0.394405	0.247353	1.2469	1.16349	0.418683	0.230747	0.748179	0.14065	0.544746	0.942276	0.671548	0.144548	0.581062
20801	LARP7	H200017330	0.138191	0.500695	0.230355	2.63064	2.15093	2.2122	0.438238	0.445804	0.703345	-1.33608	-0.787504	-1.14719	-0.0776984	0.14005	-0.179821	-0.870586	-0.553569	-0.626151	-0.229475	-0.970305	-0.93365	-0.604473	-0.499941	-0.767888	0.0535599	0.111287	-0.170962
35777	ZW10	H200002296	1.54518	-0.255555	0.820919	1.45405	1.63626	1.9553	0.289841	1.30504	0.473492	0.197091	-1.13372	-1.49683	-0.165806	-0.292092	-0.331458	-0.409661	0.200028	0.739801	-1.46708	-0.721264	-0.273856	-0.705082	-0.334254	-0.491868	-1.88472	-0.739434	0.0856773
27074	PRRG2	H200004292	-1.18979	0.0381855	0.0176074	-1.83918	-1.64377	-1.43003	-0.50983	-0.735554	-0.390269	1.27144	2.32464	1.81422	1.18332	0.477943	0.811022	0.346208	0.0466626	0.386918	-0.0382651	1.06173	0.133729	-0.751284	-0.690157	0.192679	0.00845261	-0.488359	-0.408276
27860	Q6ZS48_HUMAN	opHsV0400008668	1.10008	-0.0333976	0.780424	0.105768	0.0800341	0.761332	0.505385	0.372493	0.361445	-2.49073	-1.01215	-1.96071	-1.90405	-0.626656	-2.01694	0.236364	0.380612	-0.0595279	0.406826	0.454629	1.0108	0.6138	0.842555	0.721997	0.259173	0.622594	0.487844
18965	HPCA	H300003723	1.28665	0.774036	1.27353	2.53741	1.48999	1.81667	0.301079	0.098802	-0.0905388	-0.581812	-0.84884	-1.15754	0.114402	-0.400592	-0.515182	-0.251717	-0.303008	-0.806428	-0.254868	1.0024	-0.21036	-0.928442	-0.71763	-1.35382	-0.812522	-0.306327	-1.15535
320	H200009632	H200009632	-1.95469	-0.282993	-0.556037	-1.41737	-0.680564	-0.799819	-0.419865	-0.452419	-0.209927	1.08971	1.7632	1.94941	1.7254	2.17668	0.704889	-0.00259444	-0.314727	0.04948	-0.143143	-1.09895	-0.653124	0.254196	-0.0808447	-0.190648	-0.190504	-0.0629159	-0.201825
31311	SLITRK4	H200016840	0.119842	-0.313885	1.02649	0.825515	0.807419	0.8248	0.385283	0.2071	0.249647	-1.51534	-2.44329	-2.19158	-0.133543	0.819989	-0.135963	-1.16147	-1.26081	-1.4415	0.33096	0.143541	0.947257	0.615961	0.958359	0.663079	0.525844	0.381649	0.764655
30253	SCEL	H300019437	0.0849663	-0.462492	0.801167	-1.15424	1.07404	-0.685606	-0.395716	0.31325	0.218734	-1.62528	-1.13589	-0.891344	-1.21502	-1.05562	-2.07145	-0.412782	-0.157731	0.452383	0.379001	0.396057	1.44063	0.883469	1.04599	1.04447	1.17971	0.187941	1.76135
3208	opHsV0400005011	opHsV0400005011	1.32762	1.5746	0.0254314	1.71665	1.29789	1.23471	0.656716	0.327575	0.578802	-1.0674	-1.78867	-0.856006	-0.101444	0.0826583	-0.661902	-1.0831	-0.94084	-1.15349	0.353732	1.88623	-0.300355	-0.907589	-0.42946	-0.51857	-0.456396	-0.0552286	-0.74217
31099	SLC35B4	H200009532	1.04166	0.539123	0.00267224	1.20851	1.0234	-0.294084	1.86122	2.32363	1.24249	-1.06708	-0.356652	-1.96633	-0.138633	-0.238946	-0.0537422	-1.24096	-0.871796	-1.27483	-0.607854	-0.198919	-0.109786	-1.20823	-0.431056	-0.151559	0.164257	0.554374	0.249113
24121	NP_612411.3	H200007377	0.346831	0.121845	0.439114	0.899942	2.56716	1.64358	0.418623	0.719542	0.649328	-1.60864	-1.332	-2.11422	0.351641	-1.06308	0.248663	-1.03547	-1.16211	-0.861338	-0.271336	-0.00787421	0.108651	-0.45178	-0.132525	0.0255081	0.363107	0.398261	0.738578
22069	METT11D1	H300021021	-0.307437	-0.044045	0.394659	2.66006	2.28381	2.07603	0.80305	0.800783	0.808648	-0.232527	-0.915989	-0.658818	-0.78051	-0.624339	-0.546663	-0.617981	-0.75515	-0.0582424	-0.786403	-0.709159	-0.750577	-0.79	-0.877034	-0.696713	0.188481	-0.0252156	0.161277
10355	ANKRD37	opHsV0400006746	1.76181	0.723511	-0.444778	0.105818	0.760553	0.485193	0.752143	0.954569	0.231891	0.0716085	0.437197	-0.0742489	0.465319	0.118776	0.0313069	1.01553	1.09917	0.969576	-1.92168	0.864095	-1.95734	-0.500062	-1.05695	-0.870409	-1.54647	-0.817727	-1.6584
31780	SPTLC1	H200010438	0.455046	0.376687	-0.186768	2.52174	2.1456	1.8858	0.301755	0.155751	0.737406	-0.993454	-0.874928	-1.21671	-0.842645	-1.90955	-0.64855	-0.745631	-0.559416	-0.243441	-0.305758	0.788794	-0.356132	-0.563247	-0.269371	-0.281914	0.236323	0.0299989	0.362613
9888	ADIPOR2	H200019709	0.0542374	0.207718	0.577157	2.13291	2.30886	2.40468	0.351577	0.797394	0.458203	-0.364731	-0.203175	-0.8258	-0.278315	-0.389172	-0.257256	-0.460134	-0.310118	0.114558	-0.240912	-0.877179	-1.37117	-1.4261	-1.28275	-1.05567	-0.117367	0.0211108	0.0314443
29287	RBM10	opHsV0400002579	-0.971783	0.287801	-0.206744	-1.62019	-1.67678	-1.19937	-0.435708	-0.587621	-0.264643	1.59811	1.47123	2.00656	1.27265	2.00121	0.777181	0.225417	-0.00508998	-0.165899	0.893178	-0.233265	-0.682746	-0.461595	-0.585039	-0.323074	-0.311391	-0.376222	-0.426186
30053	RTN3	opHsV0400003168	0.863448	0.939329	1.19542	0.545847	0.403719	-0.194505	0.571707	0.441197	0.548764	-0.516642	-0.607445	0.463163	-1.79376	-1.69054	-0.814389	-1.79127	-0.240292	-2.47841	0.972837	0.743625	-0.645157	0.319266	-0.0493242	0.0196824	0.932223	0.959331	0.90217
22525	MS4A6E	H200012621	-0.849193	0.158215	1.51966	1.11351	1.02318	1.02303	0.365081	0.311202	-0.649666	0.204923	0.50687	0.400253	0.740563	0.929192	0.817362	0.65902	0.679447	0.50495	0.228109	-1.3449	-0.0962139	-1.0139	-0.990621	-1.37757	-2.65301	-1.02588	-1.18362
15051	CYP17A1	H200000357	-0.372645	0.287443	-2.56786	-1.37247	-1.30559	-0.217655	-1.31342	-0.386582	-2.21968	1.20009	0.358979	0.800721	0.429924	1.19127	0.145315	0.594879	0.0560981	0.565382	0.477907	-0.226076	-0.113437	0.0225826	0.514062	1.02667	0.976639	0.165638	1.28182
24597	NR1I2	H300020294	-1.3322	-0.606415	-0.785162	-0.737974	-1.53467	-0.80369	-0.554844	-1.09853	-0.546772	2.15498	1.40497	0.926072	1.36685	1.59616	1.27463	-0.131689	-0.448233	0.284381	-0.76601	1.53194	-0.948037	0.264604	0.0919893	-0.12539	-0.173019	-0.330449	0.0265102
11984	C17orf70	opHsV0400001497	-0.729903	0.0896783	-2.25811	-2.01206	-1.19158	-1.61054	-0.00192341	-0.761165	-0.796569	-0.473839	0.247781	1.3328	-0.306616	-0.348094	0.0783432	0.766443	0.22701	1.34243	0.93677	1.39112	-0.0969875	0.8044	0.663499	0.96266	0.990984	0.0179668	0.735503
15917	DYNLL1	opHsV0400006122	1.9182	0.257791	-0.232708	1.81295	1.97144	1.89417	0.277943	0.66489	0.409986	-0.478158	-0.838005	-1.03409	0.173554	0.073449	0.0746385	0.206213	0.364122	-0.344905	-0.841363	0.287696	-1.7554	-1.16264	-0.476168	-1.08367	-0.470607	-0.537892	-1.13143
22760	MYH3	opHsV0400006087	-1.0895	1.13446	-0.909477	0.279916	0.138961	-0.494227	-0.187	0.818815	-0.267273	2.15087	1.05621	-0.312403	1.25319	0.120358	1.33162	0.693074	0.744504	1.4585	-0.442461	-1.87066	-0.533058	-0.130654	-1.33792	-1.24865	-0.772776	-0.898807	-0.685603
1826	H300017261	H300017261	-0.732524	-2.20451	-0.818696	-1.28834	-0.744665	-0.172718	-0.596517	-1.56795	-0.958039	1.32309	1.19369	0.508237	0.836817	0.958895	1.35179	0.996475	0.195095	-0.427344	1.90663	-0.345563	-0.0360092	0.168645	0.542368	0.551645	0.191186	0.324819	-1.15651
18380	GYG2	H300019710	1.00044	-0.175028	-0.897176	-1.34781	-2.14961	-1.62929	-0.638829	-0.281254	-0.626368	1.27816	1.27955	1.20226	0.914705	0.561128	0.872509	0.873516	0.813863	1.3651	0.759361	-1.77302	-0.0534843	0.162892	-0.459087	-0.297262	-0.211382	-0.399586	-0.144292
23632	NP_001018000.1	H300014349	-0.877943	-1.5263	-1.09585	-2.29378	-1.57319	0.192025	-0.516863	-1.30912	-0.341786	0.768068	-0.12761	1.42668	0.171116	1.22008	-0.817893	0.0553402	0.0199953	0.48356	1.61577	0.505779	0.280301	1.59826	0.716505	0.646509	0.50304	0.279414	-0.0021085
21550	LTB4DH	H300018984	0.747035	0.718733	0.521214	2.2138	2.08153	1.77783	0.442291	0.405928	0.587697	-0.858758	-1.27566	-1.47041	0.063139	-0.00210064	0.295074	-0.401698	-0.578822	-0.599893	-0.0650167	0.831025	-0.937695	-1.40435	-1.10955	-0.95956	-0.206766	-0.463821	-0.351207
16462	ETHE1	H200001444	-0.901904	-0.775575	-0.270372	-2.16688	-1.90892	-1.89305	-0.289595	-0.395798	-0.290361	0.700948	1.22018	2.0457	1.17902	1.42927	1.18002	-0.183879	-0.0445717	-0.193149	-0.207098	-0.366473	-0.164102	0.574268	0.446238	0.468725	0.249931	0.401304	0.156127
24771	NUP133	H200002135	2.15963	0.47004	0.389041	1.73621	0.877197	1.51364	0.844326	1.0892	0.382961	-0.791754	-0.407074	-1.49178	0.206936	0.210726	0.319889	-1.09801	-0.379158	-0.588894	-0.480032	-2.54804	-0.250214	-0.371587	-0.14437	-0.524143	-0.451732	0.0438636	-0.71687
28603	Q96NM1_HUMAN	H200003774	-0.3952	0.718754	0.0618902	-0.623948	-0.543189	-0.671848	-0.0385678	-0.624845	0.189138	1.41844	1.63049	1.69126	1.15714	1.74092	0.725811	0.269843	0.311359	0.0728733	0.183433	-0.378977	-1.83327	-1.6259	-1.35486	-1.74094	-0.245184	0.1021	-0.196721
26963	PRKCI	H300004035	2.37615	0.586576	-0.475576	1.6652	2.24519	1.70726	0.530267	0.347767	0.245294	-0.489025	-0.573072	-1.43244	0.125702	-0.504752	-0.296836	-1.32033	-1.16484	-0.905867	0.0610154	-0.844858	-0.0521854	-0.328621	0.087045	-0.252702	-0.510162	-0.102647	-0.723558
22224	MLL5	H200019390	-1.12515	-0.051063	0.779261	1.66165	0.932669	0.468875	0.38158	0.497683	0.503225	-1.6503	-1.40207	-1.59981	-1.12293	-0.161606	-0.483291	-1.14842	-0.755159	-1.14177	0.172136	-0.268984	1.30756	-0.0272723	-0.0597194	0.109497	1.37425	1.43979	1.36936
2727	opHsV0400003467	opHsV0400003467	-1.8725	0.331976	-2.44839	-0.377416	-1.49142	-1.24599	-0.461353	-0.356587	0.0615623	0.391507	0.949192	0.92971	0.542409	0.461261	0.252962	1.66159	1.83379	1.52613	0.103231	-0.0132469	-0.483027	0.0253205	-0.159998	0.0149375	0.521011	-0.794882	0.0982285
25081	OR1J2	H300001496	-1.26552	0.532554	0.221028	1.73499	0.752878	0.104972	-0.261949	0.207808	-0.184507	-0.645084	-0.911031	-1.19845	-1.40247	-0.564618	0.0175612	-1.49684	-0.929842	-1.86023	0.35837	2.35352	0.457068	0.270707	0.998368	0.765696	0.684557	0.595525	0.664948
17739	GGTLA1	H200000438	0.302793	-0.0142296	-1.14917	-1.13114	-1.14779	-2.25271	-1.45541	-0.771559	-1.81742	0.276727	0.350412	0.102804	0.352127	1.88428	0.391972	0.894539	0.414027	0.993291	1.20866	1.43937	-0.124839	0.517639	0.0409829	0.399625	-0.430697	-0.125303	0.851048
13938	CHCHD9	opHsV0400002896	-0.534499	0.549645	-0.635965	-1.98247	-1.51236	-1.65803	0.300959	0.0801036	0.0870637	0.329041	1.6973	1.66869	1.75164	1.01006	0.917119	0.572686	0.82081	0.70932	0.309619	-0.677304	-1.27418	-0.689463	-0.843604	-0.470558	-0.19907	-0.00654448	-0.320009
20995	LILRA4	H200004892	-0.753668	0.287956	0.62829	-0.569646	0.204054	0.418194	0.617844	0.450933	0.647944	-1.77717	-1.14678	-1.24533	-1.55365	-2.42267	-1.57455	0.450534	0.0805215	0.167685	0.856491	0.610377	0.918308	1.30591	1.03544	0.830553	0.453304	0.839244	0.239876
5875	opHsV0400009793	opHsV0400009793	-0.549862	0.687283	1.14694	-0.0307825	0.0161899	-0.0429586	0.00617804	-0.437842	-0.231407	-1.332	-1.07225	-0.998265	-1.3607	-1.02552	-1.41647	-0.377698	-0.312905	-0.59971	2.94056	-0.52923	0.998538	0.509774	0.879554	1.01039	1.32115	0.705878	0.0951754
26834	PPP3R2	opHsV0400004040	-2.12694	0.0156604	-0.658863	-1.00651	-2.06268	-1.3618	-0.409662	-0.431731	-1.22843	1.72109	0.00986614	0.897483	0.851043	0.357985	1.63043	0.653413	0.380457	-0.0658505	1.46897	-0.0733246	0.624979	-0.794025	-0.0584832	0.584416	0.298159	0.0206273	0.763715
5827	opHsV0400009741	opHsV0400009741	-0.128385	0.172431	0.457506	1.93008	1.9952	2.05347	1.06218	0.465239	0.78781	-1.18643	-1.54192	-0.756912	-0.966238	-1.25366	-0.934622	-0.311225	-0.0956934	-0.464177	-0.867132	0.810029	-0.392906	-1.11283	-0.425607	-0.442222	0.624565	0.0433624	0.478082
18578	HEMK1	H200004813	0.722453	0.00765406	0.778441	-0.0658438	0.0978066	0.228493	0.658539	1.24204	0.311624	-1.05836	-1.72175	-1.43652	-1.72904	-2.6027	-1.6782	0.339199	-0.0689091	0.4932	0.23654	0.831657	0.598153	0.551852	0.447289	0.860355	0.727956	0.554496	0.673581
21559	LTBP4	H300013276	-0.243587	-0.0494224	-2.29267	-1.47188	-1.63899	-1.37957	-0.697024	-0.329739	-0.463028	0.807672	1.23161	1.64373	1.17534	0.753817	0.348649	1.16169	-0.670142	1.39474	-0.368652	-1.18946	0.154931	0.111777	0.245026	0.387583	0.481671	0.445141	0.45079
18832	HMGN1	opHsV0400000523	1.15591	0.399172	0.156749	2.39558	2.06697	2.20586	0.0393729	-0.263806	-0.110181	-0.126605	0.385146	-0.18825	0.695661	-0.00828031	0.276324	-0.245874	-0.0200304	-0.410638	-0.522286	-0.73461	-0.948483	-1.30367	-1.17404	-1.27659	-0.927382	-0.533085	-0.982931
22578	MTAP	H300012645	0.154742	-0.0889132	2.70947	1.05833	0.420815	0.452947	0.393804	1.60886	0.528169	-0.94604	-1.53497	-1.72655	-1.03484	-0.917958	-0.833946	-1.17798	-0.212808	-0.567124	-0.695654	1.33787	0.355647	0.868066	0.0663001	-0.0341697	-0.26165	0.409985	-0.332399
13388	CCDC93	opHsV0400001151	-0.441316	-0.540785	0.670925	1.44496	1.22478	1.70811	0.504449	0.0681326	0.270185	-1.0211	-1.18148	-2.27628	-1.10025	-1.75938	-1.21328	-0.310219	-0.0696579	-0.570444	-0.617776	1.17966	0.67624	0.284769	0.536591	0.30448	0.64974	0.929794	0.649162
5396	opHsV0400009238	opHsV0400009238	-0.880445	-0.183041	-0.346517	-2.63152	-1.8583	-2.39489	0.0402991	-0.469101	-0.171949	1.22364	0.910044	1.05224	0.327554	-0.121003	0.802906	0.837925	1.14178	1.17144	0.79219	-0.113684	-0.126824	0.392989	0.0808877	0.500607	0.20569	-0.0613136	-0.121619
30298	SCNM1	opHsV0400006438	1.33676	0.419776	1.20717	2.28271	1.59564	1.08319	0.707234	0.387915	0.478361	0.164195	-0.912862	-0.650349	-0.464434	0.540514	0.381944	-1.36171	-0.225597	-1.8913	-0.941351	0.124039	0.148263	-0.534114	-1.12814	-1.36917	-0.0756687	-0.386876	-0.916126
12559	C3orf54	opHsV0400006859	-1.33459	-0.62391	-0.279869	-2.12711	-1.20087	-2.14067	-0.124535	-1.12598	-0.545264	0.912036	0.612131	0.571874	1.68585	0.464282	1.43093	-0.124652	-0.451754	-0.121682	1.72888	0.558473	0.614421	0.334816	-0.27621	-0.0547245	0.542053	0.484883	0.591191
32266	TACSTD2	opHsV0400001969	-0.453572	-0.72307	0.183806	-1.0932	-2.49305	-0.0943413	-0.273313	-0.962697	-1.12091	1.98822	1.24139	1.67414	0.590685	0.158257	1.11361	0.923579	0.673427	0.694057	-0.54979	0.655417	-0.211792	0.62106	-0.0116505	0.265874	-0.935144	-1.03527	-0.825732
18322	GTF2F2	opHsV0400006137	2.68695	0.526471	0.681993	1.38244	0.983807	1.93627	0.899929	0.348521	-0.0067676	-0.957675	-0.603636	-0.763519	0.208156	0.0623937	-0.0588611	-0.689548	-0.307279	-0.629264	-0.723701	0.871861	0.0269796	-0.452644	-0.788388	-0.906403	-1.10273	-1.34821	-1.27715
21951	MCHR1	H200016069	-1.62582	-0.825498	-2.16035	-0.969744	-0.507113	-0.185891	-0.296717	0.552207	0.291547	-0.797578	-0.907642	0.591982	-0.716072	0.082817	-0.848735	-0.798324	-0.549284	0.233063	1.23669	-0.0981849	1.20143	1.78401	1.57281	1.08156	0.712489	1.12134	0.824994
28855	Q9NZ47_HUMAN	H300001250	0.814602	0.666598	0.45017	2.50524	2.07781	2.11267	0.302345	0.139965	0.43941	-0.389996	-0.788813	-0.352982	-0.0392204	-0.849699	-0.367464	-0.535116	-0.552178	-0.858907	-0.108038	0.570404	-0.102491	-1.48682	-1.12207	-1.34673	-0.0850632	-0.49304	-0.600606
2546	opHsV0400002740	opHsV0400002740	-0.467571	0.728011	-0.245288	-2.09764	-0.355898	-0.505463	-0.826491	-0.977315	-0.627315	1.28766	1.10463	1.74033	1.73164	2.29378	0.943187	0.19713	-0.195616	0.377872	0.0393052	-0.741674	-0.535815	-0.778945	-1.14212	-0.495167	-0.274494	-0.173758	-0.00296926
6194	opHsV0400010129	opHsV0400010129	-0.486806	-1.31161	-0.640825	-2.23402	-0.903308	-0.654344	-1.16458	-0.726139	-1.21329	0.159221	-0.0148561	-0.770625	0.714656	-0.46217	-0.811858	1.95069	1.11611	1.21795	1.54891	0.833604	0.664825	0.699176	0.116853	0.416659	0.745373	0.560214	0.650195
31483	SNRPN	H300021855	0.0481122	-0.504422	-0.643406	-2.51186	-1.58811	-1.11931	-1.11712	-0.65217	-1.31092	-0.602499	0.625186	1.02055	1.00899	0.394508	0.157284	0.374202	2.54156	0.428031	0.097005	0.333632	0.174696	0.203583	0.301014	0.807208	0.908535	0.0674526	0.558268
17071	FGA	H200021184	1.59784	0.234908	0.429995	0.321074	0.333805	0.171922	1.07453	1.27845	0.664855	-1.50666	-1.35302	-1.83907	-1.46073	-1.97515	-1.57529	-0.044292	0.480999	-0.0925644	0.543299	-0.618806	-0.181874	0.945722	0.946713	0.672437	-0.077779	0.48846	0.540222
13350	CCDC67	H300008513	0.28265	1.89907	1.86338	0.942068	1.46793	1.30515	1.53415	-0.360179	0.40992	-0.365137	-0.962858	-1.14774	-1.12775	-0.676692	-0.417989	-0.924575	-0.228778	-0.348734	0.410409	0.992328	-0.684089	-0.316989	-0.103036	-0.485366	-1.86147	-0.324	-0.77168
24370	NP_937824.1	opHsV0400000697	-0.385232	0.695499	-0.769301	-2.71302	-1.33552	-1.74409	-0.706425	-0.855179	-0.457908	0.992355	1.58739	1.60754	1.35607	1.33356	0.480585	0.282281	0.287444	0.271967	0.749345	-0.258049	-0.361631	-0.405448	0.0467828	-0.0272934	0.0109415	0.164394	0.152943
29060	RAB3C	H200014310	-0.837861	0.104178	-0.228527	-2.5458	-1.83717	-1.62238	-0.828833	-0.758746	-0.586529	0.944478	0.721191	1.39707	0.792714	1.97617	0.32514	0.762466	-0.0621659	-0.0154172	0.765798	-0.680917	-0.282162	0.677483	0.475038	0.471338	0.292089	-0.0700361	0.651394
29892	RPP14	opHsV0400006234	1.41024	-0.489034	1.064	1.58598	1.87129	0.992672	0.891851	1.38267	0.156371	-0.739724	-0.38011	-0.859901	-0.408112	-0.943006	-0.60631	-1.17684	-1.48223	-0.816666	0.652922	1.49382	-0.131017	-0.076246	-0.719467	-1.18222	0.0134444	-0.559021	-0.945364
26808	PPP2R1B	H300019493	0.649442	-0.0783384	0.195886	2.56277	1.94084	1.86743	0.34139	0.419022	0.159436	-0.0131028	-0.318451	-1.16658	0.316921	0.557694	0.551492	0.0907863	-0.0238197	0.35118	-1.1868	-1.42855	-1.10884	-1.20526	-1.10419	-1.06498	-0.519963	-0.291833	-0.493568
32885	TMED8	H200014420	-1.17726	-1.15749	1.16838	0.966593	-0.334338	0.284013	-0.407676	-0.903546	-1.0338	-0.535981	-1.13032	-0.392173	-0.211052	-0.379394	-0.707002	-1.26121	-1.02047	-0.988814	1.16887	1.63536	1.04444	1.38354	2.06509	0.891608	0.00951763	0.718333	0.304785
12056	C19orf44	H300018741	-0.578195	-2.2143	-1.05747	-1.77261	-0.755909	-2.49491	0.148975	-0.677873	0.037282	0.651559	0.84607	0.361053	0.960706	0.840869	0.720193	0.909117	0.125886	0.704418	1.6422	-0.551443	0.226365	-0.238529	0.776428	0.608903	0.134349	0.0448374	0.602028
24523	NPAT	opHsV0400000446	2.64591	0.0784003	1.70883	1.73273	1.77564	0.0269766	0.156022	0.582613	0.0747912	-0.794508	-1.27242	-1.9255	-1.05988	-0.452746	-0.0717165	-0.929682	-0.754619	-0.293218	0.266166	-0.405431	-0.159576	-0.115025	0.299322	-0.335877	-0.453976	-0.192153	-0.131065
31271	SLC9A3R2	H200011144	-1.52056	-0.0315597	-1.4477	-1.24775	-1.06071	1.11141	-0.391508	-1.28461	-0.467727	1.41419	0.570447	0.95768	0.283522	1.10358	0.651921	0.988342	1.23838	2.10232	-0.682026	0.706384	-0.843007	0.189893	-1.01778	-0.933748	-0.2815	-0.215133	0.107254
33732	TTC35	H200013966	1.41214	0.72037	0.480646	2.30606	2.08116	1.63295	0.36583	0.146512	0.366815	-1.14019	-1.3342	-1.31323	-0.499103	-0.240885	0.0239882	-0.350009	0.0890919	0.0152588	0.0751389	0.552889	-1.08361	-1.02218	-1.1426	-1.04823	-0.144876	-0.45728	-0.492476
34706	WWC3	H200010103	-0.46318	-0.184878	1.23911	0.908506	0.699345	0.698773	0.0465321	1.12202	0.325432	0.599588	0.280753	1.015	-0.367543	0.386814	0.288178	1.00601	1.04239	0.860618	-0.915489	0.654728	-2.43122	-0.493231	-1.1031	-2.10364	-0.815058	-1.092	-1.20444
29075	RAB43	opHsV0400007518	0.160319	-0.567189	0.863707	-1.28006	-1.12846	-0.769014	-0.208045	-0.138701	-0.612701	-0.68104	-0.450226	-0.980103	-1.19348	-1.22047	-1.26639	-0.291367	0.554604	-0.228508	-0.625925	0.621356	1.16694	0.895507	2.01324	1.19077	1.07687	1.50689	1.59149
5859	opHsV0400009775	opHsV0400009775	1.09886	1.21408	-0.74	-1.56148	-1.131	-0.360164	-1.15485	-1.2705	-0.947807	1.7501	0.479626	1.26641	0.338466	1.40188	1.42814	0.656304	0.839474	1.35216	-0.653891	-0.203441	-0.732838	-0.391938	0.000739387	-0.593322	-0.885603	-0.396604	-0.80279
13730	CDKL3	H300003707	0.7204	0.38792	1.48999	2.0909	2.11416	2.20651	0.091517	-0.267997	0.00218001	-0.34778	-0.451737	-0.910507	-0.260517	-0.0821406	-0.608563	0.676828	0.269932	0.353205	-0.445689	-0.346834	-0.753751	-0.816115	-0.718131	-0.927158	-1.15567	-0.8995	-1.41145
25869	PDE4DIP	H300017082	-1.33973	-0.747987	0.0969193	1.18837	1.54217	1.39016	0.0194557	-0.100346	-0.0614488	-0.342022	-1.70288	-1.09461	-0.776872	-0.666913	-0.255395	-1.45095	-1.6283	-1.13505	0.0360666	1.22449	0.730295	0.695056	0.929088	1.17257	0.619961	0.75279	0.905109
13973	CHID1	opHsV0400006436	0.273861	-0.230881	-1.81664	-1.62434	-0.588285	-1.13349	-0.822304	-1.8511	-1.33459	-0.324073	-0.455653	1.01445	0.746837	0.637676	1.03407	1.01363	1.39418	1.83245	0.034501	-0.191015	-0.370853	0.692027	0.0307848	0.94016	0.654949	-0.347157	0.790805
17673	GDF10	H200000550	-0.628927	0.378491	-0.973866	-2.36319	-2.31274	-2.12155	-0.359084	-0.503139	-0.310168	0.413617	0.311852	1.01167	1.7412	0.206701	0.637964	1.11642	0.835147	0.447426	0.216375	0.243584	-0.0908903	-0.133696	-0.0522937	0.156752	0.664169	0.77981	0.688365
26013	PFDN5	H300019050	0.464342	1.04495	0.602471	1.95864	2.07264	1.91539	0.384142	0.287044	0.492595	-0.836167	-1.1055	-1.21258	0.0608589	-0.735306	-0.114521	-0.879869	-0.834673	-0.9856	0.18865	1.0085	-0.223134	-1.40317	-1.16345	-1.10879	0.0309424	0.0965003	-0.00490552
10966	ATP2B2	H300020639	-0.478978	0.0888723	-0.455077	-1.91928	-1.49569	-1.50815	-0.22471	-0.318972	-0.326662	1.41716	1.72276	1.63465	1.33933	2.30833	0.874679	-0.0179402	-0.106512	0.0514098	0.368241	-0.194265	-0.643402	0.0532655	-0.343109	-0.420091	-0.416038	-0.540691	-0.44914
28083	Q8N0T1_HUMAN	H300006152	2.20853	0.791863	-0.138503	2.04032	1.53235	1.26695	0.256918	0.487981	0.078827	-0.469463	0.311642	-0.417376	1.03312	0.317522	0.421608	-0.524485	-0.486397	-0.787045	-0.190742	-1.08727	-0.302275	-1.75892	-0.864011	-1.32953	-0.618935	-0.563238	-1.20944
29188	RANBP3L	H200020602	-0.569453	0.596129	-0.285064	-0.787393	-2.14283	-0.775127	-0.632833	-1.00533	-0.236546	1.64012	1.42182	2.54253	0.00121851	1.89478	0.683741	0.241851	0.36734	0.634999	0.316548	-0.793417	-0.411929	-0.384167	-0.446039	-0.396958	-0.479873	-0.520559	-0.473563
19716	IQGAP3	opHsV0400005772	2.08836	0.359537	1.35006	0.226661	0.610747	1.01461	0.689237	0.07727	0.247135	0.340659	-0.0389596	0.19749	0.743611	0.594416	0.113846	0.0191521	0.313756	0.269378	0.264349	0.650263	-0.64755	-1.92744	-1.58559	-1.95894	-1.3765	-1.09724	-1.53832
33980	UBE2R2	H200001982	1.72739	1.16034	0.891321	1.85453	1.89757	1.22847	0.140815	0.0357798	0.580036	-0.477745	-1.06906	-1.36121	0.182472	-0.155681	-0.0580406	-0.434179	-1.04615	-0.478331	-0.106108	0.973498	-1.79943	-1.02741	-0.742307	-0.873743	-0.415072	0.0293602	-0.657115
15622	DNAJB2	H300019423	-0.522617	-0.296021	0.251967	-1.67102	-0.689089	-1.77904	-0.0801644	-0.32299	-0.245397	-0.817825	-0.847105	0.0482182	-1.26031	-1.56978	-1.28538	0.160872	0.732823	0.701117	0.775202	1.16292	0.953727	0.960725	0.648217	0.735341	1.53043	1.25715	1.46804
34251	USP49	H200017907	-1.54051	0.278708	1.86456	0.00169377	-0.493584	-0.213312	0.19669	0.518978	0.792271	-0.822171	-0.801034	-1.45582	-1.91259	-0.677822	-1.1064	-0.908402	-0.979005	-0.191755	0.945118	1.13977	-0.325806	1.54617	0.596292	0.834476	0.728273	1.05058	0.934646
14826	CTDSPL	H200013596	2.23005	0.634297	-0.298422	0.353523	-1.05984	-0.421198	-0.511171	0.624373	-0.203111	-0.560434	-0.305794	-1.24085	-0.99442	-1.52817	-1.05671	-1.27016	-0.958141	-0.919499	0.757419	1.97575	0.999483	0.573432	0.279339	0.0854864	1.21557	0.853444	0.745756
35436	ZNF508	H200012976	1.22582	0.684243	0.782577	2.84089	0.479838	0.394296	1.22891	1.08831	0.792348	-0.0322466	-1.14341	-1.39426	0.230433	-0.318722	-1.27602	-0.463479	0.182111	-0.418853	0.298313	-1.51082	0.575918	-1.03973	-0.932165	-0.981428	-0.373623	-0.440964	-0.47828
23440	NP_001003684.1	H200008793	1.19224	1.23558	1.85996	1.35728	1.23753	1.72083	0.525364	-0.173231	0.559197	-0.639735	-0.748531	-1.18826	0.267295	-0.478151	-0.116264	-0.418876	-0.697061	-0.965468	-0.336674	1.51719	-0.0792383	-0.950588	-0.907847	-1.25942	-0.744711	-0.385952	-1.38246
2157	opHsV0400001238	opHsV0400001238	-0.733777	0.150297	-1.25002	-1.46968	-2.25016	-1.99191	-0.201031	-0.602684	0.0546434	0.64154	0.215804	0.280246	0.799717	0.0696298	1.07545	1.65501	1.63312	1.82188	-0.821102	0.144743	-0.308577	0.482413	-0.0851782	0.251792	0.186228	-0.0412222	0.292838
14999	CXorf9	H200005436	-1.45767	-0.579358	1.0501	-1.29886	-0.837228	-0.205765	-0.359442	-1.40875	-0.634358	-0.823684	-0.578194	0.207504	-1.98479	-0.9399	-0.580038	0.0103195	0.723766	0.247817	1.14987	1.43528	1.35083	0.997068	1.04188	1.13903	1.09375	0.356066	0.884766
32484	TCF12	H200003059	1.88719	0.466455	0.375265	2.96677	1.57449	1.40351	0.0165947	0.507817	0.250131	-0.754492	-0.540164	-0.823925	0.220087	-0.275001	-0.383105	-0.178665	-0.191819	-0.782827	0.400326	-1.39198	-0.264548	-0.543378	-0.661632	-1.11798	-0.770259	-0.301951	-1.0869
10471	AP3M1	opHsV0400004515	0.417784	0.573646	1.42449	2.08313	1.55589	1.54809	0.196245	0.391243	0.338675	0.774214	-0.589936	-0.838446	0.17794	-0.312968	1.32879	-0.162134	-0.17073	-0.807851	-0.89129	0.344805	-1.67628	-0.932716	-1.63416	-0.848323	-0.703155	-0.875451	-0.711508
19861	IWS1	H300017234	-0.797588	-0.445186	1.68904	0.859789	1.52328	2.13182	-0.0612166	0.0643585	0.37769	-0.940317	-0.963646	-1.29874	-1.32013	-1.60729	-0.910204	-0.745901	-0.673776	-1.03631	-0.116681	1.5686	0.774514	0.38654	0.421525	0.306814	0.50054	0.268166	0.0443018
8353	opHsV0400012573	opHsV0400012573	1.2441	0.0104228	0.181335	1.54144	0.00584424	0.28195	0.925688	2.01043	1.37092	-1.14365	0.0548955	-1.03969	-0.871605	-1.20564	-2.51157	-0.721653	-0.35117	-0.994686	-0.398567	-0.472693	-0.368084	0.744967	0.743475	0.725473	-0.240184	0.635986	-0.157741
12940	CA2	H200014027	-0.458626	0.234532	2.72528	1.07514	1.18974	1.47331	0.548385	0.61423	0.850114	-1.12803	-1.53055	-1.22421	-1.42277	-1.22424	-1.01111	-0.222749	-0.131039	-0.344387	0.174946	-1.33643	-0.0895849	0.516918	0.324613	0.244937	0.240462	-0.0198897	-0.0689931
29508	RGS18	H200004871	-1.64569	-1.18459	0.426345	0.407555	0.0149786	0.0425678	-0.924592	-0.465486	-1.22877	1.51655	1.98266	1.59611	1.58727	1.30734	1.35858	0.329506	-0.151631	-0.00768929	-0.0425379	-0.571829	0.015463	-0.547156	-1.01113	-0.214459	-0.826955	-0.741438	-1.02097
29963	RPS7	H300001114	1.05299	0.308148	-0.327564	2.97078	1.60418	1.18467	1.064	0.615142	0.285484	0.216176	0.40708	0.479175	0.0904585	-0.234317	-0.503383	-0.856364	-0.746615	0.00637714	-0.368074	-1.90369	-1.13702	-0.997147	-0.847839	-0.833414	-0.47604	-0.570855	-0.482339
28896	Q9P1E0_HUMAN	H300006118	1.23385	0.153299	0.341967	2.81212	1.91884	2.44812	0.375815	0.00930143	0.225346	-0.847137	-0.710467	-0.946082	-0.0486704	-0.655783	-0.437499	-0.26737	-0.294944	-0.317732	-0.498371	-0.0779825	-0.906088	-1.1117	-0.526579	-0.650276	-0.540016	-0.227996	-0.453954
13743	CDKN3	H300013149	1.42847	1.55195	-1.03008	0.654095	-0.0239593	-0.108185	1.16962	1.11261	0.817083	0.885648	0.854748	0.634847	-0.687228	0.00827702	-0.391835	0.998052	0.983775	0.615817	-1.0862	-1.52866	-0.457534	-0.940809	-0.232281	-0.983025	-1.70125	-1.01926	-1.52468
10156	ALKBH8	H300014646	0.160647	-0.32458	-0.0756843	-0.567435	0.417904	-0.154088	-0.100997	0.651821	0.919912	-0.614588	-1.17963	-1.57756	-0.924971	-0.154499	-0.356019	-1.92198	-1.26139	-0.680787	0.479137	-1.23279	1.88587	0.98057	1.64344	1.07298	0.781673	0.919486	1.21356
33306	TP53	opHsV0400005440	-0.520581	-0.82409	-1.92751	-0.147402	0.600212	-0.0851738	-1.9837	-2.23023	-2.05454	1.07653	0.675824	1.33758	0.236858	1.31251	0.231363	0.447239	0.530372	0.953048	0.530828	0.503376	0.413274	-0.118316	0.294359	0.141402	0.373053	-0.195754	0.429468
34768	YARS2	H200004983	2.26348	0.59956	0.879747	1.71806	1.85518	1.46766	0.50373	-0.321166	0.413013	-0.739134	-1.06695	-1.307	0.451913	0.0864376	-0.00478438	-0.394991	-0.192005	-0.092683	0.135115	-0.344771	0.101144	-0.961399	-1.20166	-1.05944	-1.15732	-0.289844	-1.3419
20928	LEPROT	opHsV0400005968	0.46195	-0.569628	-0.306179	1.01476	1.18488	0.744872	-0.468919	-0.415321	-0.276573	1.31326	0.880236	0.806244	0.703092	0.77854	0.656524	0.75835	0.829694	0.751079	-2.38314	-0.0859531	-1.32794	-1.62877	-1.67092	-1.53172	-0.376613	0.0205638	0.137635
33183	TNFRSF17	H200000641	1.09259	0.606709	-0.198251	2.06406	1.24843	1.7182	0.952301	1.21161	0.827988	-1.12362	-0.891605	-1.00102	-0.920935	-0.284448	-0.477853	-0.0725592	-0.0523083	-0.0302714	-1.22471	1.25555	-1.85568	-0.533024	0.0638437	-0.530894	-0.828776	-0.664581	-0.350746
30985	SLC25A30	H300021442	-1.30351	0.858041	1.30345	1.25602	1.61691	0.716808	0.73871	0.342702	0.839262	-0.344918	-1.92667	-1.03702	-0.796883	-1.01586	-0.51591	-1.05875	-0.89696	-1.72449	0.915092	0.798085	0.332332	-0.424213	-0.257124	-0.514985	0.519752	1.25848	0.321652
22487	MRPS18C	opHsV0400006299	0.841872	0.428285	1.04871	2.02344	1.4986	1.86399	0.71307	0.805143	0.227239	-0.271468	-0.769491	-1.59378	0.891081	-0.225269	-0.026346	-1.00772	-0.864089	-1.88458	0.245624	0.175418	-0.0467918	-1.11572	-0.673386	-1.11017	-0.0901664	-0.522419	-0.561058
12931	C9orf97	H300019468	0.908672	0.258654	-0.183334	2.04887	1.83771	0.33114	0.682428	1.12998	-0.039053	-0.122467	-0.801262	-1.25305	-0.0983037	-0.580612	-0.615579	-2.05243	-1.83309	-1.74767	-0.537664	-0.265781	0.612217	0.532531	0.707868	0.524846	-0.133561	0.257016	0.431922
18483	HCFC1	opHsV0400004300	-1.01016	-1.92336	-0.282221	-0.476992	0.257749	-1.2883	-2.3681	-1.65796	-0.573752	1.13918	1.11259	0.988739	0.84978	0.339361	0.452116	0.384798	0.587715	0.495758	0.925583	-1.53198	0.345027	0.858408	0.638394	0.531303	0.347902	0.547516	0.310906
34039	UBXD7	H200012667	1.30487	-0.300043	2.32113	1.88083	1.39323	0.365745	0.505825	1.36961	0.583313	-0.40525	-0.230938	-1.18774	-0.226603	-0.0859549	0.0944924	-1.62472	-0.918603	-1.32104	-0.52671	0.395357	-0.286341	-0.998405	-0.99663	-1.08399	0.252396	-0.256565	-0.0172638
15273	DDX26B	H300020995	-1.35868	-0.228199	-0.332911	-0.623722	-0.709136	-0.581559	-0.773667	-0.536494	-0.401687	1.55942	2.20435	2.22416	1.41065	1.87954	1.00431	-0.0600804	-0.252334	-0.48906	0.185025	-1.03853	-0.410357	-0.337627	-0.357239	-0.587	-0.544571	-0.18033	-0.664264
13588	CD83	H200006646	-0.979331	0.201765	1.9063	1.33107	1.27869	1.38476	0.0409199	-0.316712	0.531748	-1.40832	-1.47847	-1.39025	-0.920359	-1.61338	-0.502229	-0.480151	-0.892827	-0.812779	0.167077	1.72061	0.107205	0.128469	0.0963603	0.167206	0.715399	0.306521	0.710716
10234	AMPD3	H200007072	0.0873034	-0.360953	1.4643	1.77072	1.70862	2.04825	0.520577	0.112034	0.752366	-1.18892	-1.70775	-1.49806	-0.799814	-1.29948	-0.268333	-0.424251	-0.445035	-0.758423	-0.534942	1.22951	-0.89046	-0.0817266	0.0192819	0.0458681	0.10165	0.222762	0.174889
23031	NDUFB4	H300018531	0.947366	1.64175	1.06955	1.1965	0.485271	1.0442	1.04051	0.900867	0.692851	-0.747509	-1.51818	-0.483079	-0.331489	0.208008	-0.220002	-1.27638	-1.603	-1.19581	1.5819	-0.116058	-0.821403	-1.26925	-0.966299	-1.07836	0.489893	0.0859868	0.242177
17204	FLOT2	H200014288	-0.446586	-0.73986	-1.6286	0.29397	0.316807	-0.396709	-1.74827	-1.8151	-1.2032	0.716514	1.45223	1.52177	0.449009	-0.122994	0.24503	1.53059	1.37654	1.74608	-0.20865	-0.351189	0.211917	0.106208	-0.122961	0.137456	-0.104606	-1.29692	0.0815265
32061	STX3	H200006914	0.125499	0.545112	2.58652	1.1632	1.66201	-0.162381	0.120782	1.06532	0.567827	-0.49597	-1.03765	-1.32874	-0.907864	-1.25672	-1.12117	-0.823688	-1.04948	-0.705365	-0.660732	1.92092	0.140522	-0.257067	-0.126054	-0.283485	0.13228	0.176182	0.0102011
11603	C10orf39	H200011432	1.25842	-0.549944	-0.00391515	-1.15013	-0.142173	0.0479489	0.15345	0.059498	0.734856	-0.605733	-1.13695	-1.122	-1.62834	-0.539158	-1.58055	-0.0107384	-0.987736	-0.836663	0.273062	0.509667	0.807217	-0.509149	1.59173	1.09711	2.27888	1.06114	0.930198
25347	OR7E24	H300006604	1.02949	-0.766467	0.816418	-0.337333	0.255138	0.134263	0.212335	0.0138441	0.346975	-1.52289	-1.20555	-1.23347	-1.39525	-1.63874	-1.40599	-0.4373	-0.0460044	-0.0857051	0.510489	-0.871487	1.0827	0.888019	1.26622	1.51861	0.164099	0.789458	1.91815
34198	USP12	H300003319	0.0926867	0.171061	0.743646	2.52558	2.17627	1.80874	-0.00441921	0.115868	0.364297	-0.515105	-0.862723	-1.58275	-0.596928	-0.888057	-0.593844	-0.961978	-1.1357	-1.35054	0.722345	0.849904	0.259992	0.164298	-0.192456	-0.294673	-0.345847	-0.237922	-0.431746
27168	PSMB1	H200006187	0.888402	0.433687	0.311501	2.36765	2.60002	2.18298	0.235522	-0.0992237	0.471841	-0.820977	-0.021845	-0.0379707	-0.571537	0.0300207	0.0333875	-0.644414	-0.729868	-0.543962	-0.284066	-0.798617	-0.749144	-0.919798	-0.797781	-1.33715	-0.360716	-0.0823785	-0.755567
34168	UQCRQ	H300002330	1.26025	1.06544	0.635484	1.68564	1.9425	2.35851	0.270532	0.034849	0.144733	-0.146723	-0.620976	-0.603489	0.558948	-0.617056	-0.155057	-0.381235	-0.556395	-0.805413	-0.0606008	0.699151	-0.402355	-1.37963	-1.22606	-1.4285	-0.648814	-0.522741	-1.10099
26614	POLRMT	H200013913	-0.0985403	0.145906	-0.584465	-2.31176	-2.04125	-1.31897	-0.555525	-1.29495	-0.190504	0.0897925	1.01417	1.01002	0.787861	0.4366	0.319219	1.21824	1.54444	1.83689	0.401647	-0.935369	-0.681923	0.418526	0.419533	0.258738	0.408918	-0.221512	-0.0757369
14735	CSDE1	H200016501	0.0859357	0.40238	1.53886	2.35222	2.30868	2.09416	-0.342132	0.467378	0.463886	0.352725	-0.202962	-0.334128	-0.154089	-0.700922	-0.251267	-0.796232	-0.53644	-0.560061	-0.00482162	-0.494437	-0.933049	-1.44859	-0.706904	-0.921062	-0.476219	-0.775791	-0.427121
12510	C2orf44	H200003419	-0.658615	0.630269	0.941152	0.016402	0.324032	0.977476	-0.245058	-0.568218	0.102001	1.38764	1.31013	0.487513	0.910661	1.43223	1.02842	0.463579	0.222779	0.145832	-0.101754	0.430205	-0.848818	-0.723792	-2.39569	-1.77047	-0.776896	-1.12999	-1.59101
19282	IDE	H300012227	1.13153	0.0736896	1.2143	2.06289	1.1109	2.42639	-0.00444778	0.3202	0.219123	-1.07805	-1.04822	-1.61564	-0.55816	-0.733887	-0.883954	-1.27245	-1.17712	0.450759	0.0660533	0.393797	0.582639	-0.996262	-0.503191	-0.445646	0.0811281	-0.0400818	0.223697
1661	H300014430	H300014430	0.178088	0.701575	0.456125	-0.663464	-0.144848	-0.928586	0.330352	-0.281291	-0.481268	-0.819313	-1.23225	-0.505562	-0.504666	-0.614666	0.890656	-1.45814	-1.15452	-2.40742	0.0872775	1.6935	1.2735	1.12319	1.20468	0.940197	1.3074	0.297463	0.711995
16521	EXOSC1	H200002376	1.17673	0.705229	0.731211	1.01419	2.0272	2.2084	-0.11346	0.887129	0.842087	0.0929914	-0.69464	-0.993668	-0.2201	0.290636	-0.263047	-1.66029	-0.696703	-1.462	-1.06626	0.142009	-1.64975	-0.735396	-0.0618954	-0.63731	0.205321	0.215731	-0.284346
25654	PAX2	H300018793	-0.944431	-0.556627	0.383031	-1.01061	-0.216594	-0.350503	-0.0648956	0.203106	0.405011	1.76731	1.97676	1.209	1.1478	0.873788	1.16078	0.314646	0.437928	0.229805	-0.357847	0.707369	-1.4528	-0.883936	-1.92146	-1.80093	-0.376064	-0.406484	-0.473141
22437	MRPL28	H300003922	-1.12759	0.218023	-0.174889	-2.54616	-1.89977	-1.96596	-0.668194	-0.847829	-0.315957	0.370796	1.49509	1.72343	1.06983	1.03032	0.235287	0.168374	-0.0993346	0.371356	0.93669	-0.0252022	0.164659	0.0586849	0.258208	0.575612	0.418639	0.284069	0.29181
26471	PLXNB2	opHsV0400004592	-0.194806	-0.552219	0.150075	-2.6165	-1.68753	-1.90532	-0.481672	-0.764672	-0.914431	-0.370506	0.764138	0.598889	-1.05538	-0.244607	-0.210959	0.511614	0.848755	0.839707	0.311302	0.404539	1.00838	0.827491	0.725343	0.789473	1.33311	0.890116	0.995667
11165	BAG5	H200001058	0.373851	0.376461	-0.0824085	2.66286	2.48594	1.73735	0.505535	0.852208	0.49442	-0.78592	-0.413827	-0.929682	-0.502072	-0.684127	-0.441704	-0.92064	-0.439535	-0.928927	0.00302096	-1.09074	0.359716	-0.99693	-0.53764	-0.995497	0.0624576	0.156465	-0.320627
9598	ABI1	H300019457	0.930439	0.2846	1.47476	2.09642	1.19	2.1212	0.10245	0.127473	0.403162	-0.881825	-1.00953	-0.792565	-1.22221	-1.12324	-0.626447	-0.470174	-0.822341	-0.73327	-1.61446	1.56125	-0.0766939	-0.255242	-0.133538	-0.305708	0.197357	-0.301605	-0.120268
28915	Q9P1K7_HUMAN	H300007011	-0.491157	0.0723178	0.335461	-2.61187	-1.3926	-1.72793	-1.0925	-1.00722	-1.46853	0.807866	0.611511	0.859357	0.610697	0.713665	0.320449	-0.0750041	-0.34761	-0.265093	1.65297	-0.132338	1.30248	0.492957	0.763619	0.920232	0.509034	0.315406	0.323817
22522	MS4A5	H200008303	0.692148	-0.14735	1.49592	-0.15738	-1.41976	0.99709	0.22557	-0.101169	0.215262	-1.41127	0.0356356	-0.908333	-1.67855	-2.23372	-0.395108	-1.07304	-0.569018	-0.774816	0.835814	1.42331	1.11736	0.5599	0.933186	0.41866	0.023309	1.20458	0.691778
2553	opHsV0400002760	opHsV0400002760	0.18591	1.04503	0.285721	2.66541	2.19073	1.45759	0.761283	0.161152	0.780177	-0.399863	-0.580959	-1.00879	0.296614	-0.36167	-0.127025	-0.600134	-0.687684	-1.17778	-0.296626	0.649258	-0.892493	-0.9737	-1.24209	-1.20486	-0.250646	-0.195824	-0.478742
29689	RNF139	H200003827	0.219482	0.15301	0.391118	1.71927	2.57828	2.03715	0.445251	0.987827	0.722131	-0.499785	-0.574483	-0.918534	-0.502776	-0.767757	-0.0646697	0.324511	0.164285	0.201404	-1.5225	0.171649	-1.05932	-1.42072	-1.13899	-0.968136	-0.194133	-0.298442	-0.18513
34134	UNG	H200006562	0.0823871	-0.421162	1.37355	1.72719	1.43838	-0.104894	0.828252	1.08291	0.768078	0.203361	0.101481	0.0124255	-0.0391063	-0.266543	0.0462458	0.45093	0.690783	1.22316	-1.1993	-2.34342	0.209299	-1.71561	-1.17421	-1.30319	-0.558795	-0.863785	-0.248406
34764	XYLT2	H200004143	-1.01673	0.357948	-0.819227	-1.9749	-1.4017	-2.17923	-0.31949	-0.556212	-0.0265206	1.57441	1.35625	1.94348	0.893594	1.51631	0.715288	0.242701	-0.119392	0.423517	0.667029	-0.129212	-0.348358	-0.0781304	-0.634365	-0.181618	0.0920799	-0.273258	0.27572
17403	FUNDC2	opHsV0400007048	-0.0233659	0.55119	0.250523	2.3634	2.08995	2.03604	0.669271	0.726588	0.673736	-1.87441	-1.38948	-1.22437	-0.355578	-0.501396	-0.451487	-0.254832	-0.396913	0.0999538	0.127747	0.175016	-0.785849	-0.659404	-0.86169	-0.618082	0.00486192	-0.349996	-0.0214117
2992	opHsV0400004438	opHsV0400004438	0.251379	-0.228508	0.759854	1.93632	2.0429	2.65733	0.187403	0.167534	-0.0629167	0.579635	0.334541	0.0871197	0.0801913	0.371208	0.244782	-0.187781	-0.153446	-0.352277	-0.782496	-0.332683	-1.28756	-1.34818	-1.33884	-1.16641	-0.715836	-0.74905	-0.994222
27844	Q6ZRH2_HUMAN	opHsV0400001396	-1.23686	0.000181576	1.38777	0.0880525	0.150669	0.497003	0.411476	1.26211	0.179744	-0.868195	-0.429061	0.363216	-0.754466	-0.771931	-1.71866	-2.03448	-1.29076	-1.77762	0.179744	0.830269	0.150842	0.359866	1.52519	0.664589	0.922623	0.909981	0.998705
25112	OR2D3	H300001581	-0.429839	-0.484382	-0.197486	-1.37389	-1.17278	-1.12152	-0.87204	-0.440847	-0.200425	-0.520357	1.14298	-0.24047	-0.152201	-0.738807	-0.653017	-1.32606	-0.267951	-0.304571	3.21928	0.449578	0.94438	1.15398	0.815948	0.910013	0.70237	0.466936	0.691177
10340	ANKRD27	H200005354	0.045303	-1.52524	-1.05278	0.515556	0.492343	-0.511332	-0.0992186	-0.562487	-0.646411	0.858928	1.90785	0.836881	1.05035	0.809939	1.06471	0.922458	1.14015	0.817739	-0.854703	-1.98848	0.027031	0.197153	0.634757	-0.230624	-1.28419	-1.54578	-1.01991
32836	TM4SF4	H200002040	0.0407062	-0.0513869	-1.27814	-0.847502	-1.15273	-0.552136	-0.383005	-0.429568	-0.211555	-1.1602	-1.15779	-0.848691	-0.638554	-0.0635649	-0.380404	-0.183993	-0.107706	-0.132726	2.21822	-1.24867	1.1947	0.964803	1.04704	1.90158	1.12599	1.34515	0.990142
4849	opHsV0400008482	opHsV0400008482	-0.880225	-0.245946	0.0998826	-1.66695	-1.52833	-2.01298	-0.709548	-1.00985	-0.994432	0.871583	0.891154	1.90876	0.270245	2.18393	1.14377	0.27246	0.183856	-0.387924	0.980849	-0.135811	-0.211076	0.65974	0.332695	0.253888	0.259871	-0.15011	-0.379492
1498	H300012007	H300012007	0.142433	0.408478	0.353211	2.52295	2.00814	2.09444	0.280992	0.898822	0.41978	-1.85576	-1.10586	-1.15748	-0.260964	-0.398894	0.0496316	-0.843672	-0.759099	-0.630094	-0.105594	-0.692342	-0.606931	-0.661726	-0.61243	-0.207989	0.183497	0.38347	0.152994
17202	FLNC	opHsV0400010166	-0.055772	0.329944	-2.30155	-1.61089	-0.937081	-2.1901	0.0538989	-0.596028	-0.554243	1.03786	1.15263	0.864316	1.94796	0.241204	0.752614	0.982344	0.679558	0.952201	-0.87448	-0.513284	-0.160314	0.184293	0.430666	-0.235185	0.184439	-0.30693	0.54192
13663	CDC73	H300009459	2.01827	0.573635	0.482907	1.12484	1.86884	0.252477	0.13186	1.22194	0.815659	-0.985078	-0.924985	-1.94835	-0.0774733	0.0464777	-0.445389	-1.1156	-0.962591	-1.60001	1.06098	-1.17152	-0.344794	-0.39	-0.263974	-0.638312	0.407351	0.538025	0.324816
18389	GYS1	H300011423	-0.607069	1.29947	-1.17293	-1.68795	-0.869593	-2.09021	-0.200045	-0.276005	-0.398647	1.13579	1.50659	2.07682	1.2317	1.23549	0.615003	0.64761	0.305352	0.668782	-0.962768	-0.647231	-0.333051	-0.149058	-0.259831	-0.035048	-0.0486683	-0.611065	-0.373441
13832	CENTB5	H300015290	0.450963	0.413289	-0.254596	-1.04538	-1.30192	-0.849648	-0.724361	-0.605011	-0.814546	1.3416	1.18999	2.6803	0.77361	2.20999	0.484165	0.474462	-0.0599799	0.446589	0.28249	-0.295143	-1.21516	-0.298638	-0.626309	-0.4679	-0.80361	-0.730248	-0.655
29179	RAN	H300010237	1.69156	0.181337	-0.203761	1.78694	2.05862	2.1854	0.413997	1.17913	0.131239	-1.19088	-1.18605	0.150349	-0.186961	-1.43524	-0.653918	-0.987434	-0.056206	-0.453748	0.21646	-1.02012	0.222103	-0.775122	-0.436552	-0.706071	-0.269758	-0.257282	-0.398039
20444	KIRREL2	opHsV0400000389	-0.6328	-0.0525771	-0.128368	-1.01475	-1.49303	-0.549841	-1.02224	-1.12438	-0.44387	2.27833	1.07628	2.15087	1.50963	0.756209	0.827734	0.30472	0.138793	0.268082	0.143108	1.06676	-0.617537	-1.50709	-0.467728	-0.795835	-0.19378	-0.19898	-0.277705
11868	C14orf73	opHsV0400007060	-1.0391	-2.36029	-0.311071	-0.424729	-0.57527	0.0593793	-0.447922	-0.730387	0.106558	1.74639	1.76885	1.90253	1.95396	1.01924	0.688625	0.0380073	0.0743229	0.282107	-0.740446	0.378119	-0.965763	-0.288847	-0.544486	-0.247803	-0.204895	-0.674971	-0.462108
16877	FAS	H300021799	0.408063	0.02507	0.0849521	2.50789	2.40585	1.34179	0.445185	0.287046	0.572482	-1.19515	-1.13054	-1.63402	-0.712872	-1.13421	-0.83115	-0.575291	-0.498134	-0.727544	0.0241616	1.0912	-0.672753	-0.0853142	-0.16788	-0.210669	0.423356	0.461463	-0.502978
16559	F12	opHsV0400000213	-0.904849	1.46114	-1.03032	-0.760435	-0.861159	-0.656014	-0.370551	-0.327372	-0.677813	1.79892	2.12362	2.0603	1.37612	1.4093	0.380325	0.0993303	0.176808	0.0909261	-0.421288	-0.377819	-0.767939	-0.858569	-0.576097	-0.647264	-0.603248	-0.396447	-0.739615
14592	CR030_HUMAN	H300009766	0.504613	1.32408	-1.05781	-1.58336	-1.32894	-1.12391	0.0107917	0.406615	0.157694	0.952469	1.4886	1.51248	0.47502	1.70187	0.692209	0.905461	0.943247	0.603983	-0.508095	-1.38598	-1.21289	-0.112341	-0.673767	-0.468322	-0.794633	-0.525256	-0.903834
23509	NP_001008396.1	opHsV0400008185	0.18832	-0.0264493	-0.988804	-0.806407	-0.97657	-0.417461	-1.36426	-2.09239	-1.60867	-0.280702	0.805102	1.9076	1.09701	1.07785	0.591638	0.899644	1.19635	1.13364	0.248992	1.09905	0.388921	-0.551219	0.0152551	0.356068	-0.231846	-1.32489	-0.335775
20582	KPNB1	H200008434	-0.608437	1.05419	0.798591	2.34847	2.00998	1.79805	0.380294	0.521449	0.528292	-1.62151	-0.973186	-0.837209	-0.245804	0.0238876	-0.48938	-1.38866	-1.01965	-1.00016	0.731761	-0.766451	-0.048096	-0.342592	-0.242438	-0.510363	-0.096546	0.371558	-0.376038
26309	PLA2G2D	H200014434	-2.17104	-2.90281	1.00505	-0.930855	-0.809338	-0.640557	-0.712791	-1.18286	-1.16228	0.439223	0.535916	0.754106	0.257178	0.618816	0.538288	0.983286	0.39714	0.958168	0.302301	-0.32529	0.118744	0.706988	0.768076	0.741661	0.587207	0.577378	0.548298
30884	SLC16A3	H300006911	0.604291	0.861021	1.01008	-0.502956	0.133777	0.171491	0.789495	0.24663	0.796176	-1.84648	-1.27968	-0.903988	-1.64978	-2.47419	-1.78626	-0.214583	0.590067	0.0491121	0.549387	1.11327	0.256477	0.340711	0.350678	0.730907	0.730794	0.387117	0.946429
35639	ZNF7	H300016955	0.133032	-0.0753825	-1.20039	-0.216605	0.0177454	0.102098	-0.783292	-0.413318	-0.573699	-0.824387	-0.681392	-0.894239	-0.442955	-0.450899	-0.812455	-0.848951	-0.499315	-0.885206	3.67805	0.153924	0.618421	1.10529	1.14645	1.19089	0.541944	0.396947	0.517694
32048	STT3B	H300017349	0.85343	-0.0583258	0.322499	2.31124	1.93779	2.60967	0.294413	0.49492	0.319901	-0.48011	-0.0727999	-1.06362	-0.258078	-0.330314	-0.00412876	-0.0577797	0.133825	0.12533	-0.607996	-0.401273	-1.74333	-1.07532	-1.04155	-0.933189	-0.482615	-0.481241	-0.311348
10932	ATP10A	H200004724	0.501511	0.482978	0.622027	0.501877	0.415609	0.692012	0.629427	0.642644	0.512941	-2.20783	-1.90971	-2.15078	-1.534	-1.59514	-1.37262	0.457271	0.153163	0.617007	0.278431	0.667179	0.658617	0.290115	0.491442	0.795929	0.415614	0.667048	0.27725
28275	Q8N9R0_HUMAN	H300008528	0.378622	-0.575538	-0.114788	-0.0576966	-1.28597	-1.24561	0.85743	-0.235901	1.3557	-0.931622	-0.379547	-1.10658	-0.772016	-1.65445	-1.66251	-0.30557	-0.583531	-0.371166	1.75047	0.237126	0.755621	0.823248	0.784738	0.415596	1.11586	1.86456	0.943529
8786	opHsV0400013062	opHsV0400013062	1.83946	-0.0924619	0.929123	1.77268	1.38885	0.670649	0.035409	0.628634	-1.02391	-0.789957	-1.17016	-1.46905	-0.770304	-0.820426	-0.8857	-1.33107	-1.19611	-0.966412	0.421916	-1.1048	0.368751	0.783035	1.28565	0.567817	0.287546	0.20021	0.440635
12714	C6orf211	H200002519	0.35832	0.456611	0.157241	2.49918	2.26925	2.14721	0.0257991	0.197543	0.485407	-1.06739	-0.524842	-0.995172	-0.971151	-0.695296	-1.30489	-0.829643	-0.784625	-0.721965	0.243556	0.779074	-0.475631	-0.41825	-0.219538	-0.920684	0.0795588	0.0883696	0.14196
12641	C6orf106	opHsV0400009363	0.0994045	0.289342	1.44698	1.84296	1.83256	1.72869	0.785104	0.524281	0.5383	-0.323114	-0.517076	-1.22694	-1.02544	-1.75907	-0.746382	-0.330667	-0.388955	-0.762345	-1.95923	0.606439	-0.336343	-0.496772	-0.693738	-0.142382	0.320014	0.180939	0.513431
19492	IL15RA	H300011432	-1.98236	-0.900757	-0.140156	-1.72227	-1.32352	-1.25611	-1.01951	-0.711557	-0.478962	1.31945	0.176424	1.60732	1.52035	1.14455	0.692529	-0.600355	-0.812121	0.154929	0.87437	-0.508225	0.0702614	0.659728	0.39725	0.714203	0.614836	0.853105	0.656603
32941	TMEM142B	H300015347	-0.525924	0.580781	-1.00307	-0.70078	-1.0389	-1.10656	-0.716567	-0.691051	-0.132024	1.21946	1.98312	2.08112	0.734795	1.31583	1.35832	0.402797	0.136809	0.293473	1.31304	-0.436247	-0.74658	-1.21688	-1.04186	-1.00591	-0.362783	-0.248133	-0.446267
10945	ATP13A3	H300017608	-0.270965	0.0508743	1.6619	1.94168	1.62068	1.17908	0.0437739	-0.036525	0.626155	-1.15862	-1.15439	-1.78593	-0.728096	-1.78065	-0.535189	-0.717032	-0.63272	-0.706466	0.228286	1.55889	-0.592925	-0.208791	-0.0888487	-0.0411164	0.642044	0.333609	0.551291
25999	PEX5	H300020079	0.144088	0.830003	-1.14543	-0.899089	-1.98967	-0.751765	-1.01493	-1.43837	-2.02667	1.39154	1.13338	1.84624	0.81772	1.52588	1.13702	0.0855507	0.0590598	0.251377	0.173757	-0.25258	-0.176153	0.000852315	-0.270976	0.165668	0.0310787	-0.0878051	0.460231
20635	KRT33B	H200004192	-0.457161	-0.122121	-1.75432	0.345576	-1.20384	-0.911039	-2.1617	-2.14964	-1.0141	0.503706	0.110651	0.302763	0.0469557	0.185786	0.364929	0.874669	0.652072	0.360837	0.704481	0.444238	-0.161067	1.46517	-0.370945	1.92912	0.755965	0.487972	0.771042
2342	opHsV0400001942	opHsV0400001942	-0.244012	-0.0780997	-1.16749	-1.51207	-1.56943	-1.19996	-0.632027	-1.55194	-0.374756	0.251561	1.51492	0.879803	0.530949	0.0361325	0.640809	1.5777	1.44137	1.33569	-1.08188	1.88101	-0.589987	0.265858	0.12596	-0.0341936	0.0154639	-0.282926	-0.178466
27490	Q3KNT7-3	H300013740	-1.64651	-0.0778081	-1.76695	0.421172	0.145126	-0.238576	-2.1851	-1.92522	-1.34862	0.667452	0.625295	0.639283	1.28716	0.453629	1.10157	1.00932	0.836983	1.24554	-0.389369	0.215718	-0.00354447	0.708129	0.643215	0.455876	-0.0831746	-0.827244	0.0366493
29226	RASA2	H200015765	-0.554473	-0.0922918	1.13293	1.62007	2.11445	2.12857	0.106272	0.425052	-0.116638	-1.25198	-1.09616	-1.28289	-0.881321	-0.505385	-0.28457	-1.32974	-0.928496	-1.65986	-0.227627	-0.0254549	0.378113	0.483187	0.927754	0.511075	0.182101	0.26435	-0.0370296
25679	PBX3	H300021099	0.175586	0.429317	1.04626	0.40572	0.477122	0.57366	0.833878	0.194064	0.745042	-1.52361	-2.10406	-1.55162	-2.32083	-1.81108	-1.14248	0.23826	0.671778	-0.00610962	0.556907	0.05992	0.67526	0.238063	0.378182	0.356342	0.794069	0.909167	0.701189
14210	CLN3	opHsV0400004375	-0.365892	-0.455671	1.64364	-0.693732	1.04581	1.07657	0.0130197	-0.07544	0.0903308	-1.80096	-1.58195	-0.706822	-1.46989	-2.17438	-0.941971	-0.370503	0.00853	-0.13364	0.930658	1.01314	0.359327	0.318979	0.713715	0.885315	0.992795	0.507556	1.17147
22025	MED9	H200015540	1.07391	-0.30893	-0.00667968	1.76257	2.07965	2.04974	0.966489	0.376724	0.758033	-0.0159583	-1.42185	-1.00075	-0.639038	0.185737	-0.700132	-1.49116	-1.57183	-1.03292	-0.426618	0.822457	0.198939	-0.651093	-0.122598	-0.575352	-0.276369	0.0336299	-0.0665945
32713	THRB	opHsV0400008577	-0.964235	-0.526541	-0.273589	-1.61096	-1.23131	-1.94703	-0.746458	0.152716	-0.741033	0.798315	1.43257	1.37582	1.64429	2.12746	1.41019	-0.235462	0.103186	-0.0492894	0.145827	-1.14143	-0.356754	0.129387	0.18288	0.154164	-0.241285	0.477999	-0.0694346
13814	CENPF	H200006364	0.818356	-0.869387	-0.167032	0.237631	0.517088	0.438143	0.601342	0.72075	0.182731	0.994385	1.43986	1.19417	0.406348	0.651183	-0.212753	0.666079	0.999006	0.609687	-1.24805	-2.83529	-0.750323	0.0236634	-0.0782616	-0.195865	-1.60522	-0.970926	-1.56732
23977	NP_065945.1	H300014276	0.285764	0.599198	-0.0630379	-1.93854	-1.70341	-1.92406	-0.567871	-2.35451	-0.934727	1.11085	0.979798	1.33902	1.29176	0.667415	0.923624	0.318802	0.827166	0.438765	-0.248607	0.286929	0.321679	-0.233364	-0.0663176	0.138918	0.174163	0.400508	-0.0699367
27170	PSMB2	H300007846	1.68469	1.02772	0.476224	2.41887	1.25742	1.81681	0.490128	0.191594	0.0576122	-0.880198	-0.774401	-1.19455	0.465378	0.702285	0.39952	-0.910897	-0.908771	-0.245787	-0.461054	-0.100299	-1.16222	-1.109	-0.989245	-1.08049	-0.384517	-0.203406	-0.583414
25267	OR5AV1P	H300007925	-1.00773	0.0255366	-0.242046	-0.678999	-0.159776	-0.144516	-0.575811	-0.124467	-0.656712	1.63095	1.83404	2.34443	1.38352	2.13644	0.956448	-0.447319	-0.242907	-0.138591	-0.503518	-0.894093	-0.745863	-0.249312	-0.668334	-0.250255	-1.03601	-0.781304	-0.763792
28988	QPCT	H200006611	0.311589	-0.114072	2.75526	0.942966	0.127084	0.91159	-0.326664	-0.312206	-0.0850897	-1.24053	-1.00194	-1.71709	-1.22496	-1.39668	-1.17393	-0.659413	-0.546918	-0.569294	-0.0531447	1.47207	0.0144498	0.727956	0.9212	0.799413	0.464254	0.704473	0.269621
16645	FAM119A	H300020275	-1.09215	0.404725	-0.479405	-1.31536	-1.09728	-1.89872	-1.24645	-0.817706	-0.620294	-0.189803	1.70871	1.92241	1.57603	1.91009	0.511621	0.374725	0.00378531	0.561031	0.898628	-0.31267	-0.178198	-0.408313	-0.533702	-0.43143	0.195106	0.280084	0.274531
22700	MXD4	H200011171	-1.45399	1.10084	-2.8254	-1.2639	-1.47883	-0.810009	-1.10993	-0.841027	-0.868267	0.137608	0.9185	0.950792	0.185185	0.996422	0.339461	0.154308	0.160966	0.758522	0.682076	0.689009	0.935132	0.581012	0.779833	0.521628	0.873967	-0.389335	0.275425
33802	TUBB4	H300005686	-0.0647834	1.03417	1.20511	0.811318	1.07862	0.973514	0.691318	0.712369	0.790594	-1.44417	-2.86691	-0.266862	-1.18674	-0.550498	-0.814318	-0.941723	-0.651078	-0.298506	-0.0979239	1.02406	-0.610612	-0.517662	-0.704741	-0.042687	0.96976	0.5362	1.23217
30347	SDCCAG10	H300021230	2.2223	1.27876	0.516686	2.45865	1.37317	0.0385373	0.801169	0.521381	0.203064	-1.1356	-0.848215	-1.10297	0.0549658	0.0327171	-0.303113	-1.24062	-0.783259	-0.787079	-1.1432	-1.60556	-0.166134	-0.455498	-0.0777349	-0.0667013	0.0198629	0.217381	-0.0229637
11078	AURKA	H300001479	0.983943	0.747608	-0.179213	1.80554	2.21387	1.58351	0.241483	0.74088	0.140521	-0.00209673	-0.0101223	-0.351909	-0.718651	-0.578102	-1.00774	0.87595	0.73477	1.04756	-0.388333	-1.71963	-1.04308	-0.800839	-0.5836	-0.830171	-1.12301	-1.03021	-0.748928
10741	ARP19_HUMAN	H200010090	0.877245	-0.520601	2.01714	1.824	1.52924	2.49816	0.117187	0.734948	0.168738	-0.0326099	-0.309443	-1.08915	-0.0440231	-0.0884819	0.245712	-0.388785	0.0489162	-0.885301	-0.236355	-0.456074	-0.13974	-1.10574	-0.952254	-0.845785	-1.16925	-0.889138	-0.908554
14718	CS029_HUMAN	H200012751	-0.536895	0.453672	1.19218	-1.04773	-0.560363	-1.45941	0.327831	-0.108312	0.585082	-1.04601	-1.84333	-1.47009	-0.934136	-0.646585	-1.06499	-0.223106	-0.174438	-0.23286	1.02952	-0.255932	1.51248	1.42655	0.870636	0.973032	0.685787	1.249	1.29841
26731	PPIL3	H200012281	0.911971	0.142846	0.129556	1.60543	2.4765	2.19591	0.497642	0.712767	0.558535	-0.935697	-1.05246	-0.596084	-0.833822	-0.540934	-0.151881	-1.01905	-0.944895	-0.671042	-0.649924	0.419025	-2.033	-0.155311	0.0135811	-0.0136341	-0.169247	0.123805	-0.0205913
5419	opHsV0400009263	opHsV0400009263	2.41735	0.508908	0.0681157	2.25502	1.24431	1.15338	0.749332	0.276297	0.319121	0.310517	-0.0251555	-0.10662	0.881619	0.0933063	-0.0645768	-1.12033	-0.285138	-1.38437	-1.49752	-0.86636	-0.488646	-0.180785	-0.629402	-0.701438	-0.83544	-1.0429	-1.0486
23346	NOL12	H300018634	-0.0659106	-2.0217	-0.220918	-0.718439	-1.19141	0.191402	-0.758158	-1.17627	-2.73108	1.42915	1.0516	1.42653	0.955635	0.611578	0.151823	0.694765	0.871801	0.586182	0.976466	-0.300076	-0.581357	0.532774	0.558792	0.303029	-0.548951	0.0838569	-0.111109
25688	PCBP3	opHsV0400001529	-1.13646	1.65186	0.256398	0.607832	-0.708577	0.298372	0.0375207	-0.827626	-0.127488	0.840617	1.6384	0.787134	0.681145	1.20693	0.941563	1.04853	0.482108	0.62127	-0.936987	0.310058	-1.58635	-1.0844	-1.96895	-1.36726	-0.383736	-0.232445	-1.04946
23314	NMI	H300001976	1.57418	0.44203	0.494199	2.07086	1.88374	1.73721	0.18404	0.27683	0.256717	-1.7972	-1.78216	-1.66496	-0.174908	0.128563	-0.113729	-0.700497	-0.449888	-0.868708	-0.0177815	-1.05594	-0.177073	0.00830141	0.10901	-0.0129827	-0.059719	0.138395	-0.428547
19013	HS3ST6	H300006729	-0.93377	-0.0713807	-0.166778	-2.32081	-2.60216	-1.63937	-0.435337	-1.05067	-0.12676	1.13465	0.843676	1.05808	0.176858	0.0247847	1.53936	0.517074	0.630014	0.463909	1.37887	0.597749	0.214747	-0.1089	-0.00707986	0.228919	0.350711	0.189741	0.11386
30447	SENP3	H200012165	0.533839	0.129491	-1.62687	-0.632573	-0.423917	-0.105306	-0.577039	-1.53544	-0.445855	-0.76025	-0.348384	-0.463423	-0.88471	-0.92167	-1.66893	0.00463787	-0.239167	0.411421	2.22038	1.64604	1.78871	0.996637	0.723621	0.878143	0.895999	0.175636	0.228988
10673	ARID1B	H300022801	-0.838656	0.884198	-1.51975	0.341135	-0.480615	-0.245835	0.446547	0.680872	0.124741	-2.23684	-0.80226	-0.818916	-1.17907	-1.40074	-0.624357	0.330935	-0.724122	-0.499214	1.65517	0.289279	1.21806	1.46401	1.41134	0.947258	0.456185	0.544713	0.575933
7249	opHsV0400011384	opHsV0400011384	-1.28112	-0.203882	-1.38459	-0.0427334	-0.439057	-0.992557	-0.631201	-0.353158	-0.615419	1.78825	1.68723	2.37983	0.582889	1.32163	0.916182	0.594807	-0.0524757	0.232917	-1.31204	-1.19528	0.240482	0.229554	-0.09757	0.139345	-0.123839	0.0147988	-1.403
31343	SMARCA5	H300005494	1.1447	0.228419	0.512477	2.75611	2.20609	2.04297	0.14998	0.331482	0.163433	0.281866	-0.00584292	-1.04472	-0.59644	-0.354618	-0.441867	-0.90713	-0.720945	-0.435532	-0.394696	-1.05601	-1.08177	-0.492742	-0.866044	-0.791655	-0.166572	-0.18352	-0.277423
16251	EMR1	H300021461	-2.11433	-0.583446	0.194627	-0.246168	-0.107646	-0.130235	-0.749666	-0.749762	-0.638767	1.625	1.85144	1.98606	0.996183	1.93863	1.14386	-0.0401661	-0.176405	0.22313	-0.284134	-0.0957719	-0.981331	-0.822969	-0.868852	-0.516726	-0.0732872	-0.786142	0.00688159
2018	opHsV0400000379	opHsV0400000379	1.79072	0.136003	1.03801	1.41331	2.19688	0.878922	0.354429	1.04938	0.447121	-0.908294	-1.66934	-2.43891	-0.166164	-0.580859	0.0251347	-0.358654	-0.126756	-0.316654	-1.1053	0.0643173	0.328202	-0.0105867	-0.0647602	-0.293031	-0.76287	-0.266802	-0.653445
13446	CCNG1	H200006628	1.7236	-0.224069	-0.130575	2.49403	1.20582	1.24073	-0.48391	0.118007	0.1232	0.00963618	0.542788	-0.119874	0.22401	0.858722	0.547106	0.268289	0.568455	0.462624	-0.790662	-0.631879	-1.12344	-1.97953	-1.22673	-1.3537	-1.07003	-0.689614	-0.562995
11823	C14orf135	H300019130	2.44984	-0.115478	-0.311206	0.120107	1.47352	1.63843	0.991727	1.24756	0.502826	-0.630947	0.299748	-0.515217	1.04533	0.403131	0.52321	-0.495126	-0.0361713	-0.0610024	-1.47378	-0.207229	-0.198428	-1.05168	-1.023	-1.07183	-1.28743	-1.21342	-1.00351
20046	KCNK18	opHsV0400002825	-1.78532	-0.138955	-0.050656	-0.666401	-0.598907	-1.56416	0.0781275	-0.345906	-0.510962	0.663533	1.63432	1.18196	1.71459	0.672951	1.79167	-0.92911	1.1826	1.59665	-1.4645	-0.602375	-0.023324	-0.242463	-0.195478	-0.273302	-0.138421	-0.646639	-0.339528
27834	Q6ZQZ9_HUMAN	opHsV0400000897	-0.674933	-0.14783	-0.663715	-1.9986	-2.1413	-2.1748	0.15123	-0.404721	0.14259	1.36218	1.42737	1.56717	0.996578	1.51241	1.00238	0.423961	0.290029	0.0167248	-0.332096	-0.132825	0.399802	-0.408203	-0.166456	-0.342316	-0.0461503	0.232432	0.109075
26526	PNN	H200004708	0.230655	-0.0631954	0.573395	2.71417	1.72447	2.57588	0.353763	0.62396	0.103583	-0.728995	-0.724699	-1.33764	-0.964896	-1.08729	-0.966831	-0.73887	-0.67627	-0.346257	-0.0331767	-0.980467	0.113828	-0.281398	0.0332628	0.0529434	-0.0994394	0.0770533	-0.147545
8884	opHsV0400013166	opHsV0400013166	0.883225	-0.00987571	1.53834	-1.02911	-0.142595	-0.356704	1.06836	0.787069	0.794598	-1.27774	-1.49007	-1.68698	-1.19528	-1.66026	-0.702939	-0.349123	-0.74571	-0.349393	-0.63723	0.00638517	1.16084	0.430526	1.00958	0.643911	1.0509	0.97659	1.28269
5082	opHsV0400008761	opHsV0400008761	-0.454637	0.205544	0.540245	-2.14147	-0.559746	-1.34725	-0.212153	-0.632147	-0.834356	1.17126	1.4721	1.21047	1.63551	1.53735	1.38628	0.348257	0.126054	0.639461	0.848946	-0.220484	-0.590752	-0.989697	-0.876963	-0.895353	0.132374	-1.12655	-0.372297
278	H200007247	H200007247	0.146582	0.14133	-1.55346	-1.38928	-1.52748	-0.788196	-1.14921	-1.62695	-1.05558	-0.00873021	1.02991	1.36635	0.512695	0.156661	-0.199832	1.25162	2.07857	1.4408	0.181418	-0.154839	-0.286693	-0.0387229	0.315076	0.493143	0.422379	-0.792577	1.03503
11015	ATP6V1C1	H200010203	0.350074	0.335717	1.73542	1.96283	1.76673	1.76924	0.420661	0.358915	0.748711	-0.926763	-1.4867	-1.66134	-0.559828	-0.969525	-0.337747	0.0472356	-0.0614214	-0.0234824	-0.195599	1.09091	-1.04795	-0.788352	-0.840255	-0.782555	-0.213656	-0.226889	-0.464385
16675	FAM128B	H300004445	0.780596	0.0839004	-0.649872	-1.95817	-2.18419	-1.11203	-0.749365	-0.596888	-0.447461	0.172819	1.74818	1.92862	0.853767	1.72685	0.934304	0.479121	0.962624	0.399558	-0.689437	-0.544684	-0.200227	-0.579941	-0.159126	-0.103353	0.210801	-0.0521224	-0.254288
21736	MANEAL	H200001556	-1.04886	0.213621	0.286421	-0.373356	-0.626636	-0.784512	-0.278614	-0.780154	-0.171311	0.929666	1.97607	1.95445	1.51505	2.09258	0.756087	0.276487	0.0468741	-0.0827089	0.394107	0.280257	-1.10858	-1.46489	-0.904226	-1.07775	-0.605296	-0.577819	-0.836959
25763	PCID1	H300020422	1.19616	0.31498	0.309159	2.45119	2.00945	2.10004	0.342836	0.653357	-0.0134861	-0.70023	-0.719972	-1.0109	0.418742	0.504724	0.327417	-0.724105	-0.219361	-0.883639	-0.111767	-1.16966	-0.753535	-0.362445	-0.55819	-0.811392	-0.917498	-0.550242	-1.12163
22645	MTRF1	H300016552	1.28668	0.973773	1.87668	-0.794516	0.9786	0.777365	0.903463	0.900768	0.468301	-0.563957	-1.81439	-1.87862	-0.16127	0.00214002	-0.245537	-1.86588	-0.648432	-1.78345	0.967372	0.534993	0.418864	-0.297709	0.0773065	-0.0193462	0.0839688	-0.161785	-0.015378
11437	BPNT1	H300020828	0.991771	0.40439	2.05029	0.819469	1.28817	0.945215	-0.300788	0.652126	0.0848936	-0.379788	-1.83397	-1.10075	-0.421761	0.0941091	-0.531679	-1.56777	-1.62703	-1.80092	-0.125202	0.345277	-0.397353	0.499146	0.920038	1.02269	-0.610054	0.731489	-0.152017
29175	RAMP1	H200004209	-0.624428	-0.168705	-0.424555	-0.640554	-0.170776	-0.469918	-1.21072	-0.359002	-0.618352	1.52857	1.79507	1.99164	1.68129	1.39108	1.27333	-0.428847	-0.239848	0.570131	0.720451	0.305257	-0.755036	-1.42253	-0.690412	-0.73564	-0.569572	-1.21598	-0.511951
23846	NP_056015.1	H200004133	1.2863	0.12985	0.050168	2.18635	1.91199	1.74617	0.550971	0.7365	0.40212	-1.08281	-0.157584	-0.886575	-0.781559	-0.211357	-0.312822	-1.6916	-1.10834	-1.06655	-0.0559534	-1.28604	-0.80671	-0.586096	-0.468651	-0.184025	0.470683	0.652854	0.562713
25757	PCGF1	H200018886	0.533512	1.6258	0.191122	2.27054	1.35222	1.70673	0.643318	0.278526	0.832808	-0.625894	-1.2029	-0.701047	0.170967	0.512241	-0.112594	-1.32976	-1.29438	-1.4904	-0.362304	0.480277	-0.676514	-0.989689	-1.00641	-0.887231	-0.147161	0.175663	0.0525639
19403	IGHV3-33	opHsV0400005652	-2.32073	-0.489503	0.0327523	-0.578191	-0.977965	-0.329746	-0.450385	-0.309222	-0.504526	1.24169	1.0768	2.28637	0.845354	2.50301	0.838778	0.38816	-0.0461797	0.329665	0.175664	-0.144428	-0.702155	-0.567046	-0.970823	-0.796628	-0.251907	-0.109275	-0.169539
15163	DAZL	H200005830	-0.438203	-0.203453	-0.31359	-1.26284	-1.95235	-0.933991	1.25	-1.56638	-0.381175	1.46724	1.54823	1.40198	1.56184	1.1876	1.59503	-0.0150628	0.170284	0.569219	0.0693022	-0.597987	-0.341673	-0.493166	-0.263054	-0.39311	-0.320963	-0.754902	-0.588826
26320	PLA2G4F	opHsV0400005079	-1.044	0.764407	-0.816635	-0.343796	-0.63227	-1.37576	-0.962505	-0.308291	-0.448819	2.2271	1.81272	1.45742	0.908206	1.18278	1.57737	0.167575	-0.0518633	0.273343	0.755121	-1.07476	-0.989229	0.0796024	-0.407284	-0.503246	-0.620549	-0.828446	-0.798201
30722	SHCBP1	H200012451	1.42506	0.283258	0.932148	0.175884	0.598801	1.1296	2.03472	0.965199	0.878359	-0.0256854	-0.18315	-0.464143	-0.939311	-0.857151	-0.925599	0.862451	1.02922	1.21818	-0.165304	-1.74145	-0.239001	-0.897012	-0.8528	-0.596383	-1.27705	-1.01158	-1.35726
21821	MAPKAP1	H200019095	-0.125389	0.882117	1.72689	1.27112	1.29751	0.871573	-0.245363	0.0937065	0.665119	-2.37143	-2.07407	-0.941637	-1.42492	-1.16519	-0.519366	-0.423862	-0.344884	-0.0810562	0.81547	1.28044	-0.236207	-0.0617695	-0.058742	0.314131	0.493014	-0.0461008	0.408897
10952	ATP1A2	H200004260	0.620808	0.51574	0.575297	0.414565	0.335577	0.496633	0.626887	0.625893	0.739743	-2.08227	-2.1608	-1.85953	-1.48441	-1.8115	-1.34961	0.341999	0.470057	0.372137	-0.0704941	0.308285	0.461896	0.671021	0.759574	0.633	0.496438	0.622307	0.730753
11906	C16orf30	H200003539	-2.3302	-1.37539	-0.61139	0.189379	-1.36569	-1.72736	0.629637	0.0228759	-0.316147	-0.262375	-0.312956	-0.0997713	-0.936576	-0.225082	-0.802541	0.0635809	0.603993	-0.338115	0.854734	1.06633	1.58784	1.22636	0.660185	0.456774	1.52357	1.20872	0.609612
34312	VASN	H200020238	-0.795501	-0.678485	-3.12092	-0.81758	-0.598734	-0.533406	-0.560613	-1.03575	-0.71026	0.908935	1.35765	2.11677	-0.398439	1.01898	1.43473	0.205719	0.370966	0.553271	0.0517799	-0.402545	-0.310817	0.243233	0.692948	0.272358	0.328408	0.147007	0.260295
756	H300002120	H300002120	0.201212	0.288563	1.12656	2.64161	2.27162	2.12951	0.364277	0.16689	0.347061	-0.21857	-0.947575	-0.675416	-0.0954397	-0.661604	-0.301311	-0.361446	-0.324079	-0.532749	-0.340026	0.249417	-0.61701	-1.39772	-0.86373	-1.16469	-0.335452	-0.386601	-0.563308
984	H300005080	H300005080	0.334251	0.568061	-2.31984	-1.60248	-2.5486	-0.600525	-0.969229	-1.38535	-0.957898	0.410547	1.07808	0.459169	0.621875	0.301998	0.417955	1.28338	0.483914	0.789188	-0.2303	0.238284	0.170466	0.773364	0.678288	0.592904	0.659531	0.280354	0.472612
18793	HLTF	H200000732	2.05964	0.684037	-0.932422	0.850812	1.79766	1.79261	0.312057	0.293732	0.0986909	0.25911	0.143716	-0.239696	0.233833	0.0175478	0.151678	0.46611	0.502121	0.676779	-0.897642	-1.80261	-1.82966	-1.06785	-0.995947	-1.30782	-0.618789	-0.137404	-0.510286
28594	Q96NB8_HUMAN	H200003331	1.20621	0.428973	0.782537	0.773479	1.54284	0.636078	0.924492	1.46085	0.805828	-0.945478	-0.0966891	-1.44213	-0.303958	-0.964297	-1.05874	-1.32734	-0.76227	-1.08143	-0.514072	2.3317	-0.760596	-0.561632	0.401446	-1.08969	-0.0674875	0.0525863	-0.371208
14088	CKAP5	H300015896	-0.631795	-0.595499	0.0331963	1.62692	0.914226	1.97159	-0.237702	0.153919	-0.511791	1.59338	1.08324	0.429095	0.690561	1.637	0.418247	0.131838	0.283448	0.316078	-0.779685	-1.41092	-1.37754	-0.757035	-0.924915	-0.896488	-1.2382	-0.975758	-0.945407
12638	C6orf105	H300018856	0.63715	1.15612	1.0797	1.08887	1.7397	1.53312	0.9154	0.540108	0.710633	0.371488	0.364513	0.203181	-0.270832	-1.69452	-0.75542	-0.353125	-0.441696	-0.576	-1.56697	0.628245	-0.0668853	-1.92775	-1.30149	-1.39139	0.000470301	-0.209403	-0.413222
18258	GRM3	H300006150	-3.18977	-0.689361	-0.387437	-2.25226	-0.697915	-0.49196	-0.794157	-1.02628	0.107709	0.354572	-0.0369147	0.226862	0.190429	0.0886295	0.778554	0.842063	0.238707	0.574354	0.650055	1.17449	0.135195	1.27218	0.983379	0.867007	0.442123	-0.0120853	0.651833
6974	opHsV0400011066	opHsV0400011066	-0.758579	0.021257	1.93434	2.16209	1.68232	1.63062	0.27375	0.0209533	0.419848	-0.921026	-1.32435	-1.63776	-0.722575	-0.87273	-0.415259	-1.05065	-0.966939	-1.05163	0.037071	0.982271	0.41132	0.414077	0.0822748	0.0464853	-0.128492	-0.215413	-0.053269
25794	PCSK1	H200006592	0.315383	0.236402	1.57992	0.758378	0.0625332	0.415761	1.38551	0.773568	0.403813	-1.15483	-0.963389	-0.860867	-1.1232	-0.565787	-0.651467	-1.79452	-1.05525	-1.30115	-1.16344	0.999669	-0.349811	-0.884917	0.437029	1.26102	1.47018	1.12265	0.646805
14509	COX6B1	H200008193	0.823693	1.23759	1.35018	1.50103	1.41254	1.67365	0.802349	0.0650441	0.702818	-0.253878	-0.715149	-0.469427	0.466128	-0.147863	-0.516536	-0.983941	-1.24758	-1.08147	0.0941947	1.53155	-0.480566	-1.02957	-1.11326	-1.40406	-0.397535	-0.67677	-1.14317
30597	SFRS2IP	H300022117	1.21283	0.399213	1.00449	2.41282	2.6908	0.507028	0.25712	0.560274	0.369135	-0.915633	0.220538	-0.961999	0.667627	-0.0841855	0.397061	-0.6415	-0.774129	-1.11718	-0.772162	-1.00699	-0.683768	-0.24615	-0.964921	-0.863313	-0.464197	-0.813217	-0.389604
1872	H300018018	H300018018	0.380717	0.434054	1.18798	2.02251	1.95072	1.9429	0.0838048	0.030394	0.480855	-0.902584	-1.68162	-1.38619	-0.808179	-1.02936	-0.60123	-0.34509	-0.699919	-0.59095	-0.713118	1.5061	-0.604392	-0.533118	-0.375434	-0.0772528	0.202335	-0.18876	0.314826
12575	C4orf15	H200012023	0.873449	0.251102	1.20817	1.30041	1.86585	1.83416	0.43938	1.12224	0.325833	-0.102583	-0.365573	-1.01716	1.03279	0.361885	0.291473	-0.905782	-0.390639	-1.28927	-0.585945	-1.12386	-0.751923	-1.73026	-0.73855	0.607139	-0.594194	-0.605407	-1.31273
31045	SLC2A1	H200007876	1.36386	0.661865	-0.0775355	0.564656	-1.18073	0.257159	0.542215	0.767681	-0.17585	0.563981	0.300433	0.0372763	0.107914	0.437145	0.759394	1.04463	1.94234	1.3924	-0.575412	-0.0649953	-1.46451	-0.486063	-1.61179	-0.447037	-1.56304	-1.1868	-1.90917
8051	opHsV0400012251	opHsV0400012251	-0.499701	-0.589484	-1.4978	-0.794498	-0.832478	0.034777	-2.44524	-1.55278	-0.763736	1.18763	1.49645	1.21843	-0.839103	1.23616	0.446407	0.718328	0.831858	1.13637	-0.270915	0.528858	0.810518	-0.95547	0.537275	0.27559	0.495327	-0.315848	0.403081
19199	HSPG2	H200015112	-0.360335	0.348482	-0.518263	-1.84752	-2.03548	-2.5932	-0.348345	-0.595107	-0.427638	0.735373	0.792162	0.766296	0.351602	0.949073	0.340861	1.43572	1.26489	1.56716	0.119924	0.236559	0.476805	-0.457475	-0.78521	0.099692	0.31319	0.460286	-0.28949
13766	CDYL	H200002536	-0.0934849	-0.20341	1.25225	2.02153	0.760401	1.62734	0.15611	0.0191382	0.56546	-1.38603	-1.2601	-1.32131	-1.67967	-1.25274	-1.33777	-0.640203	-0.600733	0.0386946	0.0558958	1.46811	0.952214	-0.332572	-0.142699	-0.425398	0.718451	0.317389	0.723145
15772	DPY19L4	H300020608	0.404114	-0.498511	0.137913	2.2617	1.34842	1.26831	0.311829	1.2571	0.410792	-1.01399	-1.56445	-2.19796	-0.34613	-0.631131	-0.441458	-1.17545	-0.988973	-0.838585	-0.232058	-0.72025	0.743371	0.0943658	1.17947	0.676149	0.17958	0.108158	0.267674
34964	ZDHHC6	H200003136	0.683701	0.134273	1.04609	2.68529	2.21357	1.67792	0.156168	0.191522	0.464831	-1.26269	-0.982026	-1.7919	-0.367536	-0.0981072	-0.491054	-0.801652	-0.675144	-0.28689	-0.855836	-0.847059	-0.592655	0.0508184	-0.0255578	-0.26667	0.0464348	0.0359741	-0.0418015
7463	opHsV0400011615	opHsV0400011615	-0.411293	0.749051	-0.195289	-1.48622	-2.04263	-1.66616	-1.10745	-1.12065	-0.566974	1.11528	1.32297	1.52996	0.831932	0.974316	0.921373	0.69861	0.395827	0.885324	1.33403	-0.795565	0.0792241	-0.017093	0.249907	0.114984	-0.287074	-1.14373	-0.362657
34347	VEZF1	H200001252	0.929881	0.759338	-0.481437	2.41558	1.97255	0.572201	0.425492	-0.345216	0.309169	0.00901649	-0.688769	-0.694521	-1.19194	-1.03369	-0.878578	-1.41944	-1.26647	-2.15749	0.539216	-0.153644	0.354039	0.341461	0.138504	0.305711	0.360281	0.756702	0.12206
31300	SLIT1	H300013880	0.471544	0.0207947	2.19181	-0.618675	1.21951	1.02625	0.356013	-0.315222	0.0765023	-0.316059	-1.54126	-1.59122	-1.3652	-1.99748	-1.14244	-0.728755	-0.264179	-0.620862	-0.0683151	0.759329	1.60805	0.464146	0.764473	0.556499	0.45784	0.32249	0.274414
28243	Q8N913_HUMAN	opHsV0400001055	-0.760634	-0.414629	-0.721571	-2.2999	-1.681	-1.92144	-0.247531	-0.929224	-0.523569	1.28326	0.819957	1.72468	0.454223	1.12586	0.59217	0.167189	0.124352	-0.491088	1.96921	0.277333	0.182317	0.267958	0.190055	0.240355	0.252331	0.320497	-0.0011606
6447	opHsV0400010477	opHsV0400010477	-0.0290294	0.305025	0.751101	2.48136	2.19872	2.22843	0.45827	0.642877	0.515657	-0.383351	-0.752584	-0.740155	-0.202598	-0.867226	-0.374724	-0.465742	-0.216152	-0.182572	-0.203441	0.0389836	-1.22519	-0.977053	-1.1015	-1.4645	0.0434423	-0.363156	-0.114896
3825	opHsV0400007170	opHsV0400007170	0.621572	0.251044	0.710038	0.450018	0.128428	0.704356	0.343891	0.685473	0.268147	-0.697289	-2.17619	-0.853297	-1.72055	-2.19341	-2.54514	0.295503	0.176052	0.163635	0.501367	0.521131	0.69356	0.418772	0.734542	0.594502	0.55717	0.755309	0.611362
25201	OR51A2	H300009690	-0.434349	0.874383	1.64978	2.39958	1.79956	0.958458	0.99696	0.140766	0.843519	-0.86029	-1.1282	-0.986037	-1.51283	-0.58869	-0.584461	0.154377	0.0441493	-1.3686	-0.111951	0.205563	-0.412831	-0.702719	-0.730213	0.119661	-1.03556	-0.338547	0.608516
28884	Q9P183_HUMAN	opHsV0400002330	-0.897053	0.549845	-0.554968	-1.43643	-0.975894	-1.87194	-0.604684	-1.33518	-0.306828	1.62957	0.130528	1.75134	1.62752	2.28618	0.895851	0.148302	-0.136511	0.613923	0.369766	0.017102	-0.577834	-0.082777	-0.373031	-0.289976	-0.119176	-0.518155	0.0605103
17169	FKBP1A	H300008308	0.201576	0.644464	0.61872	2.26414	1.82157	1.89338	0.579936	0.204204	0.508172	-1.3319	-1.3698	-1.35668	-0.391013	-1.28136	-0.914191	-0.178204	-0.192688	-0.751696	0.295995	1.52849	-0.261879	-0.627451	-0.521087	-0.23872	-0.193342	-0.340539	-0.61011
6992	opHsV0400011086	opHsV0400011086	1.12212	-1.10069	-0.454483	0.810987	0.931321	0.960887	0.251213	-0.16545	-0.211892	-1.62743	-1.02383	-2.0915	0.190851	-0.351578	-0.247774	-1.46393	-0.958808	-1.58251	0.904111	1.76071	0.921325	0.550151	0.71043	0.670468	0.516091	0.724848	0.254365
6874	opHsV0400010948	opHsV0400010948	-0.523904	-0.401666	0.598658	2.55113	2.10378	0.969818	0.182033	1.03031	0.428254	-1.21519	-1.21198	-1.47206	-0.852861	-0.567181	-0.563178	-1.41024	-1.28583	-0.609197	-0.0269629	-0.164435	0.0592396	0.156838	0.542053	0.588657	0.197817	-0.0124657	0.908573
16034	EFCAB4A	H300012771	-0.516449	0.530282	-1.42432	0.410425	-0.887428	-1.0096	-1.0553	-1.12328	-0.558038	1.21824	2.06526	2.45591	0.957716	0.967603	-0.319094	0.964473	0.515812	0.699933	0.240766	-0.995737	-0.901282	-0.688079	-0.747756	-0.425072	-0.47247	0.182697	-0.085209
23335	NOC3L	H200005988	1.39131	0.856114	0.021581	1.40952	0.722995	-0.539048	0.788084	2.11113	0.622094	-1.46807	-1.78074	0.0764438	-0.462445	-1.31629	-1.25774	-1.51306	-0.748686	-0.506157	-0.175165	-1.11479	0.886588	0.503244	0.61108	0.0328376	-0.0253468	0.557736	0.316785
14135	CLDN15	H300007357	0.0333479	-0.617689	-0.635921	-0.7913	-0.673027	-0.527792	-0.0677947	-0.927135	-0.0404459	-0.873927	-0.794726	0.561925	-2.02299	-0.625792	-1.89667	0.0484225	-3.35315e-05	0.292059	0.634637	2.37536	1.34833	0.876411	0.855821	1.25293	0.978121	0.143085	1.09479
2877	opHsV0400003957	opHsV0400003957	-0.063927	0.15581	0.349874	2.03542	1.8401	2.16218	0.740468	0.698977	0.4283	-0.0384986	-0.0296019	0.163452	0.538997	0.538045	0.307177	-0.390289	-0.582853	-0.609584	-0.37221	-0.213689	-1.68498	-1.7672	-1.54331	-1.312	-0.446242	-0.440513	-0.463902
17041	FCRLA	H200016567	0.232563	0.102042	1.65243	1.78305	1.66345	0.904003	0.895472	0.763011	1.02167	-0.387924	-0.246831	-0.430003	-0.879694	-0.656295	-0.88798	-1.30659	-1.03003	-1.48301	-1.87143	0.31683	-0.086426	0.725248	0.722019	0.631028	-0.829361	-0.809781	-0.507476
9850	ADAT1	H300008297	0.495689	0.515554	0.664212	0.439185	0.867171	0.213558	0.327163	0.589171	0.120606	-1.23867	-0.716661	-1.5425	-0.81072	-0.793946	-0.754909	-1.42836	-1.13418	-1.13883	3.40718	-0.31013	0.317982	0.273204	0.0541892	0.186096	0.604042	0.598845	0.195066
31125	SLC36A4	H300009808	1.04363	0.686127	1.10575	1.6268	2.08991	2.4259	-0.296727	0.426259	0.389344	0.176712	-1.24839	-1.42005	-0.274971	-0.636873	0.12005	-0.726509	-0.614646	-1.21121	-0.495582	0.683055	-0.514299	-0.286548	-0.622638	-1.07102	-0.31628	-0.210479	-0.827327
24419	NP_981947.1	H300008820	-0.795054	-1.06242	0.252166	-1.87526	-2.04307	-1.20297	-0.776251	-1.345	-0.573181	-0.203612	0.00407714	0.545308	0.835037	2.11301	1.03739	-0.849921	0.0937996	-0.369321	0.928406	1.20782	0.674353	0.561641	0.782091	0.732308	0.400997	0.356743	0.570918
34501	WDR12	H200005846	2.27291	0.670005	1.82818	1.00851	0.407255	0.411481	0.627989	0.756357	0.748797	-1.70336	-1.3185	-2.48117	-0.196383	-1.23015	0.130906	-0.780101	0.0141971	-0.215218	0.101867	-0.944401	0.0928071	-0.138789	0.14643	0.033549	-0.250682	0.256358	-0.248845
19202	HTATIP	H200001215	-1.03591	0.693646	-0.25013	-2.49646	-1.85317	-1.56775	-0.395198	-1.91393	-0.571926	0.175058	0.213801	0.186955	1.17476	0.432646	0.258538	-0.136437	0.209478	0.538854	0.73643	0.139781	1.05595	0.154938	0.638033	1.27963	0.839069	0.272531	1.22081
31656	SPATA16	H200012887	1.00061	0.3877	1.23365	1.0637	-1.10726	0.398116	0.406353	-0.564525	0.881589	-0.956309	-0.923869	-0.915469	-0.482863	-0.741032	-1.24868	-1.72932	-1.17676	-1.32876	-0.762852	-0.278102	0.643264	1.1659	1.0969	0.497193	0.505418	1.55305	1.38234
30358	SDHB	H300003635	0.422613	0.762037	1.21662	2.33423	1.92953	1.99365	0.43595	0.0879527	0.375473	-1.33887	-0.853747	-1.47778	-0.0859505	-0.736071	-0.285564	-0.129798	0.127659	-0.574336	-0.119437	0.811131	-1.21665	-0.567449	-0.852424	-0.78218	-0.393071	-0.436888	-0.64663
31677	SPATS2	H300019051	0.71626	1.2277	0.250584	1.66396	0.28668	1.19041	1.42356	2.07479	0.227706	0.0609664	-0.54238	-1.00422	0.687205	0.0900743	-0.503163	-0.298078	-0.899681	0.574543	-1.67449	0.595788	-1.43366	-1.38011	-0.351799	-0.726088	-0.63894	-1.31428	-0.303329
26682	PPAPDC1B	H300014306	1.62089	-0.060657	-0.632171	1.18887	1.42154	1.36892	0.695404	0.651738	0.420039	-0.99714	-1.21976	-1.77778	-0.292921	-0.290863	0.0492197	-1.63697	-1.24871	-1.87575	0.33619	1.16195	0.696656	-0.75847	0.14787	0.219952	0.211001	0.604212	-0.00326847
27180	PSMC2	H200005414	-0.710898	0.307829	0.670974	2.1101	1.91802	2.42411	0.322851	0.50183	0.70354	-1.23374	-1.245	-1.12428	-1.16924	-1.29541	-0.897746	-0.52819	-0.549645	-0.303631	-0.0622062	0.809919	-0.565023	-0.0805208	-0.130723	0.00736097	0.402083	-0.0269025	-0.255458
6087	opHsV0400010011	opHsV0400010011	0.260279	-0.820064	1.69051	0.0902956	0.580616	0.48519	-0.551247	-1.62597	-0.938452	-0.584601	-0.186905	-0.604117	-0.8744	-1.41486	-0.542576	-1.32038	-0.734339	-1.59155	0.387239	1.47874	1.14855	0.734778	0.645305	0.934063	1.27579	0.811817	1.2663
31608	SP4	H200000717	1.52168	0.345777	-0.527971	1.72491	1.9318	1.20234	0.677893	-0.0626733	0.38275	0.943955	0.43527	0.0819941	0.759492	0.480735	0.389447	-0.341445	-0.0775818	-0.789232	-0.758416	-1.38049	-1.15872	-1.63058	-1.40496	-1.69067	-0.521836	-0.236479	-0.296977
34412	VPS35	H200016538	0.260892	0.316578	0.601927	2.20207	2.20822	2.25015	0.13039	0.388862	0.259774	-0.97906	-0.940303	-1.30414	-0.956592	-1.56246	-1.08104	-0.484398	-0.271742	-0.360027	0.058556	0.703218	-0.555446	-0.559692	-0.467246	-0.437489	-0.00681813	-0.0516705	0.637477
1908	H300019777	H300019777	0.227306	1.12676	0.00961982	2.03401	2.11377	2.52194	0.337434	0.00265099	0.275118	-0.133441	-0.945763	-1.02668	-0.503899	-1.68824	-1.00127	-1.01187	-0.634999	-0.955093	0.55364	-0.733338	0.0488313	-0.334185	0.259825	-0.151348	-0.057073	-0.123623	-0.210077
23859	NP_056350.1	H300012382	0.297839	-0.583839	-2.29464	-0.74951	-0.888149	-0.788305	-1.54329	-1.55796	-1.2105	0.612429	0.536733	0.539848	0.133673	0.763372	0.96693	0.795814	1.05397	1.19847	0.406662	1.79333	0.290481	0.74918	0.806378	0.616446	-0.486614	-0.851951	-0.606795
19258	IBRDC2	opHsV0400004499	-0.963	-1.62517	1.14778	-0.136938	0.0380806	0.284521	-0.780682	-0.970609	-0.771655	-1.26347	-1.45248	-1.30646	-0.122339	-0.170842	0.235716	-0.716221	-0.290202	-0.653486	0.611669	2.03602	1.36645	0.739835	1.04395	0.920395	1.40269	0.190538	1.20592
22916	NAT8L	opHsV0400012862	0.330967	-0.060017	-0.498984	-2.32696	-1.7762	-0.803729	-1.75698	-1.98526	-0.562811	0.76186	-0.159432	0.489992	0.542556	-0.0916158	0.412159	0.223804	0.679664	0.421034	1.45423	-0.237933	0.142671	0.853487	1.03595	1.24368	0.574879	-0.00189322	1.09489
[truncated: 2,104 more rows]
